# Supplementary material
Source: PubMed Central journal article supplement (PMC2723986)

## Supplemental Figure 1

### Grouping of the 53 biopsy samples used for hybridization onto Affymetrix HG U133 Plus 2.0 microarrays.

Grouping of the 53 biopsy samples used for hybridization onto Affymetrix HG U133 Plus 2.0 microarrays. Implantation biopsies were obtained prior to reperfusion. \*For one of these 9 living donor kidney recipients of the engraftment biopsy training set no post-transplant samples were available. \*\*One post-transplant biopsy of the paired set was also included in the post-transplantation test set of 9 living donor kidneys (test set 2).

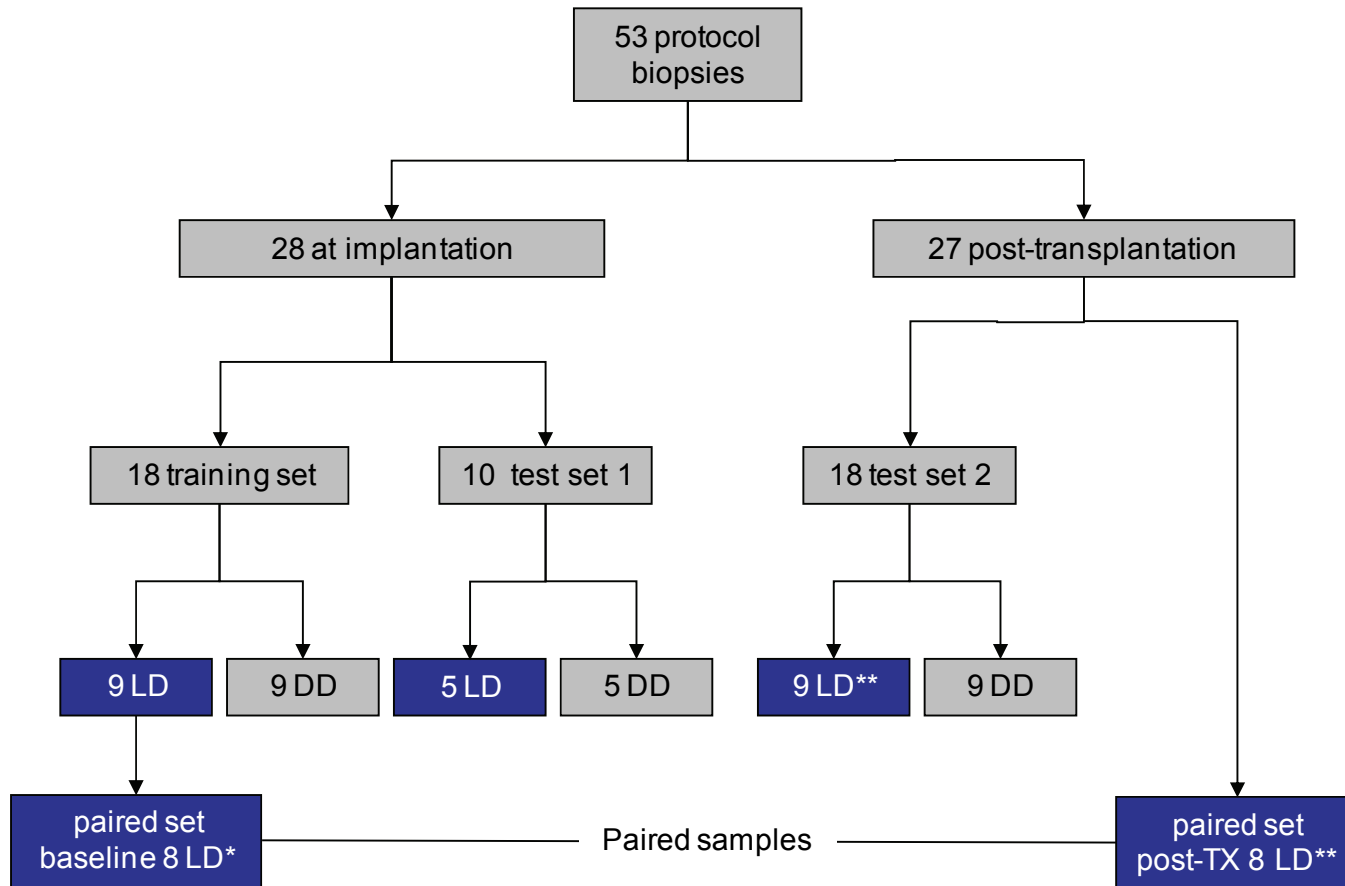

Supplement: ASN.2008111145_1.pdf [file ASN.2008111145_1.pdf]
