# Supplementary material
Source: PubMed Central journal article supplement (PMC2723986)

## Supplemental Figure 2

### Unsupervised average-linkage hierarchical clustering of 18 renal allograft biopsies of the training set obtained at implantation

Unsupervised average-linkage hierarchical clustering of 18 renal allograft biopsies of the training set obtained at implantation, after filtering with a threshold of at least a 3-fold difference from the median expression in at least 5 different samples. The degree of relatedness of the expression patterns in biopsy samples is represented by the dendrogram.

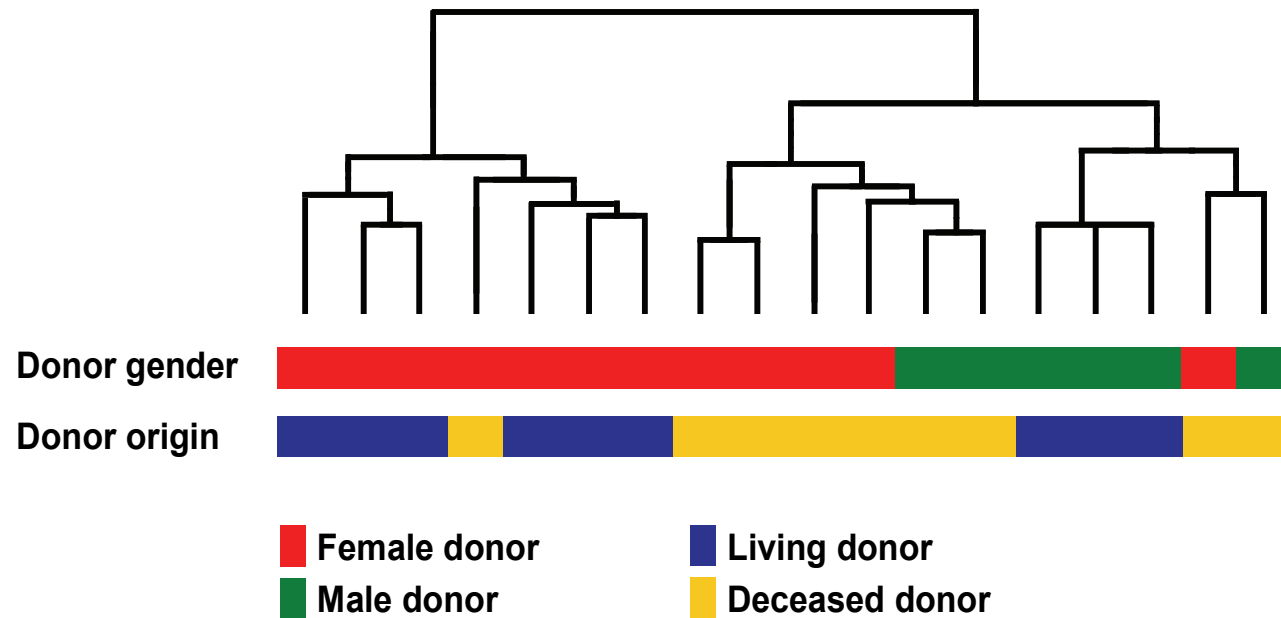

Supplement: ASN.2008111145_2.pdf [file ASN.2008111145_2.pdf]
