# Supplementary material
Source: PubMed Central journal article supplement (PMC2723986)

### Supplemental Figure 4

Prediction performance of a 34 probe set algorithm trained in 18 implantation biopsies of the training set (9 deceased and 9 living donor kidneys) on the 10 test set 1 implantation biopsy samples.

Prediction performance of a 34 probe set algorithm trained in 18 implantation biopsies of the training set (9 deceased and 9 living donor kidneys; Tr1-Tr18) on the 10 test set 1 implantation biopsy samples (Te1-Te10), using Prediction Analysis of Microarrays software. All test set biopsies were assigned to the correct donor origin groups.

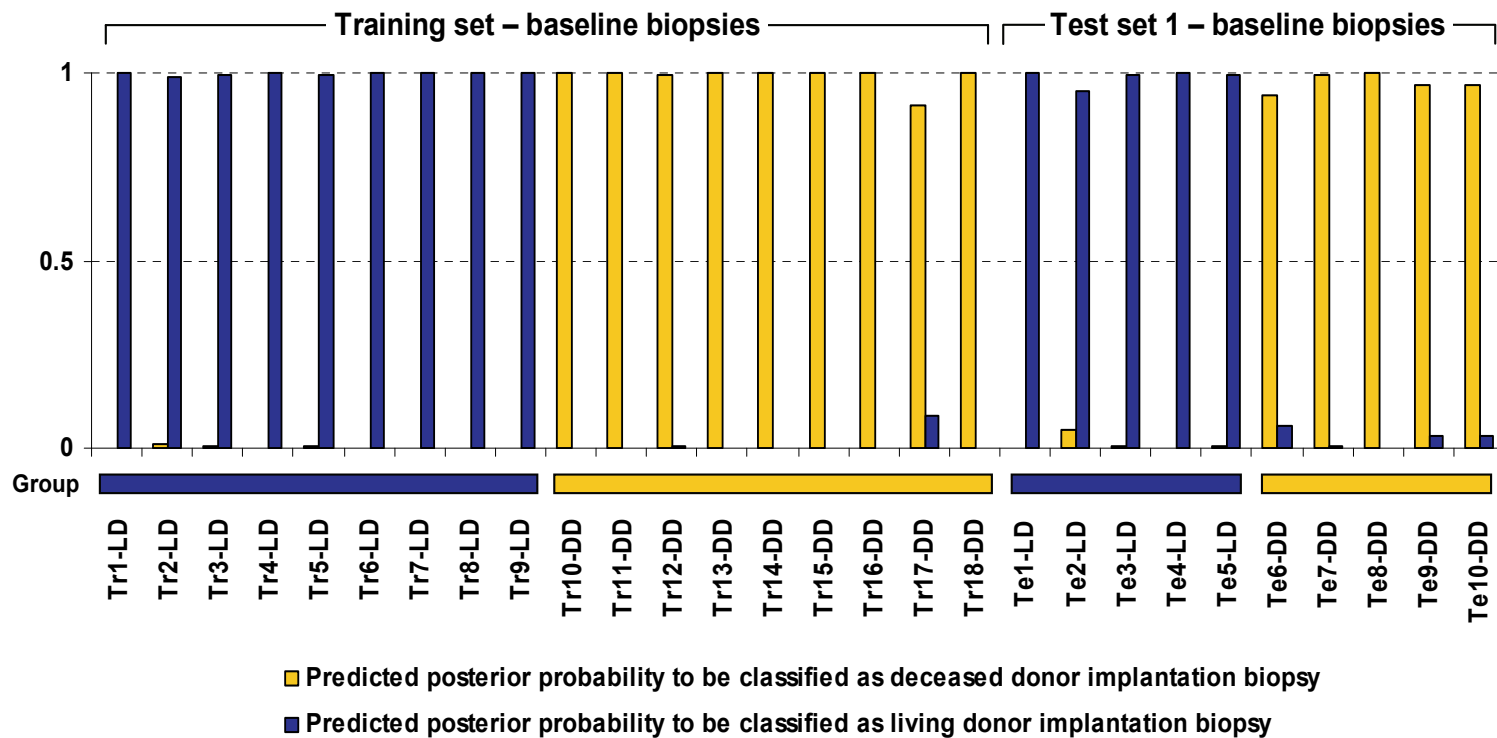

Supplement: ASN.2008111145_4.pdf [file ASN.2008111145_4.pdf]
