# Supplementary material
Source: PubMed Central journal article supplement (PMC2723986)

## Supplemental Figure 5

### Evolution of complement gene expression in implantation biopsies according to donor source and cold ischemia time.

Evolution of complement gene expression in implantation biopsies according to donor source and cold ischemia time, expressed as fold difference from the expression level in implantation biopsies from living donor kidneys. \*ANOVA P value <0.05 compared to LD, after Bonferroni correction. #ANOVA P value <0.05 compared to DD <10 hours cold ischemia time, after Bonferroni correction

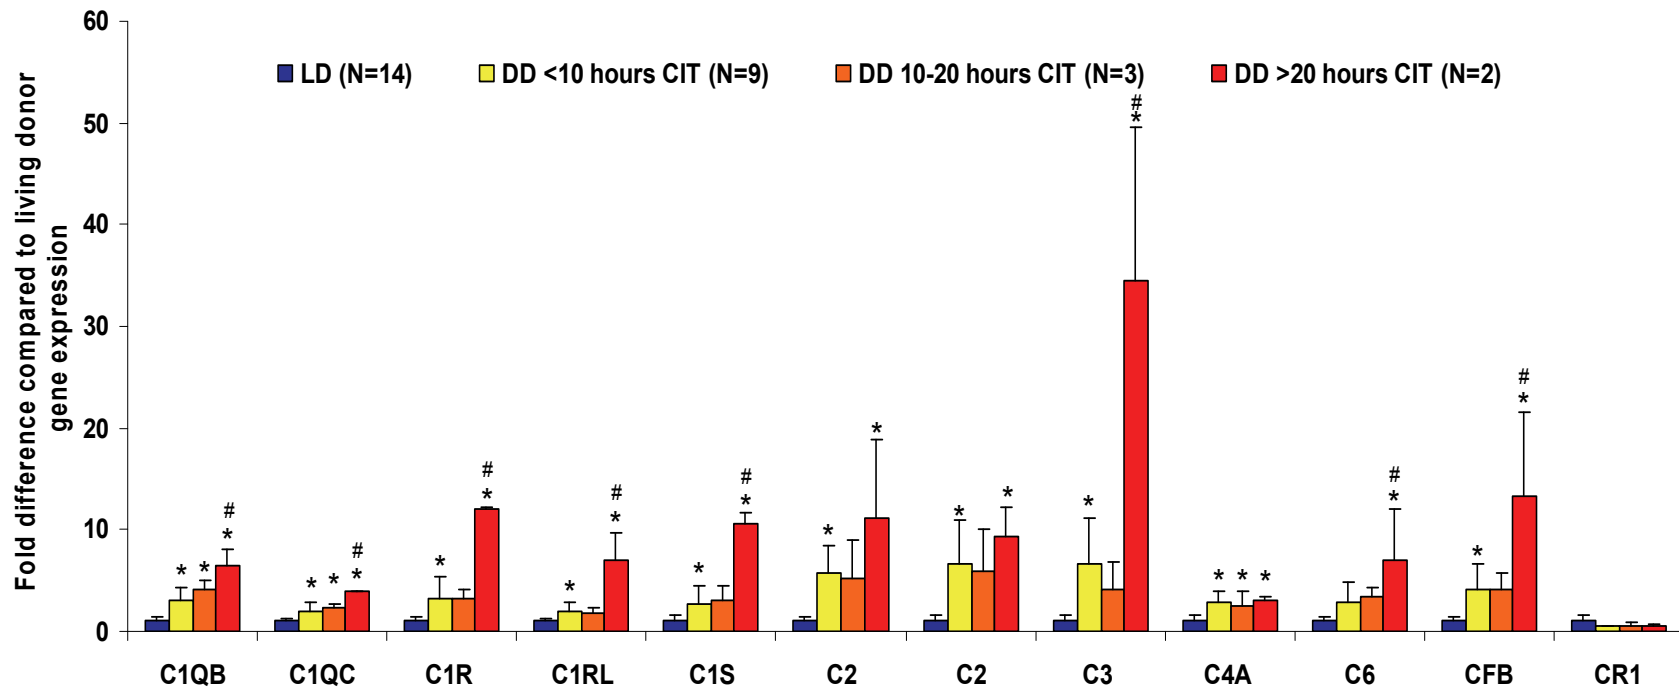

Supplement: ASN.2008111145_5.pdf [file ASN.2008111145_5.pdf]
