# Supplementary material
Source: PubMed Central journal article supplement (PMC2723986)
Supplement: ASN.2008111145_6.pdf [file ASN.2008111145_6.pdf]

Supplemental Table 1

Clinical and histological information for the 53 protocol biopsy samples included

| Sample ID | Sample group                 | Living vs. Deceased donor | Biopsy ID    | Paired baseline-postTX patient ID | Sample ID | Time point after transplantation | Cold ischemia time (hours) | Donor gender (0=female, 1=male) | Donor age (years) | Recipient gender (0=female, 1=male) | Recipient age (years) | Schwartz GFR at 3 months | Schwartz GFR at 6 months | Schwartz GFR at 12 months | Schwartz GFR at 24 months | Schwartz GFR at 36 months | Tubulitis | Interstitial inflammation | Glomerulitis | Vasculitis | Transplant glomerulopathy | Vascular intimal thickening | Interstitial fibrosis | Tubular atrophy | Arteriolar hyalinosis | Ischemic glomerular changes | Tubular vacuolisation | Global glomerulosclerosis scores | Tubular calcifications |   |   |   |
|-----------|------------------------------|---------------------------|--------------|-----------------------------------|-----------|----------------------------------|----------------------------|---------------------------------|-------------------|-------------------------------------|-----------------------|--------------------------|--------------------------|---------------------------|---------------------------|---------------------------|-----------|---------------------------|--------------|------------|---------------------------|-----------------------------|-----------------------|-----------------|-----------------------|-----------------------------|-----------------------|----------------------------------|------------------------|---|---|---|
| 1         | Baseline biopsy training set | LIVING                    | Training-LD1 | A                                 | KT0412    | 0                                | 4,0                        | 0                               | 39,9              | 1                                   | 14,7                  | 73,8                     | 97,0                     | 84,1                      | 105,5                     | 115,0                     | 0         | 0                         | 0            | 0          | 0                         | 0                           | 0                     | 0               | 0                     | 0                           | 0                     | 0                                | 0                      | 0 |   |   |
| 2         |                              |                           | Training-LD2 | B                                 | KT0613    | 0                                | 0,5                        | 1                               | 21,9              | 1                                   | 1,8                   | 131,7                    | 126,0                    | NA                        | NA                        | NA                        | NA        | 0                         | 0            | 0          | 0                         | 0                           | 0                     | 0               | 0                     | 0                           | 0                     | 0                                | 0                      | 1 | 0 |   |
| 3         |                              |                           | Training-LD3 |                                   | KT0624    | 0                                | 3,0                        | 0                               | 57,7              | 1                                   | 21,5                  | 62,2                     | 68,5                     | 70,6                      | 76,0                      | 73,0                      | 0         | 0                         | 0            | 0          | 0                         | 0                           | 0                     | 0               | 0                     | 0                           | 0                     | 0                                | 0                      | 0 | 1 | 0 |
| 4         |                              |                           | Training-LD4 | C                                 | KT0636    | 0                                | 3,0                        | 0                               | 30,5              | 1                                   | 9,2                   | 122,8                    | 125,6                    | 100,1                     | 114,7                     | 121,0                     | 0         | 0                         | 0            | 0          | 0                         | 0                           | 0                     | 0               | 0                     | 1                           | 0                     | 0                                | 0                      | 1 | 0 |   |
| 5         |                              |                           | Training-LD5 | D                                 | KT0650    | 0                                | 0,5                        | 0                               | 52,5              | 1                                   | 8,5                   | 93,7                     | 110,7                    | 106,1                     | 101,0                     | 99,0                      | 0         | 0                         | 0            | 0          | 0                         | 0                           | 1                     | 0               | 0                     | 1                           | 0                     | 0                                | 1                      | 0 |   |   |
| 6         |                              |                           | Training-LD6 | E                                 | KT0690-2  | 0                                | 3,0                        | 0                               | 47,0              | 1                                   | 16,6                  | 70,6                     | 76,5                     | 69,1                      | 78,0                      | 75,0                      | 0         | 0                         | 0            | 0          | 0                         | 0                           | 0                     | 0               | 0                     | 1                           | 0                     | 1                                | 0                      | 1 | 0 |   |
| 7         |                              |                           | Training-LD7 | F                                 | KT0730    | 0                                | 4,0                        | 0                               | 33,3              | 1                                   | 1,1                   | 146,1                    | 153,1                    | 160,2                     | 166,0                     | 156,0                     | 0         | 0                         | 0            | 0          | 0                         | 0                           | 0                     | 0               | 0                     | 0                           | 0                     | 0                                | 0                      | 0 | 0 | 0 |
| 8         |                              |                           | Training-LD8 | G                                 | KT0736    | 0                                | 4,0                        | 1                               | 27,1              | 0                                   | 1,2                   | 125,7                    | 115,6                    | 122,4                     | 124,0                     | 121,0                     | 0         | 0                         | 0            | 0          | 0                         | 0                           | 0                     | 0               | 0                     | 0                           | 0                     | 0                                | 0                      | 0 | 0 | 0 |
| 9         |                              |                           | Training-LD9 | H                                 | KT0755    | 0                                | 3,0                        | 1                               | 40,8              | 1                                   | 15,0                  | 105,4                    | 119,8                    | 114,9                     | 115,0                     | 111,0                     | 0         | 0                         | 0            | 0          | 0                         | 0                           | 0                     | 0               | 0                     | 1                           | 0                     | 0                                | 0                      | 1 | 0 |   |
| 10        |                              | DECEASED                  | Training-DD1 |                                   | KT0776    | 0                                | 9,1                        | 0                               | 26,0              | 1                                   | 17,6                  | 91,6                     | 106,0                    | 108,3                     | 100,0                     | 96,0                      | 0         | 0                         | 0            | 0          | 0                         | 0                           | 0                     | 0               | 1                     | 0                           | 0                     | 0                                | 0                      | 0 | 0 |   |
| 11        |                              |                           | Training-DD2 |                                   | KT0781    | 0                                | 6,0                        | 0                               | 21,5              | 0                                   | 18,6                  | 70,6                     | 92,8                     | 25,4                      | 30,0                      | 23,0                      | 0         | 0                         | 0            | 0          | 0                         | 0                           | 0                     | 0               | 0                     | 0                           | 0                     | 0                                | 0                      | 0 | 0 | 0 |
| 12        |                              |                           | Training-DD3 |                                   | KT0796    | 0                                | 8,4                        | 0                               | 20,0              | 1                                   | 17,3                  | 88,7                     | 76,1                     | 82,2                      | 77,0                      | 68,0                      | 0         | 0                         | 0            | 0          | 0                         | 0                           | 0                     | 1               | 0                     | 1                           | 0                     | 1                                | 0                      | 0 | 0 | 0 |
| 13        |                              |                           | Training-DD4 |                                   | KT0812    | 0                                | 28,4                       | 1                               | 25,0              | 1                                   | 18,0                  | 58,6                     | 60,0                     | 57,0                      | 55,0                      | 52,0                      | 0         | 0                         | 0            | 0          | 0                         | 0                           | 0                     | 0               | 0                     | 0                           | 0                     | 0                                | 0                      | 0 | 0 | 0 |
| 14        |                              |                           | Training-DD5 |                                   | KT0814    | 0                                | 8,6                        | 1                               | 25,0              | 1                                   | 16,6                  | 110,1                    | 122,3                    | 122,8                     | 104,0                     | 100,0                     | 0         | 0                         | 0            | 0          | 0                         | 0                           | 0                     | 0               | 0                     | 0                           | 0                     | 0                                | 0                      | 0 | 0 | 0 |
| 15        |                              |                           | Training-DD6 |                                   | KT0817    | 0                                | 16,6                       | 0                               | 31,0              | 1                                   | 17,1                  | 95,4                     | 95,0                     | 95,2                      | 89,0                      | 78,0                      | 0         | 0                         | 0            | 0          | 0                         | 0                           | 0                     | 0               | 0                     | 0                           | 0                     | 0                                | 0                      | 0 | 0 | 0 |
| 16        |                              |                           | Training-DD7 |                                   | KT0818    | 0                                | 13,0                       | 0                               | 31,0              | 1                                   | 15,0                  | 64,5                     | 59,7                     | 70,8                      | 68,0                      | 65,0                      | 0         | 0                         | 0            | 0          | 0                         | 0                           | 0                     | 0               | 0                     | 1                           | 0                     | 0                                | 0                      | 0 | 0 | 0 |
| 17        |                              |                           | Training-DD8 |                                   | KT0922    | 0                                | 5,0                        | 0                               | 28,9              | 1                                   | 4,6                   | 198,7                    | 153,3                    | 132,0                     | 117,0                     | 102,0                     | 0         | 0                         | 0            | 0          | 0                         | 0                           | 0                     | 0               | 0                     | 0                           | 0                     | 0                                | 0                      | 0 | 0 | 0 |
| 18        |                              |                           | Training-DD9 |                                   | KT0986    | 0                                | 16,6                       | 1                               | 19,0              | 1                                   | 6,5                   | 142,0                    | 120,5                    | 105,0                     | 98,0                      | 79,0                      | 0         | 0                         | 0            | 0          | 0                         | 0                           | 0                     | 0               | 0                     | 0                           | 0                     | 0                                | 0                      | 0 | 0 | 0 |







Supplemental Table 1 (continued)

|    |                                         |        |                                           |   |            |        |     |   |      |   |          |           |           |           |           |           |   |   |   |   |   |   |   |   |   |   |   |   |   |   |   |   |   |
|----|-----------------------------------------|--------|-------------------------------------------|---|------------|--------|-----|---|------|---|----------|-----------|-----------|-----------|-----------|-----------|---|---|---|---|---|---|---|---|---|---|---|---|---|---|---|---|---|
| 47 | Post-transplant<br>biopsy<br>paired set | LIVING | Post-TX<br>paired<br>1                    | A | KT054<br>8 | 1<br>2 | 4,0 | 0 | 39,9 | 1 | 14,<br>7 | 73,8      | 97,0      | 84,1      | 105,<br>5 | 115,<br>0 | 0 | 0 | 0 | 0 | 0 | 0 | 0 | 0 | 0 | 1 | 1 | 0 | 1 | 0 | 1 | 0 |   |
| 30 |                                         |        | Post-TX<br>paired<br>2 =<br>Test2-<br>LD2 | B | KT065<br>2 | 3      | 0,5 | 1 | 21,9 | 1 | 1,8      | 131,<br>7 | 126,<br>0 | NA        | NA        | NA        | 0 | 0 | 0 | 0 | 0 | 0 | 0 | 0 | 0 | 0 | 1 | 0 | 0 | 0 | 0 | 0 |   |
| 48 |                                         |        | Post-TX<br>paired<br>3                    | C | KT087<br>6 | 1<br>2 | 3,0 | 0 | 30,5 | 1 | 9,2      | 122,<br>8 | 125,<br>6 | 100,<br>1 | 114,<br>7 | 121,<br>0 | 0 | 0 | 0 | 0 | 0 | 0 | 0 | 0 | 0 | 0 | 0 | 0 | 0 | 0 | 0 | 0 | 0 |
| 49 |                                         |        | Post-TX<br>paired<br>4                    | D | KT069<br>1 | 3      | 0,5 | 0 | 52,5 | 1 | 8,5      | 93,7      | 110,<br>7 | 106,<br>1 | 101,<br>0 | 99,0      | 0 | 0 | 0 | 0 | 0 | 0 | 2 | 1 | 1 | 0 | 0 | 0 | 0 | 0 | 0 | 0 |   |
| 50 |                                         |        | Post-TX<br>paired<br>5                    | E | KT092<br>1 | 1<br>2 | 3,0 | 0 | 47,0 | 1 | 16,<br>6 | 70,6      | 76,5      | 69,1      | 78,0      | 75,0      | 0 | 0 | 0 | 0 | 0 | 0 | 0 | 0 | 0 | 0 | 1 | 0 | 1 | 0 | 0 | 0 |   |
| 51 |                                         |        | Post-TX<br>paired<br>6                    | F | KT078<br>0 | 3      | 4,0 | 0 | 33,3 | 1 | 1,1      | 146,<br>1 | 153,<br>1 | 160,<br>2 | 124,<br>0 | 121,<br>0 | 0 | 0 | 0 | 0 | 0 | 0 | 1 | 0 | 1 | 0 | 0 | 0 | 0 | 0 | 0 | 0 |   |
| 52 |                                         |        | Post-TX<br>paired<br>7                    | G | KT078<br>5 | 3      | 4,0 | 1 | 27,1 | 0 | 1,2      | 125,<br>7 | 115,<br>6 | 122,<br>4 | 124,<br>0 | 121,<br>0 | 0 | 0 | 0 | 0 | 0 | 0 | 2 | 0 | 1 | 0 | 0 | 0 | 2 | 1 | 0 |   |   |
| 53 |                                         |        | Post-TX<br>paired<br>8                    | H | KT088<br>0 | 6      | 3,0 | 1 | 40,8 | 1 | 15,<br>0 | 105,<br>4 | 119,<br>8 | 114,<br>9 | 115,<br>0 | 111,<br>0 | 0 | 0 | 0 | 0 | 0 | 0 | 0 | 0 | 0 | 0 | 1 | 0 | 1 | 0 | 0 | 0 |   |
