# Supplementary material
Source: PubMed Central journal article supplement (PMC2723986)
Supplement: ASN.2008111145_7.pdf [file ASN.2008111145_7.pdf]

## Supplemental Table 2

Two-class unpaired Significance Analysis of Microarrays comparing gene expression between living (N=9) and deceased (N=9) donor kidneys in biopsies at implantation

| Probe Set ID                                                                                         | UniGene ID | Gene Symbol | UniGene Name                                                                             | Fold Difference | q-value (%) |
|------------------------------------------------------------------------------------------------------|------------|-------------|------------------------------------------------------------------------------------------|-----------------|-------------|
| <b>Probe sets higher expressed in deceased compared to living donor implantation kidneys (N=479)</b> |            |             |                                                                                          |                 |             |
| 202018_s_at                                                                                          | hs.529517  | LTF         | lactotransferrin                                                                         | 19,52           | 0,00        |
| 202376_at                                                                                            | hs.534293  | SERPINA3    | serpin peptidase inhibitor, clade A (alpha-1 antiproteinase, antitrypsin), member 3      | 18,97           | 0,00        |
| 209752_at                                                                                            | hs.49407   | REG1A       | regenerating islet-derived 1 alpha (pancreatic stone protein, pancreatic thread protein) | 18,26           | 0,00        |
| 217767_at                                                                                            | hs.529053  | C3          | similar to Complement C3 precursor                                                       | 8,96            | 0,00        |
| 221872_at                                                                                            | hs.131269  | RARRES1     | retinoic acid receptor responder (tazarotene induced) 1                                  | 5,85            | 0,00        |
| 204787_at                                                                                            | hs.8904    | VSIG4       | V-set and immunoglobulin domain containing 4                                             | 5,62            | 0,00        |
| 205334_at                                                                                            | hs.515715  | S100A1      | S100 calcium binding protein A1                                                          | 5,55            | 0,00        |
| 213436_at                                                                                            | hs.75110   | CNR1        | cannabinoid receptor 1 (brain)                                                           | 5,46            | 0,00        |
| 215049_x_at                                                                                          | hs.504641  | CD163       | CD163 molecule                                                                           | 4,92            | 0,00        |
| 210548_at                                                                                            | hs.169191  | CCL23       | chemokine (C-C motif) ligand 23                                                          | 4,80            | 0,00        |
| 203645_s_at                                                                                          | hs.504641  | CD163       | CD163 molecule                                                                           | 4,77            | 0,00        |
| 202357_s_at                                                                                          | hs.69771   | CFB         | complement factor B                                                                      | 4,67            | 0,00        |
| 208747_s_at                                                                                          | hs.458355  | C1S         | complement component 1, s subcomponent                                                   | 4,56            | 0,00        |
| 202075_s_at                                                                                          | hs.439312  | PLTP        | phospholipid transfer protein                                                            | 4,43            | 0,00        |
| 212067_s_at                                                                                          | hs.524224  | C1R         | complement component 1, r subcomponent                                                   | 3,98            | 0,00        |
| 202953_at                                                                                            | hs.8986    | C1QB        | complement component 1, q subcomponent, B chain                                          | 3,98            | 0,00        |
| 1555725_a_at                                                                                         | hs.24950   | UPK1B       | regulator of G-protein signalling 5                                                      | 3,79            | 0,00        |
| 205866_at                                                                                            | hs.333383  | FCN3        | ficolin (collagen/fibrinogen domain containing) 3 (Hakata antigen)                       | 3,76            | 0,00        |
| 224646_x_at                                                                                          | hs.533566  | H19         | H19, imprinted maternally expressed untranslated                                         | 3,72            | 0,00        |

|             |           |          | mRNA                                                                                              |      |      |
|-------------|-----------|----------|---------------------------------------------------------------------------------------------------|------|------|
| 242271_at   | hs.164073 | SLC26A9  | solute carrier family 26, member 9                                                                | 3,72 | 0,00 |
| 228501_at   | hs.411308 | GALNTL2  | UDP-N-acetyl-alpha-D-galactosamine:polypeptide N-acetylgalactosaminyltransferase-like 2           | 3,61 | 0,00 |
| 211048_s_at | hs.93659  | PDIA4    | protein disulfide isomerase family A, member 4                                                    | 3,35 | 0,00 |
| 209436_at   | hs.654637 | SPON1    | spondin 1, extracellular matrix protein                                                           | 3,32 | 0,00 |
| 203923_s_at | hs.292356 | CYBB     | cytochrome b-245, beta polypeptide (chronic granulomatous disease)                                | 3,28 | 0,00 |
| 201042_at   | hs.517033 | TGM2     | transglutaminase 2 (C polypeptide, protein-glutamine-gamma-glutamyltransferase)                   | 3,28 | 0,00 |
| 211126_s_at | hs.530904 | CSRP2    | cysteine and glycine-rich protein 2                                                               | 3,28 | 0,00 |
| 210168_at   | hs.481992 | C6       | complement component 6                                                                            | 3,11 | 0,00 |
| 224156_x_at | hs.654970 | IL17RB   | interleukin 17 receptor B                                                                         | 3,04 | 0,00 |
| 36019_at    | hs.654371 | STK19    | serine/threonine kinase 19                                                                        | 3,00 | 0,00 |
| 219255_x_at | hs.654970 | IL17RB   | interleukin 17 receptor B                                                                         | 2,96 | 0,00 |
| 240770_at   | hs.162246 | TMEM171  | transmembrane protein 171                                                                         | 2,89 | 0,00 |
| 212173_at   | hs.470907 | AK2      | adenylate kinase 2                                                                                | 2,88 | 0,00 |
| 210652_s_at | hs.112949 | C1orf34  | chromosome 1 open reading frame 34                                                                | 2,87 | 0,00 |
| 207030_s_at | hs.530904 | CSRP2    | cysteine and glycine-rich protein 2                                                               | 2,83 | 0,00 |
| 233022_at   | hs.47288  | TRPM3    | transient receptor potential cation channel, subfamily M, member 3                                | 2,77 | 0,00 |
| 225949_at   | hs.521926 | NRBP2    | nuclear receptor binding protein 2                                                                | 2,75 | 0,00 |
| 228434_at   | hs.546502 | BTNL9    | butyrophilin-like 9                                                                               | 2,67 | 0,00 |
| 1558152_at  | hs.657010 | TSPAN4   | CDNA FLJ35102 fis, clone PLACE6006474, weakly similar to ADHESIVE PLAQUE MATRIX PROTEIN PRECURSOR | 2,65 | 0,00 |
| 207469_s_at | hs.495728 | PIR      | pirin (iron-binding nuclear protein)                                                              | 2,32 | 0,00 |
| 227179_at   | hs.561815 | STAU2    | staufen, RNA binding protein, homolog 2 (Drosophila)                                              | 2,24 | 0,00 |
| 228195_at   | hs.389311 | MGC13057 | hypothetical protein MGC13057                                                                     | 2,23 | 0,00 |
| 221643_s_at | hs.463041 | RERE     | arginine-glutamic acid dipeptide (RE) repeats                                                     | 2,13 | 0,00 |
| 206392_s_at | hs.131269 | RARRES1  | retinoic acid receptor responder (tazarotene induced) 1                                           | 6,62 | 0,64 |
| 1554533_at  | hs.408903 | C2       | complement component 2                                                                            | 5,01 | 0,64 |
| 203052_at   | hs.408903 | C2       | complement component 2                                                                            | 4,67 | 0,64 |

|              |           |                                       |                                                                                                                 |      |      |
|--------------|-----------|---------------------------------------|-----------------------------------------------------------------------------------------------------------------|------|------|
| 220437_at    | hs.534467 | LOC55908                              | hepatocellular carcinoma-associated gene TD26                                                                   | 4,51 | 0,64 |
| 1556069_s_at | hs.420830 | HIF3A                                 | hypoxia inducible factor 3, alpha subunit                                                                       | 3,69 | 0,64 |
| 225987_at    | hs.521008 | STEAP4                                | STEAP family member 4                                                                                           | 3,26 | 0,64 |
| 223923_at    | hs.517235 | C21orf62                              | chromosome 21 open reading frame 62                                                                             | 3,06 | 0,64 |
| 219690_at    | hs.352548 | TMEM149                               | transmembrane protein 149                                                                                       | 3,01 | 0,64 |
| 240207_at    | hs.664722 | CCDC64                                | Transcribed locus                                                                                               | 2,94 | 0,64 |
| 224997_x_at  | hs.533566 | H19                                   | H19, imprinted maternally expressed untranslated mRNA                                                           | 2,91 | 0,64 |
| 219884_at    | hs.103137 | LHX6                                  | LIM homeobox 6                                                                                                  | 2,84 | 0,64 |
| 226311_at    | hs.23871  | CDNA clone IMAGE                      | CDNA clone IMAGE:30924414                                                                                       | 2,74 | 0,64 |
| 227719_at    | hs.586812 | Transcribed locus                     | Transcribed locus                                                                                               | 2,61 | 0,64 |
| 211981_at    | hs.17441  | COL4A1                                | collagen, type IV, alpha 1                                                                                      | 2,54 | 0,64 |
| 229802_at    | hs.593316 | CDNA FLJ14388 fis, clone HEMBA1002716 | CDNA FLJ14388 fis, clone HEMBA1002716                                                                           | 2,53 | 0,64 |
| 224348_s_at  | hs.533566 | H19                                   | H19, imprinted maternally expressed untranslated mRNA                                                           | 2,42 | 0,64 |
| 218857_s_at  | hs.535326 | ASRGL1                                | asparaginase like 1                                                                                             | 2,41 | 0,64 |
| 211936_at    | hs.605502 | HSPA5                                 | heat shock 70kDa protein 5 (glucose-regulated protein, 78kDa)                                                   | 2,32 | 0,64 |
| 234321_x_at  | hs.652741 | NHSL1                                 | NHS-like 1                                                                                                      | 2,28 | 0,64 |
| 201149_s_at  | hs.644633 | TIMP3                                 | TIMP metalloproteinase inhibitor 3 (Sorsby fundus dystrophy, pseudoinflammatory)                                | 2,19 | 0,64 |
| 223197_s_at  | hs.410406 | SMARCAD1                              | SWI/SNF-related, matrix-associated actin-dependent regulator of chromatin, subfamily a, containing DEAD/H box 1 | 2,06 | 0,64 |
| 212856_at    | hs.475150 | DIP                                   | death-inducing-protein                                                                                          | 1,92 | 0,64 |
| 216233_at    | hs.504641 | CD163                                 | CD163 molecule                                                                                                  | 3,27 | 0,92 |
| 214657_s_at  | hs.648467 | TncRNA                                | Trophoblast-derived noncoding RNA                                                                               | 3,26 | 0,92 |
| 226804_at    | hs.268874 | FAM20A                                | family with sequence similarity 20, member A                                                                    | 3,17 | 0,92 |
| 213479_at    | hs.3281   | NPTX2                                 | neuronal pentraxin II                                                                                           | 2,96 | 0,92 |
| 224361_s_at  | hs.654970 | IL17RB                                | interleukin 17 receptor B                                                                                       | 2,90 | 0,92 |
| 225355_at    | hs.91521  | DKFZP761M1511                         | hypothetical protein DKFZP761M1511                                                                              | 2,62 | 0,92 |
| 202007_at    | hs.356624 | NID1                                  | nidogen 1                                                                                                       | 2,50 | 0,92 |

|             |           |                                                                                           |                                                                                           |      |      |
|-------------|-----------|-------------------------------------------------------------------------------------------|-------------------------------------------------------------------------------------------|------|------|
| 225288_at   | hs.593318 | Full-length cDNA clone CSODI001YP15 of Placenta Cot 25-normalized of Homo sapiens (human) | Full-length cDNA clone CSODI001YP15 of Placenta Cot 25-normalized of Homo sapiens (human) | 2,20 | 0,92 |
| 235355_at   | hs.609017 | MRNA; cDNA DKFZp564E143 (from clone DKFZp564E143)                                         | MRNA; cDNA DKFZp564E143 (from clone DKFZp564E143)                                         | 2,14 | 0,92 |
| 204032_at   | hs.36958  | BCAR3                                                                                     | breast cancer anti-estrogen resistance 3                                                  | 1,99 | 0,92 |
| 213908_at   | hs.212670 | WHDC1L1                                                                                   | WAS protein homology region 2 domain containing 1-like 1                                  | 1,93 | 0,92 |
| 220462_at   | hs.470479 | TAIP-2                                                                                    | family with sequence similarity 130, member A2                                            | 2,70 | 1,14 |
| 207332_s_at | hs.529618 | TFRC                                                                                      | transferrin receptor (p90, CD71)                                                          | 2,34 | 1,14 |
| 205618_at   | hs.190341 | PRRG1                                                                                     | proline rich Gla (G-carboxyglutamic acid) 1                                               | 2,07 | 1,14 |
| 239963_at   | hs.126893 | Transcribed locus                                                                         | Transcribed locus                                                                         | 1,96 | 1,14 |
| 218987_at   | hs.591151 | ATF7IP                                                                                    | activating transcription factor 7 interacting protein                                     | 1,95 | 1,14 |
| 224030_s_at | ---       | ---                                                                                       | ---                                                                                       | 1,84 | 1,14 |
| 206697_s_at | hs.655196 | HP                                                                                        | haptoglobin                                                                               | 4,12 | 1,43 |
| 221044_s_at | hs.125300 | TRIM34                                                                                    | tripartite motif-containing 34                                                            | 2,98 | 1,43 |
| 205549_at   | hs.80296  | PCP4                                                                                      | Purkinje cell protein 4                                                                   | 2,92 | 1,43 |
| 215076_s_at | hs.443625 | COL3A1                                                                                    | collagen, type III, alpha 1 (Ehlers-Danlos syndrome type IV, autosomal dominant)          | 2,82 | 1,43 |
| 201852_x_at | hs.443625 | COL3A1                                                                                    | collagen, type III, alpha 1 (Ehlers-Danlos syndrome type IV, autosomal dominant)          | 2,70 | 1,43 |
| 213519_s_at | hs.200841 | LAMA2                                                                                     | laminin, alpha 2 (merosin, congenital muscular dystrophy)                                 | 2,41 | 1,43 |
| 218261_at   | hs.18894  | AP1M2                                                                                     | adaptor-related protein complex 1, mu 2 subunit                                           | 2,34 | 1,43 |
| 243231_at   | hs.658702 | FLJ39822                                                                                  | hypothetical protein FLJ39822                                                             | 2,26 | 1,43 |
| 218737_at   | hs.577403 | SBNO1                                                                                     | strawberry notch homolog 1 (Drosophila)                                                   | 2,24 | 1,43 |
| 222764_at   | hs.535326 | ASRGL1                                                                                    | asparaginase like 1                                                                       | 2,20 | 1,43 |
| 203453_at   | hs.591047 | SCNN1A                                                                                    | sodium channel, nonvoltage-gated 1 alpha                                                  | 2,08 | 1,43 |

|             |           |                                         |                                                                                                   |      |      |
|-------------|-----------|-----------------------------------------|---------------------------------------------------------------------------------------------------|------|------|
| 202223_at   | hs.504237 | STT3A                                   | STT3, subunit of the oligosaccharyltransferase complex, homolog A ( <i>S. cerevisiae</i> )        | 1,97 | 1,43 |
| 201545_s_at | hs.117176 | PABPN1                                  | poly(A) binding protein, nuclear 1                                                                | 1,94 | 1,43 |
| 213238_at   | hs.437241 | ATP10D                                  | ATPase, Class V, type 10D                                                                         | 1,90 | 1,43 |
| 240135_x_at | hs.644633 | TIMP3                                   | TIMP metalloproteinase inhibitor 3 (Sorsby fundus dystrophy, pseudoinflammatory)                  | 3,72 | 1,51 |
| 1555412_at  | hs.591275 | FBXL21                                  | F-box and leucine-rich repeat protein 21                                                          | 2,93 | 1,51 |
| 204090_at   | hs.654371 | STK19                                   | serine/threonine kinase 19                                                                        | 2,70 | 1,51 |
| 229004_at   | hs.534221 | CDNA FLJ26557<br>fis, clone<br>LNF01992 | CDNA FLJ26557 fis, clone LNF01992                                                                 | 2,55 | 1,51 |
| 202833_s_at | hs.525557 | SERPINA1                                | serpin peptidase inhibitor, clade A (alpha-1 antiproteinase, antitrypsin), member 1               | 2,45 | 1,51 |
| 207254_at   | hs.436893 | SLC15A1                                 | solute carrier family 15 (oligopeptide transporter), member 1                                     | 2,45 | 1,51 |
| 204070_at   | hs.17466  | RARRES3                                 | retinoic acid receptor responder (tazarotene induced) 3                                           | 2,45 | 1,51 |
| 225353_s_at | hs.467753 | C1QC                                    | complement component 1, q subcomponent, C chain                                                   | 2,41 | 1,51 |
| 203911_at   | hs.148178 | RAP1GAP                                 | RAP1 GTPase activating protein                                                                    | 2,21 | 1,51 |
| 210260_s_at | hs.656274 | TNFAIP8                                 | tumor necrosis factor, alpha-induced protein 8                                                    | 2,19 | 1,51 |
| 31637_s_at  | hs.724    | THRA                                    | thyroid hormone receptor, alpha (erythroblastic leukemia viral (v-erb-a) oncogene homolog, avian) | 2,10 | 1,51 |
| 209283_at   | hs.408767 | CRYAB                                   | crystallin, alpha B                                                                               | 1,97 | 1,51 |
| 226080_at   | hs.654754 | SSH2                                    | slingshot homolog 2 ( <i>Drosophila</i> )                                                         | 1,92 | 1,51 |
| 213677_s_at | hs.111749 | PMS1                                    | PMS1 postmeiotic segregation increased 1 ( <i>S. cerevisiae</i> )                                 | 1,83 | 1,51 |
| 208853_s_at | hs.567968 | CANX                                    | calnexin                                                                                          | 1,81 | 1,51 |
| 226623_at   | hs.499704 | PHYHIPL                                 | phytanoyl-CoA 2-hydroxylase interacting protein-like                                              | 4,87 | 1,96 |
| 205907_s_at | hs.94070  | OMD                                     | osteomodulin                                                                                      | 4,26 | 1,96 |
| 222124_at   | hs.420830 | HIF3A                                   | hypoxia inducible factor 3, alpha subunit                                                         | 3,53 | 1,96 |
| 206529_x_at | hs.571246 | SLC26A4                                 | solute carrier family 26, member 4                                                                | 3,15 | 1,96 |
| 229638_at   | hs.499205 | IRX3                                    | iroquois homeobox protein 3                                                                       | 2,72 | 1,96 |
| 243922_at   | ---       | ---                                     | Transcribed locus                                                                                 | 2,66 | 1,96 |
| 208451_s_at | hs.534847 | C4A                                     | complement component 4A (Rodgers blood group)                                                     | 2,49 | 1,96 |
| 231202_at   | hs.42572  | ALDH1L2                                 | aldehyde dehydrogenase 1 family, member L2                                                        | 2,41 | 1,96 |

|              |           |                           |                                                                                                             |      |      |
|--------------|-----------|---------------------------|-------------------------------------------------------------------------------------------------------------|------|------|
| 212298_at    | hs.131704 | NRP1                      | neuropilin 1                                                                                                | 2,39 | 1,96 |
| 231987_at    | hs.437437 | DKFZp586C0721             | Hypothetical protein LOC728264                                                                              | 2,39 | 1,96 |
| 235856_at    | hs.656152 | C4A                       | Transcribed locus, moderately similar to XP_001162191.1 complement component 4A isoform 2 [Pan troglodytes] | 2,37 | 1,96 |
| 239783_at    | hs.671399 | TRERF1                    | Transcribed locus                                                                                           | 2,35 | 1,96 |
| 216795_at    | hs.612922 | CDNA                      | CDNA: FLJ23194 fis, clone REC00490                                                                          | 2,33 | 1,96 |
| 224407_s_at  | hs.444247 | RP6-213H19.1              | serine/threonine protein kinase MST4                                                                        | 2,31 | 1,96 |
| 220831_at    | hs.272404 | GCNT4                     | glucosaminyl (N-acetyl) transferase 4, core 2 (beta-1,6-N-acetylglucosaminyltransferase)                    | 2,30 | 1,96 |
| 229007_at    | hs.582712 | LOC283788                 | hypothetical protein LOC283788                                                                              | 2,30 | 1,96 |
| 218983_at    | hs.631730 | C1RL                      | complement component 1, r subcomponent-like                                                                 | 2,27 | 1,96 |
| 235057_at    | hs.632272 | ITCH                      | itchy homolog E3 ubiquitin protein ligase (mouse)                                                           | 2,21 | 1,96 |
| 226436_at    | hs.522895 | RASSF4                    | Ras association (RalGDS/AF-6) domain family 4                                                               | 2,12 | 1,96 |
| 202185_at    | hs.153357 | PLOD3                     | procollagen-lysine, 2-oxoglutarate 5-dioxygenase 3                                                          | 2,09 | 1,96 |
| 222192_s_at  | hs.187823 | C2orf43                   | chromosome 2 open reading frame 43                                                                          | 2,08 | 1,96 |
| 228247_at    | hs.582712 | LOC283788                 | Hypothetical protein LOC283788                                                                              | 2,03 | 1,96 |
| 231034_s_at  | hs.652741 | Transcribed locus         | NHS-like 1                                                                                                  | 1,98 | 1,96 |
| 210868_s_at  | hs.412939 | ELOVL6                    | ELOVL family member 6, elongation of long chain fatty acids (FEN1/Elo2, SUR4/Elo3-like, yeast)              | 1,94 | 1,96 |
| 1552617_a_at | hs.523744 | RFWD2                     | ring finger and WD repeat domain 2                                                                          | 1,91 | 1,96 |
| 229983_at    | hs.58924  | TIGD2                     | tigger transposable element derived 2                                                                       | 1,91 | 1,96 |
| 1570298_at   | hs.577558 | Homo sapiens, clone IMAGE | Homo sapiens, clone IMAGE:4042783, mRNA                                                                     | 1,85 | 1,96 |
| 219002_at    | hs.529276 | FASTKD1                   | FAST kinase domains 1                                                                                       | 1,83 | 1,96 |
| 204451_at    | hs.94234  | FZD1                      | frizzled homolog 1 (Drosophila)                                                                             | 1,82 | 1,96 |
| 1554627_a_at | hs.500007 | ASCC1                     | activating signal cointegrator 1 complex subunit 1                                                          | 1,80 | 1,96 |
| 208813_at    | hs.500756 | GOT1                      | glutamic-oxaloacetic transaminase 1, soluble (aspartate aminotransferase 1)                                 | 1,78 | 1,96 |
| 212872_s_at  | hs.278434 | TRFP                      | Trf (TATA binding protein-related factor)-proximal homolog (Drosophila)                                     | 1,68 | 1,96 |
| 213993_at    | hs.654637 | SPON1                     | spondin 1, extracellular matrix protein                                                                     | 2,88 | 2,37 |
| 213119_at    | hs.269004 | SLC36A1                   | solute carrier family 36 (proton/amino acid symporter), member 1                                            | 2,78 | 2,37 |
| 213994_s_at  | hs.654637 | SPON1                     | spondin 1, extracellular matrix protein                                                                     | 2,59 | 2,37 |

|              |           |                                 |                                                                                     |      |      |
|--------------|-----------|---------------------------------|-------------------------------------------------------------------------------------|------|------|
| 219319_at    | hs.420830 | HIF3A                           | hypoxia inducible factor 3, alpha subunit                                           | 2,56 | 2,37 |
| 1555638_a_at | hs.570423 | SAMSN1                          | SAM domain, SH3 domain and nuclear localization signals 1                           | 2,56 | 2,37 |
| 225016_at    | hs.293274 | APCDD1                          | adenomatosis polyposis coli down-regulated 1                                        | 2,55 | 2,37 |
| 1562235_s_at | hs.685552 | PBX1                            | Transcribed locus                                                                   | 2,55 | 2,37 |
| 206171_at    | hs.281342 | ADORA3                          | adenosine A3 receptor                                                               | 2,46 | 2,37 |
| 1554899_s_at | hs.433300 | FCER1G                          | Fc fragment of IgE, high affinity I, receptor for; gamma polypeptide                | 2,46 | 2,37 |
| 226875_at    | hs.368203 | DOCK11                          | dedicator of cytokinesis 11                                                         | 2,40 | 2,37 |
| 239606_at    | hs.659886 | GCNT2                           | CDNA FLJ25345 fis, clone TST01118                                                   | 2,39 | 2,37 |
| 228377_at    | hs.446164 | KLHL14                          | kelch-like 14 (Drosophila)                                                          | 2,36 | 2,37 |
| 238067_at    | hs.351798 | TBC1D8B                         | TBC1 domain family, member 8B (with GRAM domain)                                    | 2,33 | 2,37 |
| 224175_s_at  | hs.125300 | TRIM34                          | tripartite motif-containing 34                                                      | 2,33 | 2,37 |
| 243252_at    | ---       | ---                             | ---                                                                                 | 2,31 | 2,37 |
| 236741_at    | hs.208067 | WDR72                           | WD repeat domain 72                                                                 | 2,30 | 2,37 |
| 238353_at    | hs.192131 | RASL11A                         | RAS-like, family 11, member A                                                       | 2,23 | 2,37 |
| 211429_s_at  | hs.525557 | SERPINA1                        | serpin peptidase inhibitor, clade A (alpha-1 antiproteinase, antitrypsin), member 1 | 2,15 | 2,37 |
| 1566265_at   | hs.638748 | Full length insert cDNA YQ80D07 | Full length insert cDNA YQ80D07                                                     | 2,14 | 2,37 |
| 1553500_at   | hs.591275 | FBXL21                          | F-box and leucine-rich repeat protein 21                                            | 2,12 | 2,37 |
| 65517_at     | hs.18894  | AP1M2                           | adaptor-related protein complex 1, mu 2 subunit                                     | 2,11 | 2,37 |
| 216320_x_at  | hs.512587 | MST1                            | macrophage stimulating 1 (hepatocyte growth factor-like)                            | 2,06 | 2,37 |
| 225526_at    | hs.44693  | MKLN1                           | muskelin 1, intracellular mediator containing kelch motifs                          | 2,03 | 2,37 |
| 223799_at    | hs.266782 | KIAA1826                        | KIAA1826                                                                            | 1,99 | 2,37 |
| 1557223_at   | hs.652427 | SDHAL2                          | succinate dehydrogenase complex, subunit A, flavoprotein pseudogene 2               | 1,99 | 2,37 |
| 241838_at    | hs.664732 | LOC644112                       | Transcribed locus                                                                   | 1,98 | 2,37 |
| 222843_at    | hs.137516 | FIGNL1                          | fidgetin-like 1                                                                     | 1,91 | 2,37 |
| 219330_at    | hs.515130 | VANGL1                          | vang-like 1 (van gogh, Drosophila)                                                  | 1,90 | 2,37 |
| 204871_at    | hs.532216 | MTERF                           | mitochondrial transcription termination factor                                      | 1,88 | 2,37 |
| 225517_at    | hs.5327   | ZNF770                          | zinc finger protein 770                                                             | 1,85 | 2,37 |

|              |           |          |                                                                                          |      |      |
|--------------|-----------|----------|------------------------------------------------------------------------------------------|------|------|
| 218897_at    | hs.439991 | MGC10993 | transmembrane protein 177                                                                | 1,85 | 2,37 |
| 201147_s_at  | hs.644633 | TIMP3    | TIMP metalloproteinase inhibitor 3 (Sorsby fundus dystrophy, pseudoinflammatory)         | 1,83 | 2,37 |
| 218373_at    | hs.380897 | FTS      | AKT interacting protein                                                                  | 1,82 | 2,37 |
| 219494_at    | hs.30561  | RAD54B   | RAD54 homolog B ( <i>S. cerevisiae</i> )                                                 | 1,81 | 2,37 |
| 223420_at    | hs.505676 | DNAJC14  | DnaJ (Hsp40) homolog, subfamily C, member 14                                             | 1,81 | 2,37 |
| 223515_s_at  | hs.653253 | COQ3     | coenzyme Q3 homolog, methyltransferase ( <i>S. cerevisiae</i> )                          | 1,79 | 2,37 |
| 222775_s_at  | hs.433439 | MRPL35   | mitochondrial ribosomal protein L35                                                      | 1,78 | 2,37 |
| 206483_at    | hs.591865 | LRRC6    | leucine rich repeat containing 6                                                         | 1,78 | 2,37 |
| 213346_at    | hs.398111 | C13orf27 | chromosome 13 open reading frame 27                                                      | 1,76 | 2,37 |
| 204056_s_at  | hs.130607 | MVK      | mevalonate kinase (mevalonic aciduria)                                                   | 1,75 | 2,37 |
| 203142_s_at  | hs.532091 | AP3B1    | adaptor-related protein complex 3, beta 1 subunit                                        | 1,73 | 2,37 |
| 205499_at    | hs.306339 | SRPX2    | sushi-repeat-containing protein, X-linked 2                                              | 2,97 | 2,66 |
| 202869_at    | hs.524760 | OAS1     | 2',5'-oligoadenylate synthetase 1, 40/46kDa                                              | 2,77 | 2,66 |
| 205547_s_at  | hs.632099 | TAGLN    | transgelin                                                                               | 2,58 | 2,66 |
| 202404_s_at  | hs.489142 | COL1A2   | collagen, type I, alpha 2                                                                | 2,57 | 2,66 |
| 218400_at    | hs.528634 | OAS3     | 2'-5'-oligoadenylate synthetase 3, 100kDa                                                | 2,45 | 2,66 |
| 1558215_s_at | hs.89781  | UBTF     | upstream binding transcription factor, RNA polymerase I                                  | 2,35 | 2,66 |
| 216840_s_at  | hs.200841 | LAMA2    | laminin, alpha 2 (merosin, congenital muscular dystrophy)                                | 2,35 | 2,66 |
| 219825_at    | hs.91546  | CYP26B1  | cytochrome P450, family 26, subfamily B, polypeptide 1                                   | 2,35 | 2,66 |
| 202803_s_at  | hs.375957 | ITGB2    | integrin, beta 2 (complement component 3 receptor 3 and 4 subunit)                       | 2,31 | 2,66 |
| 38487_at     | hs.301989 | STAB1    | stabilin 1                                                                               | 2,23 | 2,66 |
| 220047_at    | hs.50861  | SIRT4    | sirtuin (silent mating type information regulation 2 homolog) 4 ( <i>S. cerevisiae</i> ) | 2,07 | 2,66 |
| 203987_at    | hs.591863 | FZD6     | frizzled homolog 6 ( <i>Drosophila</i> )                                                 | 2,06 | 2,66 |
| 217528_at    | hs.241551 | CLCA2    | chloride channel, calcium activated, family member 2                                     | 2,05 | 2,66 |
| 236897_at    | hs.558512 | IL17RB   | CDNA FLJ37772 fis, clone BRHIP2025739                                                    | 2,04 | 2,66 |
| 1565666_s_at | hs.528432 | MUC6     | mucin 6, oligomeric mucus/gel-forming                                                    | 1,99 | 2,66 |
| 205614_x_at  | hs.512587 | MST1     | macrophage stimulating 1 (hepatocyte growth factor-like)                                 | 1,99 | 2,66 |



|              |           |                                             |                                                                                                                    |      |      |
|--------------|-----------|---------------------------------------------|--------------------------------------------------------------------------------------------------------------------|------|------|
| 241835_at    | hs.624519 | CDNA clone<br>IMAGE                         | CDNA clone IMAGE:4822225                                                                                           | 1,98 | 2,66 |
| 226365_at    | hs.659405 | SMA3                                        | CDNA FLJ40901 fis, clone UTERU2003704                                                                              | 1,98 | 2,66 |
| 38691_s_at   | hs.1074   | SFTPC                                       | surfactant, pulmonary-associated protein C                                                                         | 1,90 | 2,66 |
| 208691_at    | hs.529618 | TFRC                                        | transferrin receptor (p90, CD71)                                                                                   | 1,87 | 2,66 |
| 206486_at    | hs.409523 | LAG3                                        | lymphocyte-activation gene 3                                                                                       | 1,85 | 2,66 |
| 203817_at    | hs.77890  | GUCY1B3                                     | guanylate cyclase 1, soluble, beta 3                                                                               | 1,79 | 2,66 |
| 203340_s_at  | hs.470608 | SLC25A12                                    | solute carrier family 25 (mitochondrial carrier,<br>Aralar), member 12                                             | 1,78 | 2,66 |
| 227827_at    | hs.481342 | SORBS2                                      | CDNA clone IMAGE:4791597                                                                                           | 1,78 | 2,66 |
| 223324_s_at  | hs.512894 | TRPM7                                       | transient receptor potential cation channel, subfamily<br>M, member 7                                              | 1,77 | 2,66 |
| 203678_at    | hs.584863 | KIAA1018                                    | myotubularin related protein 15                                                                                    | 1,75 | 2,66 |
| 1554894_a_at | hs.659881 | PCBD2                                       | pterin-4 alpha-carbinolamine<br>dehydratase/dimerization cofactor of hepatocyte<br>nuclear factor 1 alpha (TCF1) 2 | 1,75 | 2,66 |
| 228041_at    | hs.104347 | AASDH                                       | 2-aminoadipic 6-semialdehyde dehydrogenase                                                                         | 1,73 | 2,66 |
| 224430_s_at  | hs.347614 | MTO1                                        | mitochondrial translation optimization 1 homolog (S.<br>cerevisiae)                                                | 1,71 | 2,66 |
| 203517_at    | hs.470728 | MTX2                                        | metaxin 2                                                                                                          | 1,66 | 2,66 |
| 235315_at    | hs.507916 | TSC22D1                                     | TSC22 domain family, member 1                                                                                      | 2,85 | 3,22 |
| 239860_at    | hs.656046 | DPYS                                        | LP2209                                                                                                             | 2,61 | 3,22 |
| 202203_s_at  | hs.295137 | AMFR                                        | autocrine motility factor receptor                                                                                 | 2,53 | 3,22 |
| 233880_at    | hs.195642 | C17orf27                                    | ring finger protein 213                                                                                            | 2,51 | 3,22 |
| 223806_s_at  | hs.512843 | NAPSA                                       | napsin A aspartic peptidase                                                                                        | 2,46 | 3,22 |
| 1554930_a_at | hs.654961 | FUT8                                        | fucosyltransferase 8 (alpha (1,6) fucosyltransferase)                                                              | 2,42 | 3,22 |
| 1556881_at   | hs.145555 | CDNA FLJ37235<br>fis, clone<br>BRAMY2002525 | Hypothetical protein LOC729967                                                                                     | 2,35 | 3,22 |
| 237546_at    | hs.602516 | Transcribed locus                           | Transcribed locus                                                                                                  | 2,33 | 3,22 |
| 226057_at    | hs.657263 | CDGAP                                       | Cdc42 GTPase-activating protein                                                                                    | 2,29 | 3,22 |
| 1553923_at   | hs.375139 | MGC34821                                    | hypothetical protein MGC34821                                                                                      | 2,23 | 3,22 |
| 243259_at    | hs.608404 | Transcribed locus                           | Transcribed locus                                                                                                  | 2,19 | 3,22 |
| 242483_at    | ---       | ---                                         | ---                                                                                                                | 2,10 | 3,22 |
| 231181_at    | hs.88651  | Transcribed locus                           | Transcribed locus                                                                                                  | 2,09 | 3,22 |

|              |           |                  |                                                                                                   |      |      |
|--------------|-----------|------------------|---------------------------------------------------------------------------------------------------|------|------|
| 202784_s_at  | hs.482043 | NNT              | nicotinamide nucleotide transhydrogenase                                                          | 2,09 | 3,22 |
| 244742_at    | hs.652123 | PAH              | phenylalanine hydroxylase                                                                         | 2,08 | 3,22 |
| 204570_at    | hs.421621 | COX7A1           | cytochrome c oxidase subunit VIIa polypeptide 1 (muscle)                                          | 2,06 | 3,22 |
| 242700_at    | hs.530077 | PON2             | paraoxonase 2                                                                                     | 2,06 | 3,22 |
| 213413_at    | hs.44385  | STON1            | stonin 1                                                                                          | 2,05 | 3,22 |
| 201251_at    | hs.534770 | PKM2             | pyruvate kinase, muscle                                                                           | 2,04 | 3,22 |
| 232139_s_at  | hs.667130 | KIAA1919         | KIAA1919                                                                                          | 2,04 | 3,22 |
| 231077_at    | hs.534593 | C1orf192         | chromosome 1 open reading frame 192                                                               | 2,02 | 3,22 |
| 231138_at    | hs.247868 | TRPC5            | CDNA clone IMAGE:4822062                                                                          | 2,01 | 3,22 |
| 228346_at    | hs.33983  | FLJ14959         | Transcribed locus                                                                                 | 2,00 | 3,22 |
| 214367_at    | hs.99491  | RASGRP2          | RAS guanyl releasing protein 2 (calcium and DAG-regulated)                                        | 2,00 | 3,22 |
| 238036_at    | ---       | ---              | ---                                                                                               | 1,98 | 3,22 |
| 1559030_a_at | hs.573419 | CDNA clone IMAGE | CDNA clone IMAGE:5295909                                                                          | 1,96 | 3,22 |
| 224474_x_at  | hs.516182 | SMEK2            | SMEK homolog 2, suppressor of mek1 (Dictyostelium)                                                | 1,95 | 3,22 |
| 1555882_at   | hs.522672 | SPIN3            | spindlin family, member 3                                                                         | 1,95 | 3,22 |
| 233133_at    | hs.672790 | PCLO             | Clone 24993 mRNA sequence                                                                         | 1,95 | 3,22 |
| 230986_at    | hs.646614 | KLF8             | Kruppel-like factor 8                                                                             | 1,92 | 3,22 |
| 1553972_a_at | hs.533013 | CBS              | cystathionine-beta-synthase                                                                       | 1,91 | 3,22 |
| 204092_s_at  | hs.250822 | AURKA            | aurora kinase A                                                                                   | 1,90 | 3,22 |
| 217757_at    | hs.212838 | A2M              | alpha-2-macroglobulin                                                                             | 1,87 | 3,22 |
| 202957_at    | hs.14601  | HCLS1            | hematopoietic cell-specific Lyn substrate 1                                                       | 1,86 | 3,22 |
| 200889_s_at  | hs.114033 | SSR1             | signal sequence receptor, alpha (translocon-associated protein alpha)                             | 1,86 | 3,22 |
| 204760_s_at  | hs.724    | THRA             | thyroid hormone receptor, alpha (erythroblastic leukemia viral (v-erb-a) oncogene homolog, avian) | 1,86 | 3,22 |
| 233442_at    | hs.659733 | PDZRN3           | CDNA FLJ12196 fis, clone MAMMA1000867                                                             | 1,86 | 3,22 |
| 235304_at    | hs.660423 | ZNF573           | Transcribed locus                                                                                 | 1,83 | 3,22 |
| 227689_at    | hs.371335 | ZNF227           | zinc finger protein 227                                                                           | 1,83 | 3,22 |
| 1568574_x_at | hs.313    | SPP1             | Secreted phosphoprotein 1 (osteopontin, bone sialoprotein I, early T-lymphocyte activation 1)     | 1,82 | 3,22 |
| 228946_at    | hs.391481 | PDZD6            | inturned planar cell polarity effector homolog (Drosophila)                                       | 1,81 | 3,22 |

|              |           |          |                                                                                          |      |      |
|--------------|-----------|----------|------------------------------------------------------------------------------------------|------|------|
| 214129_at    | hs.647804 | PDE4DIP  | similar to phosphodiesterase 4D interacting protein isoform 2                            | 1,80 | 3,22 |
| 1560981_a_at | hs.103110 | PPARA    | peroxisome proliferator-activated receptor alpha                                         | 1,79 | 3,22 |
| 213300_at    | hs.370671 | KIAA0404 | hypothetical protein LOC23130                                                            | 1,78 | 3,22 |
| 226897_s_at  | hs.371856 | ZC3H7A   | zinc finger CCCH-type containing 7A                                                      | 1,78 | 3,22 |
| 202511_s_at  | hs.486063 | ATG5     | ATG5 autophagy related 5 homolog (S. cerevisiae)                                         | 1,77 | 3,22 |
| 222613_at    | hs.302977 | C12orf4  | chromosome 12 open reading frame 4                                                       | 1,76 | 3,22 |
| 222805_at    | hs.533323 | MANEA    | mannosidase, endo-alpha                                                                  | 1,74 | 3,22 |
| 203088_at    | hs.332708 | FBLN5    | fibulin 5                                                                                | 1,74 | 3,22 |
| 228423_at    | hs.61271  | MAP9     | microtubule-associated protein 9                                                         | 1,73 | 3,22 |
| 208393_s_at  | hs.655835 | RAD50    | RAD50 homolog (S. cerevisiae)                                                            | 1,73 | 3,22 |
| 228168_at    | hs.429    | ATP5G3   | ATP synthase, H+ transporting, mitochondrial FO complex, subunit C3 (subunit 9)          | 1,72 | 3,22 |
| 214659_x_at  | hs.531111 | YLPM1    | YLP motif containing 1                                                                   | 1,71 | 3,22 |
| 203039_s_at  | hs.471207 | NDUFS1   | NADH dehydrogenase (ubiquinone) Fe-S protein 1, 75kDa (NADH-coenzyme Q reductase)        | 1,71 | 3,22 |
| 225621_at    | hs.40919  | ALG2     | asparagine-linked glycosylation 2 homolog (S. cerevisiae, alpha-1,3-mannosyltransferase) | 1,70 | 3,22 |
| 201150_s_at  | hs.644633 | TIMP3    | TIMP metalloproteinase inhibitor 3 (Sorsby fundus dystrophy, pseudoinflammatory)         | 1,69 | 3,22 |
| 237158_s_at  | hs.577404 | MPHOSPH9 | M-phase phosphoprotein 9                                                                 | 1,69 | 3,22 |
| 201413_at    | hs.406861 | HSD17B4  | hydroxysteroid (17-beta) dehydrogenase 4                                                 | 1,67 | 3,22 |
| 205442_at    | hs.178121 | MFAP3L   | microfibrillar-associated protein 3-like                                                 | 1,67 | 3,22 |
| 227447_at    | hs.274531 | SKIV2L2  | superkiller viralicidic activity 2-like 2 (S. cerevisiae)                                | 1,67 | 3,22 |
| 212333_at    | hs.468140 | FAM98A   | family with sequence similarity 98, member A                                             | 1,64 | 3,22 |
| 202358_s_at  | hs.444024 | SNX19    | sorting nexin 19                                                                         | 1,61 | 3,22 |
| 209612_s_at  | hs.4      | ADH1B    | alcohol dehydrogenase IB (class I), beta polypeptide                                     | 3,79 | 3,57 |
| 208470_s_at  | hs.655361 | HP       | haptoglobin                                                                              | 3,14 | 3,57 |
| 232654_s_at  | hs.654499 | UGT1A6   | UDP glucuronosyltransferase 1 family, polypeptide A6                                     | 3,10 | 3,57 |
| 1554027_a_at | hs.5462   | SLC4A4   | solute carrier family 4, sodium bicarbonate cotransporter, member 4                      | 2,79 | 3,57 |
| 44673_at     | hs.31869  | SIGLEC1  | sialic acid binding Ig-like lectin 1, sialoadhesin                                       | 2,70 | 3,57 |
| 206799_at    | hs.204096 | SCGB1D2  | secretoglobin, family 1D, member 2                                                       | 2,61 | 3,57 |
| 222668_at    | hs.221873 | KCTD15   | potassium channel tetramerisation domain                                                 | 2,51 | 3,57 |

|              |           |           |                                                                                     |      |      |
|--------------|-----------|-----------|-------------------------------------------------------------------------------------|------|------|
|              |           |           | containing 15                                                                       |      |      |
| 231187_at    | hs.459187 | SLC28A1   | solute carrier family 28 (sodium-coupled nucleoside transporter), member 1          | 2,45 | 3,57 |
| 1555724_s_at | hs.632099 | TAGLN     | transgelin                                                                          | 2,45 | 3,57 |
| 200974_at    | hs.500483 | ACTA2     | actin, alpha 2, smooth muscle, aorta                                                | 2,40 | 3,57 |
| 209569_x_at  | hs.518595 | D4S234E   | DNA segment on chromosome 4 (unique) 234 expressed sequence                         | 2,40 | 3,57 |
| 1554337_at   | hs.657318 | FARP2     | FERM, RhoGEF and pleckstrin domain protein 2                                        | 2,37 | 3,57 |
| 230318_at    | hs.525557 | SERPINA1  | Serpin peptidase inhibitor, clade A (alpha-1 antiproteinase, antitrypsin), member 1 | 2,29 | 3,57 |
| 220330_s_at  | hs.570423 | SAMSN1    | SAM domain, SH3 domain and nuclear localization signals 1                           | 2,27 | 3,57 |
| 220543_at    | hs.517235 | C21orf62  | chromosome 21 open reading frame 62                                                 | 2,21 | 3,57 |
| 206205_at    | hs.577404 | MPHOSPH9  | M-phase phosphoprotein 9                                                            | 2,19 | 3,57 |
| 200825_s_at  | hs.277704 | HYOU1     | hypoxia up-regulated 1                                                              | 2,17 | 3,57 |
| 238270_x_at  | ---       | ---       | ---                                                                                 | 2,14 | 3,57 |
| 1563243_at   | hs.684578 | DGCR5     | MRNA; cDNA DKFZp434M242 (from clone DKFZp434M242)                                   | 2,14 | 3,57 |
| 206091_at    | hs.656199 | MATN3     | matrilin 3                                                                          | 2,13 | 3,57 |
| 209070_s_at  | hs.24950  | RGS5      | regulator of G-protein signalling 5                                                 | 2,12 | 3,57 |
| 202008_s_at  | hs.356624 | NID1      | nidogen 1                                                                           | 2,09 | 3,57 |
| 214428_x_at  | hs.655564 | C4A       | complement component 4A (Rodgers blood group)                                       | 2,09 | 3,57 |
| 204389_at    | hs.183109 | MAOA      | monoamine oxidase A                                                                 | 2,08 | 3,57 |
| 203252_at    | hs.523835 | CDK2AP2   | CDK2-associated protein 2                                                           | 2,05 | 3,57 |
| 209641_s_at  | hs.463421 | ABCC3     | ATP-binding cassette, sub-family C (CFTR/MRP), member 3                             | 2,04 | 3,57 |
| 208079_s_at  | hs.250822 | AURKA     | aurora kinase A                                                                     | 2,03 | 3,57 |
| 223229_at    | hs.5199   | UBE2T     | ubiquitin-conjugating enzyme E2T (putative)                                         | 2,03 | 3,57 |
| 1555214_a_at | hs.143929 | CLEC7A    | C-type lectin domain family 7, member A                                             | 2,02 | 3,57 |
| 1570585_at   | hs.15396  | LOC196264 | hypothetical protein LOC196264                                                      | 2,02 | 3,57 |
| 1552621_at   | hs.654726 | POLR2J2   | DNA directed RNA polymerase II polypeptide J-related                                | 2,01 | 3,57 |
| 210587_at    | hs.632713 | INHBE     | inhibin, beta E                                                                     | 1,99 | 3,57 |
| 218022_at    | hs.443330 | VRK3      | vaccinia related kinase 3                                                           | 1,97 | 3,57 |

|              |           |                     |                                                                                                                          |      |      |
|--------------|-----------|---------------------|--------------------------------------------------------------------------------------------------------------------------|------|------|
| 35974_at     | hs.124922 | LRMP                | lymphoid-restricted membrane protein                                                                                     | 1,97 | 3,57 |
| 242172_at    | hs.526754 | MEIS1               | Meis homeobox 1                                                                                                          | 1,91 | 3,57 |
| 1563389_at   | hs.598812 | CDNA clone<br>IMAGE | CDNA clone IMAGE:4836780                                                                                                 | 1,90 | 3,57 |
| 213289_at    | hs.656884 | SATL1               | Transcribed locus, strongly similar to XP_001147416.1 spermidine/spermine N1-acetyl transferase-like 1 [Pan troglodytes] | 1,88 | 3,57 |
| 222586_s_at  | hs.477440 | OSBPL11             | oxysterol binding protein-like 11                                                                                        | 1,88 | 3,57 |
| 1553764_a_at | hs.655832 | JUB                 | jub, ajuba homolog (Xenopus laevis)                                                                                      | 1,87 | 3,57 |
| 221244_s_at  | ---       | ---                 | ---                                                                                                                      | 1,86 | 3,57 |
| 225929_s_at  | hs.195642 | C17orf27            | ring finger protein 213                                                                                                  | 1,86 | 3,57 |
| 1553559_at   | hs.162246 | TMEM171             | transmembrane protein 171                                                                                                | 1,86 | 3,57 |
| 200052_s_at  | hs.75117  | ILF2                | interleukin enhancer binding factor 2, 45kDa                                                                             | 1,86 | 3,57 |
| 224313_at    | hs.524009 | AASDHPPT            | Amino adipate-semialdehyde dehydrogenase-phosphopantetheinyl transferase                                                 | 1,86 | 3,57 |
| 210830_s_at  | hs.530077 | PON2                | paraoxonase 2                                                                                                            | 1,84 | 3,57 |
| 226041_at    | hs.324271 | NAPE-PLD            | N-acyl-phosphatidylethanolamine-hydrolyzing phospholipase D                                                              | 1,82 | 3,57 |
| 215792_s_at  | hs.462640 | DNAJC11             | DnaJ (Hsp40) homolog, subfamily C, member 11                                                                             | 1,82 | 3,57 |
| 230026_at    | hs.421848 | MRPL43              | mitochondrial ribosomal protein L43                                                                                      | 1,82 | 3,57 |
| 220865_s_at  | hs.558468 | PDSS1               | prenyl (decaprenyl) diphosphate synthase, subunit 1                                                                      | 1,81 | 3,57 |
| 219016_at    | ---       | FASTKD5             | FAST kinase domains 5                                                                                                    | 1,81 | 3,57 |
| 230848_s_at  | hs.187569 | MGA                 | MAX gene associated                                                                                                      | 1,80 | 3,57 |
| 242770_at    | hs.640156 | LOC642236           | CDNA FLJ44826 fis, clone BRACE3046762                                                                                    | 1,80 | 3,57 |
| 238621_at    | hs.657649 | FMN1                | formin 1                                                                                                                 | 1,80 | 3,57 |
| 226855_at    | hs.632214 | PDP2                | CDNA FLJ40954 fis, clone UTERU2010525                                                                                    | 1,79 | 3,57 |
| 205342_s_at  | hs.436123 | SULT1C2             | sulfotransferase family, cytosolic, 1C, member 2                                                                         | 1,78 | 3,57 |
| 218589_at    | hs.123464 | P2RY5               | purinergic receptor P2Y, G-protein coupled, 5                                                                            | 1,76 | 3,57 |
| 239289_x_at  | hs.584863 | KIAA1018            | myotubularin related protein 15                                                                                          | 1,75 | 3,57 |
| 205705_at    | hs.361041 | ANKRD26             | ankyrin repeat domain 26                                                                                                 | 1,75 | 3,57 |
| 213186_at    | hs.409210 | DZIP3               | zinc finger DAZ interacting protein 3                                                                                    | 1,75 | 3,57 |
| 209778_at    | hs.654511 | TRIP11              | thyroid hormone receptor interactor 11                                                                                   | 1,75 | 3,57 |
| 227431_at    | hs.72451  | CDNA clone<br>IMAGE | CDNA clone IMAGE:4791585                                                                                                 | 1,74 | 3,57 |

|             |           |                   |                                                                                         |      |      |
|-------------|-----------|-------------------|-----------------------------------------------------------------------------------------|------|------|
| 222569_at   | hs.34180  | UGCGL1            | UDP-glucose ceramide glucosyltransferase-like 1                                         | 1,73 | 3,57 |
| 236066_at   | hs.560741 | Transcribed locus | Transcribed locus                                                                       | 1,73 | 3,57 |
| 231929_at   | hs.604950 | Transcribed locus | IKAROS family zinc finger 2 (Helios)                                                    | 1,72 | 3,57 |
| 226749_at   | hs.590900 | MRPS9             | mitochondrial ribosomal protein S9                                                      | 1,70 | 3,57 |
| 212798_s_at | hs.157378 | ANKMY2            | ankyrin repeat and MYND domain containing 2                                             | 1,68 | 3,57 |
| 201821_s_at | hs.20716  | TIMM17A           | translocase of inner mitochondrial membrane 17 homolog A (yeast)                        | 1,68 | 3,57 |
| 209147_s_at | hs.435122 | PPAP2A            | phosphatidic acid phosphatase type 2A                                                   | 1,68 | 3,57 |
| 236966_at   | hs.266826 | ARMC8             | armadillo repeat containing 8                                                           | 1,67 | 3,57 |
| 212749_s_at | hs.48297  | RCHY1             | ring finger and CHY zinc finger domain containing 1                                     | 1,67 | 3,57 |
| 232515_at   | ---       | ---               | ---                                                                                     | 1,67 | 3,57 |
| 219146_at   | hs.317340 | C17orf42          | chromosome 17 open reading frame 42                                                     | 1,65 | 3,57 |
| 203484_at   | hs.488282 | SEC61G            | Sec61 gamma subunit                                                                     | 1,64 | 3,57 |
| 212893_at   | hs.480506 | ZZZ3              | zinc finger, ZZ-type containing 3                                                       | 1,63 | 3,57 |
| 217492_s_at | hs.500466 | PTEN              | phosphatase and tensin homolog (mutated in multiple advanced cancers 1)                 | 1,62 | 3,57 |
| 217832_at   | hs.571177 | SYNCRIP           | synaptotagmin binding, cytoplasmic RNA interacting protein                              | 1,62 | 3,57 |
| 230668_at   | hs.46627  | C20orf58          | chromosome 20 open reading frame 58                                                     | 2,92 | 4,08 |
| 241759_at   | hs.255479 | ADA               | Hypothetical protein MGC5566                                                            | 2,55 | 4,08 |
| 222608_s_at | hs.62180  | ANLN              | anillin, actin binding protein                                                          | 2,51 | 4,08 |
| 211806_s_at | hs.411299 | KCNJ15            | potassium inwardly-rectifying channel, subfamily J, member 15                           | 2,38 | 4,08 |
| 203325_s_at | hs.210283 | COL5A1            | collagen, type V, alpha 1                                                               | 2,31 | 4,08 |
| 222940_at   | hs.479898 | SULT1E1           | sulfotransferase family 1E, estrogen-preferring, member 1                               | 2,31 | 4,08 |
| 205804_s_at | hs.147434 | TRAF3IP3          | TRAF3 interacting protein 3                                                             | 2,26 | 4,08 |
| 223599_at   | ---       | TRIM6             | tripartite motif-containing 6                                                           | 2,24 | 4,08 |
| 211875_x_at | ---       | PCDHGA10          | protocadherin gamma subfamily A, 10                                                     | 2,24 | 4,08 |
| 228532_at   | hs.288010 | C1orf162          | chromosome 1 open reading frame 162                                                     | 2,24 | 4,08 |
| 231150_at   | hs.605338 | Transcribed locus | Transcribed locus                                                                       | 2,19 | 4,08 |
| 236361_at   | hs.411308 | GALNTL2           | UDP-N-acetyl-alpha-D-galactosamine:polypeptide N-acetylgalactosaminyltransferase-like 2 | 2,10 | 4,08 |

|             |           |                                                              |                                                                                  |      |      |
|-------------|-----------|--------------------------------------------------------------|----------------------------------------------------------------------------------|------|------|
| 219344_at   | hs.438419 | SLC29A3                                                      | solute carrier family 29 (nucleoside transporters), member 3                     | 2,09 | 4,08 |
| 204174_at   | hs.507658 | ALOX5AP                                                      | arachidonate 5-lipoxygenase-activating protein                                   | 2,07 | 4,08 |
| 209424_s_at | hs.508343 | AMACR                                                        | alpha-methylacyl-CoA racemase                                                    | 2,05 | 4,08 |
| 226630_at   | hs.437941 | C14orf106                                                    | chromosome 14 open reading frame 106                                             | 2,03 | 4,08 |
| 236882_at   | hs.660179 | PON2                                                         | Transcribed locus                                                                | 1,99 | 4,08 |
| 244638_at   | ---       | ---                                                          | ---                                                                              | 1,98 | 4,08 |
| 1562828_at  | hs.385502 | CDNA clone IMAGE                                             | CDNA clone IMAGE:4799094                                                         | 1,97 | 4,08 |
| 211422_at   | hs.47288  | TRPM3                                                        | transient receptor potential cation channel, subfamily M, member 3               | 1,94 | 4,08 |
| 228724_at   | hs.594267 | CDNA clone IMAGE                                             | CDNA clone IMAGE:5312516                                                         | 1,94 | 4,08 |
| 1569895_at  | hs.307652 | Homo sapiens, clone IMAGE                                    | Homo sapiens, clone IMAGE:4401848, mRNA                                          | 1,93 | 4,08 |
| 204674_at   | hs.124922 | LRMP                                                         | lymphoid-restricted membrane protein                                             | 1,92 | 4,08 |
| 215597_x_at | hs.670533 | MYST4                                                        | CDNA FLJ11353 fis, clone HEMBA1000042                                            | 1,92 | 4,08 |
| 1554121_at  | hs.132513 | HSD17B12                                                     | hydroxysteroid (17-beta) dehydrogenase 12                                        | 1,91 | 4,08 |
| 220357_s_at | hs.300863 | SGK2                                                         | serum/glucocorticoid regulated kinase 2                                          | 1,90 | 4,08 |
| 223172_s_at | hs.656909 | MTP18                                                        | mitochondrial protein 18 kDa                                                     | 1,89 | 4,08 |
| 235357_at   | hs.162868 | DPF3                                                         | D4, zinc and double PHD fingers, family 3                                        | 1,89 | 4,08 |
| 217617_at   | hs.663061 | PBX1                                                         | Transcribed locus                                                                | 1,89 | 4,08 |
| 219209_at   | hs.163173 | IFIH1                                                        | interferon induced with helicase C domain 1                                      | 1,87 | 4,08 |
| 223751_x_at | hs.120551 | TLR10                                                        | toll-like receptor 10                                                            | 1,87 | 4,08 |
| 234157_at   | hs.677333 | WDFY1                                                        | CDNA: FLJ21537 fis, clone COL06145                                               | 1,87 | 4,08 |
| 241368_at   | hs.131034 | Transcribed locus, strongly similar to XP_496282.1 PREDICTED | lipid storage droplet protein 5                                                  | 1,86 | 4,08 |
| 1559009_at  | hs.510068 | Homo sapiens, clone IMAGE                                    | Homo sapiens, clone IMAGE:5745274, mRNA                                          | 1,86 | 4,08 |
| 221498_at   | hs.192326 | SNX27                                                        | sorting nexin family member 27                                                   | 1,86 | 4,08 |
| 209498_at   | hs.512682 | CEACAM1                                                      | carcinoembryonic antigen-related cell adhesion molecule 1 (biliary glycoprotein) | 1,85 | 4,08 |

|              |           |                           |                                                       |      |      |
|--------------|-----------|---------------------------|-------------------------------------------------------|------|------|
| 200939_s_at  | hs.463041 | RERE                      | arginine-glutamic acid dipeptide (RE) repeats         | 1,85 | 4,08 |
| 1562352_at   | hs.639358 | Homo sapiens, clone IMAGE | Homo sapiens, clone IMAGE:5760997, mRNA               | 1,84 | 4,08 |
| 232928_at    | hs.663008 | FARP1                     | CDNA: FLJ21688 fis, clone COL09457                    | 1,84 | 4,08 |
| 228549_at    | ---       | ---                       | ---                                                   | 1,84 | 4,08 |
| 226459_at    | hs.310456 | PIK3AP1                   | phosphoinositide-3-kinase adaptor protein 1           | 1,83 | 4,08 |
| 212979_s_at  | hs.406492 | KIAA0738                  | KIAA0738 gene product                                 | 1,83 | 4,08 |
| 226310_at    | hs.407926 | RICTOR                    | rapamycin-insensitive companion of mTOR               | 1,82 | 4,08 |
| 229370_at    | ---       | ---                       | ---                                                   | 1,82 | 4,08 |
| 225675_at    | hs.497253 | C14orf101                 | chromosome 14 open reading frame 101                  | 1,80 | 4,08 |
| 232038_at    | hs.121396 | C6orf170                  | chromosome 6 open reading frame 170                   | 1,79 | 4,08 |
| 205440_s_at  | hs.519057 | NPY1R                     | neuropeptide Y receptor Y1                            | 1,79 | 4,08 |
| 224987_at    | hs.433381 | C6orf89                   | chromosome 6 open reading frame 89                    | 1,79 | 4,08 |
| 233856_at    | hs.675464 | FHOD3                     | CDNA FLJ10536 fis, clone NT2RP2001094                 | 1,78 | 4,08 |
| 244749_at    | hs.659259 | FAM111B                   | Homo sapiens, clone IMAGE:5218412, mRNA               | 1,78 | 4,08 |
| 241755_at    | hs.592048 | UQCRC2                    | Ubiquinol-cytochrome c reductase core protein II      | 1,77 | 4,08 |
| 212545_s_at  | hs.380133 | ZHX3                      | zinc fingers and homeoboxes 3                         | 1,77 | 4,08 |
| 204589_at    | hs.524692 | NUAK1                     | NUAK family, SNF1-like kinase, 1                      | 1,77 | 4,08 |
| 215731_s_at  | hs.577404 | MPHOSPH9                  | M-phase phosphoprotein 9                              | 1,75 | 4,08 |
| 1552921_a_at | hs.137516 | FIGNL1                    | fidgetin-like 1                                       | 1,75 | 4,08 |
| 229240_at    | hs.649522 | ZDHHC21                   | Zinc finger, DHHC-type containing 21                  | 1,74 | 4,08 |
| 205706_s_at  | hs.361041 | ANKRD26                   | ankyrin repeat domain 26                              | 1,74 | 4,08 |
| 1556555_at   | hs.131700 | LOC648768                 | CDNA clone IMAGE:4825327                              | 1,74 | 4,08 |
| 228042_at    | hs.99884  | ADPRH                     | ADP-ribosylarginine hydrolase                         | 1,73 | 4,08 |
| 237706_at    | hs.35199  | STXBP4                    | Syntaxin binding protein 4                            | 1,71 | 4,08 |
| 213462_at    | hs.156832 | NPAS2                     | neuronal PAS domain protein 2                         | 1,71 | 4,08 |
| 228595_at    | hs.655222 | HSD17B1                   | hydroxysteroid (17-beta) dehydrogenase 1              | 1,71 | 4,08 |
| 235438_at    | hs.657330 | CYP7B1                    | MRNA; cDNA DKFZp686E22185 (from clone DKFZp686E22185) | 1,70 | 4,08 |
| 212793_at    | hs.652207 | DAAM2                     | dishevelled associated activator of morphogenesis 2   | 1,70 | 4,08 |
| 208979_at    | hs.368971 | NCOA6                     | nuclear receptor coactivator 6                        | 1,70 | 4,08 |
| 209157_at    | hs.368078 | DNAJA2                    | DnaJ (Hsp40) homolog, subfamily A, member 2           | 1,70 | 4,08 |
| 200599_s_at  | hs.192374 | HSP90B1                   | heat shock protein 90kDa beta (Grp94), member 1       | 1,69 | 4,08 |
| 227575_s_at  | hs.528131 | C14orf102                 | chromosome 14 open reading frame 102                  | 1,68 | 4,08 |



|             |           |                   |                                                                             |      |      |
|-------------|-----------|-------------------|-----------------------------------------------------------------------------|------|------|
| 228320_x_at | hs.369763 | CCDC64            | coiled-coil domain containing 64                                            | 1,68 | 4,08 |
| 228316_at   | hs.468590 | FLJ31438          | hypothetical protein FLJ31438                                               | 1,68 | 4,08 |
| 223253_at   | hs.563491 | EPDR1             | ependymin related protein 1 (zebrafish)                                     | 1,67 | 4,08 |
| 228334_x_at | hs.555989 | KIAA1712          | KIAA1712                                                                    | 1,66 | 4,08 |
| 207821_s_at | hs.395482 | PTK2              | PTK2 protein tyrosine kinase 2                                              | 1,65 | 4,08 |
| 233759_s_at | hs.516182 | SMEK2             | SMEK homolog 2, suppressor of mek1 (Dictyostelium)                          | 1,62 | 4,08 |
| 218195_at   | hs.15929  | C6orf211          | chromosome 6 open reading frame 211                                         | 1,61 | 4,08 |
| 206958_s_at | hs.533855 | UPF3A             | UPF3 regulator of nonsense transcripts homolog A (yeast)                    | 1,60 | 4,08 |
| 204053_x_at | hs.500466 | PTEN              | phosphatase and tensin homolog (mutated in multiple advanced cancers 1)     | 1,60 | 4,08 |
| 218202_x_at | hs.203559 | MRPL44            | mitochondrial ribosomal protein L44                                         | 1,60 | 4,08 |
| 209316_s_at | hs.378532 | HBS1L             | HBS1-like (S. cerevisiae)                                                   | 1,59 | 4,08 |
| 212896_at   | hs.274531 | SKIV2L2           | superkiller viralicidic activity 2-like 2 (S. cerevisiae)                   | 1,58 | 4,08 |
| 223208_at   | hs.524731 | KCTD10            | potassium channel tetramerisation domain containing 10                      | 1,58 | 4,08 |
| 200842_s_at | hs.497788 | EPRS              | glutamyl-prolyl-tRNA synthetase                                             | 1,58 | 4,08 |
| 211652_s_at | hs.154078 | LBP               | lipopolysaccharide binding protein                                          | 2,86 | 4,73 |
| 1569568_at  | hs.686193 | PISD              | Homo sapiens, Similar to neuronal thread protein, clone IMAGE:3932744, mRNA | 2,52 | 4,73 |
| 227941_at   | hs.252433 | LOC339803         | hypothetical protein LOC339803                                              | 2,37 | 4,73 |
| 202236_s_at | hs.75231  | SLC16A1           | solute carrier family 16, member 1 (monocarboxylic acid transporter 1)      | 2,30 | 4,73 |
| 227183_at   | hs.519666 | DKFZp586C0721     | CDNA FLJ36638 fis, clone TRACH2018950                                       | 2,28 | 4,73 |
| 205303_at   | hs.102308 | KCNJ8             | potassium inwardly-rectifying channel, subfamily J, member 8                | 2,23 | 4,73 |
| 210119_at   | hs.411299 | KCNJ15            | potassium inwardly-rectifying channel, subfamily J, member 15               | 2,23 | 4,73 |
| 235885_at   | hs.591281 | P2RY12            | purinergic receptor P2Y, G-protein coupled, 12                              | 2,16 | 4,73 |
| 243142_at   | hs.600287 | Transcribed locus | Transcribed locus                                                           | 2,15 | 4,73 |
| 228547_at   | hs.637685 | NRXN1             | neurexin 1                                                                  | 2,13 | 4,73 |
| 219934_s_at | hs.479898 | SULT1E1           | sulfotransferase family 1E, estrogen-preferring, member 1                   | 2,13 | 4,73 |
| 205148_s_at | hs.495674 | CLCN4             | chloride channel 4                                                          | 2,08 | 4,73 |
| 208885_at   | hs.381099 | LCP1              | lymphocyte cytosolic protein 1 (L-plastin)                                  | 2,03 | 4,73 |

|              |           |                   |                                                                                                                          |      |      |
|--------------|-----------|-------------------|--------------------------------------------------------------------------------------------------------------------------|------|------|
| 204232_at    | hs.433300 | FCER1G            | Fc fragment of IgE, high affinity I, receptor for; gamma polypeptide                                                     | 1,98 | 4,73 |
| 206927_s_at  | hs.654555 | GUCY1A2           | guanylate cyclase 1, soluble, alpha 2                                                                                    | 1,95 | 4,73 |
| 238246_at    | hs.145932 | MTL5              | Metallothionein-like 5, testis-specific (tesmin)                                                                         | 1,94 | 4,73 |
| 214912_at    | ---       | ---               | ---                                                                                                                      | 1,94 | 4,73 |
| 1554797_at   | hs.404139 | SYT16             | synaptotagmin XVI                                                                                                        | 1,93 | 4,73 |
| 204388_s_at  | hs.183109 | MAOA              | monoamine oxidase A                                                                                                      | 1,92 | 4,73 |
| 212240_s_at  | hs.132225 | PIK3R1            | phosphoinositide-3-kinase, regulatory subunit 1 (p85 alpha)                                                              | 1,89 | 4,73 |
| 232271_at    | hs.241529 | HNF4G             | hepatocyte nuclear factor 4, gamma                                                                                       | 1,89 | 4,73 |
| 239313_at    | hs.561708 | LOC401320         | Hypothetical LOC401320                                                                                                   | 1,83 | 4,73 |
| 1554217_a_at | hs.222282 | FLJ20097          | coiled-coil domain containing 132                                                                                        | 1,80 | 4,73 |
| 207400_at    | hs.598503 | NPY5R             | neuropeptide Y receptor Y5                                                                                               | 1,80 | 4,73 |
| 211964_at    | hs.508716 | COL4A2            | collagen, type IV, alpha 2                                                                                               | 1,80 | 4,73 |
| 1557132_at   | hs.532056 | WDR17             | WD repeat domain 17                                                                                                      | 1,78 | 4,73 |
| 212174_at    | hs.470907 | AK2               | adenylate kinase 2                                                                                                       | 1,78 | 4,73 |
| 216170_at    | hs.677343 | EEF1G             | CDNA: FLJ21618 fis, clone COL07487                                                                                       | 1,76 | 4,73 |
| 213282_at    | hs.656884 | SATL1             | Transcribed locus, strongly similar to XP_001147416.1 spermidine/spermine N1-acetyl transferase-like 1 [Pan troglodytes] | 1,75 | 4,73 |
| 239710_at    | hs.118769 | Transcribed locus | Transcribed locus                                                                                                        | 1,74 | 4,73 |
| 1568873_at   | hs.352635 | ZNF519            | zinc finger protein 519                                                                                                  | 1,73 | 4,73 |
| 227461_at    | hs.14248  | STON2             | stonin 2                                                                                                                 | 1,73 | 4,73 |
| 210962_s_at  | hs.651221 | AKAP9             | A kinase (PRKA) anchor protein (yotiao) 9                                                                                | 1,73 | 4,73 |
| 235520_at    | hs.308418 | SUHW3             | suppressor of hairy wing homolog 3 (Drosophila)                                                                          | 1,73 | 4,73 |
| 227813_at    | hs.479971 | THAP6             | THAP domain containing 6                                                                                                 | 1,73 | 4,73 |
| 225187_at    | hs.654720 | KIAA1967          | KIAA1967                                                                                                                 | 1,72 | 4,73 |
| 221449_s_at  | hs.42217  | ITFG1             | integrin alpha FG-GAP repeat containing 1                                                                                | 1,70 | 4,73 |
| 236587_at    | hs.597536 | Transcribed locus | Transcribed locus                                                                                                        | 1,65 | 4,73 |
| 218257_s_at  | hs.34180  | UGCG1             | UDP-glucose ceramide glucosyltransferase-like 1                                                                          | 1,64 | 4,73 |
| 203079_s_at  | hs.82919  | CUL2              | cullin 2                                                                                                                 | 1,63 | 4,73 |
| 218783_at    | hs.369285 | INTS7             | integrator complex subunit 7                                                                                             | 1,62 | 4,73 |
| 229501_s_at  | hs.644563 | USP8              | Ubiquitin specific peptidase 8                                                                                           | 1,59 | 4,73 |
| 223894_s_at  | hs.380897 | FTS               | AKT interacting protein                                                                                                  | 1,56 | 4,73 |

|                                                                                                     |           |                   |                                                                        |       |      |
|-----------------------------------------------------------------------------------------------------|-----------|-------------------|------------------------------------------------------------------------|-------|------|
| 212260_at                                                                                           | hs.565319 | TNRC15            | trinucleotide repeat containing 15                                     | 1,56  | 4,73 |
| 212261_at                                                                                           | hs.565319 | TNRC15            | trinucleotide repeat containing 15                                     | 1,52  | 4,73 |
| 226159_at                                                                                           | hs.29899  | LOC285636         | hypothetical protein LOC285636                                         | 1,51  | 4,73 |
| <b>Probe sets lower expressed in deceased compared to living donor implantation kidneys (N=453)</b> |           |                   |                                                                        |       |      |
| 1552455_at                                                                                          | hs.676039 | C9orf65           | prune homolog 2 (Drosophila)                                           | -2,07 | 0,00 |
| 223234_at                                                                                           | hs.19400  | MAD2L2            | MAD2 mitotic arrest deficient-like 2 (yeast)                           | -2,22 | 0,00 |
| 203349_s_at                                                                                         | hs.43697  | ETV5              | ets variant gene 5 (ets-related molecule)                              | -2,32 | 0,00 |
| 206781_at                                                                                           | hs.172847 | DNAJC4            | DnaJ (Hsp40) homolog, subfamily C, member 4                            | -2,55 | 0,00 |
| 230102_at                                                                                           | hs.43697  | ETV5              | Ets variant gene 5 (ets-related molecule)                              | -2,75 | 0,00 |
| 226328_at                                                                                           | hs.136280 | KLF16             | Kruppel-like factor 16                                                 | -2,85 | 0,00 |
| 227015_at                                                                                           | hs.567547 | ASPHD2            | aspartate beta-hydroxylase domain containing 2                         | -2,87 | 0,00 |
| 212063_at                                                                                           | hs.502328 | CD44              | CD44 molecule (Indian blood group)                                     | -2,88 | 0,00 |
| 205837_s_at                                                                                         | hs.434973 | GYPA              | glycophorin A (MNS blood group)                                        | -2,89 | 0,00 |
| 235745_at                                                                                           | hs.133982 | ERN1              | endoplasmic reticulum to nucleus signalling 1                          | -2,94 | 0,00 |
| 219671_at                                                                                           | hs.524688 | HPCAL4            | hippocalcin like 4                                                     | -2,95 | 0,00 |
| 211176_s_at                                                                                         | hs.129706 | PAX4              | paired box gene 4                                                      | -2,98 | 0,00 |
| 242931_at                                                                                           | hs.175048 | ---               | Transcribed locus                                                      | -3,01 | 0,00 |
| 206172_at                                                                                           | hs.336046 | IL13RA2           | interleukin 13 receptor, alpha 2                                       | -3,10 | 0,00 |
| 244218_at                                                                                           | hs.122523 | SND1              | Staphylococcal nuclease and tudor domain containing 1                  | -3,15 | 0,00 |
| 241560_at                                                                                           | hs.164225 | Transcribed locus | Transcribed locus                                                      | -3,26 | 0,00 |
| 217685_at                                                                                           | hs.500761 | SLC16A3           | Solute carrier family 16, member 3 (monocarboxylic acid transporter 4) | -3,31 | 0,00 |
| 206226_at                                                                                           | hs.1498   | HRG               | histidine-rich glycoprotein                                            | -3,37 | 0,00 |
| 31835_at                                                                                            | hs.1498   | HRG               | histidine-rich glycoprotein                                            | -3,41 | 0,00 |
| 215005_at                                                                                           | hs.140950 | EFCBP2            | EF-hand calcium binding protein 2                                      | -3,58 | 0,00 |
| 204489_s_at                                                                                         | hs.502328 | CD44              | CD44 molecule (Indian blood group)                                     | -3,65 | 0,00 |
| 222903_s_at                                                                                         | hs.547988 | CPEB1             | cytoplasmic polyadenylation element binding protein 1                  | -3,71 | 0,00 |
| 1558579_at                                                                                          | hs.587089 | LOC642691         | hypothetical LOC642691                                                 | -3,74 | 0,00 |
| 1555997_s_at                                                                                        | hs.635441 | IGFBP5            | insulin-like growth factor binding protein 5                           | -3,99 | 0,00 |
| 224111_x_at                                                                                         | hs.136280 | KLF16             | Kruppel-like factor 16                                                 | -4,13 | 0,00 |
| 210472_at                                                                                           | hs.433391 | MT1G              | metallothionein 1G                                                     | -4,17 | 0,00 |
| 206074_s_at                                                                                         | hs.518805 | HMGA1             | high mobility group AT-hook 1                                          | -4,18 | 0,00 |

|             |           |                                                                                                                          |                                                                                              |       |      |
|-------------|-----------|--------------------------------------------------------------------------------------------------------------------------|----------------------------------------------------------------------------------------------|-------|------|
| 223800_s_at | hs.535619 | LIMS3                                                                                                                    | LIM and senescent cell antigen-like domains 3                                                | -4,43 | 0,00 |
| 205302_at   | hs.642938 | IGFBP1                                                                                                                   | insulin-like growth factor binding protein 1                                                 | -4,62 | 0,00 |
| 215059_at   | hs.90250  | MRNA; cDNA<br>DKFZp564G112<br>(from clone<br>DKFZp564G112)                                                               | Chromosome 4 open reading frame 31                                                           | -4,79 | 0,00 |
| 205939_at   | hs.111944 | CYP3A7                                                                                                                   | cytochrome P450, family 3, subfamily A, polypeptide 7                                        | -5,05 | 0,00 |
| 223582_at   | hs.591777 | GPR98                                                                                                                    | G protein-coupled receptor 98                                                                | -5,44 | 0,00 |
| 206325_at   | hs.532635 | SERPINA6                                                                                                                 | serpin peptidase inhibitor, clade A (alpha-1 antiproteinase, antitrypsin), member 6          | -5,81 | 0,00 |
| 240320_at   | hs.318431 | Transcribed locus, strongly similar to NP_065885.1 KIAA1443; homeodomain leucine zipper-containing factor [Homo sapiens] | Transcribed locus, strongly similar to XP_001150530.1 hypothetical protein [Pan troglodytes] | -6,17 | 0,00 |
| 218687_s_at | hs.5940   | MUC13                                                                                                                    | mucin 13, cell surface associated                                                            | -6,70 | 0,00 |
| 223869_at   | hs.349204 | SOST                                                                                                                     | sclerosteosis                                                                                | -8,35 | 0,00 |
| 220108_at   | hs.657795 | GNA14                                                                                                                    | guanine nucleotide binding protein (G protein), alpha 14                                     | -1,84 | 0,88 |
| 206447_at   | hs.631866 | ELA2A                                                                                                                    | elastase 2A                                                                                  | -2,05 | 0,88 |
| 204000_at   | hs.155090 | GNB5                                                                                                                     | guanine nucleotide binding protein (G protein), beta 5                                       | -2,15 | 0,88 |
| 216029_at   | hs.587111 | CDNA FLJ14348 fis, clone THYRO1001602                                                                                    | CDNA FLJ14348 fis, clone THYRO1001602                                                        | -2,17 | 0,88 |
| 206101_at   | hs.117060 | ECM2                                                                                                                     | extracellular matrix protein 2, female organ and adipocyte specific                          | -2,18 | 0,88 |
| 208594_x_at | ---       | LILRA6                                                                                                                   | leukocyte immunoglobulin-like receptor, subfamily A (with TM domain), member 6               | -2,39 | 0,88 |
| 205998_x_at | hs.654391 | CYP3A4                                                                                                                   | cytochrome P450, family 3, subfamily A, polypeptide 4                                        | -2,46 | 0,88 |

|              |           |                           |                                                                     |       |      |
|--------------|-----------|---------------------------|---------------------------------------------------------------------|-------|------|
| 208533_at    | hs.202526 | SOX1                      | SRY (sex determining region Y)-box 1                                | -2,51 | 0,88 |
| 215856_at    | hs.287692 | CD33L3                    | sialic acid binding Ig-like lectin 15                               | -2,51 | 0,88 |
| 1564021_at   | hs.683861 | MGC11257                  | CDNA FLJ37693 fis, clone BRHIP2014954                               | -2,51 | 0,88 |
| 240274_at    | hs.368642 | EPB42                     | Erythrocyte membrane protein band 4.2                               | -2,53 | 0,88 |
| 224291_at    | hs.631560 | CACNG6                    | calcium channel, voltage-dependent, gamma subunit 6                 | -2,56 | 0,88 |
| 205229_s_at  | hs.21016  | COCH                      | coagulation factor C homolog, cochlin (Limulus polyphemus)          | -2,56 | 0,88 |
| 1553660_at   | hs.669039 | HUS1B                     | HUS1 checkpoint homolog b (S. pombe)                                | -2,62 | 0,88 |
| 223623_at    | hs.43125  | C2orf40                   | chromosome 2 open reading frame 40                                  | -2,67 | 0,88 |
| 1556542_a_at | hs.659709 | ANKMY2                    | Full length insert cDNA clone YZ60H05                               | -2,77 | 0,88 |
| 228335_at    | hs.31595  | CLDN11                    | claudin 11 (oligodendrocyte transmembrane protein)                  | -2,78 | 0,88 |
| 208387_s_at  | hs.567417 | MMP24                     | matrix metalloproteinase 24 (membrane-inserted)                     | -2,79 | 0,88 |
| 208850_s_at  | hs.653181 | THY1                      | Thy-1 cell surface antigen                                          | -2,93 | 0,88 |
| 221234_s_at  | hs.269764 | BACH2                     | BTB and CNC homology 1, basic leucine zipper transcription factor 2 | -2,95 | 0,88 |
| 231358_at    | hs.30495  | Transcribed locus         | Transcribed locus                                                   | -3,02 | 0,88 |
| 227949_at    | hs.473218 | PHACTR3                   | phosphatase and actin regulator 3                                   | -3,16 | 0,88 |
| 211886_s_at  | hs.381715 | TBX5                      | T-box 5                                                             | -3,61 | 0,88 |
| 1558402_at   | hs.593732 | Homo sapiens, clone IMAGE | Homo sapiens, clone IMAGE:5209198, mRNA                             | -3,98 | 0,88 |
| 231587_at    | hs.73849  | APOC3                     | Apolipoprotein C-III                                                | -4,73 | 0,88 |
| 205820_s_at  | hs.73849  | APOC3                     | apolipoprotein C-III                                                | -5,14 | 0,88 |
| 230764_at    | hs.657173 | C9orf5                    | CDNA FLJ30669 fis, clone FCBBF1000684                               | -1,87 | 1,04 |
| 235429_at    | hs.646171 | EIF3S6                    | Transcribed locus                                                   | -2,13 | 1,04 |
| 206399_x_at  | hs.501632 | CACNA1A                   | calcium channel, voltage-dependent, P/Q type, alpha 1A subunit      | -2,15 | 1,04 |
| 210262_at    | hs.2042   | CRISP2                    | cysteine-rich secretory protein 2                                   | -2,17 | 1,04 |
| 229503_at    | hs.507260 | SLC15A4                   | Solute carrier family 15, member 4                                  | -2,19 | 1,04 |
| 219736_at    | hs.519514 | TRIM36                    | tripartite motif-containing 36                                      | -2,19 | 1,04 |
| 236040_at    | hs.43879  | XAGE3                     | X antigen family, member 3                                          | -2,19 | 1,04 |
| 218021_at    | hs.658162 | DHRS4                     | dehydrogenase/reductase (SDR family) member 4                       | -2,20 | 1,04 |
| 204991_s_at  | hs.187898 | NF2                       | neurofibromin 2 (bilateral acoustic neuroma)                        | -2,20 | 1,04 |
| 1569448_at   | hs.26612  | PGM2L1                    | Phosphoglucomutase 2-like 1                                         | -2,20 | 1,04 |

|              |           |                                             |                                                                        |       |      |
|--------------|-----------|---------------------------------------------|------------------------------------------------------------------------|-------|------|
| 208041_at    | hs.103501 | GRK1                                        | G protein-coupled receptor kinase 1                                    | -2,22 | 1,04 |
| 211124_s_at  | hs.1048   | KITLG                                       | KIT ligand                                                             | -2,24 | 1,04 |
| 221660_at    | hs.247831 | MYLC2PL                                     | myosin light chain 2, precursor lymphocyte-specific                    | -2,26 | 1,04 |
| 217165_x_at  | ---       | MT1F                                        | metallothionein 1F                                                     | -2,30 | 1,04 |
| 239964_at    | hs.510368 | TCL6                                        | T-cell leukemia/lymphoma 6                                             | -2,32 | 1,04 |
| 229553_at    | hs.26612  | PGM2L1                                      | phosphoglucomutase 2-like 1                                            | -2,34 | 1,04 |
| 1563283_at   | hs.638924 | CDNA clone<br>IMAGE                         | CDNA clone IMAGE:4828909                                               | -2,41 | 1,04 |
| 220393_at    | hs.149585 | GLULD1                                      | glutamate-ammonia ligase (glutamine synthetase)<br>domain containing 1 | -2,42 | 1,04 |
| 224300_x_at  | hs.415846 | FTCD                                        | formiminotransferase cyclodeaminase                                    | -2,48 | 1,04 |
| 227550_at    | hs.388347 | LOC143381                                   | hypothetical protein LOC143381                                         | -2,48 | 1,04 |
| 224299_x_at  | hs.415846 | FTCD                                        | formiminotransferase cyclodeaminase                                    | -2,53 | 1,04 |
| 240382_at    | hs.655976 | DSP                                         | Clone IMAGE:110436 mRNA sequence                                       | -2,61 | 1,04 |
| 1559255_a_at | hs.233343 | Full length insert<br>cDNA clone<br>YW26C09 | Full length insert cDNA clone YW26C09                                  | -2,64 | 1,04 |
| 206619_at    | hs.159311 | DKK4                                        | dickkopf homolog 4 ( <i>Xenopus laevis</i> )                           | -2,67 | 1,04 |
| 207667_s_at  | hs.514012 | MAP2K3                                      | mitogen-activated protein kinase kinase 3                              | -2,77 | 1,04 |
| 219465_at    | hs.237658 | APOA2                                       | apolipoprotein A-II                                                    | -2,80 | 1,04 |
| 222102_at    | hs.102484 | GSTA3                                       | glutathione S-transferase A3                                           | -2,84 | 1,04 |
| 243763_x_at  | hs.661570 | KIAA0226                                    | Transcribed locus                                                      | -2,88 | 1,04 |
| 219840_s_at  | hs.510368 | TCL6                                        | T-cell leukemia/lymphoma 6                                             | -2,93 | 1,04 |
| 243145_at    | ---       | ---                                         | ---                                                                    | -3,04 | 1,04 |
| 244424_at    | ---       | LOC439938                                   | hypothetical gene supported by NM_178534                               | -3,47 | 1,04 |
| 230499_at    | hs.664299 | BIRC3                                       | Transcribed locus                                                      | -3,58 | 1,04 |
| 235617_x_at  | hs.518341 | Homo sapiens,<br>clone IMAGE                | Homo sapiens, clone IMAGE:4293240, mRNA                                | -4,00 | 1,04 |
| 205216_s_at  | hs.445358 | APOH                                        | apolipoprotein H (beta-2-glycoprotein I)                               | -4,56 | 1,04 |
| 220076_at    | hs.156727 | ANKH                                        | ankylosis, progressive homolog (mouse)                                 | -1,87 | 1,14 |
| 216479_at    | hs.648228 | RPL21                                       | ribosomal protein L21                                                  | -1,92 | 1,14 |
| 216497_at    | hs.647283 | HNRPA1                                      | heterogeneous nuclear ribonucleoprotein A1                             | -1,94 | 1,14 |
| 201810_s_at  | hs.257761 | SH3BP5                                      | SH3-domain binding protein 5 (BTK-associated)                          | -1,94 | 1,14 |
| 202849_x_at  | hs.235116 | GRK6                                        | G protein-coupled receptor kinase 6                                    | -2,04 | 1,14 |

|              |           |                                       |                                                                           |       |      |
|--------------|-----------|---------------------------------------|---------------------------------------------------------------------------|-------|------|
| 238559_at    | hs.187018 | CDNA clone IMAGE                      | CDNA clone IMAGE:5266242                                                  | -2,05 | 1,14 |
| 217313_at    | ---       | ---                                   | ---                                                                       | -2,15 | 1,14 |
| 229690_at    | hs.173088 | FAM109A                               | family with sequence similarity 109, member A                             | -2,18 | 1,14 |
| 244299_at    | ---       | ---                                   | ---                                                                       | -2,20 | 1,14 |
| 220989_s_at  | hs.534494 | AMN                                   | amnionless homolog (mouse)                                                | -2,22 | 1,14 |
| 1562368_at   | hs.665701 | CARD11                                | MRNA; cDNA DKFZp667P018 (from clone DKFZp667P018)                         | -2,22 | 1,14 |
| 1566501_at   | hs.675427 | TBXAS1                                | CDNA FLJ20787 fis, clone COL02178                                         | -2,28 | 1,14 |
| 1559645_at   | hs.209162 | Non-coding RNA HANC                   | Non-coding RNA HANC                                                       | -2,34 | 1,14 |
| 223979_x_at  | hs.415846 | FTCD                                  | formiminotransferase cyclodeaminase                                       | -2,42 | 1,14 |
| 1559205_s_at | hs.322462 | Homo sapiens, clone IMAGE             | Homo sapiens, clone IMAGE:5745627, mRNA                                   | -2,50 | 1,14 |
| 1562288_at   | hs.535143 | CDNA clone IMAGE                      | CDNA clone IMAGE:5262193                                                  | -2,55 | 1,14 |
| 230319_at    | hs.90250  | CDNA FLJ36413 fis, clone THYMU2010816 | Chromosome 4 open reading frame 31                                        | -2,63 | 1,14 |
| 219700_at    | hs.125036 | PLXDC1                                | plexin domain containing 1                                                | -2,65 | 1,14 |
| 205838_at    | hs.434973 | GYPA                                  | glycophorin A (MNS blood group)                                           | -2,89 | 1,14 |
| 205844_at    | hs.12114  | VNN1                                  | vanin 1                                                                   | -2,89 | 1,14 |
| 219466_s_at  | hs.237658 | APOA2                                 | apolipoprotein A-II                                                       | -3,39 | 1,14 |
| 228010_at    | hs.479069 | PPP2R2C                               | protein phosphatase 2 (formerly 2A), regulatory subunit B, gamma isoform  | -3,40 | 1,14 |
| 226991_at    | hs.652283 | CDNA                                  | Nuclear factor of activated T-cells, cytoplasmic, calcineurin-dependent 2 | -6,49 | 1,14 |
| 217019_at    | ---       | ---                                   | ---                                                                       | -1,89 | 1,43 |
| 216395_at    | hs.658767 | FBXL18                                | F-box and leucine-rich repeat protein 18                                  | -2,01 | 1,43 |
| 203657_s_at  | hs.11590  | CTSF                                  | cathepsin F                                                               | -2,23 | 1,43 |
| 232269_x_at  | hs.533772 | METRNL                                | meteorin, glial cell differentiation regulator                            | -2,24 | 1,43 |
| 229686_at    | hs.111377 | P2RY8                                 | purinergic receptor P2Y, G-protein coupled, 8                             | -2,26 | 1,43 |
| 223702_x_at  | hs.415846 | FTCD                                  | formiminotransferase cyclodeaminase                                       | -2,36 | 1,43 |

|              |           |                                                                                             |                                                                                |       |      |
|--------------|-----------|---------------------------------------------------------------------------------------------|--------------------------------------------------------------------------------|-------|------|
| 1557744_at   | hs.636574 | CDNA FLJ25841<br>fis, clone<br>TST08665                                                     | CDNA FLJ25841 fis, clone TST08665                                              | -2,37 | 1,43 |
| 1558549_s_at | hs.12114  | VNN1                                                                                        | vanin 1                                                                        | -2,94 | 1,43 |
| 226911_at    | hs.20103  | EGFLAM                                                                                      | EGF-like, fibronectin type III and laminin G domains                           | -3,04 | 1,43 |
| 230251_at    | hs.31917  | Full-length cDNA<br>clone<br>CLOBB018ZH05 of<br>Neuroblastoma<br>of Homo sapiens<br>(human) | Chromosome 6 open reading frame 176                                            | -3,63 | 1,43 |
| 225446_at    | hs.654740 | BRWD1                                                                                       | bromodomain and WD repeat domain containing 1                                  | -1,81 | 1,51 |
| 203228_at    | hs.466831 | PAFAH1B3                                                                                    | platelet-activating factor acetylhydrolase, isoform Ib,<br>gamma subunit 29kDa | -1,82 | 1,51 |
| 217346_at    | hs.647216 | PPIA                                                                                        | peptidylprolyl isomerase A (cyclophilin A)                                     | -1,86 | 1,51 |
| 1556803_at   | hs.610795 | POLR3B                                                                                      | polymerase (RNA) III (DNA directed) polypeptide B                              | -1,88 | 1,51 |
| 224924_at    | hs.370603 | TTC7A                                                                                       | tetratricopeptide repeat domain 7A                                             | -1,91 | 1,51 |
| 235074_at    | hs.525781 | SPRED1                                                                                      | Sprouty-related, EVH1 domain containing 1                                      | -1,93 | 1,51 |
| 235289_at    | hs.164144 | EIF5A2                                                                                      | eukaryotic translation initiation factor 5A2                                   | -1,95 | 1,51 |
| 232113_at    | hs.411391 | LOC399959                                                                                   | CDNA FLJ38472 fis, clone FEBRA2022148                                          | -1,97 | 1,51 |
| 230889_at    | hs.163898 | LOC645321                                                                                   | hypothetical LOC645321                                                         | -1,98 | 1,51 |
| 219155_at    | hs.591185 | PITPNC1                                                                                     | phosphatidylinositol transfer protein, cytoplasmic 1                           | -1,98 | 1,51 |
| 233194_at    | hs.662433 | STARD13                                                                                     | MRNA; cDNA DKFZp434B1023 (from clone<br>DKFZp434B1023)                         | -2,00 | 1,51 |
| 216584_at    | ---       | ---                                                                                         | ---                                                                            | -2,02 | 1,51 |
| 205599_at    | hs.531251 | TRAF1                                                                                       | TNF receptor-associated factor 1                                               | -2,03 | 1,51 |
| 242192_at    | ---       | ---                                                                                         | ---                                                                            | -2,06 | 1,51 |
| 213629_x_at  | ---       | MT1F                                                                                        | metallothionein 1F                                                             | -2,09 | 1,51 |
| 234963_s_at  | hs.461329 | FA2H                                                                                        | fatty acid 2-hydroxylase                                                       | -2,10 | 1,51 |
| 214556_at    | hs.673846 | SSTR4                                                                                       | somatostatin receptor 4                                                        | -2,16 | 1,51 |
| 210916_s_at  | hs.502328 | CD44                                                                                        | CD44 molecule (Indian blood group)                                             | -2,18 | 1,51 |
| 225520_at    | hs.591343 | MTHFD1L                                                                                     | methylenetetrahydrofolate dehydrogenase (NADP+<br>dependent) 1-like            | -2,20 | 1,51 |
| 1552398_a_at | hs.190519 | CLEC12A                                                                                     | C-type lectin domain family 12, member A                                       | -2,24 | 1,51 |



|              |           |                           |                                                                                                                                                          |       |      |
|--------------|-----------|---------------------------|----------------------------------------------------------------------------------------------------------------------------------------------------------|-------|------|
| 203348_s_at  | hs.43697  | ETV5                      | ets variant gene 5 (ets-related molecule)                                                                                                                | -2,24 | 1,51 |
| 210141_s_at  | hs.407506 | INHHA                     | inhibin, alpha                                                                                                                                           | -2,28 | 1,51 |
| 205800_at    | hs.112916 | SLC3A1                    | solute carrier family 3 (cystine, dibasic and neutral amino acid transporters, activator of cystine, dibasic and neutral amino acid transport), member 1 | -2,28 | 1,51 |
| 212803_at    | hs.159223 | NAB2                      | NGFI-A binding protein 2 (EGR1 binding protein 2)                                                                                                        | -2,30 | 1,51 |
| 234807_x_at  | ---       | ---                       | ---                                                                                                                                                      | -2,37 | 1,51 |
| 1554524_a_at | hs.484475 | OLFM3                     | olfactomedin 3                                                                                                                                           | -2,39 | 1,51 |
| 210095_s_at  | hs.450230 | IGFBP3                    | insulin-like growth factor binding protein 3                                                                                                             | -2,43 | 1,51 |
| 236088_at    | hs.657434 | NTNG1                     | netrin G1                                                                                                                                                | -2,58 | 1,51 |
| 237969_at    | hs.25377  | ABCA10                    | ATP-binding cassette, sub-family A (ABC1), member 10                                                                                                     | -2,60 | 1,51 |
| 209360_s_at  | hs.149261 | RUNX1                     | runt-related transcription factor 1 (acute myeloid leukemia 1; aml1 oncogene)                                                                            | -2,61 | 1,51 |
| 1562295_at   | hs.660881 | Homo sapiens, clone IMAGE | Hypothetical protein LOC730057                                                                                                                           | -2,62 | 1,51 |
| 207249_s_at  | hs.367833 | SLC28A2                   | solute carrier family 28 (sodium-coupled nucleoside transporter), member 2                                                                               | -2,76 | 1,51 |
| 204337_at    | hs.386726 | RGS4                      | regulator of G-protein signalling 4                                                                                                                      | -2,92 | 1,51 |
| 209768_s_at  | hs.283743 | GP1BB                     | glycoprotein Ib (platelet), beta polypeptide                                                                                                             | -2,92 | 1,51 |
| 224323_s_at  | hs.131072 | MRO                       | maestro                                                                                                                                                  | -3,40 | 1,51 |
| 205081_at    | hs.70327  | CRIP1                     | cysteine-rich protein 1 (intestinal)                                                                                                                     | -3,41 | 1,51 |
| 214613_at    | hs.66542  | GPR3                      | G protein-coupled receptor 3                                                                                                                             | -3,59 | 1,51 |
| 231462_at    | hs.150849 | LOC283953                 | Hypothetical LOC283953                                                                                                                                   | -3,62 | 1,51 |
| 225698_at    | hs.12082  | C5orf26                   | chromosome 5 open reading frame 26                                                                                                                       | -1,82 | 1,96 |
| 241646_s_at  | ---       | LOC641748                 | hypothetical protein LOC641748                                                                                                                           | -1,86 | 1,96 |
| 206089_at    | hs.657172 | NELL1                     | NEL-like 1 (chicken)                                                                                                                                     | -1,88 | 1,96 |
| 244156_at    | hs.669511 | Transcribed locus         | Transcribed locus                                                                                                                                        | -1,94 | 1,96 |
| 208275_x_at  | hs.458406 | UTF1                      | undifferentiated embryonic cell transcription factor 1                                                                                                   | -1,96 | 1,96 |
| 234737_at    | hs.48428  | NT5DC3                    | 5'-nucleotidase domain containing 3                                                                                                                      | -1,97 | 1,96 |
| 1570106_at   | hs.685324 | C1orf71                   | CDNA clone IMAGE:5266681                                                                                                                                 | -1,97 | 1,96 |
| 241017_at    | hs.442657 | TBC1D8                    | TBC1 domain family, member 8 (with GRAM domain)                                                                                                          | -2,01 | 1,96 |
| 223824_at    | hs.149849 | C10orf59                  | chromosome 10 open reading frame 59                                                                                                                      | -2,04 | 1,96 |
| 1562892_at   | hs.375707 | CHCHD5                    | Coiled-coil-helix-coiled-coil-helix domain containing 5                                                                                                  | -2,05 | 1,96 |

|                             |           |                   |                                                                         |       |      |
|-----------------------------|-----------|-------------------|-------------------------------------------------------------------------|-------|------|
| 234129_at                   | hs.24598  | ARHGEF12          | Rho guanine nucleotide exchange factor (GEF) 12                         | -2,06 | 1,96 |
| 213692_s_at                 | ---       | ---               | ---                                                                     | -2,15 | 1,96 |
| 234380_x_at                 | ---       | ---               | ---                                                                     | -2,15 | 1,96 |
| 244676_s_at                 | ---       | ---               | ---                                                                     | -2,24 | 1,96 |
| 208394_x_at                 | hs.129944 | ESM1              | endothelial cell-specific molecule 1                                    | -2,28 | 1,96 |
| 205696_s_at                 | hs.591913 | GFRA1             | GDNF family receptor alpha 1                                            | -2,34 | 1,96 |
| 232422_at                   | hs.350868 | RP11-151A6.2      | hypothetical protein BC004360                                           | -2,38 | 1,96 |
| 220604_x_at                 | hs.415846 | FTCD              | formiminotransferase cyclodeaminase                                     | -2,42 | 1,96 |
| 237350_at                   | hs.653449 | LOC143941         | similar to CDNA sequence BC021608                                       | -2,43 | 1,96 |
| 212575_at                   | hs.515003 | C19orf6           | chromosome 19 open reading frame 6                                      | -2,50 | 1,96 |
| AFFX-<br>HUMRGE/M10098_3_at | ---       | ---               | ---                                                                     | -2,65 | 1,96 |
| 224324_at                   | hs.131072 | MRO               | maestro                                                                 | -2,67 | 1,96 |
| 223734_at                   | ---       | OSAP              | ovary-specific acidic protein                                           | -2,92 | 1,96 |
| 202883_s_at                 | hs.584790 | PPP2R1B           | protein phosphatase 2 (formerly 2A), regulatory subunit A, beta isoform | -1,77 | 2,37 |
| 242404_at                   | hs.562598 | Transcribed locus | Transcribed locus                                                       | -1,79 | 2,37 |
| 219379_x_at                 | hs.133475 | ZNF358            | zinc finger protein 358                                                 | -1,79 | 2,37 |
| 216823_at                   | hs.584939 | LOC439992         | ribosomal protein S3A                                                   | -1,80 | 2,37 |
| 216348_at                   | hs.433427 | RPS17             | ribosomal protein S17                                                   | -1,83 | 2,37 |
| 1552690_a_at                | hs.13768  | CACNA2D4          | calcium channel, voltage-dependent, alpha 2/delta subunit 4             | -1,83 | 2,37 |
| 217379_at                   | hs.646988 | ---               | similar to ribosomal protein L10                                        | -1,87 | 2,37 |
| 206827_s_at                 | hs.302740 | TRPV6             | transient receptor potential cation channel, subfamily V, member 6      | -1,89 | 2,37 |
| AFFX-TrpnX-M_at             | ---       | ---               | ---                                                                     | -1,92 | 2,37 |
| 1563085_at                  | hs.282376 | RPS4Y1            | Ribosomal protein S4, Y-linked 1                                        | -1,92 | 2,37 |
| 243582_at                   | hs.443728 | SH3RF2            | SH3 domain containing ring finger 2                                     | -1,92 | 2,37 |
| 206047_at                   | hs.631657 | GNB3              | guanine nucleotide binding protein (G protein), beta polypeptide 3      | -1,93 | 2,37 |
| 217266_at                   | hs.612317 | RPL15             | ribosomal protein L15                                                   | -1,93 | 2,37 |
| 216383_at                   | hs.647617 | LOC347544         | ribosomal protein L18a                                                  | -1,95 | 2,37 |
| 240278_at                   | hs.476270 | RASSF1            | Ras association (RalGDS/AF-6) domain family 1                           | -1,98 | 2,37 |

|             |           |                                       |                                                                                           |       |      |
|-------------|-----------|---------------------------------------|-------------------------------------------------------------------------------------------|-------|------|
| 1553945_at  | hs.375028 | GPHB5                                 | glycoprotein hormone beta 5                                                               | -2,03 | 2,37 |
| 205332_at   | hs.654972 | RCE1                                  | RCE1 homolog, prenyl protein peptidase ( <i>S. cerevisiae</i> )                           | -2,06 | 2,37 |
| 242431_at   | hs.268787 | ARIH1                                 | Ariadne homolog, ubiquitin-conjugating enzyme E2 binding protein, 1 ( <i>Drosophila</i> ) | -2,11 | 2,37 |
| 221441_at   | hs.534318 | GSCL                                  | goosecoid-like                                                                            | -2,12 | 2,37 |
| 219523_s_at | hs.130438 | ODZ3                                  | odz, odd Oz/ten-m homolog 3 ( <i>Drosophila</i> )                                         | -2,12 | 2,37 |
| 217363_x_at | ---       | ---                                   | ---                                                                                       | -2,16 | 2,37 |
| 228248_at   | hs.407926 | RICTOR                                | rapamycin-insensitive companion of mTOR                                                   | -2,17 | 2,37 |
| 203928_x_at | hs.101174 | MAPT                                  | microtubule-associated protein tau                                                        | -2,18 | 2,37 |
| 1556794_at  | ---       | ---                                   | ---                                                                                       | -2,22 | 2,37 |
| 1569387_at  | hs.675369 | ChGn                                  | CDNA clone IMAGE:4818243                                                                  | -2,38 | 2,37 |
| 207773_x_at | hs.306220 | CYP3A43                               | cytochrome P450, family 3, subfamily A, polypeptide 43                                    | -2,43 | 2,37 |
| 222782_s_at | hs.49427  | GMIP                                  | GEM interacting protein                                                                   | -2,50 | 2,37 |
| 243965_at   | hs.620804 | CDNA clone IMAGE                      | CDNA clone IMAGE:5265532                                                                  | -2,54 | 2,37 |
| 211843_x_at | hs.111944 | CYP3A7                                | cytochrome P450, family 3, subfamily A, polypeptide 7                                     | -2,57 | 2,37 |
| 242340_at   | hs.603121 | Transcribed locus                     | Transcribed locus                                                                         | -2,63 | 2,37 |
| 1559520_at  | hs.434973 | GYPA                                  | Glycophorin A (MNS blood group)                                                           | -2,65 | 2,37 |
| 216732_at   | hs.677240 | CDNA FLJ13628 fis, clone PLACE1011054 | CDNA FLJ13628 fis, clone PLACE1011054                                                     | -2,71 | 2,37 |
| 230147_at   | hs.42502  | F2RL2                                 | coagulation factor II (thrombin) receptor-like 2                                          | -3,01 | 2,37 |
| 212921_at   | hs.66170  | SMYD2                                 | SET and MYND domain containing 2                                                          | -3,19 | 2,37 |
| 222712_s_at | hs.5940   | MUC13                                 | mucin 13, cell surface associated                                                         | -4,72 | 2,37 |
| 239670_at   | ---       | ---                                   | ---                                                                                       | -1,71 | 2,66 |
| 203373_at   | hs.485572 | SOCS2                                 | suppressor of cytokine signaling 2                                                        | -1,77 | 2,66 |
| 203994_s_at | hs.517331 | C21orf2                               | chromosome 21 open reading frame 2                                                        | -1,79 | 2,66 |
| 237343_at   | hs.190267 | CDNA clone IMAGE                      | CDNA clone IMAGE:30378154                                                                 | -1,81 | 2,66 |
| 221904_at   | hs.591307 | C3orf40                               | family with sequence similarity 131, member A                                             | -1,82 | 2,66 |
| 201677_at   | hs.458320 | C3orf37                               | Chromosome 3 open reading frame 37                                                        | -1,82 | 2,66 |
| 225632_s_at | hs.546542 | RAB43                                 | RAB43, member RAS oncogene family                                                         | -1,83 | 2,66 |

|              |           |                   |                                                            |       |      |
|--------------|-----------|-------------------|------------------------------------------------------------|-------|------|
| 226038_at    | hs.180178 | LONRF1            | LON peptidase N-terminal domain and ring finger 1          | -1,84 | 2,66 |
| 220733_at    | hs.658244 | SLC26A1           | solute carrier family 26 (sulfate transporter), member 1   | -1,85 | 2,66 |
| 239303_at    | hs.274150 | ---               | Transcribed locus                                          | -1,86 | 2,66 |
| 208891_at    | hs.298654 | DUSP6             | dual specificity phosphatase 6                             | -1,86 | 2,66 |
| 227708_at    | hs.586423 | EEF1A1            | eukaryotic translation elongation factor 1 alpha 1         | -1,91 | 2,66 |
| 220698_at    | hs.649915 | MGC4294           | hypothetical protein MGC4294                               | -1,92 | 2,66 |
| 224798_s_at  | hs.367690 | C15orf17          | chromosome 15 open reading frame 17                        | -1,92 | 2,66 |
| 241240_at    | hs.663951 | ATF6              | Transcribed locus                                          | -1,93 | 2,66 |
| 207510_at    | hs.525572 | BDKRB1            | bradykinin receptor B1                                     | -1,94 | 2,66 |
| 210524_x_at  | ---       | ---               | ---                                                        | -1,97 | 2,66 |
| 216601_at    | hs.367781 | LOC90586          | AOC3 pseudogene                                            | -1,97 | 2,66 |
| 206263_at    | hs.386502 | FMO4              | flavin containing monooxygenase 4                          | -1,99 | 2,66 |
| 226766_at    | hs.13305  | ROBO2             | roundabout, axon guidance receptor, homolog 2 (Drosophila) | -2,00 | 2,66 |
| 1556540_a_at | hs.684669 | RAI1              | Full length insert cDNA clone ZD74A12                      | -2,00 | 2,66 |
| 1560212_a_at | hs.181500 | Transcribed locus | Transcribed locus                                          | -2,01 | 2,66 |
| 211910_at    | ---       | ---               | ---                                                        | -2,07 | 2,66 |
| 209263_x_at  | hs.654836 | TSPAN4            | tetraspanin 4                                              | -2,10 | 2,66 |
| 242132_x_at  | ---       | ---               | ---                                                        | -2,10 | 2,66 |
| 204712_at    | hs.284122 | WIF1              | WNT inhibitory factor 1                                    | -2,15 | 2,66 |
| 216129_at    | hs.592144 | ATP9A             | ATPase, Class II, type 9A                                  | -2,16 | 2,66 |
| 232516_x_at  | hs.584927 | YY1AP1            | YY1 associated protein 1                                   | -2,18 | 2,66 |
| 213172_at    | hs.79170  | TTC9              | tetratricopeptide repeat domain 9                          | -2,18 | 2,66 |
| 208851_s_at  | hs.653181 | THY1              | Thy-1 cell surface antigen                                 | -2,20 | 2,66 |
| 232363_at    | hs.657178 | PSIP1             | CDNA: FLJ20863 fis, clone ADKA01804                        | -2,25 | 2,66 |
| 223216_x_at  | hs.435535 | ZNF395            | zinc finger protein 395                                    | -2,29 | 2,66 |
| 225966_at    | hs.356545 | LOC284184         | hypothetical LOC284184                                     | -2,32 | 2,66 |
| 236790_s_at  | ---       | ---               | ---                                                        | -2,32 | 2,66 |
| 203426_s_at  | hs.635441 | IGFBP5            | insulin-like growth factor binding protein 5               | -2,34 | 2,66 |
| 227212_s_at  | hs.460124 | PHF19             | PHD finger protein 19                                      | -2,39 | 2,66 |
| 36742_at     | hs.591789 | TRIM15            | tripartite motif-containing 15                             | -2,41 | 2,66 |

|              |           |                                                                                    |                                                                                              |       |      |
|--------------|-----------|------------------------------------------------------------------------------------|----------------------------------------------------------------------------------------------|-------|------|
|              |           | Transcribed locus, moderately similar to NP_775735.1 I(3)mbt-like 4 [Homo sapiens] |                                                                                              |       |      |
| 240899_at    | hs.202201 |                                                                                    | Transcribed locus                                                                            | -2,43 | 2,66 |
| 222856_at    | hs.303084 | APLN                                                                               | apelin, AGTRL1 ligand                                                                        | -2,44 | 2,66 |
| 219064_at    | hs.498586 | ITIH5                                                                              | inter-alpha (globulin) inhibitor H5                                                          | -2,44 | 2,66 |
| 210064_s_at  | hs.271580 | UPK1B                                                                              | uroplakin 1B                                                                                 | -2,44 | 2,66 |
| 1563868_a_at | hs.130672 | C9orf79                                                                            | chromosome 9 open reading frame 79                                                           | -2,56 | 2,66 |
| 210885_s_at  | hs.591789 | TRIM15                                                                             | tripartite motif-containing 15                                                               | -2,70 | 2,66 |
| 213668_s_at  | hs.643910 | SOX4                                                                               | SRY (sex determining region Y)-box 4                                                         | -2,71 | 2,66 |
| 1569886_a_at | ---       | FLJ90231                                                                           | galactosidase, beta 1 like 3                                                                 | -2,73 | 2,66 |
| 216122_at    | hs.677271 | NAV1                                                                               | CDNA: FLJ20890 fis, clone ADKA03323                                                          | -2,90 | 2,66 |
| 1559433_at   | hs.473192 | LOC149773                                                                          | Hypothetical protein LOC149773                                                               | -3,82 | 2,66 |
| 228399_at    | hs.123933 | OSR1                                                                               | odd-skipped related 1 (Drosophila)                                                           | -3,97 | 2,66 |
| 228442_at    | hs.599855 | Transcribed locus                                                                  | Transcribed locus                                                                            | -5,10 | 2,66 |
| 211210_x_at  | hs.349094 | SH2D1A                                                                             | SH2 domain protein 1A, Duncan's disease (lymphoproliferative syndrome)                       | -1,78 | 3,22 |
| 224347_x_at  | hs.191987 | UBE2J2                                                                             | ubiquitin-conjugating enzyme E2, J2 (UBC6 homolog, yeast)                                    | -1,79 | 3,22 |
| 1556464_a_at | hs.551993 | LOC257407                                                                          | hypothetical protein LOC257407                                                               | -1,81 | 3,22 |
| 1555659_a_at | hs.117331 | TREML1                                                                             | triggering receptor expressed on myeloid cells-like 1                                        | -1,84 | 3,22 |
| 208892_s_at  | hs.298654 | DUSP6                                                                              | dual specificity phosphatase 6                                                               | -1,87 | 3,22 |
| 236183_at    | ---       | ---                                                                                | ---                                                                                          | -1,90 | 3,22 |
| 217714_x_at  | hs.209983 | STMN1                                                                              | stathmin 1/oncoprotein 18                                                                    | -1,91 | 3,22 |
| 228049_x_at  | hs.369728 | Transcribed locus                                                                  | Transcribed locus, strongly similar to XP_001172939.1 hypothetical protein [Pan troglodytes] | -1,91 | 3,22 |
| 214891_at    | hs.159699 | FBXO21                                                                             | F-box protein 21                                                                             | -1,91 | 3,22 |
| 236673_at    | ---       | ---                                                                                | ---                                                                                          | -1,93 | 3,22 |
| 205350_at    | hs.346950 | CRABP1                                                                             | cellular retinoic acid binding protein 1                                                     | -1,94 | 3,22 |
| 231179_at    | hs.17253  | IHPK3                                                                              | inositol hexaphosphate kinase 3                                                              | -1,96 | 3,22 |
| 231359_at    | hs.445358 | APOH                                                                               | Apolipoprotein H (beta-2-glycoprotein I)                                                     | -1,99 | 3,22 |
| 227450_at    | hs.162143 | C12orf46                                                                           | endoplasmic reticulum protein 27 kDa                                                         | -2,01 | 3,22 |

|              |           |                                             |                                                                            |       |      |
|--------------|-----------|---------------------------------------------|----------------------------------------------------------------------------|-------|------|
| 216016_at    | hs.159483 | CIAS1                                       | NLR family, pyrin domain containing 3                                      | -2,01 | 3,22 |
| 236639_at    | ---       | ---                                         | ---                                                                        | -2,03 | 3,22 |
| 232687_at    | hs.100912 | CDNA FLJ33091<br>fis, clone<br>TRACH2000660 | CDNA FLJ33091 fis, clone TRACH2000660                                      | -2,06 | 3,22 |
| 237387_at    | hs.673912 | ARPC5                                       | Transcribed locus                                                          | -2,07 | 3,22 |
| 244051_at    | hs.610157 | KATNAL1                                     | Transcribed locus                                                          | -2,09 | 3,22 |
| 223694_at    | hs.487412 | TRIM7                                       | tripartite motif-containing 7                                              | -2,10 | 3,22 |
| 239087_at    | hs.115959 | ANKS4B                                      | ankyrin repeat and sterile alpha motif domain<br>containing 4B             | -2,10 | 3,22 |
| 205289_at    | hs.73853  | BMP2                                        | bone morphogenetic protein 2                                               | -2,14 | 3,22 |
| 240628_at    | ---       | ---                                         | ---                                                                        | -2,14 | 3,22 |
| 238332_at    | hs.374774 | ANKRD29                                     | ankyrin repeat domain 29                                                   | -2,15 | 3,22 |
| 202886_s_at  | hs.584790 | PPP2R1B                                     | protein phosphatase 2 (formerly 2A), regulatory<br>subunit A, beta isoform | -2,16 | 3,22 |
| 209967_s_at  | hs.200250 | CREM                                        | cAMP responsive element modulator                                          | -2,19 | 3,22 |
| 210074_at    | hs.660866 | CTSL2                                       | cathepsin L2                                                               | -2,23 | 3,22 |
| 205455_at    | hs.517973 | MST1R                                       | macrophage stimulating 1 receptor (c-met-related<br>tyrosine kinase)       | -2,25 | 3,22 |
| 208367_x_at  | hs.654391 | CYP3A4                                      | cytochrome P450, family 3, subfamily A, polypeptide<br>4                   | -2,29 | 3,22 |
| 238568_s_at  | hs.662710 | C18orf8                                     | Transcribed locus                                                          | -2,38 | 3,22 |
| 210126_at    | hs.502092 | PSG9                                        | pregnancy specific beta-1-glycoprotein 9                                   | -2,46 | 3,22 |
| 244313_at    | hs.334019 | CR1                                         | complement component (3b/4b) receptor 1 (Knops<br>blood group)             | -2,48 | 3,22 |
| 224555_x_at  | hs.166371 | IL1F7                                       | interleukin 1 family, member 7 (zeta)                                      | -2,54 | 3,22 |
| 201418_s_at  | hs.643910 | SOX4                                        | SRY (sex determining region Y)-box 4                                       | -2,81 | 3,22 |
| 237053_at    | hs.12400  | CDNA clone<br>IMAGE                         | hypothetical LOC646658                                                     | -2,87 | 3,22 |
| 1553746_a_at | hs.355145 | FLJ90579                                    | chromosome 12 open reading frame 64                                        | -3,05 | 3,22 |
| 1554977_at   | hs.570316 | LOC198437                                   | bA299N6.3                                                                  | -3,20 | 3,22 |
| 217523_at    | hs.502328 | CD44                                        | CD44 molecule (Indian blood group)                                         | -3,53 | 3,22 |
| 211441_x_at  | hs.306220 | CYP3A43                                     | cytochrome P450, family 3, subfamily A, polypeptide<br>43                  | -3,72 | 3,22 |
| 205266_at    | hs.2250   | LIF                                         | leukemia inhibitory factor (cholinergic differentiation)                   | -4,48 | 3,22 |

|              |           |                                                            |                                                                                       |       |      |
|--------------|-----------|------------------------------------------------------------|---------------------------------------------------------------------------------------|-------|------|
|              |           |                                                            | factor)                                                                               |       |      |
| 222861_x_at  | hs.556006 | FBXO44                                                     | F-box protein 44                                                                      | -1,69 | 3,57 |
| 236940_at    | hs.648533 | Transcribed locus, weakly similar to XP_497870.1 PREDICTED | Transcribed locus, weakly similar to NP_066953.1 isomerase A isoform 1 [Homo sapiens] | -1,70 | 3,57 |
| 241632_x_at  | hs.666891 | STAU2                                                      | Transcribed locus                                                                     | -1,71 | 3,57 |
| 219225_at    | hs.520463 | PGBD5                                                      | piggyBac transposable element derived 5                                               | -1,76 | 3,57 |
| 241398_at    | hs.592198 | MPPED1                                                     | Metallophosphoesterase domain containing 1                                            | -1,78 | 3,57 |
| 219051_x_at  | hs.533772 | METRNL                                                     | meteorin, glial cell differentiation regulator                                        | -1,81 | 3,57 |
| 236745_at    | hs.381943 | CCDC78                                                     | coiled-coil domain containing 78                                                      | -1,82 | 3,57 |
| 237144_at    | hs.289019 | LTBP3                                                      | Latent transforming growth factor beta binding protein 3                              | -1,84 | 3,57 |
| 216336_x_at  | hs.656629 | MT1M                                                       | metallothionein 1M                                                                    | -1,84 | 3,57 |
| 211456_x_at  | hs.632513 | LOC645745                                                  | metallothionein 1 pseudogene 2                                                        | -1,86 | 3,57 |
| 232020_at    | hs.515011 | SMURF2                                                     | SMAD specific E3 ubiquitin protein ligase 2                                           | -1,86 | 3,57 |
| 204490_s_at  | hs.502328 | CD44                                                       | CD44 molecule (Indian blood group)                                                    | -1,87 | 3,57 |
| 1552311_a_at | hs.532691 | RAXL1                                                      | retina and anterior neural fold homeobox like 1                                       | -1,87 | 3,57 |
| 222107_x_at  | hs.521432 | LZTS1                                                      | leucine zipper, putative tumor suppressor 1                                           | -1,88 | 3,57 |
| 241333_x_at  | ---       | ---                                                        | ---                                                                                   | -1,89 | 3,57 |
| 1569926_s_at | hs.432442 | SLC34A3                                                    | solute carrier family 34 (sodium phosphate), member 3                                 | -1,90 | 3,57 |
| 223698_at    | hs.144130 | SLC25A36                                                   | solute carrier family 25, member 36                                                   | -1,90 | 3,57 |
| 236796_at    | hs.269764 | BACH2                                                      | BTB and CNC homology 1, basic leucine zipper transcription factor 2                   | -1,90 | 3,57 |
| 203750_s_at  | hs.654583 | RARA                                                       | retinoic acid receptor, alpha                                                         | -1,91 | 3,57 |
| 1563170_at   | hs.385789 | Homo sapiens, clone IMAGE                                  | Homo sapiens, clone IMAGE:4341708, mRNA                                               | -1,91 | 3,57 |
| 234880_x_at  | hs.534495 | KRTAP1-3                                                   | keratin associated protein 1-3                                                        | -1,91 | 3,57 |
| 207017_at    | hs.25318  | RAB27B                                                     | RAB27B, member RAS oncogene family                                                    | -1,92 | 3,57 |
| 217943_s_at  | hs.356096 | RPRC1                                                      | MAP7 domain containing 1                                                              | -1,95 | 3,57 |
| 208291_s_at  | hs.435609 | TH                                                         | tyrosine hydroxylase                                                                  | -1,95 | 3,57 |
| 208893_s_at  | hs.298654 | DUSP6                                                      | dual specificity phosphatase 6                                                        | -2,02 | 3,57 |
| 231387_at    | hs.484500 | C6orf145                                                   | Chromosome 6 open reading frame 145                                                   | -2,04 | 3,57 |

|              |           |           |                                                                                                |       |      |
|--------------|-----------|-----------|------------------------------------------------------------------------------------------------|-------|------|
| 228609_at    | hs.646751 | FLJ00038  | hypothetical protein LOC728439                                                                 | -2,04 | 3,57 |
| 235546_at    | hs.233950 | SPINT1    | Serine peptidase inhibitor, Kunitz type 1                                                      | -2,04 | 3,57 |
| 233905_at    | hs.375186 | SPAG4L    | sperm associated antigen 4-like                                                                | -2,05 | 3,57 |
| 1553640_at   | hs.666146 | XKR6      | XK, Kell blood group complex subunit-related family, member 6                                  | -2,16 | 3,57 |
| 234467_at    | hs.666808 | ATAD1     | TNF receptor homolog                                                                           | -2,16 | 3,57 |
| 224179_s_at  | hs.129227 | MIOX      | myo-inositol oxygenase                                                                         | -2,20 | 3,57 |
| 240068_at    | hs.106234 | C21orf130 | chromosome 21 open reading frame 130                                                           | -2,27 | 3,57 |
| 202206_at    | hs.655990 | ARL4C     | ADP-ribosylation factor-like 4C                                                                | -2,56 | 3,57 |
| 225799_at    | hs.652166 | MGC4677   | hypothetical protein MGC4677                                                                   | -2,67 | 3,57 |
| 231655_x_at  | ---       | ---       | ---                                                                                            | -4,47 | 3,57 |
| 207543_s_at  | hs.500047 | P4HA1     | procollagen-proline, 2-oxoglutarate 4-dioxygenase (proline 4-hydroxylase), alpha polypeptide I | -1,60 | 4,08 |
| 201374_x_at  | hs.491440 | PPP2CB    | protein phosphatase 2 (formerly 2A), catalytic subunit, beta isoform                           | -1,65 | 4,08 |
| 243207_at    | hs.658005 | NCOA1     | Transcribed locus                                                                              | -1,71 | 4,08 |
| 211407_at    | hs.532853 | NDUFB7    | NADH dehydrogenase (ubiquinone) 1 beta subcomplex, 7, 18kDa                                    | -1,73 | 4,08 |
| 241999_at    | hs.368171 | SFXN5     | sideroflexin 5                                                                                 | -1,74 | 4,08 |
| 1568706_s_at | hs.584854 | AVIL      | Advillin                                                                                       | -1,74 | 4,08 |
| 243738_at    | hs.208673 | NMNAT3    | nicotinamide nucleotide adenylyltransferase 3                                                  | -1,75 | 4,08 |
| 238639_x_at  | ---       | ---       | hypothetical protein LOC730496                                                                 | -1,75 | 4,08 |
| 214965_at    | hs.374556 | C16orf76  | spermatogenesis associated 2-like                                                              | -1,79 | 4,08 |
| 228203_at    | hs.8526   | B3GNT1    | UDP-GlcNAc:betaGal beta-1,3-N-acetylglucosaminyltransferase 1                                  | -1,80 | 4,08 |
| 208105_at    | hs.658534 | GIPR      | gastric inhibitory polypeptide receptor                                                        | -1,80 | 4,08 |
| 204745_x_at  | hs.433391 | MT1G      | metallothionein 1G                                                                             | -1,81 | 4,08 |
| 222222_s_at  | hs.410683 | HOMER3    | homer homolog 3 (Drosophila)                                                                   | -1,83 | 4,08 |
| 205776_at    | hs.642706 | FMO5      | flavin containing monooxygenase 5                                                              | -1,86 | 4,08 |
| 1555601_at   | ---       | ---       | ---                                                                                            | -1,87 | 4,08 |
| 221373_x_at  | hs.248159 | PSPN      | persephin                                                                                      | -1,88 | 4,08 |
| 236768_at    | ---       | ---       | ---                                                                                            | -1,88 | 4,08 |
| 1569074_at   | hs.295015 | FLJ37078  | hypothetical protein FLJ37078                                                                  | -1,89 | 4,08 |
| 1552879_a_at | hs.175396 | ATOH7     | atonal homolog 7 (Drosophila)                                                                  | -1,91 | 4,08 |



|             |           |                                                     |                                                                                           |       |      |
|-------------|-----------|-----------------------------------------------------|-------------------------------------------------------------------------------------------|-------|------|
| 206296_x_at | hs.95424  | MAP4K1                                              | mitogen-activated protein kinase kinase kinase kinase 1                                   | -1,92 | 4,08 |
| 32541_at    | hs.655661 | PPP3CC                                              | protein phosphatase 3 (formerly 2B), catalytic subunit, gamma isoform                     | -1,94 | 4,08 |
| 214233_at   | hs.460336 | GGA2                                                | Golgi associated, gamma adaptin ear containing, ARF binding protein 2                     | -1,94 | 4,08 |
| 237869_at   | hs.350868 | RP11-151A6.2                                        | hypothetical protein BC004360                                                             | -1,95 | 4,08 |
| 1570451_at  | hs.380027 | C1orf61                                             | Chromosome 1 open reading frame 61                                                        | -1,97 | 4,08 |
| 205200_at   | hs.476092 | CLEC3B                                              | C-type lectin domain family 3, member B                                                   | -1,98 | 4,08 |
| 206077_at   | hs.368588 | KEL                                                 | Kell blood group, metallo-endopeptidase                                                   | -2,03 | 4,08 |
| 210742_at   | hs.127411 | CDC14A                                              | CDC14 cell division cycle 14 homolog A ( <i>S. cerevisiae</i> )                           | -2,03 | 4,08 |
| 1566889_at  | hs.369592 | THADA                                               | Thyroid adenoma associated                                                                | -2,04 | 4,08 |
| 233883_at   | hs.483200 | SNX24                                               | sorting nexin 24                                                                          | -2,05 | 4,08 |
| 236643_s_at | hs.163898 | LOC645321                                           | Hypothetical LOC645321                                                                    | -2,05 | 4,08 |
| 216421_at   | ---       | ---                                                 | ---                                                                                       | -2,06 | 4,08 |
| 219747_at   | hs.90250  | C4orf31                                             | chromosome 4 open reading frame 31                                                        | -2,09 | 4,08 |
| 242375_x_at | ---       | ---                                                 | ---                                                                                       | -2,10 | 4,08 |
| 232539_at   | hs.592573 | MRNA; cDNA DKFZp761H1023 (from clone DKFZp761H1023) | MRNA; cDNA DKFZp761H1023 (from clone DKFZp761H1023)                                       | -2,12 | 4,08 |
| 1559492_at  | hs.90286  | CDNA clone IMAGE                                    | CDNA clone IMAGE:5268696                                                                  | -2,13 | 4,08 |
| 204719_at   | hs.58351  | ABCA8                                               | ATP-binding cassette, sub-family A (ABC1), member 8                                       | -2,13 | 4,08 |
| 205293_x_at | hs.128316 | BAIAP2                                              | BAI1-associated protein 2                                                                 | -2,14 | 4,08 |
| 214825_at   | hs.593580 | (clone CTG-A4) mRNA sequence                        | similar to transmembrane protein 28                                                       | -2,14 | 4,08 |
| 205715_at   | hs.169998 | BST1                                                | bone marrow stromal cell antigen 1                                                        | -2,14 | 4,08 |
| 207810_at   | hs.435782 | F13B                                                | coagulation factor XIII, B polypeptide                                                    | -2,14 | 4,08 |
| 232547_at   | hs.448872 | SNIP                                                | SNAP25-interacting protein                                                                | -2,19 | 4,08 |
| 241254_at   | hs.120893 | JAK1                                                | Transcribed locus                                                                         | -2,20 | 4,08 |
| 229437_at   | hs.662258 | BIC                                                 | BIC transcript                                                                            | -2,21 | 4,08 |
| 244212_at   | hs.664017 | CCNC                                                | Full-length cDNA clone CSODI004YI20 of Placenta Cot 25-normalized of Homo sapiens (human) | -2,23 | 4,08 |

|              |           |                                                          |                                                                                                   |       |      |
|--------------|-----------|----------------------------------------------------------|---------------------------------------------------------------------------------------------------|-------|------|
| 216412_x_at  | hs.449599 | Clone ds1-1 immunoglobulin lambda chain VJ region, (IGL) | Isovaleryl Coenzyme A dehydrogenase                                                               | -2,29 | 4,08 |
| 230189_x_at  | hs.595287 | Transcribed locus                                        | Transcribed locus                                                                                 | -2,33 | 4,08 |
| 206605_at    | hs.997    | P11                                                      | 26 serine protease                                                                                | -2,40 | 4,08 |
| 235719_at    | hs.237642 | KLKB1                                                    | Cytochrome P450, family 4, subfamily V, polypeptide 2                                             | -2,45 | 4,08 |
| 241268_x_at  | hs.580681 | SAMHD1                                                   | SAM domain and HD domain 1                                                                        | -2,51 | 4,08 |
| 238503_at    | hs.28659  | CNIH3                                                    | Cornichon homolog 3 (Drosophila)                                                                  | -2,51 | 4,08 |
| 219474_at    | hs.434247 | C3orf52                                                  | chromosome 3 open reading frame 52                                                                | -2,53 | 4,08 |
| 221346_at    | hs.532661 | OR10J1                                                   | olfactory receptor, family 10, subfamily J, member 1                                              | -2,72 | 4,08 |
| 1552897_a_at | hs.352633 | KCNG3                                                    | potassium voltage-gated channel, subfamily G, member 3                                            | -2,94 | 4,08 |
| 204268_at    | hs.516484 | S100A2                                                   | S100 calcium binding protein A2                                                                   | -3,72 | 4,08 |
| 243780_at    | hs.435736 | CDNA FLJ46553 fis, clone THYMU3038879                    | CDNA FLJ46553 fis, clone THYMU3038879                                                             | -4,85 | 4,08 |
| 214728_x_at  | hs.327527 | SMARCA4                                                  | SWI/SNF related, matrix associated, actin dependent regulator of chromatin, subfamily a, member 4 | -1,62 | 4,73 |
| 207461_at    | ---       | ---                                                      | ---                                                                                               | -1,64 | 4,73 |
| 223852_s_at  | hs.471768 | STK40                                                    | serine/threonine kinase 40                                                                        | -1,72 | 4,73 |
| 1560453_at   | hs.657539 | DOCK7                                                    | MRNA; cDNA DKFZp564G203 (from clone DKFZp564G203)                                                 | -1,72 | 4,73 |
| 233331_at    | hs.637324 | Unknown mRNA sequence                                    | Unknown mRNA sequence                                                                             | -1,73 | 4,73 |
| 224090_s_at  | hs.149168 | TNFRSF19                                                 | tumor necrosis factor receptor superfamily, member 19                                             | -1,73 | 4,73 |
| 202335_s_at  | hs.644421 | UBE2B                                                    | ubiquitin-conjugating enzyme E2B (RAD6 homolog)                                                   | -1,74 | 4,73 |
| 234095_at    | hs.677186 | ATP8B1                                                   | CDNA FLJ13274 fis, clone OVARC1001029                                                             | -1,75 | 4,73 |
| 238645_at    | hs.660646 | VIL2                                                     | Transcribed locus                                                                                 | -1,78 | 4,73 |
| 231454_at    | hs.472492 | PLAC4                                                    | placenta-specific 4                                                                               | -1,78 | 4,73 |
| 212859_x_at  | hs.534330 | MT1E                                                     | metallothionein 1E                                                                                | -1,78 | 4,73 |
| 206461_x_at  | hs.632513 | MT1H                                                     | metallothionein 1H                                                                                | -1,80 | 4,73 |

|             |           |                                             |                                                                                                         |       |      |
|-------------|-----------|---------------------------------------------|---------------------------------------------------------------------------------------------------------|-------|------|
| 206608_s_at | hs.126035 | RPGRIP1                                     | retinitis pigmentosa GTPase regulator interacting protein 1                                             | -1,81 | 4,73 |
| 214865_at   | hs.591379 | DOT1L                                       | DOT1-like, histone H3 methyltransferase (S. cerevisiae)                                                 | -1,86 | 4,73 |
| 210065_s_at | hs.271580 | UPK1B                                       | uroplakin 1B                                                                                            | -1,87 | 4,73 |
| 231191_at   | hs.662423 | ANKMY1                                      | CDNA clone IMAGE:5296329                                                                                | -1,87 | 4,73 |
| 241943_at   | hs.220594 | CCDC58                                      | coiled-coil domain containing 58                                                                        | -1,87 | 4,73 |
| 242148_at   | hs.22575  | BCL6B                                       | B-cell CLL/lymphoma 6, member B (zinc finger protein)                                                   | -1,88 | 4,73 |
| 227690_at   | hs.302352 | GABRB3                                      | gamma-aminobutyric acid (GABA) A receptor, beta 3                                                       | -1,89 | 4,73 |
| 242146_at   | hs.528763 | SNRPA1                                      | Small nuclear ribonucleoprotein polypeptide A'                                                          | -1,90 | 4,73 |
| 1563320_at  | hs.684715 | KIAA0146                                    | Full length insert cDNA clone YU69D10                                                                   | -1,91 | 4,73 |
| 236307_at   | hs.660736 | BACH2                                       | Transcribed locus                                                                                       | -1,96 | 4,73 |
| 242187_s_at | ---       | LOC401356                                   | trinucleotide repeat containing 18                                                                      | -1,96 | 4,73 |
| 243997_x_at | hs.661436 | PSPC1                                       | Transcribed locus                                                                                       | -1,97 | 4,73 |
| 236230_at   | hs.180178 | LONRF1                                      | LON peptidase N-terminal domain and ring finger 1                                                       | -1,97 | 4,73 |
| 205975_s_at | hs.83465  | HOXD1                                       | homeobox D1                                                                                             | -1,98 | 4,73 |
| 228651_at   | hs.449009 | VWA1                                        | von Willebrand factor A domain containing 1                                                             | -1,99 | 4,73 |
| 208452_x_at | hs.123198 | MYO9B                                       | myosin IXB                                                                                              | -2,00 | 4,73 |
| 233485_at   | hs.670741 | DDAH1                                       | CDNA FLJ10266 fis, clone HEMBB1001024                                                                   | -2,00 | 4,73 |
| 229994_at   | hs.594180 | CDNA FLJ39164<br>fis, clone<br>OCBBF2002656 | CDNA FLJ39164 fis, clone OCBBF2002656                                                                   | -2,00 | 4,73 |
| 213869_x_at | hs.653181 | THY1                                        | Thy-1 cell surface antigen                                                                              | -2,01 | 4,73 |
| 217158_at   | hs.591892 | LOC401525                                   | similar to Prostaglandin E2 receptor, EP4 subtype (Prostanoid EP4 receptor) (PGE receptor, EP4 subtype) | -2,03 | 4,73 |
| 220910_at   | hs.369448 | FRAS1                                       | Fraser syndrome 1                                                                                       | -2,07 | 4,73 |
| 227023_at   | hs.668016 | GLI4                                        | GLI-Kruppel family member GLI4                                                                          | -2,12 | 4,73 |
| 240838_s_at | hs.410126 | LOC145837                                   | hypothetical protein LOC145837                                                                          | -2,15 | 4,73 |
| 214844_s_at | hs.656582 | DOK5                                        | docking protein 5                                                                                       | -2,16 | 4,73 |
| 215689_s_at | hs.632235 | SHBG                                        | sex hormone-binding globulin                                                                            | -2,17 | 4,73 |
| 239453_at   | hs.673408 | FNBP1                                       | Transcribed locus                                                                                       | -2,17 | 4,73 |
| 229242_at   | hs.23349  | Transcribed locus                           | Transcribed locus                                                                                       | -2,17 | 4,73 |
| 229714_at   | hs.171001 | HS6ST3                                      | heparan sulfate 6-O-sulfotransferase 3                                                                  | -2,20 | 4,73 |

|              |           |                   |                                                                    |       |      |
|--------------|-----------|-------------------|--------------------------------------------------------------------|-------|------|
| 224412_s_at  | hs.272225 | TRPM6             | transient receptor potential cation channel, subfamily M, member 6 | -2,21 | 4,73 |
| 1556629_a_at | hs.167317 | SNAP25            | Synaptosomal-associated protein, 25kDa                             | -2,25 | 4,73 |
| 238834_at    | hs.633895 | Transcribed locus | Transcribed locus                                                  | -2,26 | 4,73 |
| 231704_at    | hs.654391 | CYP3A4            | Cytochrome P450, family 3, subfamily A, polypeptide 4              | -2,40 | 4,73 |
| 239983_at    | hs.532270 | SLC30A8           | solute carrier family 30 (zinc transporter), member 8              | -2,51 | 4,73 |
| 243254_at    | hs.510172 | HIVEP2            | human immunodeficiency virus type I enhancer binding protein 2     | -2,57 | 4,73 |
| 243097_x_at  | hs.536045 | Transcribed locus | Transcribed locus                                                  | -2,59 | 4,73 |
| 234280_at    | hs.567312 | REG3A             | regenerating islet-derived 3 alpha                                 | -2,70 | 4,73 |
