# Supplementary material
Source: PubMed Central journal article supplement (PMC2723986)
Supplement: ASN.2008111145_8.pdf [file ASN.2008111145_8.pdf]

### Supplemental Table 3

Two-class paired Significance Analysis of Microarrays comparing gene expression between paired pre- and post-transplant kidneys biopsies (N=8).

| Probe Set ID                                                                               | Entrez Gene ID  | Gene Symbol       | Unigene Name                                                                               | Score | Fold Difference | q-value (%) |
|--------------------------------------------------------------------------------------------|-----------------|-------------------|--------------------------------------------------------------------------------------------|-------|-----------------|-------------|
| <b>Probe sets higher expressed in post-transplant biopsies in paired analysis (N=1871)</b> |                 |                   |                                                                                            |       |                 |             |
| 218870_at                                                                                  | 55843           | ARHGAP15          | Rho GTPase activating protein 15                                                           | 7,01  | 3,99            | 0,00        |
| 205304_s_at                                                                                | 3764            | KCNJ8             | potassium inwardly-rectifying channel, subfamily J, member 8                               | 6,30  | 4,50            | 0,00        |
| 1563649_at                                                                                 | --              | --                | --                                                                                         | 6,24  | 3,51            | 0,00        |
| 1567913_at                                                                                 | 541466          | CT45-1            | cancer/testis antigen CT45-1                                                               | 5,90  | 4,21            | 0,00        |
| 203932_at                                                                                  | 3109            | HLA-DMB           | major histocompatibility complex, class II, DM beta                                        | 5,83  | 3,20            | 0,00        |
| 204606_at                                                                                  | 6366            | CCL21             | chemokine (C-C motif) ligand 21                                                            | 5,82  | 10,42           | 0,00        |
| 205898_at                                                                                  | 1524            | CX3CR1            | chemokine (C-X3-C motif) receptor 1                                                        | 5,74  | 8,50            | 0,00        |
| 205303_at                                                                                  | 3764            | KCNJ8             | potassium inwardly-rectifying channel, subfamily J, member 8                               | 5,68  | 6,87            | 0,00        |
| 226841_at                                                                                  | 219972          | MPEG1             | macrophage expressed gene 1                                                                | 5,59  | 3,76            | 0,00        |
| 203923_s_at                                                                                | 1536            | CYBB              | cytochrome b-245, beta polypeptide (chronic granulomatous disease)                         | 5,58  | 4,70            | 0,00        |
| 210135_s_at                                                                                | 6474            | SHOX2             | short stature homeobox 2                                                                   | 5,53  | 5,58            | 0,00        |
| 1562642_at                                                                                 | --              | --                | --                                                                                         | 5,42  | 5,03            | 0,00        |
| 242605_at                                                                                  | 1634            | DCN               | decorin                                                                                    | 5,23  | 3,92            | 0,00        |
| 228750_at                                                                                  | --              | --                | --                                                                                         | 5,21  | 7,22            | 0,00        |
| 201852_x_at                                                                                | 1281            | COL3A1            | collagen, type III, alpha 1 (Ehlers-Danlos syndrome type IV, autosomal dominant)           | 5,10  | 8,46            | 0,00        |
| 217022_s_at                                                                                | 3493///3<br>494 | IGHA1///IGHA<br>2 | immunoglobulin heavy constant alpha 1///immunoglobulin heavy constant alpha 2 (A2m marker) | 5,07  | 9,53            | 0,00        |

|              |        |            |                                                                                  |      |       |      |
|--------------|--------|------------|----------------------------------------------------------------------------------|------|-------|------|
| 202311_s_at  | 1277   | COL1A1     | collagen, type I, alpha 1                                                        | 5,07 | 10,41 | 0,00 |
| 1559889_at   | 440686 | HIST2H3PS2 | histone cluster 2, H3, pseudogene 2                                              | 5,03 | 3,81  | 0,00 |
| 215076_s_at  | 1281   | COL3A1     | collagen, type III, alpha 1 (Ehlers-Danlos syndrome type IV, autosomal dominant) | 4,99 | 9,46  | 0,00 |
| 34210_at     | 1043   | CD52       | CD52 molecule                                                                    | 4,96 | 13,53 | 0,00 |
| 1552701_a_at | 114769 | COP1       | caspase-1 dominant-negative inhibitor pseudo-ICE                                 | 4,93 | 3,47  | 0,00 |
| 212865_s_at  | 7373   | COL14A1    | collagen, type XIV, alpha 1 (undulin)                                            | 4,90 | 8,32  | 0,00 |
| 226311_at    | 9509   | ADAMTS2    | ADAM metalloproteinase with thrombospondin type 1 motif, 2                       | 4,88 | 5,01  | 0,00 |
| 1556499_s_at | 1277   | COL1A1     | collagen, type I, alpha 1                                                        | 4,88 | 5,88  | 0,00 |
| 212067_s_at  | 715    | C1R        | complement component 1, r subcomponent                                           | 4,87 | 2,94  | 0,00 |
| 204162_at    | 10403  | NDC80      | NDC80 homolog, kinetochore complex component ( <i>S. cerevisiae</i> )            | 4,85 | 7,87  | 0,00 |
| 1558834_s_at | 254268 | C1orf62    | chromosome 1 open reading frame 62                                               | 4,84 | 4,73  | 0,00 |
| 201645_at    | 3371   | TNC        | tenascin C (hexabrachion)                                                        | 4,83 | 5,13  | 0,00 |
| 208747_s_at  | 716    | C1S        | complement component 1, s subcomponent                                           | 4,78 | 4,90  | 0,00 |
| 211161_s_at  | 1281   | COL3A1     | collagen, type III, alpha 1 (Ehlers-Danlos syndrome type IV, autosomal dominant) | 4,76 | 4,28  | 0,00 |
| 204829_s_at  | 2350   | FOLR2      | folate receptor 2 (fetal)                                                        | 4,75 | 3,29  | 0,00 |
| 216575_at    | --     | --         | --                                                                               | 4,71 | 3,16  | 0,00 |
| 205987_at    | 911    | CD1C       | CD1c molecule                                                                    | 4,69 | 4,58  | 0,00 |
| 1563074_at   | 255654 | LOC255654  | hypothetical protein LOC255654                                                   | 4,58 | 5,36  | 0,27 |
| 1562111_at   | 9577   | BRE        | brain and reproductive organ-expressed (TNFRSF1A modulator)                      | 4,58 | 5,22  | 0,27 |
| 242878_at    | --     | --         | --                                                                               | 4,57 | 2,61  | 0,27 |
| 202404_s_at  | 1278   | COL1A2     | collagen, type I, alpha 2                                                        | 4,55 | 11,25 | 0,27 |
| 205484_at    | 27240  | SIT1       | signaling threshold regulating transmembrane adaptor 1                           | 4,53 | 14,50 | 0,27 |
| 206392_s_at  | 5918   | RARRES1    | retinoic acid receptor responder (tazarotene induced) 1                          | 4,52 | 3,99  | 0,27 |
| 224964_s_at  | 54331  | GNG2       | guanine nucleotide binding protein (G protein), gamma 2                          | 4,52 | 3,00  | 0,27 |
| 209869_at    | 150    | ADRA2A     | adrenergic, alpha-2A-, receptor                                                  | 4,51 | 9,88  | 0,27 |

|             |        |           |                                                                              |      |       |      |
|-------------|--------|-----------|------------------------------------------------------------------------------|------|-------|------|
| 202310_s_at | 1277   | COL1A1    | collagen, type I, alpha 1                                                    | 4,49 | 5,16  | 0,27 |
| 233633_at   | 79718  | TBL1XR1   | transducin (beta)-like 1X-linked receptor 1                                  | 4,49 | 3,35  | 0,27 |
| 244377_at   | 6509   | SLC1A4    | solute carrier family 1 (glutamate/neutral amino acid transporter), member 4 | 4,48 | 3,08  | 0,27 |
| 1566161_at  | 4212   | MEIS2     | Meis homeobox 2                                                              | 4,47 | 4,30  | 0,27 |
| 1561564_at  | --     | --        | --                                                                           | 4,44 | 4,35  | 0,27 |
| 222838_at   | 57823  | SLAMF7    | SLAM family member 7                                                         | 4,42 | 10,33 | 0,35 |
| 229391_s_at | 441168 | FAM26F    | family with sequence similarity 26, member F                                 | 4,40 | 9,62  | 0,35 |
| 238408_at   | 55074  | OXR1      | oxidation resistance 1                                                       | 4,40 | 3,74  | 0,35 |
| 205859_at   | 9450   | LY86      | lymphocyte antigen 86                                                        | 4,39 | 3,99  | 0,35 |
| 209708_at   | 26002  | MOXD1     | monooxygenase, DBH-like 1                                                    | 4,38 | 5,28  | 0,35 |
| 1561123_at  | 5396   | PRRX1     | paired related homeobox 1                                                    | 4,37 | 9,47  | 0,35 |
| 222895_s_at | 64919  | BCL11B    | B-cell CLL/lymphoma 11B (zinc finger protein)                                | 4,37 | 3,82  | 0,35 |
| 210629_x_at | 7940   | LST1      | leukocyte specific transcript 1                                              | 4,36 | 8,02  | 0,35 |
| 234248_at   | --     | --        | --                                                                           | 4,36 | 3,80  | 0,35 |
| 217147_s_at | 50852  | TRAT1     | T cell receptor associated transmembrane adaptor 1                           | 4,36 | 6,96  | 0,35 |
| 228372_at   | 170371 | C10orf128 | chromosome 10 open reading frame 128                                         | 4,33 | 3,77  | 0,35 |
| 219519_s_at | 6614   | SIGLEC1   | sialic acid binding Ig-like lectin 1, sialoadhesin                           | 4,32 | 4,50  | 0,35 |
| 1569755_at  | --     | --        | --                                                                           | 4,32 | 3,88  | 0,35 |
| 219528_s_at | 64919  | BCL11B    | B-cell CLL/lymphoma 11B (zinc finger protein)                                | 4,32 | 8,63  | 0,35 |
| 238529_at   | 8370   | HIST2H4A  | histone cluster 2, H4a                                                       | 4,31 | 4,56  | 0,35 |
| 244125_at   | 403340 | MGC70870  | hypothetical LOC403340                                                       | 4,30 | 5,95  | 0,35 |
| 232645_at   | 153684 | LOC153684 | hypothetical protein LOC153684                                               | 4,29 | 4,08  | 0,35 |
| 219815_at   | 79690  | GAL3ST4   | galactose-3-O-sulfotransferase 4                                             | 4,28 | 4,99  | 0,35 |
| 204205_at   | 60489  | APOBEC3G  | apolipoprotein B mRNA editing enzyme, catalytic polypeptide-like 3G          | 4,28 | 3,44  | 0,35 |
| 221731_x_at | 1462   | VCAN      | versican                                                                     | 4,28 | 8,11  | 0,35 |
| 243819_at   | 54331  | GNG2      | guanine nucleotide binding protein (G protein), gamma 2                      | 4,27 | 4,47  | 0,35 |

|             |        |           |                                                                                           |      |       |      |
|-------------|--------|-----------|-------------------------------------------------------------------------------------------|------|-------|------|
| 1555852_at  | --     | --        | --                                                                                        | 4,26 | 3,22  | 0,35 |
| 1556516_at  | --     | --        | --                                                                                        | 4,26 | 2,85  | 0,35 |
| 239963_at   | --     | --        | --                                                                                        | 4,26 | 2,80  | 0,35 |
| 205872_x_at | 9659   | PDE4DIP   | phosphodiesterase 4D interacting protein (myomegalin)                                     | 4,26 | 5,03  | 0,35 |
| 204620_s_at | 1462   | VCAN      | versican                                                                                  | 4,24 | 5,17  | 0,35 |
| 211881_x_at | 28831  | IGLJ3     | immunoglobulin lambda joining 3                                                           | 4,23 | 4,58  | 0,35 |
| 220146_at   | 51284  | TLR7      | toll-like receptor 7                                                                      | 4,23 | 7,80  | 0,35 |
| 240988_x_at | --     | --        | --                                                                                        | 4,22 | 6,82  | 0,35 |
| 1561926_at  | --     | --        | --                                                                                        | 4,22 | 5,39  | 0,35 |
| 204661_at   | 1043   | CD52      | CD52 molecule                                                                             | 4,22 | 12,70 | 0,35 |
| 1559289_at  | --     | --        | --                                                                                        | 4,20 | 8,71  | 0,35 |
| 224418_x_at | 5369   | PMCHL1    | pro-melanin-concentrating hormone-like 1                                                  | 4,18 | 2,93  | 0,35 |
| 204279_at   | 5698   | PSMB9     | proteasome (prosome, macropain) subunit, beta type, 9 (large multifunctional peptidase 2) | 4,18 | 4,56  | 0,35 |
| 202947_s_at | 2995   | GYPC      | glycophorin C (Gerbich blood group)                                                       | 4,17 | 2,94  | 0,35 |
| 226789_at   | --     | --        | --                                                                                        | 4,17 | 2,42  | 0,35 |
| 1564391_at  | 5825   | ABCD3     | ATP-binding cassette, sub-family D (ALD), member 3                                        | 4,17 | 3,47  | 0,35 |
| 237117_at   | --     | --        | --                                                                                        | 4,17 | 4,17  | 0,35 |
| 244042_x_at | --     | --        | --                                                                                        | 4,16 | 10,39 | 0,35 |
| 219666_at   | 64231  | MS4A6A    | membrane-spanning 4-domains, subfamily A, member 6A                                       | 4,15 | 4,99  | 0,35 |
| 206960_at   | 2846   | GPR23     | G protein-coupled receptor 23                                                             | 4,15 | 3,64  | 0,35 |
| 244605_at   | 2043   | EPHA4     | EPH receptor A4                                                                           | 4,14 | 5,14  | 0,35 |
| 1559696_at  | --     | --        | --                                                                                        | 4,13 | 5,74  | 0,35 |
| 225655_at   | 29128  | UHRF1     | ubiquitin-like, containing PHD and RING finger domains, 1                                 | 4,12 | 3,24  | 0,35 |
| 225897_at   | 4082   | MARCKS    | myristoylated alanine-rich protein kinase C substrate                                     | 4,11 | 2,62  | 0,52 |
| 216193_at   | 440366 | LOC440366 | hect domain and RLD 2 pseudogene                                                          | 4,09 | 11,32 | 0,52 |
| 214181_x_at | 7940   | LST1      | leukocyte specific transcript 1                                                           | 4,09 | 3,84  | 0,52 |
| 1564259_at  | 9099   | USP2      | ubiquitin specific peptidase 2                                                            | 4,08 | 2,66  | 0,52 |

|              |                                                                |                                                                      |                                                                                                                                                          |      |       |      |
|--------------|----------------------------------------------------------------|----------------------------------------------------------------------|----------------------------------------------------------------------------------------------------------------------------------------------------------|------|-------|------|
| 240890_at    | --                                                             | --                                                                   | --                                                                                                                                                       | 4,08 | 2,59  | 0,52 |
| 205943_at    | 6999                                                           | TDO2                                                                 | tryptophan 2,3-dioxygenase                                                                                                                               | 4,07 | 4,92  | 0,52 |
| 229968_at    | --                                                             | --                                                                   | --                                                                                                                                                       | 4,05 | 3,97  | 0,52 |
| 225975_at    | 54510                                                          | PCDH18                                                               | protocadherin 18                                                                                                                                         | 4,04 | 4,47  | 0,52 |
| 242232_at    | 149401                                                         | LOC149401                                                            | hypothetical protein LOC149401                                                                                                                           | 4,04 | 4,34  | 0,52 |
| 202953_at    | 713                                                            | C1QB                                                                 | complement component 1, q subcomponent, B chain                                                                                                          | 4,04 | 8,66  | 0,52 |
| 201048_x_at  | 5870                                                           | RAB6A                                                                | RAB6A, member RAS oncogene family                                                                                                                        | 4,04 | 1,97  | 0,52 |
| 209040_s_at  | 5696                                                           | PSMB8                                                                | proteasome (prosome, macropain) subunit, beta type, 8 (large multifunctional peptidase 7)                                                                | 4,03 | 3,11  | 0,52 |
| 225016_at    | 147495                                                         | APCDD1                                                               | adenomatosis polyposis coli down-regulated 1                                                                                                             | 4,03 | 4,13  | 0,52 |
| 241945_at    | --                                                             | --                                                                   | --                                                                                                                                                       | 4,03 | 2,50  | 0,52 |
| 1559697_a_at | --                                                             | --                                                                   | --                                                                                                                                                       | 4,03 | 3,16  | 0,52 |
| 234203_at    | 9215                                                           | LARGE                                                                | like-glycosyltransferase                                                                                                                                 | 4,02 | 5,60  | 0,52 |
| 223922_x_at  | 64231                                                          | MS4A6A                                                               | membrane-spanning 4-domains, subfamily A, member 6A                                                                                                      | 4,01 | 4,79  | 0,52 |
| 1554899_s_at | 2207                                                           | FCER1G                                                               | Fc fragment of IgE, high affinity I, receptor for; gamma polypeptide                                                                                     | 4,01 | 4,95  | 0,52 |
| 234179_at    | 313                                                            | AOAH                                                                 | acyloxyacyl hydrolase (neutrophil)                                                                                                                       | 4,00 | 3,96  | 0,52 |
| 208119_s_at  | 81931                                                          | ZNF93                                                                | zinc finger protein 93                                                                                                                                   | 3,99 | 9,45  | 0,52 |
| 235700_at    | 441519//<br>/441520/<br>//441521<br>///54146<br>5///5414<br>66 | RP13-<br>36C9.3///CT45<br>-4///RP13-<br>36C9.6///CT45<br>-6///CT45-1 | cancer/testis antigen CT45-3///cancer/testis antigen CT45-4///cancer/testis antigen CT45-5///cancer/testis antigen CT45-6///cancer/testis antigen CT45-1 | 3,99 | 6,70  | 0,52 |
| 208235_x_at  | 2579                                                           | GAGE7                                                                | G antigen 7                                                                                                                                              | 3,99 | 14,39 | 0,52 |
| 233861_at    | --                                                             | --                                                                   | --                                                                                                                                                       | 3,98 | 5,52  | 0,52 |
| 205381_at    | 10234                                                          | LRRC17                                                               | leucine rich repeat containing 17                                                                                                                        | 3,97 | 2,43  | 0,52 |
| 243986_at    | 144766                                                         | LOC144766                                                            | hypothetical protein LOC144766                                                                                                                           | 3,97 | 4,47  | 0,52 |
| 222940_at    | 6783                                                           | SULT1E1                                                              | sulfotransferase family 1E, estrogen-preferring, member 1                                                                                                | 3,96 | 2,05  | 0,52 |

|             |                                                                                            |                                                                                                |                                                                                                                              |      |       |      |
|-------------|--------------------------------------------------------------------------------------------|------------------------------------------------------------------------------------------------|------------------------------------------------------------------------------------------------------------------------------|------|-------|------|
| 223280_x_at | 64231                                                                                      | MS4A6A                                                                                         | membrane-spanning 4-domains, subfamily A, member 6A                                                                          | 3,96 | 4,37  | 0,52 |
| 1562223_at  | --                                                                                         | --                                                                                             | --                                                                                                                           | 3,96 | 16,84 | 0,52 |
| 232458_at   | --                                                                                         | --                                                                                             | --                                                                                                                           | 3,95 | 3,29  | 0,52 |
| 228094_at   | 120425                                                                                     | AMICA1                                                                                         | adhesion molecule, interacts with CXADR antigen 1                                                                            | 3,95 | 11,70 | 0,52 |
| 1559170_at  | --                                                                                         | --                                                                                             | --                                                                                                                           | 3,95 | 4,14  | 0,52 |
| 233815_at   | 10003                                                                                      | NAALAD2                                                                                        | N-acetylated alpha-linked acidic dipeptidase 2                                                                               | 3,95 | 2,54  | 0,52 |
| 217478_s_at | 3108                                                                                       | HLA-DMA                                                                                        | major histocompatibility complex, class II, DM alpha                                                                         | 3,95 | 2,56  | 0,52 |
| 244348_at   | --                                                                                         | --                                                                                             | --                                                                                                                           | 3,95 | 2,65  | 0,52 |
| 1562992_at  | 79846                                                                                      | FLJ21062                                                                                       | hypothetical protein FLJ21062                                                                                                | 3,94 | 5,69  | 0,52 |
| 210176_at   | 7096                                                                                       | TLR1                                                                                           | toll-like receptor 1                                                                                                         | 3,94 | 1,92  | 0,52 |
| 223930_at   | --                                                                                         | --                                                                                             | --                                                                                                                           | 3,93 | 6,70  | 0,52 |
| 224006_at   | --                                                                                         | --                                                                                             | --                                                                                                                           | 3,92 | 4,40  | 0,52 |
| 244061_at   | 55843                                                                                      | ARHGAP15                                                                                       | Rho GTPase activating protein 15                                                                                             | 3,92 | 4,77  | 0,52 |
| 240734_at   | --                                                                                         | --                                                                                             | --                                                                                                                           | 3,91 | 7,33  | 0,52 |
| 242491_at   | --                                                                                         | --                                                                                             | --                                                                                                                           | 3,91 | 6,71  | 0,52 |
| 206497_at   | 55744                                                                                      | C7orf44                                                                                        | chromosome 7 open reading frame 44                                                                                           | 3,91 | 4,59  | 0,52 |
| 1552908_at  | 148823                                                                                     | C1orf150                                                                                       | chromosome 1 open reading frame 150                                                                                          | 3,90 | 2,56  | 0,52 |
| 218232_at   | 712                                                                                        | C1QA                                                                                           | complement component 1, q subcomponent, A chain                                                                              | 3,90 | 3,95  | 0,52 |
| 207739_s_at | 2543///2<br>574///25<br>75///257<br>6///2577<br>///2578/<br>//2579//<br>/26748//<br>/26749 | GAGE1///GAG<br>E2///GAGE3//<br>/GAGE4///GA<br>GE5///GAGE6/<br>//GAGE7///GA<br>GE7B///GAGE<br>8 | G antigen 1///G antigen 2///G antigen 3///G antigen 4///G antigen 5///G antigen 6///G antigen 7///G antigen 7B///G antigen 8 | 3,89 | 4,38  | 0,52 |
| 221978_at   | 3134                                                                                       | HLA-F                                                                                          | major histocompatibility complex, class I, F                                                                                 | 3,89 | 2,86  | 0,52 |
| 229390_at   | 441168                                                                                     | FAM26F                                                                                         | family with sequence similarity 26, member F                                                                                 | 3,88 | 5,71  | 0,52 |
| 242663_at   | 148189                                                                                     | LOC148189                                                                                      | hypothetical protein LOC148189                                                                                               | 3,87 | 3,00  | 0,52 |

|             |                                                                                         |                                                                                                             |                                                                                                                                                                                                                                          |      |       |      |
|-------------|-----------------------------------------------------------------------------------------|-------------------------------------------------------------------------------------------------------------|------------------------------------------------------------------------------------------------------------------------------------------------------------------------------------------------------------------------------------------|------|-------|------|
| 239309_at   | 1750                                                                                    | DLX6                                                                                                        | distal-less homeobox 6                                                                                                                                                                                                                   | 3,87 | 3,52  | 0,52 |
| 243762_at   | --                                                                                      | --                                                                                                          | --                                                                                                                                                                                                                                       | 3,87 | 5,48  | 0,52 |
| 226630_at   | 55320                                                                                   | C14orf106                                                                                                   | chromosome 14 open reading frame 106                                                                                                                                                                                                     | 3,87 | 2,12  | 0,52 |
| 206415_at   | 7092                                                                                    | TLL1                                                                                                        | tolloid-like 1                                                                                                                                                                                                                           | 3,86 | 2,17  | 0,52 |
| 202748_at   | 2634                                                                                    | GBP2                                                                                                        | guanylate binding protein 2, interferon-inducible                                                                                                                                                                                        | 3,86 | 3,37  | 0,52 |
| 209870_s_at | 321                                                                                     | APBA2                                                                                                       | amyloid beta (A4) precursor protein-binding, family A, member 2 (X11-like)                                                                                                                                                               | 3,85 | 3,38  | 0,57 |
| 211565_at   | 6457                                                                                    | SH3GL3                                                                                                      | SH3-domain GRB2-like 3                                                                                                                                                                                                                   | 3,85 | 8,34  | 0,57 |
| 1561995_at  | --                                                                                      | --                                                                                                          | --                                                                                                                                                                                                                                       | 3,84 | 3,60  | 0,57 |
| 209173_at   | 10551                                                                                   | AGR2                                                                                                        | anterior gradient homolog 2 ( <i>Xenopus laevis</i> )                                                                                                                                                                                    | 3,84 | 3,51  | 0,57 |
| 223501_at   | 10673                                                                                   | TNFSF13B                                                                                                    | tumor necrosis factor (ligand) superfamily, member 13b                                                                                                                                                                                   | 3,84 | 2,37  | 0,57 |
| 217038_at   | --                                                                                      | --                                                                                                          | --                                                                                                                                                                                                                                       | 3,84 | 6,11  | 0,57 |
| 215002_at   | 23117///<br>283846//<br>/348162/<br>//388221<br>///44034<br>5///4403<br>54///613<br>037 | LOC23117///D<br>KFZp547E087/<br>//LOC348162/<br>//LOC388221/<br>//LOC440345/<br>//LOC440354/<br>//LOC613037 | KIAA0220-like protein///hypothetical gene LOC283846///hypothetical protein 348162///NPIP-like locus///hypothetical protein LOC440345///PI-3-kinase-related kinase SMG-1 pseudogene///nuclear pore complex interacting protein pseudogene | 3,83 | 6,20  | 0,57 |
| 230866_at   | 10800                                                                                   | CYSLTR1                                                                                                     | cysteinyl leukotriene receptor 1                                                                                                                                                                                                         | 3,82 | 3,46  | 0,57 |
| 1557762_at  | --                                                                                      | --                                                                                                          | --                                                                                                                                                                                                                                       | 3,82 | 23,35 | 0,57 |
| 237742_at   | --                                                                                      | --                                                                                                          | --                                                                                                                                                                                                                                       | 3,82 | 2,97  | 0,57 |
| 233817_at   | --                                                                                      | --                                                                                                          | --                                                                                                                                                                                                                                       | 3,81 | 5,98  | 0,57 |
| 205528_s_at | 862                                                                                     | RUNX1T1                                                                                                     | runt-related transcription factor 1; translocated to, 1 (cyclin D-related)                                                                                                                                                               | 3,81 | 3,04  | 0,57 |
| 211990_at   | 3113                                                                                    | HLA-DPA1                                                                                                    | major histocompatibility complex, class II, DP alpha 1                                                                                                                                                                                   | 3,81 | 2,19  | 0,57 |
| 240938_at   | --                                                                                      | --                                                                                                          | --                                                                                                                                                                                                                                       | 3,81 | 3,76  | 0,57 |
| 213603_s_at | 5880                                                                                    | RAC2                                                                                                        | ras-related C3 botulinum toxin substrate 2 (rho family, small GTP binding protein Rac2)                                                                                                                                                  | 3,80 | 6,01  | 0,57 |
| 244480_at   | 6925                                                                                    | TCF4                                                                                                        | transcription factor 4                                                                                                                                                                                                                   | 3,80 | 2,76  | 0,57 |

|              |                                                                |                                                                      |                                                                                                                                                          |      |       |      |
|--------------|----------------------------------------------------------------|----------------------------------------------------------------------|----------------------------------------------------------------------------------------------------------------------------------------------------------|------|-------|------|
| 214022_s_at  | 8519                                                           | IFITM1                                                               | interferon induced transmembrane protein 1 (9-27)                                                                                                        | 3,80 | 2,74  | 0,57 |
| 206370_at    | 5294                                                           | PIK3CG                                                               | phosphoinositide-3-kinase, catalytic, gamma polypeptide                                                                                                  | 3,80 | 5,62  | 0,57 |
| 1567912_s_at | 441519//<br>/441520/<br>//441521<br>///54146<br>5///5414<br>66 | RP13-<br>36C9.3///CT45<br>-4///RP13-<br>36C9.6///CT45<br>-6///CT45-1 | cancer/testis antigen CT45-3///cancer/testis antigen CT45-4///cancer/testis antigen CT45-5///cancer/testis antigen CT45-6///cancer/testis antigen CT45-1 | 3,79 | 6,96  | 0,57 |
| 230795_at    | 8370                                                           | HIST2H4A                                                             | histone cluster 2, H4a                                                                                                                                   | 3,79 | 3,21  | 0,57 |
| 1562420_at   | --                                                             | --                                                                   | --                                                                                                                                                       | 3,79 | 2,70  | 0,57 |
| 240502_at    | 84978                                                          | FRMD5                                                                | FERM domain containing 5                                                                                                                                 | 3,79 | 2,73  | 0,57 |
| 237356_at    | 170692                                                         | ADAMTS18                                                             | ADAM metalloproteinase with thrombospondin type 1 motif, 18                                                                                              | 3,78 | 2,86  | 0,57 |
| 202018_s_at  | 4057                                                           | LTF                                                                  | lactotransferrin                                                                                                                                         | 3,78 | 22,25 | 0,57 |
| 224356_x_at  | 64231                                                          | MS4A6A                                                               | membrane-spanning 4-domains, subfamily A, member 6A                                                                                                      | 3,77 | 4,96  | 0,57 |
| 229543_at    | --                                                             | --                                                                   | --                                                                                                                                                       | 3,77 | 5,13  | 0,57 |
| 239783_at    | 55809                                                          | TRERF1                                                               | transcriptional regulating factor 1                                                                                                                      | 3,76 | 3,92  | 0,57 |
| 44673_at     | 6614                                                           | SIGLEC1                                                              | sialic acid binding Ig-like lectin 1, sialoadhesin                                                                                                       | 3,76 | 5,93  | 0,57 |
| 210919_at    | --                                                             | --                                                                   | --                                                                                                                                                       | 3,76 | 3,36  | 0,57 |
| 242468_at    | --                                                             | --                                                                   | --                                                                                                                                                       | 3,76 | 4,52  | 0,57 |
| 226818_at    | 219972                                                         | MPEG1                                                                | macrophage expressed gene 1                                                                                                                              | 3,76 | 3,99  | 0,57 |
| 204359_at    | 23768                                                          | FLRT2                                                                | fibronectin leucine rich transmembrane protein 2                                                                                                         | 3,76 | 2,36  | 0,57 |
| 225681_at    | 115908                                                         | CTHRC1                                                               | collagen triple helix repeat containing 1                                                                                                                | 3,75 | 7,16  | 0,57 |
| 244371_at    | 93627                                                          | MGC16169                                                             | hypothetical protein MGC16169                                                                                                                            | 3,75 | 4,59  | 0,57 |
| 230064_at    | --                                                             | --                                                                   | --                                                                                                                                                       | 3,75 | 4,39  | 0,57 |
| 214836_x_at  | 28299///<br>3514                                               | IGKV1-<br>5///IGKC                                                   | immunoglobulin kappa variable 1-5///immunoglobulin kappa constant                                                                                        | 3,74 | 9,88  | 0,57 |
| 227952_at    | --                                                             | --                                                                   | --                                                                                                                                                       | 3,74 | 2,63  | 0,57 |
| 203416_at    | 963                                                            | CD53                                                                 | CD53 molecule                                                                                                                                            | 3,74 | 4,89  | 0,57 |
| 219574_at    | 55016                                                          | MARCH1                                                               | membrane-associated ring finger (C3HC4) 1                                                                                                                | 3,73 | 4,21  | 0,57 |



|              |        |           |                                                                                              |      |       |      |
|--------------|--------|-----------|----------------------------------------------------------------------------------------------|------|-------|------|
| 243998_at    | 125113 | KRT222P   | keratin 222 pseudogene                                                                       | 3,73 | 4,42  | 0,57 |
| 217643_x_at  | --     | --        | --                                                                                           | 3,72 | 5,45  | 0,57 |
| 215518_at    | 9515   | STXBP5L   | syntaxin binding protein 5-like                                                              | 3,72 | 3,74  | 0,57 |
| 239706_x_at  | 191587 | PLAC7     | placenta-specific 7                                                                          | 3,71 | 3,96  | 0,57 |
| 213247_at    | 79987  | SVEP1     | sushi, von Willebrand factor type A, EGF and pentraxin domain containing 1                   | 3,71 | 3,99  | 0,57 |
| 1562916_at   | --     | --        | --                                                                                           | 3,71 | 4,14  | 0,57 |
| 217648_at    | --     | --        | --                                                                                           | 3,71 | 2,66  | 0,57 |
| 224419_x_at  | 5369   | PMCHL1    | pro-melanin-concentrating hormone-like 1                                                     | 3,71 | 2,40  | 0,57 |
| 1566768_at   | --     | --        | --                                                                                           | 3,71 | 5,43  | 0,57 |
| 1562086_at   | --     | --        | --                                                                                           | 3,70 | 6,06  | 0,57 |
| 230959_at    | 401131 | LOC401131 | hypothetical LOC401131                                                                       | 3,69 | 16,20 | 0,57 |
| 202803_s_at  | 3689   | ITGB2     | integrin, beta 2 (complement component 3 receptor 3 and 4 subunit)                           | 3,69 | 4,83  | 0,57 |
| 204232_at    | 2207   | FCER1G    | Fc fragment of IgE, high affinity I, receptor for; gamma polypeptide                         | 3,69 | 4,02  | 0,57 |
| 1552643_at   | 199777 | ZNF626    | zinc finger protein 626                                                                      | 3,68 | 2,59  | 0,57 |
| 244507_at    | --     | --        | --                                                                                           | 3,67 | 6,78  | 0,57 |
| 216188_at    | 10408  | MYCNOS    | v-myc myelocytomatosis viral related oncogene, neuroblastoma derived (avian) opposite strand | 3,67 | 3,68  | 0,57 |
| 1556288_at   | 284274 | LOC284274 | hypothetical protein LOC284274                                                               | 3,66 | 3,31  | 0,57 |
| 214467_at    | 8477   | GPR65     | G protein-coupled receptor 65                                                                | 3,66 | 4,76  | 0,57 |
| 1557811_a_at | 5579   | PRKCB1    | protein kinase C, beta 1                                                                     | 3,66 | 2,73  | 0,57 |
| 213993_at    | 10418  | SPON1     | spondin 1, extracellular matrix protein                                                      | 3,66 | 3,22  | 0,57 |
| 234805_at    | 84896  | ATAD1     | ATPase family, AAA domain containing 1                                                       | 3,65 | 4,89  | 0,57 |
| 222891_s_at  | 53335  | BCL11A    | B-cell CLL/lymphoma 11A (zinc finger protein)                                                | 3,65 | 6,67  | 0,57 |
| 214574_x_at  | 7940   | LST1      | leukocyte specific transcript 1                                                              | 3,65 | 3,86  | 0,57 |
| 211798_x_at  | 28831  | IGLJ3     | immunoglobulin lambda joining 3                                                              | 3,65 | 5,45  | 0,57 |
| 221730_at    | 1290   | COL5A2    | collagen, type V, alpha 2                                                                    | 3,64 | 3,20  | 0,57 |
| 242197_x_at  | 948    | CD36      | CD36 molecule (thrombospondin receptor)                                                      | 3,64 | 2,64  | 0,57 |
| 1560833_at   | --     | --        | --                                                                                           | 3,64 | 2,26  | 0,57 |

|              |        |           |                                                     |      |       |      |
|--------------|--------|-----------|-----------------------------------------------------|------|-------|------|
| 243824_at    | --     | --        | --                                                  | 3,64 | 6,73  | 0,57 |
| 1569402_at   | 56917  | MEIS3     | Meis homeobox 3                                     | 3,63 | 1,94  | 0,57 |
| 234161_at    | --     | --        | --                                                  | 3,63 | 2,24  | 0,57 |
| 224005_at    | --     | --        | --                                                  | 3,63 | 3,22  | 0,57 |
| 228553_at    | 55740  | ENAH      | enabled homolog (Drosophila)                        | 3,63 | 2,26  | 0,57 |
| 219759_at    | 64167  | LRAP      | leukocyte-derived arginine aminopeptidase           | 3,62 | 4,33  | 0,57 |
| 202902_s_at  | 1520   | CTSS      | cathepsin S                                         | 3,62 | 3,61  | 0,57 |
| 217574_at    | 1006   | CDH8      | cadherin 8, type 2                                  | 3,62 | 2,03  | 0,63 |
| 215784_at    | 913    | CD1E      | CD1e molecule                                       | 3,61 | 5,43  | 0,63 |
| 215217_at    | --     | --        | --                                                  | 3,61 | 10,90 | 0,63 |
| 242202_at    | --     | --        | --                                                  | 3,61 | 4,66  | 0,63 |
| 202403_s_at  | 1278   | COL1A2    | collagen, type I, alpha 2                           | 3,61 | 4,41  | 0,63 |
| 225646_at    | 1075   | CTSC      | cathepsin C                                         | 3,61 | 2,13  | 0,63 |
| 232724_at    | 64231  | MS4A6A    | membrane-spanning 4-domains, subfamily A, member 6A | 3,61 | 6,36  | 0,63 |
| 215133_s_at  | --     | --        | --                                                  | 3,61 | 7,58  | 0,63 |
| 1561591_at   | --     | --        | --                                                  | 3,60 | 3,22  | 0,63 |
| 1556783_a_at | 91012  | LASS5     | LAG1 homolog, ceramide synthase 5                   | 3,60 | 2,83  | 0,63 |
| 228376_at    | 2681   | GGTA1     | glycoprotein, alpha-galactosyltransferase 1         | 3,60 | 2,34  | 0,63 |
| 230980_x_at  | --     | --        | --                                                  | 3,60 | 39,92 | 0,63 |
| 237912_at    | 55466  | DNAJA4    | DnaJ (Hsp40) homolog, subfamily A, member 4         | 3,60 | 3,26  | 0,63 |
| 243766_s_at  | 8463   | TEAD2     | TEA domain family member 2                          | 3,60 | 2,30  | 0,63 |
| 216469_at    | 441955 | LOC441955 | PRED65                                              | 3,59 | 3,91  | 0,63 |
| 1557617_at   | --     | --        | --                                                  | 3,58 | 2,21  | 0,63 |
| 211582_x_at  | 7940   | LST1      | leukocyte specific transcript 1                     | 3,58 | 6,17  | 0,63 |
| 1556666_a_at | 115669 | TTC6      | tetratricopeptide repeat domain 6                   | 3,58 | 2,13  | 0,63 |
| 233249_at    | --     | --        | --                                                  | 3,58 | 6,03  | 0,63 |
| 1561489_at   | --     | --        | --                                                  | 3,58 | 4,22  | 0,63 |
| 204912_at    | 3587   | IL10RA    | interleukin 10 receptor, alpha                      | 3,57 | 3,53  | 0,63 |
| 238066_at    | 116362 | RBP7      | retinol binding protein 7, cellular                 | 3,57 | 5,26  | 0,63 |

|              |        |               |                                                                                                        |      |       |      |
|--------------|--------|---------------|--------------------------------------------------------------------------------------------------------|------|-------|------|
| 228362_s_at  | 441168 | FAM26F        | family with sequence similarity 26, member F                                                           | 3,56 | 5,65  | 0,63 |
| 217984_at    | 8635   | RNASET2       | ribonuclease T2                                                                                        | 3,56 | 2,53  | 0,63 |
| 215736_at    | --     | --            | --                                                                                                     | 3,56 | 4,40  | 0,63 |
| 201506_at    | 7045   | TGFBI         | transforming growth factor, beta-induced, 68kDa                                                        | 3,55 | 3,98  | 0,63 |
| 233859_at    | 145508 | C14orf145     | chromosome 14 open reading frame 145                                                                   | 3,55 | 2,08  | 0,63 |
| 203423_at    | 5947   | RBP1          | retinol binding protein 1, cellular                                                                    | 3,55 | 2,28  | 0,63 |
| 204774_at    | 2123   | EVI2A         | ecotropic viral integration site 2A                                                                    | 3,55 | 3,62  | 0,63 |
| 1570155_at   | --     | --            | --                                                                                                     | 3,55 | 8,25  | 0,63 |
| 1558444_at   | --     | --            | --                                                                                                     | 3,55 | 7,21  | 0,63 |
| 243674_at    | 401522 | RP11-160N1.10 | hypothetical LOC401522                                                                                 | 3,54 | 2,49  | 0,63 |
| 1554820_at   | 340351 | AGBL3         | ATP/GTP binding protein-like 3                                                                         | 3,54 | 2,96  | 0,63 |
| 235891_at    | --     | --            | --                                                                                                     | 3,54 | 2,20  | 0,63 |
| 237937_x_at  | --     | --            | --                                                                                                     | 3,54 | 8,35  | 0,63 |
| 1568646_x_at | 7757   | ZNF208        | zinc finger protein 208                                                                                | 3,54 | 2,78  | 0,63 |
| 242002_at    | 154215 | TCBA1         | T-cell lymphoma breakpoint associated target 1                                                         | 3,53 | 2,66  | 0,63 |
| 1555135_at   | --     | --            | --                                                                                                     | 3,53 | 3,78  | 0,63 |
| 1569583_at   | --     | --            | --                                                                                                     | 3,53 | 1,82  | 0,63 |
| 203104_at    | 1436   | CSF1R         | colony stimulating factor 1 receptor, formerly McDonough feline sarcoma viral (v-fms) oncogene homolog | 3,53 | 2,54  | 0,63 |
| 202954_at    | 11065  | UBE2C         | ubiquitin-conjugating enzyme E2C                                                                       | 3,53 | 3,17  | 0,63 |
| 229383_at    | 55016  | MARCH1        | membrane-associated ring finger (C3HC4) 1                                                              | 3,53 | 6,83  | 0,63 |
| 242755_at    | 6733   | SRPK2         | SFRS protein kinase 2                                                                                  | 3,53 | 3,74  | 0,63 |
| 1569712_at   | --     | --            | --                                                                                                     | 3,52 | 5,54  | 0,81 |
| 209670_at    | 28755  | TRAC          | T cell receptor alpha constant                                                                         | 3,51 | 4,24  | 0,81 |
| 231597_x_at  | --     | --            | --                                                                                                     | 3,51 | 21,21 | 0,81 |
| 209612_s_at  | 125    | ADH1B         | alcohol dehydrogenase IB (class I), beta polypeptide                                                   | 3,51 | 6,40  | 0,81 |
| 241132_at    | --     | --            | --                                                                                                     | 3,51 | 4,09  | 0,81 |
| 204913_s_at  | 6664   | SOX11         | SRY (sex determining region Y)-box 11                                                                  | 3,50 | 5,78  | 0,81 |

|             |                 |                 |                                                                                   |      |       |      |
|-------------|-----------------|-----------------|-----------------------------------------------------------------------------------|------|-------|------|
| 201438_at   | 1293            | COL6A3          | collagen, type VI, alpha 3                                                        | 3,50 | 3,47  | 0,81 |
| 217003_s_at | 255926          | ADAM5P          | ADAM metallopeptidase domain 5 pseudogene                                         | 3,49 | 14,23 | 0,81 |
| 216366_x_at | 28793           | IGLV3-25        | immunoglobulin lambda variable 3-25                                               | 3,49 | 14,75 | 0,81 |
| 217143_s_at | 6955///6<br>964 | TRA@///TRD<br>@ | T cell receptor alpha locus///T cell receptor delta locus                         | 3,49 | 16,38 | 0,81 |
| 1570246_at  | --              | --              | --                                                                                | 3,49 | 2,36  | 0,81 |
| 207734_at   | 54900           | LAX1            | lymphocyte transmembrane adaptor 1                                                | 3,48 | 2,66  | 0,81 |
| 225841_at   | 113802          | C1orf59         | chromosome 1 open reading frame 59                                                | 3,48 | 2,59  | 0,81 |
| 202688_at   | 8743            | TNFSF10         | tumor necrosis factor (ligand) superfamily, member 10                             | 3,47 | 2,01  | 0,81 |
| 220205_at   | 7179            | TPTE            | transmembrane phosphatase with tensin homology                                    | 3,47 | 2,92  | 0,81 |
| 207870_at   | 10142           | AKAP9           | A kinase (PRKA) anchor protein (yotiao) 9                                         | 3,47 | 5,37  | 0,81 |
| 1562389_at  | --              | --              | --                                                                                | 3,47 | 4,87  | 0,81 |
| 202391_at   | 10409           | BASP1           | brain abundant, membrane attached signal protein 1                                | 3,46 | 2,08  | 0,81 |
| 240468_at   | --              | --              | --                                                                                | 3,46 | 4,63  | 0,81 |
| 219700_at   | 57125           | PLXDC1          | plexin domain containing 1                                                        | 3,45 | 3,32  | 0,81 |
| 235406_x_at | --              | --              | --                                                                                | 3,45 | 1,72  | 0,81 |
| 216917_s_at | 6847            | SYCP1           | synaptonemal complex protein 1                                                    | 3,45 | 4,63  | 0,81 |
| 215633_x_at | 7940            | LST1            | leukocyte specific transcript 1                                                   | 3,45 | 6,20  | 0,81 |
| 211581_x_at | 7940            | LST1            | leukocyte specific transcript 1                                                   | 3,45 | 7,18  | 0,81 |
| 214549_x_at | 6698            | SPRR1A          | small proline-rich protein 1A                                                     | 3,45 | 1,81  | 0,81 |
| 206565_x_at | --              | --              | --                                                                                | 3,45 | 2,17  | 0,81 |
| 223949_at   | 64699           | TMPRSS3         | transmembrane protease, serine 3                                                  | 3,45 | 3,14  | 0,81 |
| 227689_at   | 7770            | ZNF227          | zinc finger protein 227                                                           | 3,45 | 2,05  | 0,81 |
| 202766_s_at | 2200            | FBN1            | fibrillin 1                                                                       | 3,45 | 6,17  | 0,81 |
| 244556_at   | 3937            | LCP2            | lymphocyte cytosolic protein 2 (SH2 domain containing leukocyte protein of 76kDa) | 3,44 | 2,73  | 0,81 |
| 235606_at   | 344595          | LOC344595       | hypothetical LOC344595                                                            | 3,44 | 5,74  | 0,81 |
| 205890_s_at | 10537           | UBD             | ubiquitin D                                                                       | 3,44 | 4,36  | 0,81 |
| 1562613_at  | --              | --              | --                                                                                | 3,44 | 13,48 | 0,81 |
| 244429_at   | --              | --              | --                                                                                | 3,44 | 3,01  | 0,81 |

|             |                                                       |                                                               |                                                                                                                                                                                 |      |       |      |
|-------------|-------------------------------------------------------|---------------------------------------------------------------|---------------------------------------------------------------------------------------------------------------------------------------------------------------------------------|------|-------|------|
| 1568644_at  | 7757                                                  | ZNF208                                                        | zinc finger protein 208                                                                                                                                                         | 3,44 | 7,10  | 0,81 |
| 237596_at   | --                                                    | --                                                            | --                                                                                                                                                                              | 3,43 | 6,16  | 0,81 |
| 206420_at   | 10261                                                 | IGSF6                                                         | immunoglobulin superfamily, member 6                                                                                                                                            | 3,43 | 3,96  | 0,81 |
| 1557849_at  | --                                                    | --                                                            | --                                                                                                                                                                              | 3,42 | 4,35  | 0,81 |
| 1562760_at  | --                                                    | --                                                            | --                                                                                                                                                                              | 3,42 | 6,01  | 0,91 |
| 239723_at   | 30061                                                 | SLC40A1                                                       | solute carrier family 40 (iron-regulated transporter), member 1                                                                                                                 | 3,42 | 2,66  | 0,91 |
| 225353_s_at | 714                                                   | C1QC                                                          | complement component 1, q subcomponent, C chain                                                                                                                                 | 3,42 | 2,93  | 0,91 |
| 211796_s_at | 28566///<br>28568///<br>28611///<br>28619///<br>28639 | TRBV21-<br>1///TRBV19///<br>TRBV5-<br>4///TRBV3-<br>1///TRBC1 | T cell receptor beta variable 21-1///T cell receptor beta variable 19///T cell receptor beta variable 5-4///T cell receptor beta variable 3-1///T cell receptor beta constant 1 | 3,41 | 16,16 | 0,91 |
| 1560905_at  | 1993                                                  | ELAVL2                                                        | ELAV (embryonic lethal, abnormal vision, Drosophila)-like 2 (Hu antigen B)                                                                                                      | 3,41 | 7,84  | 0,91 |
| 1569858_at  | --                                                    | --                                                            | --                                                                                                                                                                              | 3,41 | 2,60  | 0,91 |
| 208106_x_at | 5675                                                  | PSG6                                                          | pregnancy specific beta-1-glycoprotein 6                                                                                                                                        | 3,40 | 4,40  | 0,91 |
| 1561214_at  | --                                                    | --                                                            | --                                                                                                                                                                              | 3,40 | 3,24  | 0,91 |
| 216401_x_at | 3514                                                  | IGKC                                                          | immunoglobulin kappa constant                                                                                                                                                   | 3,40 | 19,14 | 0,91 |
| 1553472_at  | 150596                                                | FLJ32955                                                      | hypothetical protein FLJ32955                                                                                                                                                   | 3,40 | 5,03  | 0,91 |
| 243892_at   | --                                                    | --                                                            | --                                                                                                                                                                              | 3,40 | 2,96  | 0,91 |
| 238577_s_at | --                                                    | --                                                            | --                                                                                                                                                                              | 3,39 | 3,92  | 0,91 |
| 207663_x_at | 2575                                                  | GAGE3                                                         | G antigen 3                                                                                                                                                                     | 3,39 | 3,89  | 0,91 |
| 218600_at   | 80774                                                 | LIMD2                                                         | LIM domain containing 2                                                                                                                                                         | 3,39 | 3,57  | 0,91 |
| 1556180_at  | --                                                    | --                                                            | --                                                                                                                                                                              | 3,39 | 2,17  | 0,91 |
| 1563568_at  | --                                                    | --                                                            | --                                                                                                                                                                              | 3,39 | 10,54 | 0,91 |
| 1566544_at  | --                                                    | --                                                            | --                                                                                                                                                                              | 3,39 | 6,16  | 0,91 |
| 214018_at   | 23426                                                 | GRIP1                                                         | glutamate receptor interacting protein 1                                                                                                                                        | 3,39 | 3,32  | 0,91 |
| 236024_at   | 2823                                                  | GPM6A                                                         | glycoprotein M6A                                                                                                                                                                | 3,38 | 2,94  | 0,91 |
| 211645_x_at | --                                                    | --                                                            | --                                                                                                                                                                              | 3,38 | 15,12 | 0,91 |
| 224127_at   | --                                                    | --                                                            | --                                                                                                                                                                              | 3,38 | 1,86  | 0,91 |
| 1552696_at  | 123606                                                | NIPA1                                                         | non imprinted in Prader-Willi/Angelman syndrome 1                                                                                                                               | 3,38 | 1,91  | 0,91 |

|              |                     |                          |                                                                                   |      |       |      |
|--------------|---------------------|--------------------------|-----------------------------------------------------------------------------------|------|-------|------|
| 209466_x_at  | 5764                | PTN                      | pleiotrophin (heparin binding growth factor 8, neurite growth-promoting factor 1) | 3,38 | 3,19  | 0,91 |
| 216947_at    | 1674                | DES                      | desmin                                                                            | 3,37 | 3,80  | 0,91 |
| 226723_at    | 374969              | CCDC23                   | coiled-coil domain containing 23                                                  | 3,37 | 2,48  | 0,91 |
| 237220_at    | 222256              | FLJ23834                 | hypothetical protein FLJ23834                                                     | 3,37 | 3,24  | 0,91 |
| 207731_at    | --                  | --                       | --                                                                                | 3,37 | 6,81  | 0,91 |
| 1554780_a_at | 57157               | PHTF2                    | putative homeodomain transcription factor 2                                       | 3,36 | 4,10  | 0,91 |
| 232459_at    | --                  | --                       | --                                                                                | 3,36 | 6,10  | 0,91 |
| 81737_at     | 388221//<br>/440345 | LOC388221//<br>LOC440345 | NPIP-like locus///hypothetical protein LOC440345                                  | 3,35 | 9,18  | 0,91 |
| 1554609_at   | --                  | --                       | --                                                                                | 3,35 | 1,92  | 0,91 |
| 235201_at    | --                  | --                       | --                                                                                | 3,35 | 3,84  | 0,91 |
| 211367_s_at  | 834                 | CASP1                    | caspase 1, apoptosis-related cysteine peptidase (interleukin 1, beta, convertase) | 3,35 | 3,32  | 0,91 |
| 204320_at    | 1301                | COL11A1                  | collagen, type XI, alpha 1                                                        | 3,35 | 3,52  | 0,91 |
| 215758_x_at  | 81931               | ZNF93                    | zinc finger protein 93                                                            | 3,35 | 2,38  | 0,91 |
| 240670_at    | --                  | --                       | --                                                                                | 3,35 | 6,81  | 0,91 |
| 210038_at    | 5588                | PRKCQ                    | protein kinase C, theta                                                           | 3,34 | 4,80  | 0,91 |
| 1570213_at   | --                  | --                       | --                                                                                | 3,34 | 15,63 | 0,91 |
| 1566784_at   | 4905                | NSF                      | N-ethylmaleimide-sensitive factor                                                 | 3,34 | 3,85  | 0,91 |
| 205108_s_at  | 338                 | APOB                     | apolipoprotein B (including Ag(x) antigen)                                        | 3,34 | 1,83  | 0,91 |
| 207133_x_at  | 80216               | ALPK1                    | alpha-kinase 1                                                                    | 3,34 | 13,23 | 0,91 |
| 211751_at    | 9659                | PDE4DIP                  | phosphodiesterase 4D interacting protein (myomegalin)                             | 3,34 | 5,31  | 0,91 |
| 232234_at    | 84174               | SLA2                     | Src-like-adaptor 2                                                                | 3,34 | 9,76  | 0,91 |
| 209374_s_at  | 3507                | IGHM                     | immunoglobulin heavy constant mu                                                  | 3,33 | 12,36 | 0,91 |
| 228679_at    | 84457               | PHYHIPL                  | phytanoyl-CoA 2-hydroxylase interacting protein-like                              | 3,33 | 3,45  | 0,91 |
| 233438_at    | --                  | --                       | --                                                                                | 3,33 | 3,01  | 0,91 |
| 243489_at    | --                  | --                       | --                                                                                | 3,33 | 8,47  | 0,91 |
| 1562527_at   | 283027              | LOC283027                | hypothetical protein LOC283027                                                    | 3,32 | 3,38  | 0,91 |
| 1566863_at   | --                  | --                       | --                                                                                | 3,32 | 5,65  | 0,91 |
| 1567009_at   | 84937               | ZNRF1                    | zinc and ring finger 1                                                            | 3,32 | 2,03  | 1,05 |

|              |                                                                |                                                                    |                                                                                                                                                                                                                                                |      |      |      |
|--------------|----------------------------------------------------------------|--------------------------------------------------------------------|------------------------------------------------------------------------------------------------------------------------------------------------------------------------------------------------------------------------------------------------|------|------|------|
| 1557218_s_at | 2187                                                           | FANCB                                                              | Fanconi anemia, complementation group B                                                                                                                                                                                                        | 3,31 | 2,67 | 1,05 |
| 219684_at    | 64108                                                          | RTP4                                                               | receptor (chemosensory) transporter protein 4                                                                                                                                                                                                  | 3,31 | 3,87 | 1,05 |
| 239144_at    | --                                                             | --                                                                 | --                                                                                                                                                                                                                                             | 3,31 | 2,72 | 1,05 |
| 214677_x_at  | 28793///<br>28815///<br>28831///<br>3535///3<br>537///35<br>38 | IGLV3-<br>25///IGLV2-<br>14///IGLJ3///I<br>GL@///IGLC1/<br>//IGLC2 | immunoglobulin lambda variable 3-25///immunoglobulin lambda variable 2-14///immunoglobulin lambda joining 3///immunoglobulin lambda locus///immunoglobulin lambda constant 1 (Mcg marker)///immunoglobulin lambda constant 2 (Kern-Oz- marker) | 3,31 | 7,63 | 1,05 |
| 1570061_at   | --                                                             | --                                                                 | --                                                                                                                                                                                                                                             | 3,31 | 4,88 | 1,05 |
| 242730_at    | 440952                                                         | FLJ33065                                                           | hypothetical gene supported by AK057627; BC031275; BC045736                                                                                                                                                                                    | 3,31 | 2,95 | 1,05 |
| 215121_x_at  | 28793///<br>28815///<br>3535///3<br>537///35<br>38             | IGLV3-<br>25///IGLV2-<br>14///IGL@///I<br>GLC1///IGLC2             | immunoglobulin lambda variable 3-25///immunoglobulin lambda variable 2-14///immunoglobulin lambda locus///immunoglobulin lambda constant 1 (Mcg marker)///immunoglobulin lambda constant 2 (Kern-Oz- marker)                                   | 3,31 | 8,98 | 1,05 |
| 237719_x_at  | 401190                                                         | RGS7BP                                                             | regulator of G-protein signalling 7 binding protein                                                                                                                                                                                            | 3,31 | 3,49 | 1,05 |
| 205147_x_at  | 4689                                                           | NCF4                                                               | neutrophil cytosolic factor 4, 40kDa                                                                                                                                                                                                           | 3,31 | 3,06 | 1,05 |
| 243905_at    | 387895                                                         | LOC387895                                                          | hypothetical gene supported by BC040060                                                                                                                                                                                                        | 3,30 | 2,31 | 1,05 |
| 232001_at    | 439949                                                         | LOC439949                                                          | hypothetical gene supported by AY007155                                                                                                                                                                                                        | 3,30 | 3,65 | 1,05 |
| 219498_s_at  | 53335                                                          | BCL11A                                                             | B-cell CLL/lymphoma 11A (zinc finger protein)                                                                                                                                                                                                  | 3,30 | 6,17 | 1,05 |
| 1562133_x_at | 7643                                                           | ZNF90                                                              | zinc finger protein 90                                                                                                                                                                                                                         | 3,30 | 2,14 | 1,05 |
| 233579_at    | --                                                             | --                                                                 | --                                                                                                                                                                                                                                             | 3,30 | 6,71 | 1,05 |

|                  |                                                                |                                                                    |                                                                                                                                                                                                                                                            |      |       |      |
|------------------|----------------------------------------------------------------|--------------------------------------------------------------------|------------------------------------------------------------------------------------------------------------------------------------------------------------------------------------------------------------------------------------------------------------|------|-------|------|
| 215379_x_at      | 28793///<br>28815///<br>28831///<br>3535///3<br>537///35<br>38 | IGLV3-<br>25///IGLV2-<br>14///IGLJ3///I<br>GL@///IGLC1/<br>//IGLC2 | immunoglobulin lambda variable 3-25///immunoglobulin lambda variable<br>2-14///immunoglobulin lambda joining 3///immunoglobulin lambda<br>locus///immunoglobulin lambda constant 1 (Mcg<br>marker)///immunoglobulin lambda constant 2 (Kern-Oz-<br>marker) | 3,30 | 7,79  | 1,05 |
| 1553498_at       | 1871                                                           | E2F3                                                               | E2F transcription factor 3                                                                                                                                                                                                                                 | 3,30 | 14,20 | 1,05 |
| 227869_at        | --                                                             | --                                                                 | --                                                                                                                                                                                                                                                         | 3,29 | 2,68  | 1,05 |
| 232034_at        | 203274                                                         | LOC203274                                                          | hypothetical protein LOC203274                                                                                                                                                                                                                             | 3,29 | 8,22  | 1,05 |
| 232606_at        | --                                                             | --                                                                 | --                                                                                                                                                                                                                                                         | 3,29 | 2,69  | 1,05 |
| 201649_at        | 9246                                                           | UBE2L6                                                             | ubiquitin-conjugating enzyme E2L 6                                                                                                                                                                                                                         | 3,29 | 1,95  | 1,05 |
| 242894_at        | --                                                             | --                                                                 | --                                                                                                                                                                                                                                                         | 3,29 | 2,62  | 1,05 |
| 220351_at        | 51554                                                          | CCRL1                                                              | chemokine (C-C motif) receptor-like 1                                                                                                                                                                                                                      | 3,29 | 2,84  | 1,05 |
| 1563674_at       | 79368                                                          | FCRL2                                                              | Fc receptor-like 2                                                                                                                                                                                                                                         | 3,29 | 3,72  | 1,05 |
| 1554225_a_a<br>t | --                                                             | --                                                                 | --                                                                                                                                                                                                                                                         | 3,29 | 2,33  | 1,05 |
| 203325_s_at      | 1289                                                           | COL5A1                                                             | collagen, type V, alpha 1                                                                                                                                                                                                                                  | 3,29 | 6,54  | 1,05 |
| 220298_s_at      | 54558                                                          | SPATA6                                                             | spermatogenesis associated 6                                                                                                                                                                                                                               | 3,28 | 2,77  | 1,05 |
| 1563546_at       | --                                                             | --                                                                 | --                                                                                                                                                                                                                                                         | 3,28 | 7,39  | 1,05 |
| 216406_at        | --                                                             | --                                                                 | --                                                                                                                                                                                                                                                         | 3,28 | 4,78  | 1,05 |
| 230741_at        | --                                                             | --                                                                 | --                                                                                                                                                                                                                                                         | 3,28 | 3,43  | 1,05 |
| 213125_at        | 25903                                                          | OLFML2B                                                            | olfactomedin-like 2B                                                                                                                                                                                                                                       | 3,28 | 4,24  | 1,05 |
| 210889_s_at      | 2213                                                           | FCGR2B                                                             | Fc fragment of IgG, low affinity IIb, receptor (CD32)                                                                                                                                                                                                      | 3,27 | 3,91  | 1,05 |
| 1559280_a_a<br>t | --                                                             | --                                                                 | --                                                                                                                                                                                                                                                         | 3,27 | 15,61 | 1,05 |
| 202659_at        | 5699                                                           | PSMB10                                                             | proteasome (prosome, macropain) subunit, beta type, 10                                                                                                                                                                                                     | 3,27 | 2,21  | 1,05 |
| 234282_at        | --                                                             | --                                                                 | --                                                                                                                                                                                                                                                         | 3,27 | 4,69  | 1,05 |
| 1564567_at       | 10477                                                          | UBE2E3                                                             | ubiquitin-conjugating enzyme E2E 3 (UBC4/5 homolog, yeast)                                                                                                                                                                                                 | 3,26 | 5,62  | 1,05 |
| 231557_at        | --                                                             | --                                                                 | --                                                                                                                                                                                                                                                         | 3,26 | 4,48  | 1,05 |
| 204158_s_at      | 10312                                                          | TCIRG1                                                             | T-cell, immune regulator 1, ATPase, H+ transporting, lysosomal V0<br>subunit A3                                                                                                                                                                            | 3,25 | 2,00  | 1,05 |



|              |                              |                              |                                                                                                                                         |      |       |      |
|--------------|------------------------------|------------------------------|-----------------------------------------------------------------------------------------------------------------------------------------|------|-------|------|
| 222145_at    | 440345                       | LOC440345                    | hypothetical protein LOC440345                                                                                                          | 3,25 | 12,21 | 1,05 |
| 211220_s_at  | 3298                         | HSF2                         | heat shock transcription factor 2                                                                                                       | 3,25 | 7,03  | 1,05 |
| 209138_x_at  | 10901///<br>28793///<br>3538 | DHRS4///IGLV<br>3-25///IGLC2 | dehydrogenase/reductase (SDR family) member 4///immunoglobulin lambda variable 3-25///immunoglobulin lambda constant 2 (Kern-Oz-marker) | 3,25 | 8,82  | 1,05 |
| 1561415_at   | --                           | --                           | --                                                                                                                                      | 3,24 | 3,91  | 1,05 |
| 207345_at    | 10468                        | FST                          | follistatin                                                                                                                             | 3,24 | 2,93  | 1,05 |
| 219497_s_at  | 53335                        | BCL11A                       | B-cell CLL/lymphoma 11A (zinc finger protein)                                                                                           | 3,24 | 2,92  | 1,05 |
| 204820_s_at  | 10384///<br>11118            | BTN3A3///BT<br>N3A2          | butyrophilin, subfamily 3, member A3///butyrophilin, subfamily 3, member A2                                                             | 3,24 | 2,23  | 1,05 |
| 1557861_at   | --                           | --                           | --                                                                                                                                      | 3,24 | 3,71  | 1,05 |
| 242266_x_at  | 286530                       | P2RY8                        | purinergic receptor P2Y, G-protein coupled, 8                                                                                           | 3,23 | 21,64 | 1,05 |
| 1568970_at   | 8749                         | ADAM18                       | ADAM metallopeptidase domain 18                                                                                                         | 3,23 | 3,34  | 1,05 |
| 243689_s_at  | 284802                       | C20orf80                     | chromosome 20 open reading frame 80                                                                                                     | 3,23 | 4,22  | 1,20 |
| 202901_x_at  | 1520                         | CTSS                         | cathepsin S                                                                                                                             | 3,23 | 4,20  | 1,20 |
| 1553633_s_at | 150159                       | NHEDC1                       | Na <sup>+</sup> /H <sup>+</sup> exchanger domain containing 1                                                                           | 3,22 | 2,72  | 1,20 |
| 207570_at    | 6473                         | SHOX                         | short stature homeobox                                                                                                                  | 3,22 | 7,20  | 1,20 |
| 1559336_at   | --                           | --                           | --                                                                                                                                      | 3,22 | 2,54  | 1,20 |
| 217511_at    | 81621                        | KAZALD1                      | Kazal-type serine peptidase inhibitor domain 1                                                                                          | 3,22 | 3,16  | 1,20 |
| 221729_at    | 1290                         | COL5A2                       | collagen, type V, alpha 2                                                                                                               | 3,22 | 2,70  | 1,20 |
| 231149_s_at  | 54986                        | ULK4                         | unc-51-like kinase 4 (C. elegans)                                                                                                       | 3,22 | 5,52  | 1,20 |
| 215542_at    | --                           | --                           | --                                                                                                                                      | 3,21 | 3,37  | 1,20 |
| 203666_at    | 6387                         | CXCL12                       | chemokine (C-X-C motif) ligand 12 (stromal cell-derived factor 1)                                                                       | 3,21 | 2,68  | 1,20 |
| 216708_x_at  | 3538                         | IGLC2                        | immunoglobulin lambda constant 2 (Kern-Oz- marker)                                                                                      | 3,21 | 21,00 | 1,20 |
| 240858_at    | 4052                         | LTBP1                        | latent transforming growth factor beta binding protein 1                                                                                | 3,21 | 2,57  | 1,20 |
| 239237_at    | --                           | --                           | --                                                                                                                                      | 3,21 | 5,27  | 1,20 |
| 224225_s_at  | 51513                        | ETV7                         | ets variant gene 7 (TEL2 oncogene)                                                                                                      | 3,21 | 3,84  | 1,20 |
| 236394_at    | --                           | --                           | --                                                                                                                                      | 3,21 | 3,56  | 1,20 |

|                  |                     |                                |                                                                                                |      |      |      |
|------------------|---------------------|--------------------------------|------------------------------------------------------------------------------------------------|------|------|------|
| 231886_at        | 388572              | LOC388572                      | hypothetical LOC388572                                                                         | 3,21 | 2,94 | 1,20 |
| 206826_at        | 5375                | PMP2                           | peripheral myelin protein 2                                                                    | 3,21 | 3,12 | 1,20 |
| 201601_x_at      | 8519                | IFITM1                         | interferon induced transmembrane protein 1 (9-27)                                              | 3,21 | 1,95 | 1,20 |
| 217384_x_at      | 388255//<br>/440361 | IGHV3OR16-<br>8//LOC44036<br>1 | immunoglobulin heavy variable 3/OR16-8///similar to Ig heavy chain V-III region VH26 precursor | 3,20 | 3,44 | 1,20 |
| 211991_s_at      | 3113                | HLA-DPA1                       | major histocompatibility complex, class II, DP alpha 1                                         | 3,20 | 2,93 | 1,20 |
| 213994_s_at      | 10418               | SPON1                          | spondin 1, extracellular matrix protein                                                        | 3,20 | 3,10 | 1,20 |
| 242912_at        | --                  | --                             | --                                                                                             | 3,19 | 4,37 | 1,20 |
| 205488_at        | 3001                | GZMA                           | granzyme A (granzyme 1, cytotoxic T-lymphocyte-associated serine esterase 3)                   | 3,19 | 6,07 | 1,20 |
| 206978_at        | 1231                | CCR2                           | chemokine (C-C motif) receptor 2                                                               | 3,19 | 5,11 | 1,20 |
| 1569974_x_at     | 441220              | 41518                          | septin 13                                                                                      | 3,18 | 2,44 | 1,20 |
| 213170_at        | 2882                | GPX7                           | glutathione peroxidase 7                                                                       | 3,18 | 3,17 | 1,20 |
| 211518_s_at      | 652                 | BMP4                           | bone morphogenetic protein 4                                                                   | 3,18 | 6,71 | 1,20 |
| 1557481_a_a<br>t | --                  | --                             | --                                                                                             | 3,18 | 4,29 | 1,20 |
| 219932_at        | 28965               | SLC27A6                        | solute carrier family 27 (fatty acid transporter), member 6                                    | 3,18 | 1,99 | 1,20 |
| 1569040_s_at     | --                  | --                             | --                                                                                             | 3,18 | 6,71 | 1,20 |
| 1560372_at       | --                  | --                             | --                                                                                             | 3,17 | 4,11 | 1,20 |
| 1561543_at       | --                  | --                             | --                                                                                             | 3,16 | 6,53 | 1,20 |
| 224422_x_at      | 5370                | PMCHL2                         | pro-melanin-concentrating hormone-like 2                                                       | 3,16 | 3,85 | 1,20 |
| 207605_x_at      | --                  | --                             | --                                                                                             | 3,16 | 2,32 | 1,20 |
| 201288_at        | 397                 | ARHGDI1B                       | Rho GDP dissociation inhibitor (GDI) beta                                                      | 3,16 | 2,12 | 1,20 |
| 207759_s_at      | 27185///<br>400574  | DISC1///C1orf<br>136           | disrupted in schizophrenia 1///chromosome 1 open reading frame 136                             | 3,16 | 2,41 | 1,20 |
| 208344_x_at      | 3447                | IFNA13                         | interferon, alpha 13                                                                           | 3,15 | 2,41 | 1,20 |
| 240418_at        | --                  | --                             | --                                                                                             | 3,15 | 3,51 | 1,20 |
| 208998_at        | 7351                | UCP2                           | uncoupling protein 2 (mitochondrial, proton carrier)                                           | 3,15 | 2,87 | 1,20 |
| 1554964_x_at     | --                  | --                             | --                                                                                             | 3,15 | 2,24 | 1,24 |
| 223313_s_at      | 81557               | MAGED4B                        | melanoma antigen family D, 4B                                                                  | 3,15 | 3,14 | 1,24 |

|              |        |           |                                                                                 |      |       |      |
|--------------|--------|-----------|---------------------------------------------------------------------------------|------|-------|------|
| 1553931_at   | 202459 | LOC202459 | similar to RIKEN cDNA 2310008M10                                                | 3,15 | 8,06  | 1,24 |
| 1558338_at   | 57556  | SEMA6A    | sema domain, transmembrane domain (TM), and cytoplasmic domain, (semaphorin) 6A | 3,15 | 7,79  | 1,24 |
| 216576_x_at  | --     | --        | --                                                                              | 3,14 | 16,87 | 1,24 |
| 216737_at    | --     | --        | --                                                                              | 3,14 | 3,69  | 1,24 |
| 1556195_a_at | --     | --        | --                                                                              | 3,14 | 2,46  | 1,24 |
| 239966_at    | 4208   | MEF2C     | myocyte enhancer factor 2C                                                      | 3,14 | 1,85  | 1,24 |
| 216415_at    | 55567  | DNAH3     | dynein, axonemal, heavy chain 3                                                 | 3,14 | 3,30  | 1,24 |
| 236623_at    | 476    | ATP1A1    | ATPase, Na+/K+ transporting, alpha 1 polypeptide                                | 3,14 | 2,35  | 1,24 |
| 1555826_at   | 332    | BIRC5     | baculoviral IAP repeat-containing 5 (survivin)                                  | 3,14 | 3,53  | 1,24 |
| 1561492_at   | --     | --        | --                                                                              | 3,14 | 2,35  | 1,24 |
| 242916_at    | 11064  | CEP110    | centrosomal protein 110kDa                                                      | 3,13 | 2,82  | 1,24 |
| 230550_at    | 64231  | MS4A6A    | membrane-spanning 4-domains, subfamily A, member 6A                             | 3,13 | 4,68  | 1,24 |
| 1559584_a_at | 283897 | C16orf54  | chromosome 16 open reading frame 54                                             | 3,13 | 3,04  | 1,24 |
| 229625_at    | 115362 | GBP5      | guanylate binding protein 5                                                     | 3,13 | 4,33  | 1,24 |
| 1561902_at   | --     | --        | --                                                                              | 3,13 | 3,13  | 1,24 |
| 1563673_a_at | 151254 | ALS2CR11  | amyotrophic lateral sclerosis 2 (juvenile) chromosome region, candidate 11      | 3,13 | 4,22  | 1,24 |
| 1568934_at   | 1524   | CX3CR1    | chemokine (C-X3-C motif) receptor 1                                             | 3,13 | 3,91  | 1,24 |
| 206837_at    | 8092   | CART1     | cartilage paired-class homeoprotein 1                                           | 3,12 | 14,23 | 1,24 |
| 241030_at    | 161835 | FSIP1     | fibrous sheath interacting protein 1                                            | 3,12 | 3,20  | 1,24 |
| 228656_at    | 5629   | PROX1     | prospero homeobox 1                                                             | 3,12 | 2,63  | 1,24 |
| 221666_s_at  | 29108  | PYCARD    | PYD and CARD domain containing                                                  | 3,12 | 4,95  | 1,24 |
| 1561612_at   | --     | --        | --                                                                              | 3,12 | 3,07  | 1,24 |
| 234712_at    | 56651  | C18orf2   | chromosome 18 open reading frame 2                                              | 3,12 | 3,07  | 1,24 |
| 1560207_at   | 5885   | RAD21     | RAD21 homolog (S. pombe)                                                        | 3,12 | 3,65  | 1,24 |
| 1570506_at   | --     | --        | --                                                                              | 3,12 | 4,83  | 1,24 |
| 1569664_at   | 375010 | LOC375010 | hypothetical LOC375010                                                          | 3,12 | 7,53  | 1,24 |
| 1558964_at   | --     | --        | --                                                                              | 3,11 | 1,90  | 1,24 |
| 212713_at    | 4239   | MFAP4     | microfibrillar-associated protein 4                                             | 3,11 | 3,44  | 1,24 |

|                  |                            |                           |                                                                                                                                                 |      |       |      |
|------------------|----------------------------|---------------------------|-------------------------------------------------------------------------------------------------------------------------------------------------|------|-------|------|
| 228906_at        | 80312                      | CXXC6                     | CXXC finger 6                                                                                                                                   | 3,11 | 2,21  | 1,24 |
| 242119_at        | 5629                       | PROX1                     | prospero homeobox 1                                                                                                                             | 3,11 | 2,71  | 1,24 |
| 222289_at        | 3747                       | KCNC2                     | potassium voltage-gated channel, Shaw-related subfamily, member 2                                                                               | 3,11 | 3,68  | 1,24 |
| 236739_at        | 150622                     | FLJ30594                  | hypothetical locus FLJ30594                                                                                                                     | 3,11 | 1,91  | 1,24 |
| 1563553_at       | --                         | --                        | --                                                                                                                                              | 3,10 | 3,56  | 1,24 |
| 211868_x_at      | 3493///3<br>500///35<br>02 | IGHA1///IGHG<br>1///IGHG3 | immunoglobulin heavy constant alpha 1///immunoglobulin heavy constant gamma 1 (G1m marker)///immunoglobulin heavy constant gamma 3 (G3m marker) | 3,10 | 22,02 | 1,24 |
| 204619_s_at      | 1462                       | VCAN                      | versican                                                                                                                                        | 3,10 | 6,73  | 1,24 |
| 215527_at        | 202559                     | KHDRBS2                   | KH domain containing, RNA binding, signal transduction associated 2                                                                             | 3,10 | 3,56  | 1,24 |
| 232268_at        | 8038                       | ADAM12                    | ADAM metallopeptidase domain 12 (meltrin alpha)                                                                                                 | 3,10 | 3,83  | 1,24 |
| 210915_x_at      | 28568///<br>28639          | TRBV19///TRB<br>C1        | T cell receptor beta variable 19///T cell receptor beta constant 1                                                                              | 3,10 | 15,28 | 1,24 |
| 1562167_a_a<br>t | 245935                     | DEFB122                   | defensin, beta 122                                                                                                                              | 3,10 | 2,19  | 1,24 |
| 211164_at        | 2042                       | EPHA3                     | EPH receptor A3                                                                                                                                 | 3,10 | 6,32  | 1,24 |
| 224426_s_at      | 440888                     | LOC440888                 | ARP3 actin-related protein 3 homolog B pseudogene                                                                                               | 3,09 | 2,62  | 1,24 |
| 1553099_at       | 200765                     | TIGD1                     | tigger transposable element derived 1                                                                                                           | 3,09 | 1,97  | 1,24 |
| 1566862_at       | --                         | --                        | --                                                                                                                                              | 3,09 | 2,77  | 1,24 |
| 202731_at        | 27250                      | PDCD4                     | programmed cell death 4 (neoplastic transformation inhibitor)                                                                                   | 3,09 | 2,38  | 1,24 |
| 227267_at        | 134359                     | C5orf37                   | chromosome 5 open reading frame 37                                                                                                              | 3,09 | 2,08  | 1,24 |
| 210982_s_at      | 3122                       | HLA-DRA                   | major histocompatibility complex, class II, DR alpha                                                                                            | 3,09 | 2,51  | 1,24 |
| 241882_at        | 23261                      | CAMTA1                    | calmodulin binding transcription activator 1                                                                                                    | 3,09 | 3,62  | 1,24 |
| 215039_at        | 339524                     | LOC339524                 | hypothetical protein LOC339524                                                                                                                  | 3,09 | 4,65  | 1,24 |
| 227550_at        | 143381                     | LOC143381                 | hypothetical protein LOC143381                                                                                                                  | 3,08 | 2,35  | 1,24 |
| 206206_at        | 4064                       | CD180                     | CD180 molecule                                                                                                                                  | 3,08 | 4,50  | 1,24 |
| 230983_at        | 199786                     | FAM129C                   | family with sequence similarity 129, member C                                                                                                   | 3,08 | 10,94 | 1,24 |

|              |                     |                           |                                                                                                                                                                      |      |       |      |
|--------------|---------------------|---------------------------|----------------------------------------------------------------------------------------------------------------------------------------------------------------------|------|-------|------|
| 205814_at    | 2913                | GRM3                      | glutamate receptor, metabotropic 3                                                                                                                                   | 3,08 | 4,75  | 1,24 |
| 209671_x_at  | 28755///<br>6955    | TRAC///TRA@               | T cell receptor alpha constant///T cell receptor alpha locus                                                                                                         | 3,08 | 4,72  | 1,24 |
| 214470_at    | 3820                | KLRB1                     | killer cell lectin-like receptor subfamily B, member 1                                                                                                               | 3,08 | 5,77  | 1,24 |
| 228532_at    | 128346              | C1orf162                  | chromosome 1 open reading frame 162                                                                                                                                  | 3,08 | 3,40  | 1,24 |
| 213830_at    | 6964                | TRD@                      | T cell receptor delta locus                                                                                                                                          | 3,07 | 6,80  | 1,24 |
| 207409_at    | 3950                | LECT2                     | leukocyte cell-derived chemotaxin 2                                                                                                                                  | 3,07 | 4,32  | 1,24 |
| 1563341_at   | --                  | --                        | --                                                                                                                                                                   | 3,07 | 4,55  | 1,24 |
| 209762_x_at  | 3431                | SP110                     | SP110 nuclear body protein                                                                                                                                           | 3,07 | 2,12  | 1,24 |
| 209614_at    | 124///12<br>5///126 | ADH1A///ADH<br>1B///ADH1C | alcohol dehydrogenase 1A (class I), alpha polypeptide///alcohol dehydrogenase 1B (class I), beta polypeptide///alcohol dehydrogenase 1C (class I), gamma polypeptide | 3,07 | 4,19  | 1,24 |
| 242385_at    | 6096                | RORB                      | RAR-related orphan receptor B                                                                                                                                        | 3,07 | 2,61  | 1,24 |
| 1553471_at   | 146861              | AMAC1                     | acyl-malonyl condensing enzyme 1                                                                                                                                     | 3,07 | 4,63  | 1,24 |
| 235476_at    | 286827              | TRIM59                    | tripartite motif-containing 59                                                                                                                                       | 3,07 | 2,79  | 1,24 |
| 208894_at    | 3122                | HLA-DRA                   | major histocompatibility complex, class II, DR alpha                                                                                                                 | 3,07 | 2,54  | 1,24 |
| 205174_s_at  | 25797               | QPCT                      | glutaminyl-peptide cyclotransferase (glutaminyl cyclase)                                                                                                             | 3,07 | 2,68  | 1,24 |
| 228368_at    | 57569               | ARHGAP20                  | Rho GTPase activating protein 20                                                                                                                                     | 3,07 | 2,50  | 1,24 |
| 206545_at    | 940                 | CD28                      | CD28 molecule                                                                                                                                                        | 3,07 | 3,33  | 1,24 |
| 221127_s_at  | 10530               | RIG                       | regulated in glioma                                                                                                                                                  | 3,06 | 2,16  | 1,24 |
| 234186_at    | --                  | --                        | --                                                                                                                                                                   | 3,06 | 10,46 | 1,24 |
| 232739_at    | 6689                | SPIB                      | Spi-B transcription factor (Spi-1/PU.1 related)                                                                                                                      | 3,06 | 3,10  | 1,24 |
| 1562083_at   | --                  | --                        | --                                                                                                                                                                   | 3,06 | 6,77  | 1,24 |
| 229218_at    | 1278                | COL1A2                    | collagen, type I, alpha 2                                                                                                                                            | 3,06 | 8,08  | 1,24 |
| 232433_at    | 80726               | KIAA1683                  | KIAA1683                                                                                                                                                             | 3,06 | 1,87  | 1,24 |
| 1552703_s_at | 114769//<br>/834    | COP1///CASP1              | caspase-1 dominant-negative inhibitor pseudo-ICE///caspase 1, apoptosis-related cysteine peptidase (interleukin 1, beta, convertase)                                 | 3,06 | 3,29  | 1,24 |

|              |                    |                               |                                                                                                   |      |      |      |
|--------------|--------------------|-------------------------------|---------------------------------------------------------------------------------------------------|------|------|------|
| 1558755_x_at | 284390             | ZNF763                        | zinc finger protein 763                                                                           | 3,06 | 1,60 | 1,24 |
| 1553146_at   | 152405             | C3orf30                       | chromosome 3 open reading frame 30                                                                | 3,06 | 2,33 | 1,24 |
| 227631_at    | 10152              | ABI2                          | abl interactor 2                                                                                  | 3,06 | 2,00 | 1,24 |
| 213915_at    | 4818               | NKG7                          | natural killer cell group 7 sequence                                                              | 3,06 | 9,48 | 1,24 |
| 217251_x_at  | --                 | --                            | --                                                                                                | 3,05 | 9,16 | 1,24 |
| 229554_at    | 4060               | LUM                           | lumican                                                                                           | 3,05 | 2,61 | 1,49 |
| 228827_at    | 862                | RUNX1T1                       | runt-related transcription factor 1; translocated to, 1 (cyclin D-related)                        | 3,05 | 2,31 | 1,49 |
| 235147_at    | --                 | --                            | --                                                                                                | 3,05 | 8,22 | 1,49 |
| 1561319_at   | --                 | --                            | --                                                                                                | 3,05 | 6,08 | 1,49 |
| 236445_at    | --                 | --                            | --                                                                                                | 3,05 | 2,65 | 1,49 |
| 207485_x_at  | 11119              | BTN3A1                        | butyrophilin, subfamily 3, member A1                                                              | 3,04 | 4,68 | 1,49 |
| 217520_x_at  | 321                | APBA2                         | amyloid beta (A4) precursor protein-binding, family A, member 2 (X11-like)                        | 3,04 | 2,06 | 1,49 |
| 1570266_x_at | --                 | --                            | --                                                                                                | 3,04 | 2,42 | 1,49 |
| 224148_at    | --                 | --                            | --                                                                                                | 3,04 | 2,58 | 1,49 |
| 221044_s_at  | 445372//<br>/53840 | TRIM6-<br>TRIM34///TRI<br>M34 | tripartite motif-containing 6 and tripartite motif-containing 34///tripartite motif-containing 34 | 3,04 | 2,63 | 1,49 |
| 244612_at    | --                 | --                            | --                                                                                                | 3,04 | 8,41 | 1,49 |
| 1563009_at   | 284930             | LOC284930                     | hypothetical protein LOC284930                                                                    | 3,04 | 3,34 | 1,49 |
| 236783_at    | 80333              | KCNIP4                        | Kv channel interacting protein 4                                                                  | 3,04 | 2,19 | 1,49 |
| 234871_at    | 84059              | GPR98                         | G protein-coupled receptor 98                                                                     | 3,04 | 8,40 | 1,49 |
| 214601_at    | 7166               | TPH1                          | tryptophan hydroxylase 1 (tryptophan 5-monooxygenase)                                             | 3,04 | 3,16 | 1,49 |
| 1564444_at   | --                 | --                            | --                                                                                                | 3,03 | 2,09 | 1,49 |
| 204220_at    | 9535               | GMFG                          | glia maturation factor, gamma                                                                     | 3,03 | 2,59 | 1,49 |
| 209891_at    | 57405              | SPC25                         | SPC25, NDC80 kinetochore complex component, homolog (S. cerevisiae)                               | 3,03 | 2,41 | 1,49 |
| 244333_at    | 85462              | KIAA1727                      | KIAA1727 protein                                                                                  | 3,03 | 5,08 | 1,49 |
| 211585_at    | 4863               | NPAT                          | nuclear protein, ataxia-telangiectasia locus                                                      | 3,03 | 2,36 | 1,49 |
| 1563453_at   | --                 | --                            | --                                                                                                | 3,03 | 2,63 | 1,49 |
| 243009_at    | --                 | --                            | --                                                                                                | 3,03 | 2,71 | 1,49 |
| 208782_at    | 11167              | FSTL1                         | follistatin-like 1                                                                                | 3,03 | 1,99 | 1,49 |

|              |                  |                    |                                                                       |      |       |      |
|--------------|------------------|--------------------|-----------------------------------------------------------------------|------|-------|------|
| 1561754_at   | 441057           | FLJ44253           | hypothetical gene supported by AK096952; AK126241; BC068588           | 3,03 | 12,34 | 1,49 |
| 241733_at    | 162681           | C18orf54           | chromosome 18 open reading frame 54                                   | 3,03 | 4,03  | 1,49 |
| 240000_at    | 391269           | C21orf126          | chromosome 21 open reading frame 126                                  | 3,02 | 3,86  | 1,49 |
| 204124_at    | 10568            | SLC34A2            | solute carrier family 34 (sodium phosphate), member 2                 | 3,02 | 6,15  | 1,49 |
| 209613_s_at  | 125              | ADH1B              | alcohol dehydrogenase IB (class I), beta polypeptide                  | 3,02 | 3,34  | 1,49 |
| 213539_at    | 915              | CD3D               | CD3d molecule, delta (CD3-TCR complex)                                | 3,02 | 7,63  | 1,49 |
| 1566102_at   | 23093            | TTL5               | tubulin tyrosine ligase-like family, member 5                         | 3,02 | 2,41  | 1,49 |
| 237233_at    | --               | --                 | --                                                                    | 3,02 | 3,56  | 1,49 |
| 206584_at    | 23643            | LY96               | lymphocyte antigen 96                                                 | 3,02 | 4,30  | 1,49 |
| 241770_x_at  | 114571           | SLC22A9            | solute carrier family 22 (organic anion/cation transporter), member 9 | 3,02 | 4,53  | 1,49 |
| 207056_s_at  | 9498             | SLC4A8             | solute carrier family 4, sodium bicarbonate cotransporter, member 8   | 3,01 | 3,54  | 1,49 |
| 211267_at    | 8820             | HESX1              | HESX homeobox 1                                                       | 3,01 | 2,85  | 1,49 |
| 216207_x_at  | 28902            | IGKV1D-13          | immunoglobulin kappa variable 1D-13                                   | 3,01 | 13,13 | 1,49 |
| 1554963_at   | --               | --                 | --                                                                    | 3,01 | 2,26  | 1,49 |
| 206082_at    | --               | --                 | --                                                                    | 3,01 | 2,42  | 1,49 |
| 1560684_x_at | --               | --                 | --                                                                    | 3,01 | 7,35  | 1,49 |
| 216728_at    | --               | --                 | --                                                                    | 3,01 | 2,26  | 1,49 |
| 233027_at    | 79982            | DNAJB14            | DnaJ (Hsp40) homolog, subfamily B, member 14                          | 3,01 | 2,60  | 1,49 |
| 1570423_at   | --               | --                 | --                                                                    | 3,01 | 2,27  | 1,49 |
| 231598_x_at  | --               | --                 | --                                                                    | 3,01 | 50,80 | 1,49 |
| 213566_at    | 6039             | RNASE6             | ribonuclease, RNase A family, k6                                      | 3,01 | 3,64  | 1,49 |
| 207964_x_at  | 3441             | IFNA4              | interferon, alpha 4                                                   | 3,01 | 4,14  | 1,49 |
| 219607_s_at  | 51338            | MS4A4A             | membrane-spanning 4-domains, subfamily A, member 4                    | 3,01 | 3,44  | 1,49 |
| 221671_x_at  | 28299///<br>3514 | IGKV1-<br>5///IGKC | immunoglobulin kappa variable 1-5///immunoglobulin kappa constant     | 3,01 | 8,91  | 1,49 |
| 231882_at    | 84312            | BRMS1L             | breast cancer metastasis-suppressor 1-like                            | 3,01 | 21,84 | 1,49 |
| 240864_at    | --               | --                 | --                                                                    | 3,00 | 13,11 | 1,49 |

|              |        |           |                                                                     |      |       |      |
|--------------|--------|-----------|---------------------------------------------------------------------|------|-------|------|
| 242494_at    | 23236  | PLCB1     | phospholipase C, beta 1 (phosphoinositide-specific)                 | 3,00 | 3,14  | 1,49 |
| 1554474_a_at | 26002  | MOXD1     | monooxygenase, DBH-like 1                                           | 3,00 | 3,90  | 1,49 |
| 206170_at    | 154    | ADRB2     | adrenergic, beta-2-, receptor, surface                              | 3,00 | 2,56  | 1,49 |
| 233106_at    | 145438 | C14orf82  | chromosome 14 open reading frame 82                                 | 3,00 | 1,72  | 1,49 |
| 1559316_at   | --     | --        | --                                                                  | 3,00 | 6,78  | 1,49 |
| 216412_x_at  | --     | --        | --                                                                  | 3,00 | 4,86  | 1,49 |
| 208306_x_at  | 3123   | HLA-DRB1  | major histocompatibility complex, class II, DR beta 1               | 3,00 | 1,57  | 1,49 |
| 243147_x_at  | --     | --        | --                                                                  | 3,00 | 11,86 | 1,49 |
| 1566428_at   | --     | --        | --                                                                  | 3,00 | 3,26  | 1,49 |
| 1562957_at   | 388685 | FLJ39739  | hypothetical FLJ39739                                               | 3,00 | 3,17  | 1,49 |
| 228607_at    | 4939   | OAS2      | 2'-5'-oligoadenylate synthetase 2, 69/71kDa                         | 2,99 | 2,47  | 1,49 |
| 238362_at    | 5820   | PVT1      | Pvt1 oncogene homolog, MYC activator (mouse)                        | 2,99 | 4,20  | 1,49 |
| 200952_s_at  | 894    | CCND2     | cyclin D2                                                           | 2,99 | 3,68  | 1,49 |
| 204415_at    | 2537   | IFI6      | interferon, alpha-inducible protein 6                               | 2,99 | 4,17  | 1,49 |
| 233788_at    | --     | --        | --                                                                  | 2,99 | 2,95  | 1,49 |
| 234976_x_at  | 57835  | SLC4A5    | solute carrier family 4, sodium bicarbonate cotransporter, member 5 | 2,99 | 1,93  | 1,49 |
| 204057_at    | 3394   | IRF8      | interferon regulatory factor 8                                      | 2,99 | 3,15  | 1,49 |
| 206500_s_at  | 55320  | C14orf106 | chromosome 14 open reading frame 106                                | 2,99 | 3,83  | 1,49 |
| 202730_s_at  | 27250  | PDCD4     | programmed cell death 4 (neoplastic transformation inhibitor)       | 2,99 | 1,82  | 1,49 |
| 232711_at    | --     | --        | --                                                                  | 2,99 | 2,28  | 1,49 |
| 234949_at    | 284802 | C20orf80  | chromosome 20 open reading frame 80                                 | 2,99 | 2,34  | 1,49 |
| 204118_at    | 962    | CD48      | CD48 molecule                                                       | 2,98 | 5,15  | 1,49 |
| 216866_s_at  | 7373   | COL14A1   | collagen, type XIV, alpha 1 (undulin)                               | 2,98 | 2,61  | 1,49 |
| 1558881_at   | 145820 | LOC145820 | hypothetical protein LOC145820                                      | 2,98 | 3,02  | 1,49 |
| 239294_at    | --     | --        | --                                                                  | 2,98 | 2,24  | 1,49 |
| 1555199_at   | 9527   | GOSR1     | golgi SNAP receptor complex member 1                                | 2,98 | 3,69  | 1,49 |
| 206910_x_at  | 3080   | CFHR2     | complement factor H-related 2                                       | 2,98 | 2,83  | 1,49 |
| 229685_at    | --     | --        | --                                                                  | 2,98 | 3,22  | 1,49 |



|                  |        |           |                                                           |      |      |      |
|------------------|--------|-----------|-----------------------------------------------------------|------|------|------|
| 1556984_at       | --     | --        | --                                                        | 2,98 | 2,29 | 1,49 |
| 236650_at        | --     | --        | --                                                        | 2,98 | 4,76 | 1,49 |
| 204821_at        | 10384  | BTN3A3    | butyrophilin, subfamily 3, member A3                      | 2,98 | 3,05 | 1,49 |
| 229621_x_at      | 253738 | EBF3      | early B-cell factor 3                                     | 2,98 | 5,82 | 1,49 |
| 1566424_at       | 55733  | HHAT      | hedgehog acyltransferase                                  | 2,97 | 4,38 | 1,49 |
| 1560683_at       | --     | --        | --                                                        | 2,97 | 2,67 | 1,49 |
| 1557814_a_a<br>t | 23635  | SSBP2     | single-stranded DNA binding protein 2                     | 2,97 | 3,01 | 1,49 |
| 220691_at        | 259230 | SGMS1     | sphingomyelin synthase 1                                  | 2,97 | 2,23 | 1,49 |
| 233273_at        | --     | --        | --                                                        | 2,97 | 4,99 | 1,49 |
| 238107_at        | --     | --        | --                                                        | 2,97 | 3,10 | 1,49 |
| 208283_at        | 2543   | GAGE1     | G antigen 1                                               | 2,97 | 7,41 | 1,49 |
| 238520_at        | 55809  | TRERF1    | transcriptional regulating factor 1                       | 2,97 | 3,44 | 1,49 |
| 1552582_at       | 150000 | ABCC13    | ATP-binding cassette, sub-family C (CFTR/MRP), member 13  | 2,96 | 3,70 | 1,49 |
| 216807_at        | 85452  | KIAA1751  | KIAA1751                                                  | 2,96 | 3,94 | 1,49 |
| 236996_at        | --     | --        | --                                                        | 2,96 | 2,23 | 1,49 |
| 244016_at        | --     | --        | --                                                        | 2,96 | 3,18 | 1,49 |
| 1561364_at       | --     | --        | --                                                        | 2,96 | 8,36 | 1,49 |
| 1563115_at       | --     | --        | --                                                        | 2,96 | 3,30 | 1,49 |
| 207363_at        | 6247   | RS1       | retinoschisis (X-linked, juvenile) 1                      | 2,96 | 3,77 | 1,49 |
| 231234_at        | 1075   | CTSC      | cathepsin C                                               | 2,96 | 2,18 | 1,49 |
| 215176_x_at      | --     | --        | --                                                        | 2,96 | 9,45 | 1,49 |
| 211355_x_at      | 3953   | LEPR      | leptin receptor                                           | 2,96 | 5,41 | 1,49 |
| 231647_s_at      | 83416  | FCRL5     | Fc receptor-like 5                                        | 2,96 | 3,60 | 1,49 |
| 207191_s_at      | 3671   | ISLR      | immunoglobulin superfamily containing leucine-rich repeat | 2,95 | 2,09 | 1,49 |
| 215763_at        | --     | --        | --                                                        | 2,95 | 3,60 | 1,49 |
| 240714_at        | --     | --        | --                                                        | 2,95 | 3,97 | 1,49 |
| 1561098_at       | 641365 | LOC641365 | hypothetical protein LOC641365                            | 2,95 | 3,63 | 1,49 |
| 224403_at        | 83417  | FCRL4     | Fc receptor-like 4                                        | 2,95 | 2,82 | 1,49 |
| 240331_at        | 658    | BMPRI1B   | bone morphogenetic protein receptor, type IB              | 2,95 | 5,43 | 1,49 |
| 220232_at        | 79966  | SCD5      | stearoyl-CoA desaturase 5                                 | 2,95 | 2,83 | 1,49 |
| 1559479_at       | --     | --        | --                                                        | 2,95 | 5,30 | 1,49 |

|             |                  |                    |                                                                                                                                                                                                                |      |      |      |
|-------------|------------------|--------------------|----------------------------------------------------------------------------------------------------------------------------------------------------------------------------------------------------------------|------|------|------|
| 1569610_at  | 64799            | IQCH               | IQ motif containing H                                                                                                                                                                                          | 2,95 | 2,04 | 1,49 |
| 220629_at   | 55539            | KCNQ1DN            | KCNQ1 downstream neighbor                                                                                                                                                                                      | 2,95 | 3,10 | 1,49 |
| 237547_at   | --               | --                 | --                                                                                                                                                                                                             | 2,95 | 3,83 | 1,49 |
| 244156_at   | --               | --                 | --                                                                                                                                                                                                             | 2,94 | 3,01 | 1,49 |
| 228869_at   | 124460           | SLIC1              | selectin ligand interactor cytoplasmic-1                                                                                                                                                                       | 2,94 | 5,01 | 1,49 |
| 226074_at   | 132160           | PPM1M              | protein phosphatase 1M (PP2C domain containing)                                                                                                                                                                | 2,94 | 2,09 | 1,49 |
| 239993_at   | 440367           | LOC440367          | similar to protein phosphatase 2A 48 kDa regulatory subunit isoform 1; serine/threonine protein phosphatase 2A, 48kDa regulatory subunit; PP2A, subunit B, PR48 isoform; PP2A B subunit PR48; NY-REN-8 antigen | 2,94 | 5,11 | 1,49 |
| 220167_s_at | 24150            | TP53TG3            | TP53TG3 protein                                                                                                                                                                                                | 2,94 | 2,61 | 1,49 |
| 221651_x_at | 28299///<br>3514 | IGKV1-<br>5///IGKC | immunoglobulin kappa variable 1-5///immunoglobulin kappa constant                                                                                                                                              | 2,94 | 8,96 | 1,49 |
| 204319_s_at | 6001             | RGS10              | regulator of G-protein signalling 10                                                                                                                                                                           | 2,94 | 2,77 | 1,49 |
| 232035_at   | 8365             | HIST1H4H           | histone cluster 1, H4h                                                                                                                                                                                         | 2,94 | 2,17 | 1,49 |
| 216527_at   | --               | --                 | --                                                                                                                                                                                                             | 2,94 | 3,29 | 1,49 |
| 1562084_at  | --               | --                 | --                                                                                                                                                                                                             | 2,94 | 5,37 | 1,49 |
| 231091_x_at | --               | --                 | --                                                                                                                                                                                                             | 2,94 | 3,65 | 1,87 |
| 238327_at   | 440836           | LOC440836          | similar to MGC52679 protein                                                                                                                                                                                    | 2,94 | 2,76 | 1,87 |
| 201137_s_at | 3115             | HLA-DPB1           | major histocompatibility complex, class II, DP beta 1                                                                                                                                                          | 2,94 | 2,95 | 1,87 |
| 205379_at   | 874              | CBR3               | carbonyl reductase 3                                                                                                                                                                                           | 2,94 | 3,23 | 1,87 |
| 1553607_at  | 193629           | C21orf109          | chromosome 21 open reading frame 109                                                                                                                                                                           | 2,93 | 2,60 | 1,87 |
| 1557895_at  | 400579           | FLJ35934           | FLJ35934 protein                                                                                                                                                                                               | 2,93 | 5,18 | 1,87 |
| 210577_at   | 846              | CASR               | calcium-sensing receptor (hypocalciuric hypercalcemia 1, severe neonatal hyperparathyroidism)                                                                                                                  | 2,93 | 3,48 | 1,87 |
| 1558423_at  | 349114           | LOC349114          | hypothetical LOC349114                                                                                                                                                                                         | 2,93 | 4,76 | 1,87 |
| 217272_s_at | 5275             | SERPINB13          | serpin peptidase inhibitor, clade B (ovalbumin), member 13                                                                                                                                                     | 2,93 | 3,18 | 1,87 |
| 204070_at   | 5920             | RARRES3            | retinoic acid receptor responder (tazarotene induced) 3                                                                                                                                                        | 2,93 | 2,30 | 1,87 |

|             |        |          |                                                            |      |       |      |
|-------------|--------|----------|------------------------------------------------------------|------|-------|------|
| 220456_at   | 55304  | SPTLC3   | serine palmitoyltransferase, long chain base subunit 3     | 2,93 | 3,24  | 1,87 |
| 1562608_at  | 55314  | TMEM144  | transmembrane protein 144                                  | 2,93 | 5,05  | 1,87 |
| 244730_x_at | --     | --       | --                                                         | 2,93 | 2,31  | 1,87 |
| 237436_at   | --     | --       | --                                                         | 2,93 | 2,57  | 1,87 |
| 1561604_at  | --     | --       | --                                                         | 2,93 | 1,96  | 1,87 |
| 1562507_at  | --     | --       | --                                                         | 2,93 | 2,78  | 1,87 |
| 1561238_at  | 5828   | PXMP3    | peroxisomal membrane protein 3, 35kDa (Zellweger syndrome) | 2,92 | 2,07  | 1,87 |
| 242715_at   | --     | --       | --                                                         | 2,92 | 3,67  | 1,87 |
| 233406_at   | 9728   | KIAA0256 | KIAA0256 gene product                                      | 2,92 | 3,06  | 1,87 |
| 226930_at   | 84624  | FNDC1    | fibronectin type III domain containing 1                   | 2,92 | 4,53  | 1,87 |
| 206366_x_at | 6846   | XCL2     | chemokine (C motif) ligand 2                               | 2,92 | 5,67  | 1,87 |
| 239979_at   | 94240  | EPSTI1   | epithelial stromal interaction 1 (breast)                  | 2,92 | 1,91  | 1,87 |
| 1570623_at  | --     | --       | --                                                         | 2,92 | 2,73  | 1,87 |
| 217541_x_at | 125893 | ZNF816A  | zinc finger protein 816A                                   | 2,92 | 2,52  | 1,87 |
| 207152_at   | 4915   | NTRK2    | neurotrophic tyrosine kinase, receptor, type 2             | 2,91 | 6,91  | 1,87 |
| 211148_s_at | 285    | ANGPT2   | angiopoietin 2                                             | 2,91 | 2,53  | 1,87 |
| 1552769_at  | 90589  | ZNF625   | zinc finger protein 625                                    | 2,91 | 3,33  | 1,87 |
| 234632_x_at | 79908  | BTNL8    | butyrophilin-like 8                                        | 2,91 | 8,93  | 1,87 |
| 224095_at   | --     | --       | --                                                         | 2,91 | 3,73  | 1,87 |
| 1559807_at  | 6607   | SMN2     | survival of motor neuron 2, centromeric                    | 2,91 | 2,86  | 1,87 |
| 1566666_at  | 8801   | SUCLG2   | succinate-CoA ligase, GDP-forming, beta subunit            | 2,91 | 2,81  | 1,87 |
| 217138_x_at | 3538   | IGLC2    | immunoglobulin lambda constant 2 (Kern-Oz- marker)         | 2,91 | 21,04 | 1,87 |
| 244067_x_at | 284273 | ZADH2    | zinc binding alcohol dehydrogenase, domain containing 2    | 2,91 | 2,81  | 1,87 |
| 206021_at   | 54581  | SCAND2   | SCAN domain containing 2                                   | 2,91 | 2,57  | 1,87 |
| 1569944_at  | --     | --       | --                                                         | 2,91 | 3,53  | 1,87 |
| 215221_at   | 27086  | FOXP1    | forkhead box P1                                            | 2,90 | 2,01  | 1,87 |
| 228617_at   | 54739  | XAF1     | XIAP associated factor-1                                   | 2,90 | 2,77  | 1,87 |
| 1562755_at  | --     | --       | --                                                         | 2,90 | 5,86  | 1,87 |

|              |                            |                           |                                                                                                                                                 |      |       |      |
|--------------|----------------------------|---------------------------|-------------------------------------------------------------------------------------------------------------------------------------------------|------|-------|------|
| 202687_s_at  | 8743                       | TNFSF10                   | tumor necrosis factor (ligand) superfamily, member 10                                                                                           | 2,90 | 1,78  | 1,87 |
| 234640_x_at  | 79908                      | BTNL8                     | butyrophilin-like 8                                                                                                                             | 2,90 | 3,29  | 1,87 |
| 211731_x_at  | 10214                      | SSX3                      | synovial sarcoma, X breakpoint 3                                                                                                                | 2,90 | 2,41  | 1,87 |
| 215946_x_at  | 91353                      | CTA-246H3.1               | similar to omega protein                                                                                                                        | 2,90 | 3,87  | 1,87 |
| 1557599_a_at | --                         | --                        | --                                                                                                                                              | 2,90 | 2,45  | 1,87 |
| 211616_s_at  | 3356                       | HTR2A                     | 5-hydroxytryptamine (serotonin) receptor 2A                                                                                                     | 2,90 | 2,45  | 1,87 |
| 233022_at    | 80036                      | TRPM3                     | transient receptor potential cation channel, subfamily M, member 3                                                                              | 2,90 | 2,56  | 1,87 |
| 1564383_s_at | 400579                     | FLJ35934                  | FLJ35934 protein                                                                                                                                | 2,89 | 2,43  | 1,87 |
| 1561597_x_at | 84163                      | GTF2IRD2                  | GTF2I repeat domain containing 2                                                                                                                | 2,89 | 3,21  | 1,87 |
| 216557_x_at  | 3493///3<br>500///35<br>02 | IGHA1///IGHG<br>1///IGHG3 | immunoglobulin heavy constant alpha 1///immunoglobulin heavy constant gamma 1 (G1m marker)///immunoglobulin heavy constant gamma 3 (G3m marker) | 2,89 | 2,87  | 1,87 |
| 203892_at    | 10406                      | WFDC2                     | WAP four-disulfide core domain 2                                                                                                                | 2,89 | 2,98  | 1,87 |
| 244696_at    | 3899                       | AFF3                      | AF4/FMR2 family, member 3                                                                                                                       | 2,89 | 2,73  | 1,87 |
| 1556653_at   | 150709                     | ANKAR                     | ankyrin and armadillo repeat containing                                                                                                         | 2,89 | 3,07  | 1,87 |
| 211644_x_at  | 3514                       | IGKC                      | immunoglobulin kappa constant                                                                                                                   | 2,89 | 12,71 | 1,87 |
| 231441_at    | 219557                     | MGC26647                  | hypothetical protein MGC26647                                                                                                                   | 2,89 | 2,75  | 1,87 |
| 235343_at    | 90806                      | ANGEL2                    | angel homolog 2 (Drosophila)                                                                                                                    | 2,89 | 2,10  | 1,87 |
| 212588_at    | 5788                       | PTPRC                     | protein tyrosine phosphatase, receptor type, C                                                                                                  | 2,89 | 3,95  | 1,87 |
| 206641_at    | 608                        | TNFRSF17                  | tumor necrosis factor receptor superfamily, member 17                                                                                           | 2,89 | 2,85  | 1,87 |
| 220850_at    | 27136                      | MORC1                     | MORC family CW-type zinc finger 1                                                                                                               | 2,89 | 2,26  | 1,87 |
| 1563190_at   | --                         | --                        | --                                                                                                                                              | 2,89 | 3,18  | 1,87 |
| 237469_at    | 7153                       | TOP2A                     | topoisomerase (DNA) II alpha 170kDa                                                                                                             | 2,89 | 4,94  | 1,87 |
| 235077_at    | 55384                      | MEG3                      | maternally expressed 3                                                                                                                          | 2,88 | 3,10  | 1,87 |
| 211643_x_at  | 3514                       | IGKC                      | immunoglobulin kappa constant                                                                                                                   | 2,88 | 7,55  | 1,87 |
| 211368_s_at  | 834                        | CASP1                     | caspase 1, apoptosis-related cysteine peptidase (interleukin 1, beta, convertase)                                                               | 2,88 | 3,81  | 1,87 |
| 204122_at    | 7305                       | TYROBP                    | TYRO protein tyrosine kinase binding protein                                                                                                    | 2,88 | 3,01  | 1,87 |
| 234765_at    | --                         | --                        | --                                                                                                                                              | 2,88 | 2,87  | 1,87 |

|              |        |               |                                                               |      |      |      |
|--------------|--------|---------------|---------------------------------------------------------------|------|------|------|
| 241803_s_at  | 401522 | RP11-160N1.10 | hypothetical LOC401522                                        | 2,88 | 2,24 | 1,87 |
| 1561477_at   | 9720   | KIAA0565      | KIAA0565 gene product                                         | 2,87 | 2,76 | 1,87 |
| 228602_at    | 6444   | SGCD          | sarcoglycan, delta (35kDa dystrophin-associated glycoprotein) | 2,87 | 5,38 | 1,87 |
| 212998_x_at  | 3119   | HLA-DQB1      | major histocompatibility complex, class II, DQ beta 1         | 2,87 | 2,69 | 1,87 |
| 234893_s_at  | 200383 | LOC200383     | similar to Dynein heavy chain at 16F                          | 2,87 | 4,84 | 1,87 |
| 239185_at    | 10350  | ABCA9         | ATP-binding cassette, sub-family A (ABC1), member 9           | 2,87 | 1,74 | 1,87 |
| 1557256_a_at | --     | --            | --                                                            | 2,87 | 2,55 | 1,87 |
| 1570491_at   | 9969   | THRAP1        | thyroid hormone receptor associated protein 1                 | 2,87 | 2,24 | 1,87 |
| 1556037_s_at | 64399  | HHIP          | hedgehog interacting protein                                  | 2,87 | 2,80 | 1,87 |
| 232231_at    | 860    | RUNX2         | runt-related transcription factor 2                           | 2,87 | 2,49 | 1,87 |
| 231674_at    | 7363   | UGT2B4        | UDP glucuronosyltransferase 2 family, polypeptide B4          | 2,87 | 2,80 | 1,87 |
| 1555213_a_at | 64581  | CLEC7A        | C-type lectin domain family 7, member A                       | 2,87 | 2,52 | 1,87 |
| 1566854_at   | --     | --            | --                                                            | 2,87 | 2,16 | 1,87 |
| 214669_x_at  | 3514   | IGKC          | immunoglobulin kappa constant                                 | 2,87 | 8,56 | 1,87 |
| 61732_r_at   | 80173  | IFT74         | intraflagellar transport 74 homolog (Chlamydomonas)           | 2,86 | 2,15 | 1,87 |
| 217328_at    | --     | --            | --                                                            | 2,86 | 4,76 | 1,87 |
| 1555598_a_at | 142679 | DUSP19        | dual specificity phosphatase 19                               | 2,86 | 8,83 | 1,87 |
| 228945_s_at  | 64116  | SLC39A8       | solute carrier family 39 (zinc transporter), member 8         | 2,86 | 2,45 | 1,87 |
| 213235_at    | 400506 | LOC400506     | similar to TSG118.1                                           | 2,86 | 2,77 | 1,87 |
| 239481_at    | 286499 | FAM133A       | family with sequence similarity 133, member A                 | 2,86 | 5,16 | 1,87 |
| 212531_at    | 3934   | LCN2          | lipocalin 2 (oncogene 24p3)                                   | 2,86 | 4,70 | 1,87 |
| 216136_at    | 8672   | EIF4G3        | eukaryotic translation initiation factor 4 gamma, 3           | 2,86 | 2,81 | 1,87 |

|                  |                  |              |                                                                                                                         |      |       |      |
|------------------|------------------|--------------|-------------------------------------------------------------------------------------------------------------------------|------|-------|------|
| 233622_x_at      | --               | --           | --                                                                                                                      | 2,85 | 2,75  | 1,87 |
| 204036_at        | 1902             | EDG2         | endothelial differentiation, lysophosphatidic acid G-protein-coupled receptor, 2                                        | 2,85 | 2,34  | 1,87 |
| 240766_at        | --               | --           | --                                                                                                                      | 2,85 | 1,96  | 1,87 |
| 1570264_at       | 23505            | TMEM131      | transmembrane protein 131                                                                                               | 2,85 | 3,40  | 1,87 |
| 239583_x_at      | 191587           | PLAC7        | placenta-specific 7                                                                                                     | 2,85 | 3,35  | 1,87 |
| 216660_at        | 4648             | MYO7B        | myosin VIIB                                                                                                             | 2,85 | 3,92  | 1,87 |
| 230405_at        | --               | --           | --                                                                                                                      | 2,85 | 3,82  | 1,87 |
| 237479_at        | 79582            | SPAG16       | sperm associated antigen 16                                                                                             | 2,85 | 4,15  | 1,87 |
| 226444_at        | 57181            | SLC39A10     | solute carrier family 39 (zinc transporter), member 10                                                                  | 2,85 | 2,64  | 1,87 |
| 213975_s_at      | 10859///<br>4069 | LILRB1///LYZ | leukocyte immunoglobulin-like receptor, subfamily B (with TM and ITIM domains), member 1///lysozyme (renal amyloidosis) | 2,85 | 4,71  | 1,87 |
| 224424_x_at      | 440888           | LOC440888    | ARP3 actin-related protein 3 homolog B pseudogene                                                                       | 2,85 | 3,58  | 1,87 |
| 239534_at        | --               | --           | --                                                                                                                      | 2,85 | 1,83  | 1,87 |
| 217258_x_at      | --               | --           | --                                                                                                                      | 2,85 | 5,72  | 1,87 |
| 1554604_at       | 51360            | MBTPS2       | membrane-bound transcription factor peptidase, site 2                                                                   | 2,85 | 4,96  | 1,87 |
| 208273_at        | 57116            | ZNF695       | zinc finger protein 695                                                                                                 | 2,84 | 2,39  | 1,87 |
| 233282_at        | 81608            | FIP1L1       | FIP1 like 1 (S. cerevisiae)                                                                                             | 2,84 | 3,81  | 1,87 |
| 207536_s_at      | 3604             | TNFRSF9      | tumor necrosis factor receptor superfamily, member 9                                                                    | 2,84 | 2,13  | 1,87 |
| 1558425_x_at     | --               | --           | --                                                                                                                      | 2,84 | 3,06  | 1,87 |
| 215290_at        | --               | --           | --                                                                                                                      | 2,84 | 2,20  | 1,87 |
| 216398_at        | 2994             | GYPB         | glycophorin B (MNS blood group)                                                                                         | 2,84 | 2,62  | 1,87 |
| 217547_x_at      | 171392           | ZNF675       | zinc finger protein 675                                                                                                 | 2,84 | 1,69  | 1,87 |
| 201291_s_at      | 7153             | TOP2A        | topoisomerase (DNA) II alpha 170kDa                                                                                     | 2,84 | 4,23  | 2,20 |
| 214381_at        | 441601           | LOC441601    | septin 7 pseudogene                                                                                                     | 2,84 | 3,19  | 2,20 |
| 237625_s_at      | --               | --           | --                                                                                                                      | 2,84 | 15,05 | 2,20 |
| 1558854_a_a<br>t | 124989           | C17orf57     | chromosome 17 open reading frame 57                                                                                     | 2,84 | 2,29  | 2,20 |
| 1556983_a_a<br>t | --               | --           | --                                                                                                                      | 2,84 | 3,38  | 2,20 |

|             |                  |                    |                                                                   |      |      |      |
|-------------|------------------|--------------------|-------------------------------------------------------------------|------|------|------|
| 1557366_at  | 284047           | FLJ36492           | hypothetical protein FLJ36492                                     | 2,84 | 4,07 | 2,20 |
| 211356_x_at | 3953             | LEPR               | leptin receptor                                                   | 2,84 | 7,93 | 2,20 |
| 203021_at   | 6590             | SLPI               | secretory leukocyte peptidase inhibitor                           | 2,84 | 9,18 | 2,20 |
| 237454_at   | --               | --                 | --                                                                | 2,83 | 4,21 | 2,20 |
| 243610_at   | 138255           | C9orf135           | chromosome 9 open reading frame 135                               | 2,83 | 4,02 | 2,20 |
| 240246_at   | --               | --                 | --                                                                | 2,83 | 3,54 | 2,20 |
| 232182_at   | 286272           | LOC286272          | hypothetical protein LOC286272                                    | 2,83 | 3,27 | 2,20 |
| 214791_at   | 93349            | LOC93349           | hypothetical protein BC004921                                     | 2,83 | 1,84 | 2,20 |
| 233257_at   | --               | --                 | --                                                                | 2,83 | 3,85 | 2,20 |
| 228141_at   | 11163            | NUDT4              | nudix (nucleoside diphosphate linked moiety X)-type motif 4       | 2,83 | 3,20 | 2,20 |
| 224795_x_at | 28299///<br>3514 | IGKV1-<br>5///IGKC | immunoglobulin kappa variable 1-5///immunoglobulin kappa constant | 2,83 | 8,30 | 2,20 |
| 238375_at   | 4197             | MDS1               | myelodysplasia syndrome 1                                         | 2,83 | 4,76 | 2,20 |
| 242762_s_at | 165215           | KIAA1946           | KIAA1946                                                          | 2,83 | 4,01 | 2,20 |
| 215439_x_at | --               | --                 | --                                                                | 2,82 | 5,11 | 2,20 |
| 1554996_at  | 90827            | ZNF479             | zinc finger protein 479                                           | 2,82 | 4,44 | 2,20 |
| 1563561_at  | 6014             | RIT2               | Ras-like without CAAX 2                                           | 2,82 | 2,44 | 2,20 |
| 228628_at   | --               | --                 | --                                                                | 2,82 | 2,97 | 2,20 |
| 1559147_at  | --               | --                 | --                                                                | 2,82 | 2,92 | 2,20 |
| 242101_at   | 23224            | SYNE2              | spectrin repeat containing, nuclear envelope 2                    | 2,82 | 4,46 | 2,20 |
| 243008_at   | 6009             | RHEB               | Ras homolog enriched in brain                                     | 2,82 | 2,04 | 2,20 |
| 230753_at   | 197135           | LOC197135          | hypothetical LOC197135                                            | 2,82 | 4,30 | 2,20 |
| 232962_x_at | --               | --                 | --                                                                | 2,82 | 1,94 | 2,20 |
| 240143_at   | 8745             | ADAM23             | ADAM metallopeptidase domain 23                                   | 2,82 | 2,67 | 2,20 |
| 242455_at   | 5454             | POU3F2             | POU class 3 homeobox 2                                            | 2,82 | 5,02 | 2,20 |
| 233944_at   | --               | --                 | --                                                                | 2,81 | 4,51 | 2,20 |
| 241587_at   | --               | --                 | --                                                                | 2,81 | 2,50 | 2,20 |
| 241654_at   | --               | --                 | --                                                                | 2,81 | 2,31 | 2,20 |
| 233741_at   | 10841            | FTCD               | formiminotransferase cyclodeaminase                               | 2,81 | 3,07 | 2,20 |
| 224342_x_at | --               | --                 | --                                                                | 2,81 | 4,28 | 2,20 |
| 229764_at   | 285386           | FAM79B             | family with sequence similarity 79, member B                      | 2,81 | 9,43 | 2,20 |

|             |        |           |                                                                                                       |      |      |      |
|-------------|--------|-----------|-------------------------------------------------------------------------------------------------------|------|------|------|
| 213475_s_at | 3683   | ITGAL     | integrin, alpha L (antigen CD11A (p180), lymphocyte function-associated antigen 1; alpha polypeptide) | 2,81 | 4,11 | 2,20 |
| 233311_at   | 145845 | LOC145845 | hypothetical protein LOC145845                                                                        | 2,81 | 1,64 | 2,20 |
| 241835_at   | --     | --        | --                                                                                                    | 2,81 | 3,82 | 2,20 |
| 228377_at   | 57565  | KLHL14    | kelch-like 14 (Drosophila)                                                                            | 2,81 | 3,28 | 2,20 |
| 1562777_at  | --     | --        | --                                                                                                    | 2,80 | 2,11 | 2,20 |
| 243106_at   | 160364 | CLEC12A   | C-type lectin domain family 12, member A                                                              | 2,80 | 4,15 | 2,20 |
| 219918_s_at | 259266 | ASPM      | asp (abnormal spindle) homolog, microcephaly associated (Drosophila)                                  | 2,80 | 2,00 | 2,20 |
| 202202_s_at | 3910   | LAMA4     | laminin, alpha 4                                                                                      | 2,80 | 2,33 | 2,20 |
| 240984_at   | 9781   | RNF144    | ring finger protein 144                                                                               | 2,80 | 2,68 | 2,20 |
| 236765_at   | --     | --        | --                                                                                                    | 2,80 | 4,26 | 2,20 |
| 217531_at   | 152189 | CMTM8     | CKLF-like MARVEL transmembrane domain containing 8                                                    | 2,80 | 1,96 | 2,20 |
| 38487_at    | 23166  | STAB1     | stabilin 1                                                                                            | 2,80 | 2,80 | 2,20 |
| 231212_x_at | 6917   | TCEA1     | transcription elongation factor A (SII), 1                                                            | 2,80 | 3,57 | 2,20 |
| 216319_at   | --     | --        | --                                                                                                    | 2,80 | 6,66 | 2,20 |
| 205431_s_at | 653    | BMP5      | bone morphogenetic protein 5                                                                          | 2,79 | 2,24 | 2,20 |
| 1564294_at  | --     | --        | --                                                                                                    | 2,79 | 3,29 | 2,20 |
| 1553674_at  | 127255 | LRRC44    | leucine rich repeat containing 44                                                                     | 2,79 | 2,09 | 2,20 |
| 1561497_at  | --     | --        | --                                                                                                    | 2,79 | 2,17 | 2,20 |
| 1561473_at  | --     | --        | --                                                                                                    | 2,79 | 3,84 | 2,20 |
| 219501_at   | 55068  | ENOX1     | ecto-NOX disulfide-thiol exchanger 1                                                                  | 2,79 | 1,98 | 2,20 |
| 215625_at   | 401131 | LOC401131 | hypothetical LOC401131                                                                                | 2,79 | 3,93 | 2,20 |
| 1556650_at  | --     | --        | --                                                                                                    | 2,79 | 1,95 | 2,20 |
| 242943_at   | 7903   | ST8SIA4   | ST8 alpha-N-acetyl-neuraminide alpha-2,8-sialyltransferase 4                                          | 2,79 | 2,49 | 2,20 |
| 1559514_at  | --     | --        | --                                                                                                    | 2,79 | 6,85 | 2,20 |
| 204728_s_at | 11169  | WDHD1     | WD repeat and HMG-box DNA binding protein 1                                                           | 2,79 | 1,78 | 2,20 |
| 206572_x_at | 7639   | ZNF85     | zinc finger protein 85                                                                                | 2,79 | 1,91 | 2,20 |
| 227384_s_at | --     | --        | --                                                                                                    | 2,79 | 2,12 | 2,20 |
| 1557283_a_a | 162655 | ZNF519    | zinc finger protein 519                                                                               | 2,79 | 2,72 | 2,20 |



| t           |        |           |                                                                                               |      |      |      |
|-------------|--------|-----------|-----------------------------------------------------------------------------------------------|------|------|------|
| 209914_s_at | 9378   | NRXN1     | neurexin 1                                                                                    | 2,79 | 8,40 | 2,20 |
| 234166_at   | 7337   | UBE3A     | ubiquitin protein ligase E3A (human papilloma virus E6-associated protein, Angelman syndrome) | 2,79 | 2,78 | 2,20 |
| 225763_at   | 92241  | RCSD1     | RCSD domain containing 1                                                                      | 2,79 | 2,69 | 2,20 |
| 228273_at   | 55771  | PRR11     | proline rich 11                                                                               | 2,78 | 4,04 | 2,20 |
| 239130_at   | --     | --        | --                                                                                            | 2,78 | 2,06 | 2,20 |
| 233500_x_at | 29121  | CLEC2D    | C-type lectin domain family 2, member D                                                       | 2,78 | 3,97 | 2,20 |
| 205637_s_at | 6457   | SH3GL3    | SH3-domain GRB2-like 3                                                                        | 2,78 | 4,09 | 2,20 |
| 204861_s_at | 4671   | NAIP      | NLR family, apoptosis inhibitory protein                                                      | 2,78 | 2,16 | 2,20 |
| 221154_at   | 57093  | TRIM49    | tripartite motif-containing 49                                                                | 2,78 | 3,85 | 2,20 |
| 216794_at   | --     | --        | --                                                                                            | 2,78 | 2,41 | 2,20 |
| 1558862_at  | 284610 | NBPF5     | neuroblastoma breakpoint family, member 5                                                     | 2,78 | 3,25 | 2,20 |
| 217983_s_at | 8635   | RNASET2   | ribonuclease T2                                                                               | 2,78 | 3,15 | 2,20 |
| 244582_at   | --     | --        | --                                                                                            | 2,77 | 3,17 | 2,20 |
| 218609_s_at | 318    | NUDT2     | nudix (nucleoside diphosphate linked moiety X)-type motif 2                                   | 2,77 | 1,94 | 2,20 |
| 240342_at   | 391712 | TRIM61    | tripartite motif-containing 61                                                                | 2,77 | 2,05 | 2,20 |
| 1569818_at  | --     | --        | --                                                                                            | 2,77 | 5,96 | 2,20 |
| 208111_at   | 554    | AVPR2     | arginine vasopressin receptor 2 (nephrogenic diabetes insipidus)                              | 2,77 | 2,18 | 2,20 |
| 237557_at   | --     | --        | --                                                                                            | 2,77 | 3,15 | 2,20 |
| 1558075_at  | 440353 | LOC440353 | nuclear pore complex interacting protein pseudogene                                           | 2,77 | 6,70 | 2,20 |
| 229638_at   | 79191  | IRX3      | iroquois homeobox 3                                                                           | 2,77 | 4,99 | 2,20 |
| 218704_at   | 54894  | RNF43     | ring finger protein 43                                                                        | 2,77 | 2,01 | 2,20 |
| 243422_at   | 94104  | C21orf66  | chromosome 21 open reading frame 66                                                           | 2,77 | 2,92 | 2,20 |
| 207795_s_at | 3824   | KLRD1     | killer cell lectin-like receptor subfamily D, member 1                                        | 2,77 | 2,17 | 2,20 |
| 204771_s_at | 7270   | TTF1      | transcription termination factor, RNA polymerase I                                            | 2,77 | 2,08 | 2,20 |
| 1564204_at  | --     | --        | --                                                                                            | 2,77 | 5,11 | 2,20 |

|              |                   |                      |                                                                                                                                          |      |       |      |
|--------------|-------------------|----------------------|------------------------------------------------------------------------------------------------------------------------------------------|------|-------|------|
| 213502_x_at  | 91316             | LOC91316             | similar to bK246H3.1 (immunoglobulin lambda-like polypeptide 1, pre-B-cell specific)                                                     | 2,77 | 2,46  | 2,20 |
| 244773_at    | 10396             | ATP8A1               | ATPase, aminophospholipid transporter (APLT), Class I, type 8A, member 1                                                                 | 2,77 | 3,16  | 2,20 |
| 230372_at    | 3037              | HAS2                 | hyaluronan synthase 2                                                                                                                    | 2,76 | 4,49  | 2,20 |
| 1561271_at   | 284047            | FLJ36492             | hypothetical protein FLJ36492                                                                                                            | 2,76 | 4,83  | 2,20 |
| 232547_at    | 80725             | SNIP                 | SNAP25-interacting protein                                                                                                               | 2,76 | 2,55  | 2,20 |
| 243309_at    | 145788            | FLJ27352             | hypothetical LOC145788                                                                                                                   | 2,76 | 2,54  | 2,20 |
| 242619_x_at  | 206358            | SLC36A1              | solute carrier family 36 (proton/amino acid symporter), member 1                                                                         | 2,76 | 2,69  | 2,20 |
| 217480_x_at  | 339562            | LOC339562            | similar to Ig kappa chain V-I region Walker precursor                                                                                    | 2,76 | 8,62  | 2,20 |
| 1565860_at   | 9736              | USP34                | ubiquitin specific peptidase 34                                                                                                          | 2,76 | 6,35  | 2,38 |
| 234593_at    | 8618              | CADPS                | Ca2+-dependent secretion activator                                                                                                       | 2,76 | 3,55  | 2,38 |
| 233721_x_at  | --                | --                   | --                                                                                                                                       | 2,76 | 4,65  | 2,38 |
| 223343_at    | 58475             | MS4A7                | membrane-spanning 4-domains, subfamily A, member 7                                                                                       | 2,76 | 2,14  | 2,38 |
| 242893_at    | --                | --                   | --                                                                                                                                       | 2,76 | 2,24  | 2,38 |
| 204316_at    | 6001              | RGS10                | regulator of G-protein signalling 10                                                                                                     | 2,76 | 3,31  | 2,38 |
| 1561596_at   | 84163             | GTF2IRD2             | GTF2I repeat domain containing 2                                                                                                         | 2,75 | 4,89  | 2,38 |
| 234707_x_at  | --                | --                   | --                                                                                                                                       | 2,75 | 11,74 | 2,38 |
| 229937_x_at  | 10859             | LILRB1               | leukocyte immunoglobulin-like receptor, subfamily B (with TM and ITIM domains), member 1                                                 | 2,75 | 5,26  | 2,38 |
| 224423_x_at  | 5370              | PMCHL2               | pro-melanin-concentrating hormone-like 2                                                                                                 | 2,75 | 3,04  | 2,38 |
| 210580_x_at  | 445329//<br>/6818 | SULT1A4//SU<br>LT1A3 | sulfotransferase family, cytosolic, 1A, phenol-preferring, member 4//sulfotransferase family, cytosolic, 1A, phenol-preferring, member 3 | 2,75 | 1,54  | 2,38 |
| 226695_at    | 5396              | PRRX1                | paired related homeobox 1                                                                                                                | 2,75 | 3,89  | 2,38 |
| 214000_s_at  | 6001              | RGS10                | regulator of G-protein signalling 10                                                                                                     | 2,75 | 3,05  | 2,38 |
| 1555365_x_at | 55553             | SOX6                 | SRY (sex determining region Y)-box 6                                                                                                     | 2,75 | 6,15  | 2,38 |
| 215278_at    | 23530             | NNT                  | nicotinamide nucleotide transhydrogenase                                                                                                 | 2,75 | 5,59  | 2,38 |

|              |                     |                   |                                                                                 |      |       |      |
|--------------|---------------------|-------------------|---------------------------------------------------------------------------------|------|-------|------|
| 205267_at    | 5450                | POU2AF1           | POU class 2 associating factor 1                                                | 2,74 | 5,11  | 2,38 |
| 1552895_a_at | 149992              | C21orf99          | chromosome 21 open reading frame 99                                             | 2,74 | 3,99  | 2,38 |
| 201666_at    | 7076                | TIMP1             | TIMP metalloproteinase inhibitor 1                                              | 2,74 | 1,82  | 2,38 |
| 205569_at    | 27074               | LAMP3             | lysosomal-associated membrane protein 3                                         | 2,74 | 5,78  | 2,38 |
| 1568812_at   | --                  | --                | --                                                                              | 2,74 | 3,34  | 2,38 |
| 230589_at    | --                  | --                | --                                                                              | 2,74 | 2,02  | 2,38 |
| 1562276_at   | --                  | --                | --                                                                              | 2,73 | 4,31  | 2,38 |
| 215709_at    | --                  | --                | --                                                                              | 2,73 | 2,99  | 2,38 |
| 209823_x_at  | 3119                | HLA-DQB1          | major histocompatibility complex, class II, DQ beta 1                           | 2,73 | 3,39  | 2,38 |
| 241922_at    | 8543                | LMO4              | LIM domain only 4                                                               | 2,73 | 2,90  | 2,38 |
| 244485_at    | --                  | --                | --                                                                              | 2,73 | 1,74  | 2,38 |
| 1564067_x_at | 221409//<br>/441151 | SPATS1///C6orf137 | spermatogenesis associated, serine-rich 1///chromosome 6 open reading frame 137 | 2,73 | 2,37  | 2,38 |
| 1560762_at   | 285972              | LOC285972         | hypothetical protein LOC285972                                                  | 2,73 | 3,31  | 2,38 |
| 225686_at    | 348235              | FAM33A            | family with sequence similarity 33, member A                                    | 2,73 | 2,04  | 2,38 |
| 214453_s_at  | 10561               | IFI44             | interferon-induced protein 44                                                   | 2,73 | 3,09  | 2,38 |
| 236199_at    | 240                 | ALOX5             | arachidonate 5-lipoxygenase                                                     | 2,73 | 2,72  | 2,38 |
| 1569476_at   | 26082               | DKFZP434L187      | DKFZP434L187 protein                                                            | 2,73 | 7,68  | 2,38 |
| 227877_at    | 389289              | C5orf39           | chromosome 5 open reading frame 39                                              | 2,73 | 2,38  | 2,38 |
| 229146_at    | 136895              | C7orf31           | chromosome 7 open reading frame 31                                              | 2,73 | 1,85  | 2,38 |
| 1553185_at   | 158158              | RASEF             | RAS and EF-hand domain containing                                               | 2,73 | 2,90  | 2,38 |
| 217193_x_at  | --                  | --                | --                                                                              | 2,73 | 15,17 | 2,38 |
| 233600_at    | 64800               | EFCAB6            | EF-hand calcium binding domain 6                                                | 2,72 | 2,88  | 2,38 |
| 1559492_at   | --                  | --                | --                                                                              | 2,72 | 3,41  | 2,38 |
| 210303_at    | 10586               | MAB21L2           | mab-21-like 2 (C. elegans)                                                      | 2,72 | 4,73  | 2,38 |
| 235238_at    | 399694              | SHC4              | SHC (Src homology 2 domain containing) family, member 4                         | 2,72 | 2,51  | 2,38 |
| 210260_s_at  | 25816               | TNFAIP8           | tumor necrosis factor, alpha-induced protein 8                                  | 2,72 | 2,86  | 2,38 |
| 1568872_at   | --                  | --                | --                                                                              | 2,72 | 2,79  | 2,38 |

|                  |                   |                      |                                                                                            |      |      |      |
|------------------|-------------------|----------------------|--------------------------------------------------------------------------------------------|------|------|------|
| 234561_at        | 114134            | SLC2A13              | solute carrier family 2 (facilitated glucose transporter), member 13                       | 2,72 | 4,74 | 2,38 |
| 216837_at        | 2044              | EPHA5                | EPH receptor A5                                                                            | 2,72 | 3,83 | 2,38 |
| 227243_s_at      | 253738            | EBF3                 | early B-cell factor 3                                                                      | 2,72 | 1,84 | 2,38 |
| 227573_s_at      | 23363             | OBSL1                | obscurin-like 1                                                                            | 2,71 | 1,68 | 2,38 |
| 231231_at        | --                | --                   | --                                                                                         | 2,71 | 3,63 | 2,38 |
| 231565_at        | 255119            | C4orf22              | chromosome 4 open reading frame 22                                                         | 2,71 | 9,64 | 2,38 |
| 227628_at        | 493869            | LOC493869            | similar to RIKEN cDNA 2310016C16                                                           | 2,71 | 2,14 | 2,38 |
| 220252_x_at      | 80231             | CXorf21              | chromosome X open reading frame 21                                                         | 2,71 | 7,57 | 2,38 |
| 221942_s_at      | 2982              | GUCY1A3              | guanylate cyclase 1, soluble, alpha 3                                                      | 2,71 | 2,94 | 2,38 |
| 1562327_at       | --                | --                   | --                                                                                         | 2,71 | 3,98 | 2,38 |
| 1569857_s_at     | 7174              | TPP2                 | tripeptidyl peptidase II                                                                   | 2,71 | 2,08 | 2,38 |
| 204610_s_at      | 11007             | CCDC85B              | coiled-coil domain containing 85B                                                          | 2,71 | 2,20 | 2,38 |
| 240397_x_at      | 81035             | COLEC12              | collectin sub-family member 12                                                             | 2,71 | 3,66 | 2,38 |
| 1566763_at       | --                | --                   | --                                                                                         | 2,71 | 3,05 | 2,38 |
| 206997_s_at      | 388605//<br>/9394 | HS6ST1P///HS<br>6ST1 | heparan sulfate 6-O-sulfotransferase 1 pseudogene///heparan sulfate 6-O-sulfotransferase 1 | 2,71 | 1,83 | 2,38 |
| 1565861_at       | 9736              | USP34                | ubiquitin specific peptidase 34                                                            | 2,71 | 3,15 | 2,38 |
| 233359_at        | --                | --                   | --                                                                                         | 2,70 | 2,32 | 2,38 |
| 241670_x_at      | --                | --                   | --                                                                                         | 2,70 | 2,06 | 2,38 |
| 220905_at        | --                | --                   | --                                                                                         | 2,70 | 2,86 | 2,38 |
| 214451_at        | 7021              | TFAP2B               | transcription factor AP-2 beta (activating enhancer binding protein 2 beta)                | 2,70 | 2,87 | 2,38 |
| 1569796_s_at     | 26033             | ATRNL1               | attractin-like 1                                                                           | 2,70 | 3,49 | 2,38 |
| 230680_at        | --                | --                   | --                                                                                         | 2,70 | 3,11 | 2,38 |
| 210230_at        | --                | --                   | --                                                                                         | 2,70 | 2,15 | 2,38 |
| 238361_s_at      | 51422             | PRKAG2               | protein kinase, AMP-activated, gamma 2 non-catalytic subunit                               | 2,70 | 2,98 | 2,38 |
| 1554331_a_a<br>t | 474354            | LRRC18               | leucine rich repeat containing 18                                                          | 2,70 | 1,92 | 2,38 |
| 242926_at        | 200576            | PIP5K3               | phosphatidylinositol-3-phosphate/phosphatidylinositol 5-kinase, type III                   | 2,70 | 1,77 | 2,38 |

|             |        |           |                                                                          |      |       |      |
|-------------|--------|-----------|--------------------------------------------------------------------------|------|-------|------|
| 1564097_at  | --     | --        | --                                                                       | 2,70 | 2,99  | 2,38 |
| 1566528_at  | 23316  | CUTL2     | cut-like 2 (Drosophila)                                                  | 2,69 | 3,31  | 2,38 |
| 216414_at   | --     | --        | --                                                                       | 2,69 | 2,22  | 2,38 |
| 1557717_at  | 338862 | LOC338862 | hypothetical protein LOC338862                                           | 2,69 | 2,99  | 2,38 |
| 1562974_at  | --     | --        | --                                                                       | 2,69 | 2,70  | 2,38 |
| 1558742_at  | --     | --        | --                                                                       | 2,69 | 1,63  | 2,38 |
| 1570482_at  | 6581   | SLC22A3   | solute carrier family 22 (extraneuronal monoamine transporter), member 3 | 2,69 | 2,95  | 2,38 |
| 211654_x_at | 3119   | HLA-DQB1  | major histocompatibility complex, class II, DQ beta 1                    | 2,69 | 3,89  | 2,38 |
| 234019_at   | --     | --        | --                                                                       | 2,69 | 2,02  | 2,38 |
| 207339_s_at | 4050   | LTB       | lymphotoxin beta (TNF superfamily, member 3)                             | 2,69 | 2,48  | 2,38 |
| 233386_at   | --     | --        | --                                                                       | 2,69 | 2,24  | 2,38 |
| 238850_at   | --     | --        | --                                                                       | 2,69 | 3,42  | 2,38 |
| 224459_at   | 79944  | L2HGDH    | L-2-hydroxyglutarate dehydrogenase                                       | 2,69 | 1,96  | 2,38 |
| 205804_s_at | 80342  | TRAF3IP3  | TRAF3 interacting protein 3                                              | 2,69 | 15,75 | 2,38 |
| 233410_at   | 1545   | CYP1B1    | cytochrome P450, family 1, subfamily B, polypeptide 1                    | 2,69 | 2,00  | 2,38 |
| 236179_at   | 1009   | CDH11     | cadherin 11, type 2, OB-cadherin (osteoblast)                            | 2,69 | 3,00  | 2,38 |
| 204336_s_at | 10287  | RGS19     | regulator of G-protein signalling 19                                     | 2,69 | 2,12  | 2,38 |
| 218646_at   | 54969  | C4orf27   | chromosome 4 open reading frame 27                                       | 2,69 | 1,70  | 2,38 |
| 1569637_at  | 163227 | ZNF100    | zinc finger protein 100                                                  | 2,68 | 1,97  | 2,38 |
| 1562607_at  | --     | --        | --                                                                       | 2,68 | 5,08  | 2,38 |
| 228646_at   | 151242 | PPP1R1C   | protein phosphatase 1, regulatory (inhibitor) subunit 1C                 | 2,68 | 2,66  | 2,38 |
| 206804_at   | 917    | CD3G      | CD3g molecule, gamma (CD3-TCR complex)                                   | 2,68 | 4,47  | 2,38 |
| 233431_x_at | --     | --        | --                                                                       | 2,68 | 2,91  | 2,38 |
| 219014_at   | 51316  | PLAC8     | placenta-specific 8                                                      | 2,68 | 8,85  | 2,38 |
| 216052_x_at | 9048   | ARTN      | artemin                                                                  | 2,68 | 3,08  | 2,38 |
| 206900_x_at | 56242  | ZNF253    | zinc finger protein 253                                                  | 2,68 | 2,03  | 2,38 |
| 220738_s_at | 27330  | RPS6KA6   | ribosomal protein S6 kinase, 90kDa, polypeptide 6                        | 2,68 | 2,08  | 2,38 |

|                  |                   |                      |                                                                                                                                                                                               |      |       |      |
|------------------|-------------------|----------------------|-----------------------------------------------------------------------------------------------------------------------------------------------------------------------------------------------|------|-------|------|
| 227976_at        | 2                 | A2M                  | alpha-2-macroglobulin                                                                                                                                                                         | 2,68 | 2,10  | 2,38 |
| 231578_at        | 2633///4<br>00759 | GBP1///LOC40<br>0759 | guanylate binding protein 1, interferon-inducible, 67kDa///similar to Interferon-induced guanylate-binding protein 1 (GTP-binding protein 1) (Guanine nucleotide-binding protein 1) (HuGBP-1) | 2,68 | 3,70  | 2,38 |
| 236029_at        | --                | --                   | --                                                                                                                                                                                            | 2,68 | 3,51  | 2,38 |
| 242258_at        | 22890             | ZBTB1                | zinc finger and BTB domain containing 1                                                                                                                                                       | 2,68 | 2,51  | 2,38 |
| 205656_at        | 27253             | PCDH17               | protocadherin 17                                                                                                                                                                              | 2,68 | 2,58  | 2,38 |
| 221533_at        | 26355             | C3orf28              | chromosome 3 open reading frame 28                                                                                                                                                            | 2,68 | 1,79  | 2,38 |
| 235447_at        | 142940            | TRUB1                | TruB pseudouridine (psi) synthase homolog 1 (E. coli)                                                                                                                                         | 2,68 | 6,38  | 2,74 |
| 206045_s_at      | 8715              | NOL4                 | nucleolar protein 4                                                                                                                                                                           | 2,68 | 3,30  | 2,74 |
| 222965_at        | 55387             | PRO2214              | hypothetical protein PRO2214                                                                                                                                                                  | 2,67 | 2,85  | 2,74 |
| 238370_x_at      | 4197              | MDS1                 | myelodysplasia syndrome 1                                                                                                                                                                     | 2,67 | 6,16  | 2,74 |
| 1558714_at       | 6091              | ROBO1                | roundabout, axon guidance receptor, homolog 1 (Drosophila)                                                                                                                                    | 2,67 | 4,67  | 2,74 |
| 1553186_x_at     | 158158            | RASEF                | RAS and EF-hand domain containing                                                                                                                                                             | 2,67 | 2,95  | 2,74 |
| 215831_at        | 29007             | PRO1621              | PRO1621 protein                                                                                                                                                                               | 2,67 | 3,15  | 2,74 |
| 241728_at        | --                | --                   | --                                                                                                                                                                                            | 2,67 | 6,14  | 2,74 |
| 1554383_a_a<br>t | 9697              | TRAM2                | translocation associated membrane protein 2                                                                                                                                                   | 2,67 | 1,70  | 2,74 |
| 209700_x_at      | 9659              | PDE4DIP              | phosphodiesterase 4D interacting protein (myomegalin)                                                                                                                                         | 2,67 | 1,87  | 2,74 |
| 216984_x_at      | 3538              | IGLC2                | immunoglobulin lambda constant 2 (Kern-Oz- marker)                                                                                                                                            | 2,67 | 25,07 | 2,74 |
| 1569492_at       | --                | --                   | --                                                                                                                                                                                            | 2,67 | 2,67  | 2,74 |
| 227921_at        | --                | --                   | --                                                                                                                                                                                            | 2,67 | 2,19  | 2,74 |
| 216852_x_at      | 28831             | IGLJ3                | immunoglobulin lambda joining 3                                                                                                                                                               | 2,67 | 8,61  | 2,74 |
| 206666_at        | 3003              | GZMK                 | granzyme K (granzyme 3; tryptase II)                                                                                                                                                          | 2,67 | 7,72  | 2,74 |
| 224965_at        | 54331             | GNG2                 | guanine nucleotide binding protein (G protein), gamma 2                                                                                                                                       | 2,67 | 2,65  | 2,74 |
| 227566_at        | 50863             | HNT                  | neurotrimin                                                                                                                                                                                   | 2,67 | 3,83  | 2,74 |
| 232944_at        | 79875             | THSD4                | thrombospondin, type I, domain containing 4                                                                                                                                                   | 2,67 | 2,86  | 2,74 |
| 222205_x_at      | --                | --                   | --                                                                                                                                                                                            | 2,67 | 2,56  | 2,74 |

|              |        |                   |                                                                                       |      |       |      |
|--------------|--------|-------------------|---------------------------------------------------------------------------------------|------|-------|------|
| 1555174_at   | --     | --                | --                                                                                    | 2,66 | 3,44  | 2,74 |
| 1556768_at   | --     | --                | --                                                                                    | 2,66 | 5,04  | 2,74 |
| 218726_at    | 55355  | DKFZp762E13<br>12 | hypothetical protein DKFZp762E1312                                                    | 2,66 | 9,85  | 2,74 |
| 233442_at    | --     | --                | --                                                                                    | 2,66 | 1,84  | 2,74 |
| 234346_x_at  | --     | --                | --                                                                                    | 2,66 | 3,04  | 2,74 |
| 234341_x_at  | 91548  | LOC91548          | hypothetical protein LOC91548                                                         | 2,66 | 2,02  | 2,74 |
| 237711_at    | --     | --                | --                                                                                    | 2,66 | 7,68  | 2,74 |
| 1555210_at   | 56986  | DTWD1             | DTW domain containing 1                                                               | 2,66 | 3,04  | 2,74 |
| 237422_at    | 64225  | ARL6IP2           | ADP-ribosylation factor-like 6 interacting protein 2                                  | 2,66 | 2,67  | 2,74 |
| 241838_at    | --     | --                | --                                                                                    | 2,66 | 1,66  | 2,74 |
| 219174_at    | 80173  | IFT74             | intraflagellar transport 74 homolog (Chlamydomonas)                                   | 2,65 | 1,57  | 2,74 |
| 235014_at    | 147727 | LOC147727         | hypothetical protein LOC147727                                                        | 2,65 | 2,76  | 2,74 |
| 1566162_x_at | 4212   | MEIS2             | Meis homeobox 2                                                                       | 2,65 | 2,18  | 2,74 |
| 1561962_at   | 3778   | KCNMA1            | potassium large conductance calcium-activated channel, subfamily M,<br>alpha member 1 | 2,65 | 4,67  | 2,74 |
| 210703_at    | --     | --                | --                                                                                    | 2,65 | 3,44  | 2,74 |
| 241310_at    | --     | --                | --                                                                                    | 2,65 | 3,93  | 2,74 |
| 211424_x_at  | 25840  | METTL7A           | methyltransferase like 7A                                                             | 2,65 | 8,73  | 2,74 |
| 226142_at    | 11010  | GLIPR1            | GLI pathogenesis-related 1 (glioma)                                                   | 2,65 | 2,28  | 2,74 |
| 233519_at    | 4905   | NSF               | N-ethylmaleimide-sensitive factor                                                     | 2,65 | 2,43  | 2,74 |
| 217967_s_at  | 116496 | FAM129A           | family with sequence similarity 129, member A                                         | 2,65 | 1,85  | 2,74 |
| 235385_at    | 55016  | MARCH1            | membrane-associated ring finger (C3HC4) 1                                             | 2,65 | 2,42  | 2,74 |
| 1561703_at   | --     | --                | --                                                                                    | 2,65 | 6,61  | 2,74 |
| 211617_at    | 228    | ALDOAP2           | aldolase A, fructose-bisphosphate pseudogene 2                                        | 2,65 | 13,74 | 2,74 |
| 224425_x_at  | 440888 | LOC440888         | ARP3 actin-related protein 3 homolog B pseudogene                                     | 2,65 | 4,42  | 2,74 |

|              |                                                          |                                                                |                                                                                                                                                                                                                              |      |       |      |
|--------------|----------------------------------------------------------|----------------------------------------------------------------|------------------------------------------------------------------------------------------------------------------------------------------------------------------------------------------------------------------------------|------|-------|------|
| 211430_s_at  | 3492///3<br>500///35<br>01///350<br>2///3507             | IGH@///IGHG<br>1///IGHG2///I<br>GHG3///IGHM                    | immunoglobulin heavy locus///immunoglobulin heavy constant gamma 1 (G1m marker)///immunoglobulin heavy constant gamma 2 (G2m marker)///immunoglobulin heavy constant gamma 3 (G3m marker)///immunoglobulin heavy constant mu | 2,65 | 9,89  | 2,74 |
| 234064_at    | 163                                                      | AP2B1                                                          | adaptor-related protein complex 2, beta 1 subunit                                                                                                                                                                            | 2,64 | 2,05  | 2,74 |
| 232390_at    | 4685                                                     | NCAM2                                                          | neural cell adhesion molecule 2                                                                                                                                                                                              | 2,64 | 4,92  | 2,74 |
| 206640_x_at  | 2574///2<br>576///25<br>77///257<br>8///2579<br>///26748 | GAGE2///GAG<br>E4///GAGE5//<br>/GAGE6///GA<br>GE7///GAGE7<br>B | G antigen 2///G antigen 4///G antigen 5///G antigen 6///G antigen 7///G antigen 7B                                                                                                                                           | 2,64 | 7,86  | 2,74 |
| 217157_x_at  | --                                                       | --                                                             | --                                                                                                                                                                                                                           | 2,64 | 14,09 | 2,74 |
| 1558527_at   | --                                                       | --                                                             | --                                                                                                                                                                                                                           | 2,64 | 2,51  | 2,74 |
| 210383_at    | 6323                                                     | SCN1A                                                          | sodium channel, voltage-gated, type I, alpha subunit                                                                                                                                                                         | 2,64 | 2,94  | 2,74 |
| 244246_at    | 145282                                                   | MIPOL1                                                         | mirror-image polydactyly 1                                                                                                                                                                                                   | 2,64 | 1,91  | 2,74 |
| 1555812_a_at | 397                                                      | ARHGDIB                                                        | Rho GDP dissociation inhibitor (GDI) beta                                                                                                                                                                                    | 2,64 | 2,34  | 2,74 |
| 238411_x_at  | 9315                                                     | C5orf13                                                        | chromosome 5 open reading frame 13                                                                                                                                                                                           | 2,64 | 4,73  | 2,74 |
| 1561134_at   | --                                                       | --                                                             | --                                                                                                                                                                                                                           | 2,64 | 2,39  | 2,74 |
| 241636_x_at  | --                                                       | --                                                             | --                                                                                                                                                                                                                           | 2,64 | 3,28  | 2,74 |
| 231969_at    | 56977                                                    | STOX2                                                          | storkhead box 2                                                                                                                                                                                                              | 2,64 | 3,59  | 2,74 |
| 204670_x_at  | 3123                                                     | HLA-DRB1                                                       | major histocompatibility complex, class II, DR beta 1                                                                                                                                                                        | 2,64 | 1,60  | 2,74 |
| 232808_at    | --                                                       | --                                                             | --                                                                                                                                                                                                                           | 2,64 | 5,23  | 2,74 |
| 235593_at    | 9839                                                     | ZEB2                                                           | zinc finger E-box binding homeobox 2                                                                                                                                                                                         | 2,63 | 2,22  | 2,74 |
| 1567878_at   | 245928                                                   | DEFB114                                                        | defensin, beta 114                                                                                                                                                                                                           | 2,63 | 2,32  | 2,74 |
| 217362_x_at  | 3128                                                     | HLA-DRB6                                                       | major histocompatibility complex, class II, DR beta 6 (pseudogene)                                                                                                                                                           | 2,63 | 1,73  | 2,74 |
| 1558115_at   | 8434                                                     | RECK                                                           | reversion-inducing-cysteine-rich protein with kazal motifs                                                                                                                                                                   | 2,63 | 2,29  | 2,74 |



|             |        |          |                                                                        |      |      |      |
|-------------|--------|----------|------------------------------------------------------------------------|------|------|------|
| 232090_at   | --     | --       | --                                                                     | 2,63 | 2,22 | 2,74 |
| 235508_at   | 5371   | PML      | promyelocytic leukemia                                                 | 2,63 | 4,00 | 2,74 |
| 219033_at   | 79668  | PARP8    | poly (ADP-ribose) polymerase family, member 8                          | 2,63 | 2,60 | 2,74 |
| 1569494_at  | 145282 | MIPOL1   | mirror-image polydactyly 1                                             | 2,63 | 3,57 | 2,74 |
| 207529_at   | 1670   | DEFA5    | defensin, alpha 5, Paneth cell-specific                                | 2,63 | 1,97 | 2,74 |
| 223710_at   | 10344  | CCL26    | chemokine (C-C motif) ligand 26                                        | 2,63 | 2,03 | 2,74 |
| 232569_at   | --     | --       | --                                                                     | 2,62 | 2,94 | 2,74 |
| 211597_s_at | 84525  | HOP      | homeodomain-only protein                                               | 2,62 | 4,47 | 2,74 |
| 234086_at   | 10186  | LHFP     | lipoma HMGIC fusion partner                                            | 2,62 | 3,15 | 2,74 |
| 222106_at   | 23627  | PRND     | prion protein 2 (duplet)                                               | 2,62 | 2,97 | 2,74 |
| 216626_at   | 23022  | PALLD    | palladin, cytoskeletal associated protein                              | 2,62 | 6,40 | 2,74 |
| 226878_at   | 3111   | HLA-DOA  | major histocompatibility complex, class II, DO alpha                   | 2,62 | 2,18 | 2,74 |
| 228884_at   | --     | --       | --                                                                     | 2,62 | 2,54 | 2,74 |
| 231385_at   | 359787 | DPPA3    | developmental pluripotency associated 3                                | 2,62 | 2,83 | 2,74 |
| 1564580_at  | 1600   | DAB1     | disabled homolog 1 (Drosophila)                                        | 2,62 | 7,17 | 2,74 |
| 240901_at   | --     | --       | --                                                                     | 2,62 | 2,71 | 2,74 |
| 212843_at   | 4684   | NCAM1    | neural cell adhesion molecule 1                                        | 2,62 | 4,11 | 2,74 |
| 216853_x_at | 28831  | IGLJ3    | immunoglobulin lambda joining 3                                        | 2,62 | 2,70 | 2,74 |
| 243271_at   | 219285 | SAMD9L   | sterile alpha motif domain containing 9-like                           | 2,62 | 2,79 | 2,74 |
| 216702_x_at | 51761  | ATP8A2   | ATPase, aminophospholipid transporter-like, Class I, type 8A, member 2 | 2,61 | 3,59 | 2,74 |
| 1560081_at  | 90408  | LOC90408 | hypothetical protein LOC90408                                          | 2,61 | 2,34 | 2,74 |
| 38241_at    | 10384  | BTN3A3   | butyrophilin, subfamily 3, member A3                                   | 2,61 | 2,40 | 2,74 |
| 244254_at   | --     | --       | --                                                                     | 2,61 | 2,53 | 2,74 |
| 1570422_at  | 54221  | SNTG2    | syntrophin, gamma 2                                                    | 2,61 | 4,74 | 2,74 |
| 1552876_at  | 114042 | C21orf89 | chromosome 21 open reading frame 89                                    | 2,61 | 2,01 | 2,74 |
| 217394_at   | 6955   | TRA@     | T cell receptor alpha locus                                            | 2,61 | 2,20 | 2,74 |
| 206686_at   | 5163   | PDK1     | pyruvate dehydrogenase kinase, isozyme 1                               | 2,61 | 4,34 | 2,74 |
| 1556630_at  | 255082 | CASC2    | cancer susceptibility candidate 2                                      | 2,61 | 2,08 | 2,74 |
| 215043_s_at | 11042  | SMA5     | glucuronidase, beta pseudogene                                         | 2,61 | 3,62 | 2,74 |
| 205483_s_at | 9636   | ISG15    | ISG15 ubiquitin-like modifier                                          | 2,61 | 2,35 | 2,74 |
| 224116_at   | 2917   | GRM7     | glutamate receptor, metabotropic 7                                     | 2,61 | 1,93 | 2,74 |

|              |        |           |                                                           |      |      |      |
|--------------|--------|-----------|-----------------------------------------------------------|------|------|------|
| 238581_at    | 115362 | GBP5      | guanylate binding protein 5                               | 2,61 | 9,47 | 2,74 |
| 1555638_a_at | 64092  | SAMSN1    | SAM domain, SH3 domain and nuclear localization signals 1 | 2,61 | 2,64 | 2,74 |
| 229340_at    | 222698 | C6orf194  | chromosome 6 open reading frame 194                       | 2,61 | 3,94 | 2,74 |
| 244147_at    | 56243  | KIAA1217  | KIAA1217                                                  | 2,61 | 1,60 | 2,74 |
| 209436_at    | 10418  | SPON1     | spondin 1, extracellular matrix protein                   | 2,61 | 3,05 | 2,74 |
| 232998_at    | 201798 | TIGD4     | tigger transposable element derived 4                     | 2,61 | 2,38 | 2,74 |
| 1558034_s_at | 1356   | CP        | ceruloplasmin (ferroxidase)                               | 2,61 | 4,79 | 2,74 |
| 1561018_at   | --     | --        | --                                                        | 2,60 | 4,62 | 2,74 |
| 216051_x_at  | 56243  | KIAA1217  | KIAA1217                                                  | 2,60 | 2,15 | 2,74 |
| 216365_x_at  | 28793  | IGLV3-25  | immunoglobulin lambda variable 3-25                       | 2,60 | 6,80 | 2,74 |
| 239483_at    | 399821 | FLJ37035  | FLJ37035 protein                                          | 2,60 | 1,89 | 2,74 |
| 1569759_at   | 1662   | DDX10     | DEAD (Asp-Glu-Ala-Asp) box polypeptide 10                 | 2,60 | 3,73 | 2,74 |
| 230867_at    | 131873 | LOC131873 | hypothetical protein LOC131873                            | 2,60 | 2,28 | 2,74 |
| 231798_at    | 9241   | NOG       | noggin                                                    | 2,60 | 2,92 | 2,74 |
| 218672_at    | 79005  | SCNM1     | sodium channel modifier 1                                 | 2,60 | 1,77 | 2,74 |
| 209312_x_at  | 3123   | HLA-DRB1  | major histocompatibility complex, class II, DR beta 1     | 2,60 | 1,66 | 2,74 |
| 208885_at    | 3936   | LCP1      | lymphocyte cytosolic protein 1 (L-plastin)                | 2,60 | 4,85 | 2,74 |
| 1564160_at   | --     | --        | --                                                        | 2,60 | 4,29 | 2,74 |
| 234773_x_at  | --     | --        | --                                                        | 2,60 | 2,10 | 2,74 |
| 220504_at    | 11081  | KERA      | keratocan                                                 | 2,60 | 1,75 | 2,74 |
| 1570125_at   | --     | --        | --                                                        | 2,60 | 1,82 | 2,74 |
| 208305_at    | 5241   | PGR       | progesterone receptor                                     | 2,60 | 1,90 | 2,74 |
| 38149_at     | 9938   | ARHGAP25  | Rho GTPase activating protein 25                          | 2,60 | 2,35 | 3,08 |
| 1557890_at   | --     | --        | --                                                        | 2,59 | 2,02 | 3,08 |
| 215962_at    | 54212  | SNTG1     | syntrophin, gamma 1                                       | 2,59 | 5,08 | 3,08 |
| 218542_at    | 55165  | CEP55     | centrosomal protein 55kDa                                 | 2,59 | 5,35 | 3,08 |
| 218999_at    | 55281  | TMEM140   | transmembrane protein 140                                 | 2,59 | 2,50 | 3,08 |
| 235229_at    | --     | --        | --                                                        | 2,59 | 4,16 | 3,08 |
| 211568_at    | 577    | BAI3      | brain-specific angiogenesis inhibitor 3                   | 2,59 | 2,52 | 3,08 |
| 206006_s_at  | 22832  | KIAA1009  | KIAA1009                                                  | 2,59 | 2,18 | 3,08 |
| 243069_at    | 80195  | C10orf57  | chromosome 10 open reading frame 57                       | 2,59 | 2,35 | 3,08 |
| 1555364_at   | --     | --        | --                                                        | 2,59 | 7,16 | 3,08 |

|                  |                     |                            |                                                             |      |      |      |
|------------------|---------------------|----------------------------|-------------------------------------------------------------|------|------|------|
| 1561199_at       | --                  | --                         | --                                                          | 2,59 | 2,79 | 3,08 |
| 1566632_at       | --                  | --                         | --                                                          | 2,59 | 2,42 | 3,08 |
| 226424_at        | 828                 | CAPS                       | calcyphosine                                                | 2,58 | 1,87 | 3,08 |
| 1555144_at       | 51326               | ARL17P1                    | ADP-ribosylation factor-like 17 pseudogene 1                | 2,58 | 2,40 | 3,08 |
| 241287_x_at      | 353497              | POLN                       | polymerase (DNA directed) nu                                | 2,58 | 2,69 | 3,08 |
| 210311_at        | 2250                | FGF5                       | fibroblast growth factor 5                                  | 2,58 | 2,40 | 3,08 |
| 1566848_x_at     | --                  | --                         | --                                                          | 2,58 | 2,57 | 3,08 |
| 221634_at        | 118433              | RPL23AP7                   | ribosomal protein L23a pseudogene 7                         | 2,58 | 1,64 | 3,08 |
| 216442_x_at      | 2335                | FN1                        | fibronectin 1                                               | 2,58 | 3,09 | 3,08 |
| 238407_at        | 829                 | CAPZA1                     | capping protein (actin filament) muscle Z-line, alpha 1     | 2,58 | 9,29 | 3,08 |
| 230961_at        | --                  | --                         | --                                                          | 2,58 | 2,00 | 3,08 |
| 241907_at        | 2719                | GPC3                       | glypican 3                                                  | 2,58 | 4,32 | 3,08 |
| 208511_at        | 26255               | PTTG3                      | pituitary tumor-transforming 3                              | 2,58 | 4,28 | 3,08 |
| 207021_at        | 11055               | ZPBP                       | zona pellucida binding protein                              | 2,58 | 2,24 | 3,08 |
| 1562289_at       | --                  | --                         | --                                                          | 2,58 | 1,69 | 3,08 |
| 1562480_at       | --                  | --                         | --                                                          | 2,58 | 3,43 | 3,08 |
| 221698_s_at      | 64581               | CLEC7A                     | C-type lectin domain family 7, member A                     | 2,57 | 2,25 | 3,08 |
| 226623_at        | 84457               | PHYHIPL                    | phytanoyl-CoA 2-hydroxylase interacting protein-like        | 2,57 | 2,16 | 3,08 |
| 1552807_a_a<br>t | 89790               | SIGLEC10                   | sialic acid binding Ig-like lectin 10                       | 2,57 | 3,11 | 3,08 |
| 206134_at        | 27299               | ADAMDEC1                   | ADAM-like, decysin 1                                        | 2,57 | 6,06 | 3,08 |
| 1553179_at       | 171019              | ADAMTS19                   | ADAM metalloproteinase with thrombospondin type 1 motif, 19 | 2,57 | 4,95 | 3,08 |
| 234020_x_at      | --                  | --                         | --                                                          | 2,57 | 2,31 | 3,08 |
| 234470_at        | 136157//<br>/392982 | hCG_1651160<br>///tcag7.51 | hCG1651160///similar to RIKEN cDNA 1500011L16               | 2,57 | 2,38 | 3,08 |
| 216565_x_at      | 391020              | LOC391020                  | interferon induced transmembrane protein pseudogene         | 2,57 | 1,63 | 3,08 |
| 211374_x_at      | --                  | --                         | --                                                          | 2,57 | 2,17 | 3,08 |
| 1567379_at       | 399818              | LOC399818                  | similar to CG9643-PA                                        | 2,57 | 7,57 | 3,08 |
| 205151_s_at      | --                  | --                         | --                                                          | 2,57 | 3,35 | 3,08 |
| 1561544_at       | --                  | --                         | --                                                          | 2,57 | 3,53 | 3,08 |

|              |        |           |                                                                                        |      |       |      |
|--------------|--------|-----------|----------------------------------------------------------------------------------------|------|-------|------|
| 211794_at    | 2533   | FYB       | FYN binding protein (FYB-120/130)                                                      | 2,57 | 9,42  | 3,08 |
| 227462_at    | 64167  | LRAP      | leukocyte-derived arginine aminopeptidase                                              | 2,57 | 3,61  | 3,08 |
| 241844_x_at  | 80008  | TMEM156   | transmembrane protein 156                                                              | 2,57 | 2,80  | 3,08 |
| 242201_at    | 5380   | PMS2L2    | postmeiotic segregation increased 2-like 2                                             | 2,57 | 2,39  | 3,08 |
| 244420_at    | 862    | RUNX1T1   | runt-related transcription factor 1; translocated to, 1 (cyclin D-related)             | 2,57 | 2,71  | 3,08 |
| 234992_x_at  | 1894   | ECT2      | epithelial cell transforming sequence 2 oncogene                                       | 2,57 | 2,04  | 3,08 |
| 1553394_a_at | 7021   | TFAP2B    | transcription factor AP-2 beta (activating enhancer binding protein 2 beta)            | 2,57 | 2,33  | 3,08 |
| 220431_at    | 28983  | TMPRSS11E | transmembrane protease, serine 11E                                                     | 2,57 | 3,55  | 3,08 |
| 200986_at    | 710    | SERPING1  | serpin peptidase inhibitor, clade G (C1 inhibitor), member 1, (angioedema, hereditary) | 2,56 | 1,74  | 3,08 |
| 211810_s_at  | 2581   | GALC      | galactosylceramidase                                                                   | 2,56 | 4,37  | 3,08 |
| 244664_at    | --     | --        | --                                                                                     | 2,56 | 1,89  | 3,08 |
| 204750_s_at  | 1824   | DSC2      | desmocollin 2                                                                          | 2,56 | 4,61  | 3,08 |
| 230678_at    | --     | --        | --                                                                                     | 2,56 | 3,49  | 3,08 |
| 1566106_at   | --     | --        | --                                                                                     | 2,56 | 2,90  | 3,08 |
| 1563941_at   | --     | --        | --                                                                                     | 2,56 | 2,47  | 3,08 |
| 206681_x_at  | 2813   | GP2       | glycoprotein 2 (zymogen granule membrane)                                              | 2,56 | 1,72  | 3,08 |
| 204475_at    | 4312   | MMP1      | matrix metalloproteinase 1 (interstitial collagenase)                                  | 2,56 | 2,82  | 3,08 |
| 1555643_s_at | 353514 | LILRA5    | leukocyte immunoglobulin-like receptor, subfamily A (with TM domain), member 5         | 2,56 | 1,70  | 3,08 |
| 1553879_a_at | 137362 | GOT1L1    | glutamic-oxaloacetic transaminase 1-like 1                                             | 2,56 | 2,32  | 3,08 |
| 208012_x_at  | 3431   | SP110     | SP110 nuclear body protein                                                             | 2,55 | 2,18  | 3,08 |
| 240271_at    | --     | --        | --                                                                                     | 2,55 | 4,99  | 3,08 |
| 220871_at    | --     | --        | --                                                                                     | 2,55 | 27,47 | 3,08 |
| 211742_s_at  | 2124   | EVI2B     | ecotropic viral integration site 2B                                                    | 2,55 | 4,54  | 3,08 |
| 211366_x_at  | 834    | CASP1     | caspase 1, apoptosis-related cysteine peptidase (interleukin 1, beta, convertase)      | 2,55 | 2,71  | 3,08 |
| 233653_at    | --     | --        | --                                                                                     | 2,55 | 3,17  | 3,08 |
| 1564200_at   | --     | --        | --                                                                                     | 2,55 | 2,18  | 3,08 |

|              |                        |                                 |                                                                                                                 |      |       |      |
|--------------|------------------------|---------------------------------|-----------------------------------------------------------------------------------------------------------------|------|-------|------|
| 220872_at    | 55415                  | PRO2964                         | hypothetical protein PRO2964                                                                                    | 2,55 | 2,56  | 3,08 |
| 1553387_at   | 472                    | ATM                             | ataxia telangiectasia mutated                                                                                   | 2,55 | 2,04  | 3,08 |
| 200950_at    | 10552                  | ARPC1A                          | actin related protein 2/3 complex, subunit 1A, 41kDa                                                            | 2,55 | 1,58  | 3,08 |
| 242945_at    | 54757                  | FAM20A                          | family with sequence similarity 20, member A                                                                    | 2,55 | 2,05  | 3,08 |
| 216828_at    | --                     | --                              | --                                                                                                              | 2,55 | 3,06  | 3,08 |
| 204037_at    | 1902                   | EDG2                            | endothelial differentiation, lysophosphatidic acid G-protein-coupled receptor, 2                                | 2,55 | 2,68  | 3,08 |
| 237836_at    | --                     | --                              | --                                                                                                              | 2,55 | 5,43  | 3,08 |
| 224235_at    | --                     | --                              | --                                                                                                              | 2,55 | 3,20  | 3,08 |
| 1564139_at   | 144571                 | LOC144571                       | hypothetical protein LOC144571                                                                                  | 2,55 | 1,74  | 3,08 |
| 215634_at    | 2890                   | GRIA1                           | glutamate receptor, ionotropic, AMPA 1                                                                          | 2,55 | 2,38  | 3,08 |
| 223977_s_at  | 56651                  | C18orf2                         | chromosome 18 open reading frame 2                                                                              | 2,55 | 4,51  | 3,08 |
| 229142_s_at  | 582                    | BBS1                            | Bardet-Biedl syndrome 1                                                                                         | 2,54 | 2,70  | 3,08 |
| 212671_s_at  | 3117///3118            | HLA-DQA1///HLA-DQA2             | major histocompatibility complex, class II, DQ alpha 1///major histocompatibility complex, class II, DQ alpha 2 | 2,54 | 4,03  | 3,08 |
| 1563052_at   | --                     | --                              | --                                                                                                              | 2,54 | 18,63 | 3,08 |
| 232953_at    | 400723//402483//441123 | LOC400723///tcag7.907///C6orf88 | hypothetical LOC400723///hypothetical LOC402483///chromosome 6 open reading frame 88                            | 2,54 | 4,37  | 3,08 |
| 213299_at    | 51341                  | ZBTB7A                          | zinc finger and BTB domain containing 7A                                                                        | 2,54 | 2,68  | 3,08 |
| 1555118_at   | 956                    | ENTPD3                          | ectonucleoside triphosphate diphosphohydrolase 3                                                                | 2,54 | 2,26  | 3,08 |
| 1561026_a_at | 54901                  | CDKAL1                          | CDK5 regulatory subunit associated protein 1-like 1                                                             | 2,54 | 4,46  | 3,08 |
| 216827_at    | --                     | --                              | --                                                                                                              | 2,54 | 3,03  | 3,08 |
| 227061_at    | --                     | --                              | --                                                                                                              | 2,54 | 2,66  | 3,08 |
| 209806_at    | 85236                  | HIST1H2BK                       | histone cluster 1, H2bk                                                                                         | 2,54 | 2,40  | 3,08 |
| 212613_at    | 11118                  | BTN3A2                          | butyrophilin, subfamily 3, member A2                                                                            | 2,54 | 2,61  | 3,08 |
| 237832_at    | --                     | --                              | --                                                                                                              | 2,54 | 4,27  | 3,08 |
| 203625_x_at  | 6502                   | SKP2                            | S-phase kinase-associated protein 2 (p45)                                                                       | 2,54 | 1,81  | 3,08 |
| 227430_at    | 84872                  | ZC3H10                          | zinc finger CCCH-type containing 10                                                                             | 2,54 | 1,77  | 3,08 |

|              |        |              |                                                              |      |      |      |
|--------------|--------|--------------|--------------------------------------------------------------|------|------|------|
| 226146_at    | --     | --           | --                                                           | 2,54 | 1,59 | 3,08 |
| 1562189_at   | 7373   | COL14A1      | collagen, type XIV, alpha 1 (undulin)                        | 2,54 | 3,10 | 3,08 |
| 1563101_at   | 56938  | ARNTL2       | aryl hydrocarbon receptor nuclear translocator-like 2        | 2,54 | 2,13 | 3,08 |
| 204510_at    | 8317   | CDC7         | cell division cycle 7 homolog (S. cerevisiae)                | 2,54 | 2,35 | 3,08 |
| 234235_at    | --     | --           | --                                                           | 2,53 | 7,26 | 3,08 |
| 215193_x_at  | 3123   | HLA-DRB1     | major histocompatibility complex, class II, DR beta 1        | 2,53 | 1,68 | 3,08 |
| 236787_at    | --     | --           | --                                                           | 2,53 | 5,46 | 3,08 |
| 220725_x_at  | 55567  | DNAH3        | dynein, axonemal, heavy chain 3                              | 2,53 | 1,86 | 3,08 |
| 217194_at    | 9462   | RASAL2       | RAS protein activator like 2                                 | 2,53 | 2,57 | 3,08 |
| 1570629_at   | 466    | ATF1         | activating transcription factor 1                            | 2,53 | 2,94 | 3,08 |
| 230261_at    | 7903   | ST8SIA4      | ST8 alpha-N-acetyl-neuraminide alpha-2,8-sialyltransferase 4 | 2,53 | 2,37 | 3,08 |
| 243973_at    | --     | --           | --                                                           | 2,53 | 1,75 | 3,08 |
| 239076_at    | 441220 | 41518        | septin 13                                                    | 2,53 | 2,14 | 3,08 |
| 215599_at    | 11039  | SMA4         | glucuronidase, beta pseudogene                               | 2,53 | 2,27 | 3,08 |
| 1555485_s_at | 285596 | NY-REN-7     | NY-REN-7 antigen                                             | 2,53 | 2,28 | 3,08 |
| 223433_at    | 57002  | C7orf36      | chromosome 7 open reading frame 36                           | 2,53 | 1,68 | 3,08 |
| 216540_at    | --     | --           | --                                                           | 2,53 | 3,44 | 3,08 |
| 230902_at    | --     | --           | --                                                           | 2,53 | 9,34 | 3,08 |
| 207501_s_at  | 2257   | FGF12        | fibroblast growth factor 12                                  | 2,53 | 1,68 | 3,08 |
| 231938_at    | 151648 | SGOL1        | shugoshin-like 1 (S. pombe)                                  | 2,53 | 3,51 | 3,08 |
| 1559936_at   | 899    | CCNF         | cyclin F                                                     | 2,53 | 3,03 | 3,08 |
| 1560659_at   | 150759 | LOC150759    | hypothetical protein LOC150759                               | 2,53 | 2,42 | 3,08 |
| 1555299_s_at | 30816  | ERVWE1       | endogenous retroviral family W, env(C7), member 1 (syncytin) | 2,53 | 7,90 | 3,08 |
| 203066_at    | 51363  | GALNAC4S-6ST | B cell RAG associated protein                                | 2,53 | 1,93 | 3,08 |
| 242236_at    | --     | --           | --                                                           | 2,52 | 4,31 | 3,08 |
| 236193_at    | 8347   | HIST1H2BC    | histone cluster 1, H2bc                                      | 2,52 | 1,74 | 3,08 |
| 1565544_at   | 50862  | RNF141       | ring finger protein 141                                      | 2,52 | 6,16 | 3,08 |
| 217292_at    | 9108   | MTMR7        | myotubularin related protein 7                               | 2,52 | 2,49 | 3,08 |
| 233424_at    | --     | --           | --                                                           | 2,52 | 3,57 | 3,08 |

|                  |        |           |                                                               |      |       |      |
|------------------|--------|-----------|---------------------------------------------------------------|------|-------|------|
| 1569923_s_at     | 285708 | LOC285708 | hypothetical protein LOC285708                                | 2,52 | 1,88  | 3,08 |
| 204923_at        | 54440  | CXorf9    | chromosome X open reading frame 9                             | 2,52 | 15,81 | 3,08 |
| 1566222_at       | --     | --        | --                                                            | 2,52 | 2,66  | 3,08 |
| 210218_s_at      | 6672   | SP100     | SP100 nuclear antigen                                         | 2,52 | 1,77  | 3,08 |
| 204304_s_at      | 8842   | PROM1     | prominin 1                                                    | 2,52 | 3,46  | 3,08 |
| 1570009_at       | --     | --        | --                                                            | 2,52 | 3,24  | 3,08 |
| 205817_at        | 6495   | SIX1      | SIX homeobox 1                                                | 2,52 | 1,72  | 3,08 |
| 229530_at        | --     | --        | --                                                            | 2,52 | 2,10  | 3,08 |
| 1569661_at       | --     | --        | --                                                            | 2,52 | 2,38  | 3,08 |
| 1561879_at       | --     | --        | --                                                            | 2,52 | 2,27  | 3,08 |
| 217281_x_at      | --     | --        | --                                                            | 2,52 | 2,94  | 3,08 |
| 223700_at        | 84057  | MND1      | meiotic nuclear divisions 1 homolog ( <i>S. cerevisiae</i> )  | 2,52 | 2,55  | 3,08 |
| 220609_at        | 202181 | LOC202181 | hypothetical protein LOC202181                                | 2,52 | 4,52  | 3,08 |
| 208037_s_at      | 8174   | MADCAM1   | mucosal vascular addressin cell adhesion molecule 1           | 2,51 | 3,39  | 3,08 |
| 227791_at        | 285195 | SLC9A9    | solute carrier family 9 (sodium/hydrogen exchanger), member 9 | 2,51 | 1,83  | 3,31 |
| 1562925_at       | --     | --        | --                                                            | 2,51 | 3,95  | 3,31 |
| 1555202_a_a<br>t | 55197  | P15RS     | hypothetical protein FLJ10656                                 | 2,51 | 1,83  | 3,31 |
| 211145_x_at      | 3452   | IFNA21    | interferon, alpha 21                                          | 2,51 | 1,77  | 3,31 |
| 216069_at        | 3275   | PRMT2     | protein arginine methyltransferase 2                          | 2,51 | 3,15  | 3,31 |
| 216992_s_at      | 2918   | GRM8      | glutamate receptor, metabotropic 8                            | 2,51 | 2,90  | 3,31 |
| 217573_at        | 2905   | GRIN2C    | glutamate receptor, ionotropic, N-methyl D-aspartate 2C       | 2,51 | 3,62  | 3,31 |
| 217767_at        | 718    | C3        | complement component 3                                        | 2,51 | 9,15  | 3,31 |
| 1564107_at       | --     | --        | --                                                            | 2,51 | 3,85  | 3,31 |
| 1564777_at       | 26062  | HYALP1    | hyaluronoglucosaminidase pseudogene 1                         | 2,51 | 2,38  | 3,31 |
| 242862_x_at      | --     | --        | --                                                            | 2,51 | 2,61  | 3,31 |
| 1562553_at       | --     | --        | --                                                            | 2,51 | 8,09  | 3,31 |
| 1560621_at       | --     | --        | --                                                            | 2,51 | 27,26 | 3,31 |
| 214589_at        | 2257   | FGF12     | fibroblast growth factor 12                                   | 2,51 | 3,30  | 3,31 |

|                  |        |           |                                                                        |      |       |      |
|------------------|--------|-----------|------------------------------------------------------------------------|------|-------|------|
| 206060_s_at      | 26191  | PTPN22    | protein tyrosine phosphatase, non-receptor type 22 (lymphoid)          | 2,51 | 2,28  | 3,31 |
| 233440_at        | --     | --        | --                                                                     | 2,51 | 2,53  | 3,31 |
| 209840_s_at      | 54674  | LRRN3     | leucine rich repeat neuronal 3                                         | 2,51 | 3,37  | 3,31 |
| 204971_at        | 1475   | CSTA      | cystatin A (stefin A)                                                  | 2,51 | 5,37  | 3,31 |
| 207712_at        | 574    | BAGE      | B melanoma antigen                                                     | 2,51 | 6,45  | 3,31 |
| 205686_s_at      | 942    | CD86      | CD86 molecule                                                          | 2,51 | 3,06  | 3,31 |
| 232464_at        | 117852 | TRIMP1    | tripartite motif-containing pseudogene 1                               | 2,51 | 3,47  | 3,31 |
| 230036_at        | 219285 | SAMD9L    | sterile alpha motif domain containing 9-like                           | 2,50 | 2,39  | 3,31 |
| 1556805_at       | --     | --        | --                                                                     | 2,50 | 2,62  | 3,31 |
| 233290_at        | --     | --        | --                                                                     | 2,50 | 2,20  | 3,31 |
| 215594_at        | --     | --        | --                                                                     | 2,50 | 2,13  | 3,31 |
| 207598_x_at      | 7516   | XRCC2     | X-ray repair complementing defective repair in Chinese hamster cells 2 | 2,50 | 2,52  | 3,31 |
| 228186_s_at      | 84870  | RSPO3     | R-spondin 3 homolog (Xenopus laevis)                                   | 2,50 | 2,23  | 3,31 |
| 1560662_s_at     | 440253 | WHDC1L2   | WAS protein homology region 2 domain containing 1-like 2               | 2,50 | 3,15  | 3,31 |
| 236900_x_at      | 126661 | LOC126661 | hypothetical protein LOC126661                                         | 2,50 | 3,19  | 3,31 |
| 227179_at        | 27067  | STAU2     | staufen, RNA binding protein, homolog 2 (Drosophila)                   | 2,50 | 2,44  | 3,31 |
| 235733_at        | --     | --        | --                                                                     | 2,50 | 2,08  | 3,31 |
| 1555725_a_a<br>t | 8490   | RG55      | regulator of G-protein signalling 5                                    | 2,50 | 2,70  | 3,31 |
| 1554560_at       | 5239   | PGM5      | phosphoglucomutase 5                                                   | 2,50 | 3,39  | 3,31 |
| 236163_at        | 167410 | LIX1      | Lix1 homolog (mouse)                                                   | 2,50 | 2,44  | 3,31 |
| 235104_at        | 64167  | LRAP      | leukocyte-derived arginine aminopeptidase                              | 2,50 | 3,96  | 3,31 |
| 233373_at        | 2262   | GPC5      | glypican 5                                                             | 2,50 | 2,50  | 3,31 |
| 237169_at        | 3371   | TNC       | tenascin C (hexabrachion)                                              | 2,50 | 29,90 | 3,31 |
| 1563533_at       | 339896 | GADL1     | glutamate decarboxylase-like 1                                         | 2,50 | 9,96  | 3,31 |
| 1570098_at       | --     | --        | --                                                                     | 2,50 | 4,47  | 3,31 |
| 242881_x_at      | --     | --        | --                                                                     | 2,50 | 5,97  | 3,31 |
| 1569999_at       | --     | --        | --                                                                     | 2,50 | 2,45  | 3,31 |
| 215071_s_at      | 8334   | HIST1H2AC | histone cluster 1, H2ac                                                | 2,50 | 1,51  | 3,31 |
| 232538_at        | --     | --        | --                                                                     | 2,50 | 2,06  | 3,31 |



|              |        |           |                                                             |      |      |      |
|--------------|--------|-----------|-------------------------------------------------------------|------|------|------|
| 237478_at    | 399900 | LOC399900 | hypothetical gene supported by AK093779                     | 2,50 | 5,54 | 3,31 |
| 234833_at    | --     | --        | --                                                          | 2,50 | 2,82 | 3,31 |
| 228766_at    | 948    | CD36      | CD36 molecule (thrombospondin receptor)                     | 2,50 | 4,88 | 3,31 |
| 1562364_at   | --     | --        | --                                                          | 2,50 | 3,21 | 3,31 |
| 221087_s_at  | 80833  | APOL3     | apolipoprotein L, 3                                         | 2,50 | 2,48 | 3,31 |
| 215281_x_at  | 23126  | POGZ      | pogo transposable element with ZNF domain                   | 2,49 | 3,00 | 3,31 |
| 232712_at    | --     | --        | --                                                          | 2,49 | 7,77 | 3,31 |
| 216466_at    | 89795  | NAV3      | neuron navigator 3                                          | 2,49 | 3,50 | 3,31 |
| 209841_s_at  | 54674  | LRRN3     | leucine rich repeat neuronal 3                              | 2,49 | 1,77 | 3,31 |
| 215837_x_at  | 29007  | PRO1621   | PRO1621 protein                                             | 2,49 | 4,52 | 3,31 |
| 238409_x_at  | 55074  | OXR1      | oxidation resistance 1                                      | 2,49 | 2,76 | 3,31 |
| 214723_x_at  | 57730  | KIAA1641  | KIAA1641                                                    | 2,49 | 2,23 | 3,31 |
| 233246_at    | 286205 | C9orf126  | chromosome 9 open reading frame 126                         | 2,49 | 2,86 | 3,31 |
| 1555368_x_at | 90827  | ZNF479    | zinc finger protein 479                                     | 2,49 | 2,56 | 3,31 |
| 231678_s_at  | 127    | ADH4      | alcohol dehydrogenase 4 (class II), pi polypeptide          | 2,49 | 2,01 | 3,31 |
| 205399_at    | 9201   | DCLK1     | doublecortin-like kinase 1                                  | 2,49 | 1,93 | 3,31 |
| 1564112_at   | 149647 | FAM71A    | family with sequence similarity 71, member A                | 2,49 | 1,87 | 3,31 |
| 203678_at    | 22909  | MTMR15    | myotubularin related protein 15                             | 2,49 | 1,45 | 3,31 |
| 1553781_at   | 92092  | ZC3HAV1L  | zinc finger CCCH-type, antiviral 1-like                     | 2,49 | 1,93 | 3,31 |
| 230555_s_at  | 90390  | THRAP6    | thyroid hormone receptor associated protein 6               | 2,48 | 2,17 | 3,31 |
| 1563854_s_at | 283045 | LOC283045 | hypothetical protein LOC283045                              | 2,48 | 4,03 | 3,31 |
| 1559307_s_at | 5933   | RBL1      | retinoblastoma-like 1 (p107)                                | 2,48 | 5,71 | 3,31 |
| 241537_at    | --     | --        | --                                                          | 2,48 | 5,11 | 3,31 |
| 206730_at    | 2892   | GRIA3     | glutamate receptor, ionotropic, AMPA 3                      | 2,48 | 2,52 | 3,31 |
| 1569927_at   | 4436   | MSH2      | mutS homolog 2, colon cancer, nonpolyposis type 1 (E. coli) | 2,48 | 3,01 | 3,31 |
| 233779_x_at  | 6788   | STK3      | serine/threonine kinase 3 (STE20 homolog, yeast)            | 2,48 | 2,60 | 3,31 |
| 233437_at    | 2557   | GABRA4    | gamma-aminobutyric acid (GABA) A receptor, alpha 4          | 2,48 | 2,47 | 3,31 |
| 236459_at    | --     | --        | --                                                          | 2,48 | 2,42 | 3,31 |

|              |                                 |                                           |                                                                                                                                      |      |      |      |
|--------------|---------------------------------|-------------------------------------------|--------------------------------------------------------------------------------------------------------------------------------------|------|------|------|
| 240075_at    | --                              | --                                        | --                                                                                                                                   | 2,48 | 2,91 | 3,31 |
| 244821_at    | --                              | --                                        | --                                                                                                                                   | 2,48 | 2,30 | 3,31 |
| 1569983_at   | --                              | --                                        | --                                                                                                                                   | 2,48 | 2,54 | 3,31 |
| 217004_s_at  | 4168                            | MCF2                                      | MCF.2 cell line derived transforming sequence                                                                                        | 2,48 | 2,41 | 3,31 |
| 244021_at    | 9728                            | KIAA0256                                  | KIAA0256 gene product                                                                                                                | 2,48 | 2,04 | 3,31 |
| 214247_s_at  | 27122                           | DKK3                                      | dickkopf homolog 3 ( <i>Xenopus laevis</i> )                                                                                         | 2,48 | 2,14 | 3,31 |
| 231687_at    | 127254                          | C1orf173                                  | chromosome 1 open reading frame 173                                                                                                  | 2,47 | 2,05 | 3,31 |
| 222328_x_at  | 55384                           | MEG3                                      | maternally expressed 3                                                                                                               | 2,47 | 2,05 | 3,31 |
| 239313_at    | 401320                          | LOC401320                                 | hypothetical LOC401320                                                                                                               | 2,47 | 2,34 | 3,31 |
| 1567303_at   | 8556                            | CDC14A                                    | CDC14 cell division cycle 14 homolog A ( <i>S. cerevisiae</i> )                                                                      | 2,47 | 2,98 | 3,31 |
| 233152_x_at  | 8658                            | TNKS                                      | tankyrase, TRF1-interacting ankyrin-related ADP-ribose polymerase                                                                    | 2,47 | 2,50 | 3,31 |
| 233261_at    | 1879                            | EBF1                                      | early B-cell factor 1                                                                                                                | 2,47 | 3,64 | 3,31 |
| 233606_at    | --                              | --                                        | --                                                                                                                                   | 2,47 | 5,52 | 3,31 |
| 1557301_a_at | --                              | --                                        | --                                                                                                                                   | 2,47 | 2,10 | 3,31 |
| 1557374_at   | 10060                           | ABCC9                                     | ATP-binding cassette, sub-family C (CFTR/MRP), member 9                                                                              | 2,47 | 2,71 | 3,31 |
| 1557025_a_at | --                              | --                                        | --                                                                                                                                   | 2,47 | 2,34 | 3,31 |
| 1561713_at   | --                              | --                                        | --                                                                                                                                   | 2,47 | 1,73 | 3,31 |
| 239114_at    | 26297                           | SERGEF                                    | secretion regulating guanine nucleotide exchange factor                                                                              | 2,47 | 1,74 | 3,31 |
| 1552432_at   | 162387                          | FLJ35773                                  | hypothetical protein FLJ35773                                                                                                        | 2,47 | 3,01 | 3,31 |
| 1570255_s_at | 441425//<br>/441430/<br>//84210 | ANKRD20A3//<br>/ANKRD20A2/<br>//ANKRD20A1 | ankyrin repeat domain 20 family, member A3///ankyrin repeat domain 20 family, member A2///ankyrin repeat domain 20 family, member A1 | 2,46 | 9,22 | 3,31 |
| 201116_s_at  | 1363                            | CPE                                       | carboxypeptidase E                                                                                                                   | 2,46 | 2,70 | 3,31 |
| 230536_at    | 80714                           | PBX4                                      | pre-B-cell leukemia homeobox 4                                                                                                       | 2,46 | 2,33 | 3,31 |
| 233066_at    | 254225                          | RNF169                                    | ring finger protein 169                                                                                                              | 2,46 | 2,58 | 3,31 |
| 230653_at    | --                              | --                                        | --                                                                                                                                   | 2,46 | 1,88 | 3,31 |
| 228116_at    | --                              | --                                        | --                                                                                                                                   | 2,46 | 2,68 | 3,31 |

|              |        |           |                                                                                          |      |      |      |
|--------------|--------|-----------|------------------------------------------------------------------------------------------|------|------|------|
| 1566469_at   | --     | --        | --                                                                                       | 2,46 | 2,01 | 3,31 |
| 1555609_a_at | 64393  | ZMAT3     | zinc finger, matrin type 3                                                               | 2,46 | 2,05 | 3,31 |
| 231013_at    | --     | --        | --                                                                                       | 2,46 | 2,31 | 3,31 |
| 1556796_at   | --     | --        | --                                                                                       | 2,46 | 3,70 | 3,31 |
| 226378_s_at  | 148223 | C19orf25  | chromosome 19 open reading frame 25                                                      | 2,46 | 1,85 | 3,31 |
| 219213_at    | 58494  | JAM2      | junctional adhesion molecule 2                                                           | 2,46 | 2,18 | 3,31 |
| 242524_at    | 140689 | CBLN4     | cerebellin 4 precursor                                                                   | 2,46 | 5,20 | 3,31 |
| 226546_at    | --     | --        | --                                                                                       | 2,46 | 2,13 | 3,31 |
| 1560257_at   | --     | --        | --                                                                                       | 2,46 | 2,17 | 3,31 |
| 1569554_at   | --     | --        | --                                                                                       | 2,46 | 2,38 | 3,31 |
| 243499_at    | --     | --        | --                                                                                       | 2,46 | 3,29 | 3,31 |
| 217613_at    | 55314  | TMEM144   | transmembrane protein 144                                                                | 2,46 | 4,24 | 3,31 |
| 1554809_at   | 389199 | LOC389199 | hypothetical gene supported by BC031673                                                  | 2,46 | 2,14 | 3,31 |
| 207420_at    | 10584  | COLEC10   | collectin sub-family member 10 (C-type lectin)                                           | 2,46 | 2,23 | 3,31 |
| 215940_at    | --     | --        | --                                                                                       | 2,46 | 2,62 | 3,31 |
| 238184_at    | --     | --        | --                                                                                       | 2,45 | 3,45 | 3,31 |
| 1560775_at   | --     | --        | --                                                                                       | 2,45 | 9,20 | 3,31 |
| 1569596_at   | 2530   | FUT8      | fucosyltransferase 8 (alpha (1,6) fucosyltransferase)                                    | 2,45 | 4,24 | 3,31 |
| 231434_at    | --     | --        | --                                                                                       | 2,45 | 2,09 | 3,31 |
| 1560745_at   | --     | --        | --                                                                                       | 2,45 | 2,09 | 3,31 |
| 1553129_at   | 79987  | SVEP1     | sushi, von Willebrand factor type A, EGF and pentraxin domain containing 1               | 2,45 | 2,43 | 3,31 |
| 207166_at    | 2792   | GNGT1     | guanine nucleotide binding protein (G protein), gamma transducing activity polypeptide 1 | 2,45 | 2,11 | 3,31 |
| 234087_at    | --     | --        | --                                                                                       | 2,45 | 2,26 | 3,31 |
| 238958_at    | 7324   | UBE2E1    | ubiquitin-conjugating enzyme E2E 1 (UBC4/5 homolog, yeast)                               | 2,45 | 2,08 | 3,31 |
| 243537_at    | 9815   | GIT2      | G protein-coupled receptor kinase interactor 2                                           | 2,45 | 2,26 | 3,31 |
| 1566771_at   | 29970  | SCHIP1    | schwannomin interacting protein 1                                                        | 2,45 | 1,98 | 3,31 |

|             |        |          |                                                               |      |      |      |
|-------------|--------|----------|---------------------------------------------------------------|------|------|------|
| 235885_at   | 64805  | P2RY12   | purinergic receptor P2Y, G-protein coupled, 12                | 2,45 | 3,60 | 3,31 |
| 210952_at   | 11154  | AP4S1    | adaptor-related protein complex 4, sigma 1 subunit            | 2,45 | 2,21 | 3,31 |
| 242919_at   | --     | --       | --                                                            | 2,45 | 1,76 | 3,31 |
| 243864_at   | 151887 | CCDC80   | coiled-coil domain containing 80                              | 2,45 | 2,73 | 3,31 |
| 241737_x_at | 6261   | RYR1     | ryanodine receptor 1 (skeletal)                               | 2,45 | 3,88 | 3,31 |
| 1569539_at  | 11259  | FILIP1L  | filamin A interacting protein 1-like                          | 2,45 | 6,83 | 3,31 |
| 243763_x_at | 9711   | KIAA0226 | KIAA0226                                                      | 2,45 | 2,29 | 3,31 |
| 222970_at   | --     | --       | --                                                            | 2,45 | 3,46 | 3,31 |
| 216244_at   | 3557   | IL1RN    | interleukin 1 receptor antagonist                             | 2,45 | 2,64 | 3,31 |
| 212594_at   | 27250  | PDCD4    | programmed cell death 4 (neoplastic transformation inhibitor) | 2,45 | 1,55 | 3,31 |
| 204963_at   | 8082   | SSPN     | sarcospan (Kras oncogene-associated gene)                     | 2,45 | 1,71 | 3,31 |
| 244762_at   | 10311  | DSCR3    | Down syndrome critical region gene 3                          | 2,45 | 5,06 | 3,31 |
| 237874_at   | 57484  | RNF150   | ring finger protein 150                                       | 2,44 | 2,50 | 3,31 |
| 1562071_at  | 63982  | TMEM16C  | transmembrane protein 16C                                     | 2,44 | 4,55 | 3,31 |
| 215615_x_at | --     | --       | --                                                            | 2,44 | 2,19 | 3,31 |
| 242432_at   | 641522 | ARL17    | ADP-ribosylation factor-like 17                               | 2,44 | 2,11 | 3,31 |
| 243568_at   | 23499  | MACF1    | microtubule-actin crosslinking factor 1                       | 2,44 | 2,56 | 3,31 |
| 226936_at   | 387103 | C6orf173 | chromosome 6 open reading frame 173                           | 2,44 | 2,15 | 3,31 |
| 232368_at   | 221300 | BET3L    | BET3 like ( <i>S. cerevisiae</i> )                            | 2,44 | 3,24 | 3,31 |
| 237104_at   | 1520   | CTSS     | cathepsin S                                                   | 2,44 | 2,33 | 3,31 |
| 1562962_at  | --     | --       | --                                                            | 2,44 | 4,59 | 3,31 |
| 219690_at   | 79713  | TMEM149  | transmembrane protein 149                                     | 2,44 | 2,48 | 3,31 |
| 1561069_at  | --     | --       | --                                                            | 2,44 | 3,69 | 3,31 |
| 235956_at   | 57562  | KIAA1377 | KIAA1377                                                      | 2,44 | 2,28 | 3,31 |
| 204222_s_at | 11010  | GLIPR1   | GLI pathogenesis-related 1 (glioma)                           | 2,44 | 2,70 | 3,31 |
| 1562826_at  | --     | --       | --                                                            | 2,44 | 4,54 | 3,31 |
| 222161_at   | 10003  | NAALAD2  | N-acetylated alpha-linked acidic dipeptidase 2                | 2,44 | 1,91 | 3,31 |
| 210495_x_at | 2335   | FN1      | fibronectin 1                                                 | 2,44 | 2,89 | 3,31 |
| 238876_at   | --     | --       | --                                                            | 2,44 | 7,05 | 3,31 |
| 223562_at   | 64098  | PARVG    | parvin, gamma                                                 | 2,44 | 3,64 | 3,31 |

|              |        |          |                                                               |      |       |      |
|--------------|--------|----------|---------------------------------------------------------------|------|-------|------|
| 240534_at    | --     | --       | --                                                            | 2,44 | 2,84  | 3,31 |
| 223451_s_at  | 51192  | CKLF     | chemokine-like factor                                         | 2,44 | 1,79  | 3,31 |
| 1558640_a_at | 349035 | MGC22265 | hypothetical protein MGC22265                                 | 2,44 | 3,12  | 3,31 |
| 1562997_a_at | --     | --       | --                                                            | 2,44 | 2,21  | 3,31 |
| 211349_at    | 6564   | SLC15A1  | solute carrier family 15 (oligopeptide transporter), member 1 | 2,44 | 2,05  | 3,31 |
| 205758_at    | 925    | CD8A     | CD8a molecule                                                 | 2,43 | 4,01  | 3,31 |
| 1555307_at   | 8458   | TTF2     | transcription termination factor, RNA polymerase II           | 2,43 | 5,42  | 3,31 |
| 226906_s_at  | 64333  | ARHGAP9  | Rho GTPase activating protein 9                               | 2,43 | 2,80  | 3,81 |
| 211719_x_at  | 2335   | FN1      | fibronectin 1                                                 | 2,43 | 3,01  | 3,81 |
| 1558654_at   | 57460  | PPM1H    | protein phosphatase 1H (PP2C domain containing)               | 2,43 | 2,63  | 3,81 |
| 1569013_s_at | 96610  | LOC96610 | hypothetical gene LOC96610                                    | 2,43 | 2,86  | 3,81 |
| 234906_at    | --     | --       | --                                                            | 2,43 | 5,46  | 3,81 |
| 1552708_a_at | 142679 | DUSP19   | dual specificity phosphatase 19                               | 2,43 | 1,87  | 3,81 |
| 206991_s_at  | 1234   | CCR5     | chemokine (C-C motif) receptor 5                              | 2,43 | 16,17 | 3,81 |
| 237530_at    | --     | --       | --                                                            | 2,43 | 2,43  | 3,81 |
| 215522_at    | 22986  | SORCS3   | sortilin-related VPS10 domain containing receptor 3           | 2,43 | 5,73  | 3,81 |
| 1565111_x_at | 266553 | OFCC1    | orofacial cleft 1 candidate 1                                 | 2,43 | 1,75  | 3,81 |
| 1556690_s_at | --     | --       | --                                                            | 2,43 | 3,31  | 3,81 |
| 212464_s_at  | 2335   | FN1      | fibronectin 1                                                 | 2,43 | 2,93  | 3,81 |
| 1558754_at   | 284390 | ZNF763   | zinc finger protein 763                                       | 2,43 | 2,03  | 3,81 |
| 234794_at    | 6461   | SHB      | Src homology 2 domain containing adaptor protein B            | 2,43 | 2,66  | 3,81 |
| 1569231_x_at | 4715   | NDUFB9   | NADH dehydrogenase (ubiquinone) 1 beta subcomplex, 9, 22kDa   | 2,43 | 3,57  | 3,81 |
| 1553618_at   | 129868 | TRIM43   | tripartite motif-containing 43                                | 2,43 | 4,83  | 3,81 |
| 202965_s_at  | 827    | CAPN6    | calpain 6                                                     | 2,43 | 4,92  | 3,81 |
| 216740_at    | 55809  | TRERF1   | transcriptional regulating factor 1                           | 2,43 | 2,49  | 3,81 |
| 234247_at    | --     | --       | --                                                            | 2,43 | 3,20  | 3,81 |

|                  |        |          |                                                            |      |       |      |
|------------------|--------|----------|------------------------------------------------------------|------|-------|------|
| 232363_at        | 11168  | PSIP1    | PC4 and SFRS1 interacting protein 1                        | 2,43 | 2,35  | 3,81 |
| 1570196_at       | 157680 | VPS13B   | vacuolar protein sorting 13 homolog B (yeast)              | 2,42 | 2,30  | 3,81 |
| 243177_at        | 112609 | C6orf117 | chromosome 6 open reading frame 117                        | 2,42 | 2,80  | 3,81 |
| 239311_at        | 90957  | DHX57    | DEAH (Asp-Glu-Ala-Asp/His) box polypeptide 57              | 2,42 | 2,55  | 3,81 |
| 1560798_at       | 40     | ACCN1    | amiloride-sensitive cation channel 1, neuronal (degenerin) | 2,42 | 1,82  | 3,81 |
| 227654_at        | --     | --       | --                                                         | 2,42 | 2,07  | 3,81 |
| 1559988_at       | 158399 | ZNF483   | zinc finger protein 483                                    | 2,42 | 1,97  | 3,81 |
| 217050_at        | 10824  | EPAG     | early lymphoid activation protein                          | 2,42 | 4,69  | 3,81 |
| 243253_at        | 5983   | RFC3     | replication factor C (activator 1) 3, 38kDa                | 2,42 | 2,37  | 3,81 |
| 229815_at        | --     | --       | --                                                         | 2,42 | 8,90  | 3,81 |
| 214607_at        | 5063   | PAK3     | p21 (CDKN1A)-activated kinase 3                            | 2,42 | 2,84  | 3,81 |
| 1561856_at       | --     | --       | --                                                         | 2,42 | 21,03 | 3,81 |
| 1557129_a_a<br>t | 374393 | FAM111B  | family with sequence similarity 111, member B              | 2,42 | 3,18  | 3,81 |
| 1552584_at       | 3594   | IL12RB1  | interleukin 12 receptor, beta 1                            | 2,42 | 2,48  | 3,81 |
| 208296_x_at      | 25816  | TNFAIP8  | tumor necrosis factor, alpha-induced protein 8             | 2,42 | 2,12  | 3,81 |
| 204439_at        | 10964  | IFI44L   | interferon-induced protein 44-like                         | 2,42 | 6,16  | 3,81 |
| 1294_at          | 7318   | UBE1L    | ubiquitin-activating enzyme E1-like                        | 2,42 | 1,93  | 3,81 |
| 1562588_at       | --     | --       | --                                                         | 2,42 | 4,38  | 3,81 |
| 1553843_at       | 256815 | C10orf67 | chromosome 10 open reading frame 67                        | 2,42 | 10,69 | 3,81 |
| 1568702_a_a<br>t | 80227  | WDR71    | WD repeat domain 71                                        | 2,42 | 1,99  | 3,81 |
| 1557476_at       | 375189 | PFN4     | profilin family, member 4                                  | 2,41 | 1,86  | 3,81 |
| 240541_at        | --     | --       | --                                                         | 2,41 | 4,83  | 3,81 |
| 1559901_s_at     | 388815 | C21orf34 | chromosome 21 open reading frame 34                        | 2,41 | 1,91  | 3,81 |
| 243049_at        | --     | --       | --                                                         | 2,41 | 2,14  | 3,81 |
| 233623_at        | 27332  | ZNF638   | zinc finger protein 638                                    | 2,41 | 2,60  | 3,81 |
| 205389_s_at      | 286    | ANK1     | ankyrin 1, erythrocytic                                    | 2,41 | 2,35  | 3,81 |
| 1553581_s_at     | 285672 | P18SRP   | P18SRP protein                                             | 2,41 | 1,64  | 3,81 |
| 228071_at        | 168537 | GIMAP7   | GTPase, IMAP family member 7                               | 2,41 | 1,72  | 3,81 |
| 221969_at        | 5079   | PAX5     | paired box 5                                               | 2,41 | 4,83  | 3,81 |

|              |        |           |                                                                                                 |      |       |      |
|--------------|--------|-----------|-------------------------------------------------------------------------------------------------|------|-------|------|
| 1560854_s_at | 51427  | ZNF107    | zinc finger protein 107                                                                         | 2,41 | 2,38  | 3,81 |
| 1569843_at   | 1780   | DYNC1I1   | dynein, cytoplasmic 1, intermediate chain 1                                                     | 2,41 | 3,50  | 3,81 |
| 217378_x_at  | --     | --        | --                                                                                              | 2,41 | 21,74 | 3,81 |
| 1562209_at   | 285429 | WDR21B    | WD repeat domain 21B                                                                            | 2,41 | 1,87  | 3,81 |
| 241674_s_at  | --     | --        | --                                                                                              | 2,40 | 4,39  | 3,81 |
| 202112_at    | 7450   | VWF       | von Willebrand factor                                                                           | 2,40 | 2,69  | 3,81 |
| 244632_at    | --     | --        | --                                                                                              | 2,40 | 6,57  | 3,81 |
| 221364_at    | 2895   | GRID2     | glutamate receptor, ionotropic, delta 2                                                         | 2,40 | 4,15  | 3,81 |
| 229210_at    | 79621  | RNASEH2B  | ribonuclease H2, subunit B                                                                      | 2,40 | 1,80  | 3,81 |
| 1556147_at   | --     | --        | --                                                                                              | 2,40 | 2,91  | 3,81 |
| 213857_s_at  | 961    | CD47      | CD47 molecule                                                                                   | 2,40 | 1,54  | 3,81 |
| 206488_s_at  | 948    | CD36      | CD36 molecule (thrombospondin receptor)                                                         | 2,40 | 2,66  | 3,81 |
| 216229_x_at  | 80867  | HCG2P7    | HLA complex group 2 pseudogene 7                                                                | 2,40 | 2,62  | 3,81 |
| 222756_s_at  | 408    | ARRB1     | arrestin, beta 1                                                                                | 2,40 | 1,92  | 3,81 |
| 240935_at    | 6928   | TCF2      | transcription factor 2, hepatic; LF-B3; variant hepatic nuclear factor                          | 2,39 | 2,80  | 3,81 |
| 220601_at    | 80262  | C16orf70  | chromosome 16 open reading frame 70                                                             | 2,39 | 2,37  | 3,81 |
| 240518_at    | 55297  | CCDC91    | coiled-coil domain containing 91                                                                | 2,39 | 6,51  | 3,81 |
| 232975_at    | 7726   | TRIM26    | tripartite motif-containing 26                                                                  | 2,39 | 2,40  | 3,81 |
| 241122_s_at  | 4593   | MUSK      | muscle, skeletal, receptor tyrosine kinase                                                      | 2,39 | 4,64  | 3,81 |
| 233330_s_at  | --     | --        | --                                                                                              | 2,39 | 3,72  | 3,81 |
| 240602_at    | 10767  | HBS1L     | HBS1-like ( <i>S. cerevisiae</i> )                                                              | 2,39 | 4,90  | 3,81 |
| 235064_s_at  | 149840 | C20orf196 | chromosome 20 open reading frame 196                                                            | 2,39 | 1,57  | 3,81 |
| 211795_s_at  | 2533   | FYB       | FYN binding protein (FYB-120/130)                                                               | 2,39 | 4,25  | 3,81 |
| 1557994_at   | 7273   | TTN       | titin                                                                                           | 2,39 | 2,51  | 3,81 |
| 1557192_at   | 400574 | C1orf136  | chromosome 1 open reading frame 136                                                             | 2,39 | 1,66  | 3,81 |
| 1561732_at   | --     | --        | --                                                                                              | 2,39 | 5,13  | 3,81 |
| 242546_at    | 84312  | BRMS1L    | breast cancer metastasis-suppressor 1-like                                                      | 2,39 | 4,76  | 3,81 |
| 215184_at    | 23604  | DAPK2     | death-associated protein kinase 2                                                               | 2,38 | 2,41  | 3,81 |
| 241726_at    | 3141   | HLCS      | holocarboxylase synthetase (biotin-(propionyl-Coenzyme A-carboxylase (ATP-hydrolysing)) ligase) | 2,38 | 3,00  | 3,81 |
| 1558489_at   | 10171  | RCL1      | RNA terminal phosphate cyclase-like 1                                                           | 2,38 | 3,46  | 3,81 |
| 236924_at    | --     | --        | --                                                                                              | 2,38 | 2,40  | 3,81 |

|              |        |           |                                                                                                        |      |       |      |
|--------------|--------|-----------|--------------------------------------------------------------------------------------------------------|------|-------|------|
| 220988_s_at  | 114899 | C1QTNF3   | C1q and tumor necrosis factor related protein 3                                                        | 2,38 | 3,06  | 3,81 |
| 1563611_at   | --     | --        | --                                                                                                     | 2,38 | 2,04  | 3,81 |
| 234243_at    | 80135  | BXDC5     | brix domain containing 5                                                                               | 2,38 | 3,59  | 3,81 |
| 233716_at    | --     | --        | --                                                                                                     | 2,38 | 4,48  | 3,81 |
| 207539_s_at  | 3565   | IL4       | interleukin 4                                                                                          | 2,38 | 2,15  | 3,81 |
| 229041_s_at  | 3689   | ITGB2     | integrin, beta 2 (complement component 3 receptor 3 and 4 subunit)                                     | 2,38 | 3,46  | 3,81 |
| 215539_at    | --     | --        | --                                                                                                     | 2,38 | 3,19  | 3,81 |
| 211491_at    | 148    | ADRA1A    | adrenergic, alpha-1A-, receptor                                                                        | 2,38 | 2,06  | 3,81 |
| 1562879_at   | --     | --        | --                                                                                                     | 2,38 | 2,68  | 3,81 |
| 1563209_a_at | 140733 | C20orf133 | chromosome 20 open reading frame 133                                                                   | 2,38 | 2,51  | 3,81 |
| 219104_at    | 50862  | RNF141    | ring finger protein 141                                                                                | 2,38 | 3,04  | 3,81 |
| 203820_s_at  | 10643  | IGF2BP3   | insulin-like growth factor 2 mRNA binding protein 3                                                    | 2,38 | 2,49  | 3,81 |
| 204787_at    | 11326  | VSIG4     | V-set and immunoglobulin domain containing 4                                                           | 2,38 | 3,70  | 3,81 |
| 202283_at    | 5176   | SERPINF1  | serpin peptidase inhibitor, clade F (alpha-2 antiplasmin, pigment epithelium derived factor), member 1 | 2,38 | 2,84  | 3,81 |
| 207554_x_at  | 6915   | TBXA2R    | thromboxane A2 receptor                                                                                | 2,38 | 1,67  | 3,81 |
| 220551_at    | 57084  | SLC17A6   | solute carrier family 17 (sodium-dependent inorganic phosphate cotransporter), member 6                | 2,38 | 2,41  | 3,81 |
| 217235_x_at  | 3538   | IGLC2     | immunoglobulin lambda constant 2 (Kern-Oz- marker)                                                     | 2,38 | 17,78 | 3,81 |
| 201792_at    | 165    | AEBP1     | AE binding protein 1                                                                                   | 2,38 | 2,18  | 3,81 |
| 238865_at    | 132430 | LOC132430 | similar to poly(A) binding protein, cytoplasmic 4 (inducible form)                                     | 2,38 | 2,63  | 3,81 |
| 227811_at    | 89846  | FGD3      | FYVE, RhoGEF and PH domain containing 3                                                                | 2,38 | 2,09  | 3,81 |
| 234861_at    | 93463  | LOC93463  | hypothetical protein LOC93463                                                                          | 2,38 | 2,63  | 3,81 |
| 235368_at    | 11096  | ADAMTS5   | ADAM metallopeptidase with thrombospondin type 1 motif, 5 (aggrecanase-2)                              | 2,38 | 2,12  | 3,81 |



|              |        |           |                                                                                    |      |      |      |
|--------------|--------|-----------|------------------------------------------------------------------------------------|------|------|------|
| 242602_x_at  | 9534   | ZNF254    | zinc finger protein 254                                                            | 2,37 | 1,68 | 3,81 |
| 241675_s_at  | --     | --        | --                                                                                 | 2,37 | 3,99 | 3,81 |
| 1557080_s_at | 9358   | ITGBL1    | integrin, beta-like 1 (with EGF-like repeat domains)                               | 2,37 | 2,39 | 3,81 |
| 216463_at    | --     | --        | --                                                                                 | 2,37 | 2,68 | 3,81 |
| 234207_at    | --     | --        | --                                                                                 | 2,37 | 7,75 | 3,81 |
| 227512_at    | 92312  | MEX3A     | mex-3 homolog A (C. elegans)                                                       | 2,37 | 4,36 | 3,81 |
| 1553652_a_at | 162681 | C18orf54  | chromosome 18 open reading frame 54                                                | 2,37 | 4,09 | 3,81 |
| 1559724_at   | --     | --        | --                                                                                 | 2,37 | 1,94 | 3,81 |
| 229104_s_at  | 116372 | LYPD1     | LY6/PLAUR domain containing 1                                                      | 2,37 | 1,44 | 3,81 |
| 204446_s_at  | 240    | ALOX5     | arachidonate 5-lipoxygenase                                                        | 2,37 | 1,80 | 3,81 |
| 202086_at    | 4599   | MX1       | myxovirus (influenza virus) resistance 1, interferon-inducible protein p78 (mouse) | 2,37 | 2,34 | 3,81 |
| 217189_s_at  | 9887   | SMG7      | Smg-7 homolog, nonsense mediated mRNA decay factor (C. elegans)                    | 2,37 | 3,06 | 3,81 |
| 205571_at    | 51601  | LIPT1     | lipoyltransferase 1                                                                | 2,37 | 1,55 | 3,81 |
| 240232_at    | 51300  | C3orf1    | chromosome 3 open reading frame 1                                                  | 2,37 | 1,65 | 3,81 |
| 231979_at    | --     | --        | --                                                                                 | 2,37 | 3,63 | 3,81 |
| 241536_at    | --     | --        | --                                                                                 | 2,37 | 6,31 | 3,81 |
| 216613_at    | --     | --        | --                                                                                 | 2,37 | 1,67 | 3,81 |
| 239970_at    | --     | --        | --                                                                                 | 2,37 | 2,94 | 3,81 |
| 226455_at    | 148327 | CREB3L4   | cAMP responsive element binding protein 3-like 4                                   | 2,37 | 1,70 | 3,81 |
| 231482_at    | 347689 | SOX2OT    | SOX2 overlapping transcript (non-coding RNA)                                       | 2,37 | 3,37 | 3,81 |
| 244282_at    | --     | --        | --                                                                                 | 2,36 | 2,10 | 3,81 |
| 230353_at    | 284112 | LOC284112 | hypothetical protein LOC284112                                                     | 2,36 | 1,76 | 3,81 |
| 1569230_at   | 4715   | NDUFB9    | NADH dehydrogenase (ubiquinone) 1 beta subcomplex, 9, 22kDa                        | 2,36 | 4,21 | 3,81 |
| 228152_s_at  | 91351  | FLJ31033  | hypothetical protein FLJ31033                                                      | 2,36 | 3,10 | 3,81 |
| 1553392_at   | 146779 | EFCAB3    | EF-hand calcium binding domain 3                                                   | 2,36 | 2,48 | 3,81 |
| 208493_at    | 3207   | HOXA11    | homeobox A11                                                                       | 2,36 | 3,03 | 3,81 |
| 222336_at    | 201895 | C4orf34   | chromosome 4 open reading frame 34                                                 | 2,36 | 2,78 | 3,81 |

|                  |                                                                |                                                                     |                                                                                                                                                                                                                                                |      |      |      |
|------------------|----------------------------------------------------------------|---------------------------------------------------------------------|------------------------------------------------------------------------------------------------------------------------------------------------------------------------------------------------------------------------------------------------|------|------|------|
| 214993_at        | 253982                                                         | ASPHD1                                                              | aspartate beta-hydroxylase domain containing 1                                                                                                                                                                                                 | 2,36 | 2,92 | 3,81 |
| 1561411_at       | --                                                             | --                                                                  | --                                                                                                                                                                                                                                             | 2,36 | 5,08 | 4,42 |
| 216748_at        | 149628                                                         | PYHIN1                                                              | pyrin and HIN domain family, member 1                                                                                                                                                                                                          | 2,36 | 5,88 | 4,42 |
| 240997_at        | 131873                                                         | LOC131873                                                           | hypothetical protein LOC131873                                                                                                                                                                                                                 | 2,36 | 2,58 | 4,42 |
| 206011_at        | 834                                                            | CASP1                                                               | caspase 1, apoptosis-related cysteine peptidase (interleukin 1, beta, convertase)                                                                                                                                                              | 2,36 | 2,08 | 4,42 |
| 220837_at        | --                                                             | --                                                                  | --                                                                                                                                                                                                                                             | 2,36 | 2,55 | 4,42 |
| 1555349_a_a<br>t | 3689                                                           | ITGB2                                                               | integrin, beta 2 (complement component 3 receptor 3 and 4 subunit)                                                                                                                                                                             | 2,36 | 7,00 | 4,42 |
| 241961_at        | 253017                                                         | SRD5A2L2                                                            | steroid 5 alpha-reductase 2-like 2                                                                                                                                                                                                             | 2,36 | 4,51 | 4,42 |
| 224240_s_at      | 56477                                                          | CCL28                                                               | chemokine (C-C motif) ligand 28                                                                                                                                                                                                                | 2,36 | 2,01 | 4,42 |
| 1564007_at       | --                                                             | --                                                                  | --                                                                                                                                                                                                                                             | 2,36 | 2,98 | 4,42 |
| 221172_at        | 80099                                                          | FLJ21075                                                            | hypothetical protein FLJ21075                                                                                                                                                                                                                  | 2,36 | 5,10 | 4,42 |
| 209866_s_at      | 23284                                                          | LPHN3                                                               | latrophilin 3                                                                                                                                                                                                                                  | 2,36 | 1,85 | 4,42 |
| 230805_at        | --                                                             | --                                                                  | --                                                                                                                                                                                                                                             | 2,36 | 3,96 | 4,42 |
| 204785_x_at      | 3455                                                           | IFNAR2                                                              | interferon (alpha, beta and omega) receptor 2                                                                                                                                                                                                  | 2,36 | 1,98 | 4,42 |
| 224254_x_at      | --                                                             | --                                                                  | --                                                                                                                                                                                                                                             | 2,36 | 2,29 | 4,42 |
| 1558176_at       | 28793///<br>28815///<br>28831///<br>3535///3<br>537///35<br>38 | IGLV3-<br>25///IGLV2-<br>14///IGLJ3///I<br>GL@///IGLC1/<br>///IGLC2 | immunoglobulin lambda variable 3-25///immunoglobulin lambda variable 2-14///immunoglobulin lambda joining 3///immunoglobulin lambda locus///immunoglobulin lambda constant 1 (Mcg marker)///immunoglobulin lambda constant 2 (Kern-Oz- marker) | 2,36 | 1,91 | 4,42 |
| 1559105_at       | 152084                                                         | LOC152084                                                           | hypothetical protein LOC152084                                                                                                                                                                                                                 | 2,36 | 1,92 | 4,42 |
| 231849_at        | 144501                                                         | KRT80                                                               | keratin 80                                                                                                                                                                                                                                     | 2,36 | 6,10 | 4,42 |
| 1561079_at       | 23243                                                          | ANKRD28                                                             | ankyrin repeat domain 28                                                                                                                                                                                                                       | 2,36 | 2,42 | 4,42 |
| 208997_s_at      | 7351                                                           | UCP2                                                                | uncoupling protein 2 (mitochondrial, proton carrier)                                                                                                                                                                                           | 2,36 | 2,32 | 4,42 |
| 229978_at        | 440338                                                         | LOC440338                                                           | hypothetical gene supported by AJ002784                                                                                                                                                                                                        | 2,36 | 1,93 | 4,42 |
| 1564469_at       | 56203                                                          | LMOD3                                                               | leiomodrin 3 (fetal)                                                                                                                                                                                                                           | 2,36 | 2,90 | 4,42 |
| 241008_at        | --                                                             | --                                                                  | --                                                                                                                                                                                                                                             | 2,35 | 1,66 | 4,42 |
| 233658_at        | 10464                                                          | C13orf24                                                            | chromosome 13 open reading frame 24                                                                                                                                                                                                            | 2,35 | 3,63 | 4,42 |

|             |                    |                               |                                                                                                     |      |      |      |
|-------------|--------------------|-------------------------------|-----------------------------------------------------------------------------------------------------|------|------|------|
| 224175_s_at | 445372//<br>/53840 | TRIM6-<br>TRIM34///TRI<br>M34 | tripartite motif-containing 6 and tripartite motif-containing 34///tripartite motif-containing 34   | 2,35 | 3,54 | 4,42 |
| 1561272_at  | --                 | --                            | --                                                                                                  | 2,35 | 2,16 | 4,42 |
| 214594_x_at | 5205               | ATP8B1                        | ATPase, Class I, type 8B, member 1                                                                  | 2,35 | 2,18 | 4,42 |
| 237312_at   | --                 | --                            | --                                                                                                  | 2,35 | 3,85 | 4,42 |
| 241718_x_at | --                 | --                            | --                                                                                                  | 2,35 | 1,96 | 4,42 |
| 206685_at   | 54435              | HCG4                          | HLA complex group 4                                                                                 | 2,35 | 1,81 | 4,42 |
| 206797_at   | 10                 | NAT2                          | N-acetyltransferase 2 (arylamine N-acetyltransferase)                                               | 2,35 | 1,43 | 4,42 |
| 242532_at   | --                 | --                            | --                                                                                                  | 2,35 | 4,08 | 4,42 |
| 203030_s_at | 5799               | PTPRN2                        | protein tyrosine phosphatase, receptor type, N polypeptide 2                                        | 2,35 | 1,70 | 4,42 |
| 244352_at   | --                 | --                            | --                                                                                                  | 2,35 | 1,81 | 4,42 |
| 231037_at   | --                 | --                            | --                                                                                                  | 2,35 | 4,50 | 4,42 |
| 213790_at   | 8038               | ADAM12                        | ADAM metalloproteinase domain 12 (meltrin alpha)                                                    | 2,35 | 2,32 | 4,42 |
| 1570651_at  | 883                | CCBL1                         | cysteine conjugate-beta lyase; cytoplasmic (glutamine transaminase K, kyneurenine aminotransferase) | 2,35 | 2,83 | 4,42 |
| 207028_at   | 10408              | MYCNOS                        | v-myc myelocytomatosis viral related oncogene, neuroblastoma derived (avian) opposite strand        | 2,35 | 2,84 | 4,42 |
| 1554816_at  | 23245              | ASTN2                         | astrotactin 2                                                                                       | 2,35 | 3,33 | 4,42 |
| 1555603_at  | 574                | BAGE                          | B melanoma antigen                                                                                  | 2,35 | 7,58 | 4,42 |
| 205821_at   | 22914              | KLRK1                         | killer cell lectin-like receptor subfamily K, member 1                                              | 2,35 | 9,65 | 4,42 |
| 209955_s_at | 2191               | FAP                           | fibroblast activation protein, alpha                                                                | 2,34 | 2,48 | 4,42 |
| 215008_at   | 7093               | TLL2                          | tolloid-like 2                                                                                      | 2,34 | 2,39 | 4,42 |
| 231776_at   | 8320               | EOMES                         | eomesodermin homolog ( <i>Xenopus laevis</i> )                                                      | 2,34 | 5,22 | 4,42 |
| 237684_at   | --                 | --                            | --                                                                                                  | 2,34 | 3,97 | 4,42 |
| 1562820_at  | --                 | --                            | --                                                                                                  | 2,34 | 2,94 | 4,42 |
| 235990_at   | 5883               | RAD9A                         | RAD9 homolog A ( <i>S. pombe</i> )                                                                  | 2,34 | 1,68 | 4,42 |
| 233043_at   | 221814             | LOC221814                     | hypothetical protein LOC221814                                                                      | 2,34 | 3,37 | 4,42 |
| 203083_at   | 7058               | THBS2                         | thrombospondin 2                                                                                    | 2,34 | 2,22 | 4,42 |

|              |                   |                    |                                                                                   |      |       |      |
|--------------|-------------------|--------------------|-----------------------------------------------------------------------------------|------|-------|------|
| 1557555_at   | --                | --                 | --                                                                                | 2,34 | 1,93  | 4,42 |
| 1570233_at   | --                | --                 | --                                                                                | 2,34 | 2,97  | 4,42 |
| 205270_s_at  | 3937              | LCP2               | lymphocyte cytosolic protein 2 (SH2 domain containing leukocyte protein of 76kDa) | 2,34 | 3,10  | 4,42 |
| 1561526_at   | --                | --                 | --                                                                                | 2,34 | 3,88  | 4,42 |
| 1558449_at   | --                | --                 | --                                                                                | 2,34 | 5,63  | 4,42 |
| 215847_at    | 283755            | LOC283755          | hypothetical protein LOC283755                                                    | 2,34 | 2,77  | 4,42 |
| 204069_at    | 4211              | MEIS1              | Meis homeobox 1                                                                   | 2,33 | 2,16  | 4,42 |
| 222843_at    | 63979             | FIGNL1             | fidgetin-like 1                                                                   | 2,33 | 1,88  | 4,42 |
| 205689_at    | 80003             | PCNXL2             | pecanex-like 2 (Drosophila)                                                       | 2,33 | 2,44  | 4,42 |
| 1559142_at   | 7994              | MYST3              | MYST histone acetyltransferase (monocytic leukemia) 3                             | 2,33 | 2,00  | 4,42 |
| 1553354_a_at | --                | --                 | --                                                                                | 2,33 | 3,09  | 4,42 |
| 1570268_at   | --                | --                 | --                                                                                | 2,33 | 9,42  | 4,42 |
| 227753_at    | 135932            | TMEM139            | transmembrane protein 139                                                         | 2,33 | 2,34  | 4,42 |
| 1561437_at   | 84539             | MCHR2              | melanin-concentrating hormone receptor 2                                          | 2,33 | 3,25  | 4,42 |
| 1558705_at   | 84913             | ATOH8              | atonal homolog 8 (Drosophila)                                                     | 2,33 | 2,23  | 4,42 |
| 209970_x_at  | 834               | CASP1              | caspase 1, apoptosis-related cysteine peptidase (interleukin 1, beta, convertase) | 2,33 | 3,00  | 4,42 |
| 203131_at    | 5156              | PDGFRA             | platelet-derived growth factor receptor, alpha polypeptide                        | 2,33 | 1,79  | 4,42 |
| 236065_at    | --                | --                 | --                                                                                | 2,33 | 1,84  | 4,42 |
| 1566266_at   | --                | --                 | --                                                                                | 2,33 | 2,60  | 4,42 |
| 208496_x_at  | 8355              | HIST1H3G           | histone cluster 1, H3g                                                            | 2,33 | 1,95  | 4,42 |
| 1556595_at   | 51741             | WWOX               | WW domain containing oxidoreductase                                               | 2,33 | 1,90  | 4,42 |
| 215443_at    | 7253              | TSHR               | thyroid stimulating hormone receptor                                              | 2,33 | 2,99  | 4,42 |
| 1559840_s_at | 9096              | TBX18              | T-box 18                                                                          | 2,33 | 1,70  | 4,42 |
| 213193_x_at  | 28568///<br>28639 | TRBV19///TRB<br>C1 | T cell receptor beta variable 19///T cell receptor beta constant 1                | 2,33 | 14,53 | 4,42 |
| 1563279_at   | --                | --                 | --                                                                                | 2,33 | 3,22  | 4,42 |
| 202709_at    | 2331              | FMOD               | fibromodulin                                                                      | 2,33 | 2,00  | 4,42 |
| 232696_at    | 123775            | C16orf46           | chromosome 16 open reading frame 46                                               | 2,32 | 2,99  | 4,42 |
| 242822_at    | --                | --                 | --                                                                                | 2,32 | 2,03  | 4,42 |

|              |        |           |                                                                                                       |      |      |      |
|--------------|--------|-----------|-------------------------------------------------------------------------------------------------------|------|------|------|
| 208146_s_at  | 54504  | CPVL      | carboxypeptidase, vitellogenic-like                                                                   | 2,32 | 1,78 | 4,42 |
| 234571_at    | 127406 | LOC127406 | similar to laminin receptor 1 (ribosomal protein SA)                                                  | 2,32 | 2,09 | 4,42 |
| 216214_at    | --     | --        | --                                                                                                    | 2,32 | 5,06 | 4,42 |
| 1554240_a_at | 3683   | ITGAL     | integrin, alpha L (antigen CD11A (p180), lymphocyte function-associated antigen 1; alpha polypeptide) | 2,32 | 3,01 | 4,42 |
| 219344_at    | 55315  | SLC29A3   | solute carrier family 29 (nucleoside transporters), member 3                                          | 2,32 | 3,38 | 4,42 |
| 232617_at    | 1520   | CTSS      | cathepsin S                                                                                           | 2,32 | 3,41 | 4,42 |
| 1562137_at   | 102    | ADAM10    | ADAM metallopeptidase domain 10                                                                       | 2,32 | 2,03 | 4,42 |
| 1557584_at   | 403323 | FLJ20444  | hypothetical protein FLJ20444                                                                         | 2,32 | 7,17 | 4,42 |
| 1569979_at   | 284459 | HKR1      | GLI-Kruppel family member HKR1                                                                        | 2,32 | 2,99 | 4,42 |
| 218824_at    | 55228  | FLJ10781  | hypothetical protein FLJ10781                                                                         | 2,31 | 1,78 | 4,42 |
| 234723_x_at  | --     | --        | --                                                                                                    | 2,31 | 2,40 | 4,42 |
| 1559244_at   | 56776  | FMN2      | formin 2                                                                                              | 2,31 | 2,26 | 4,42 |
| 1569262_x_at | 90025  | C6orf157  | chromosome 6 open reading frame 157                                                                   | 2,31 | 2,33 | 4,42 |
| 1555078_at   | 283933 | MGC46336  | hypothetical protein MGC46336                                                                         | 2,31 | 2,21 | 4,42 |
| 216788_at    | --     | --        | --                                                                                                    | 2,31 | 3,00 | 4,42 |
| 240187_at    | 5507   | PPP1R3C   | protein phosphatase 1, regulatory (inhibitor) subunit 3C                                              | 2,31 | 2,31 | 4,42 |
| 224284_x_at  | --     | --        | --                                                                                                    | 2,31 | 1,80 | 4,42 |
| 1561463_at   | --     | --        | --                                                                                                    | 2,31 | 2,75 | 4,42 |
| 208576_s_at  | 8358   | HIST1H3B  | histone cluster 1, H3b                                                                                | 2,31 | 2,96 | 4,42 |
| 1559078_at   | 53335  | BCL11A    | B-cell CLL/lymphoma 11A (zinc finger protein)                                                         | 2,31 | 3,15 | 4,42 |
| 1560426_at   | 144535 | C12orf55  | chromosome 12 open reading frame 55                                                                   | 2,31 | 2,46 | 4,42 |
| 1561690_at   | --     | --        | --                                                                                                    | 2,31 | 1,85 | 4,42 |
| 220884_at    | --     | --        | --                                                                                                    | 2,31 | 2,55 | 4,42 |
| 217757_at    | 2      | A2M       | alpha-2-macroglobulin                                                                                 | 2,31 | 1,71 | 4,42 |
| 221756_at    | 113791 | PIK3IP1   | phosphoinositide-3-kinase interacting protein 1                                                       | 2,31 | 1,96 | 4,42 |
| 239580_at    | --     | --        | --                                                                                                    | 2,30 | 2,48 | 4,42 |
| 216206_x_at  | 5609   | MAP2K7    | mitogen-activated protein kinase kinase 7                                                             | 2,30 | 1,73 | 4,42 |

|              |        |                  |                                                         |      |      |      |
|--------------|--------|------------------|---------------------------------------------------------|------|------|------|
| 232306_at    | 60437  | CDH26            | cadherin-like 26                                        | 2,30 | 2,84 | 4,42 |
| 238368_at    | 5820   | PVT1             | Pvt1 oncogene homolog, MYC activator (mouse)            | 2,30 | 2,46 | 4,42 |
| 1556240_at   | --     | --               | --                                                      | 2,30 | 1,84 | 4,42 |
| 1563026_at   | 6760   | SS18             | synovial sarcoma translocation, chromosome 18           | 2,30 | 3,00 | 4,42 |
| 242966_x_at  | 81616  | ACSBG2           | acyl-CoA synthetase bubblegum family member 2           | 2,30 | 1,93 | 4,42 |
| 1558869_at   | 9472   | AKAP6            | A kinase (PRKA) anchor protein 6                        | 2,30 | 3,06 | 4,42 |
| 205150_s_at  | --     | --               | --                                                      | 2,30 | 2,84 | 4,42 |
| 242718_at    | --     | --               | --                                                      | 2,30 | 1,94 | 4,42 |
| 1561161_at   | 22955  | SCMH1            | sex comb on midleg homolog 1 (Drosophila)               | 2,30 | 1,76 | 4,42 |
| 206819_at    | 29774  | DKFZP434P21<br>1 | POM121-like protein                                     | 2,30 | 1,87 | 4,42 |
| 222253_s_at  | 29774  | DKFZP434P21<br>1 | POM121-like protein                                     | 2,30 | 3,41 | 4,42 |
| 1555198_x_at | 54058  | C21orf58         | chromosome 21 open reading frame 58                     | 2,30 | 1,61 | 4,42 |
| 206667_s_at  | 9522   | SCAMP1           | secretory carrier membrane protein 1                    | 2,30 | 1,96 | 4,42 |
| 1559436_x_at | 409    | ARRB2            | arrestin, beta 2                                        | 2,30 | 2,12 | 4,42 |
| 205774_at    | 2161   | F12              | coagulation factor XII (Hageman factor)                 | 2,30 | 1,70 | 4,42 |
| 213071_at    | 1805   | DPT              | dermatopontin                                           | 2,30 | 9,41 | 4,42 |
| 240364_at    | --     | --               | --                                                      | 2,30 | 1,85 | 4,42 |
| 206439_at    | 1833   | EPYC             | epiphycan                                               | 2,30 | 2,47 | 4,42 |
| 226891_at    | 152002 | C3orf21          | chromosome 3 open reading frame 21                      | 2,30 | 1,86 | 4,42 |
| 229490_s_at  | 128239 | IQGAP3           | IQ motif containing GTPase activating protein 3         | 2,30 | 1,91 | 4,42 |
| 225241_at    | 151887 | CCDC80           | coiled-coil domain containing 80                        | 2,30 | 3,09 | 4,42 |
| 1555366_at   | 23362  | PSD3             | pleckstrin and Sec7 domain containing 3                 | 2,30 | 2,24 | 4,42 |
| 234524_at    | 63977  | PRDM15           | PR domain containing 15                                 | 2,30 | 2,67 | 4,42 |
| 1563022_at   | 347475 | LOC347475        | hypothetical gene supported by BC017958                 | 2,30 | 2,80 | 4,42 |
| 234083_at    | --     | --               | --                                                      | 2,29 | 3,76 | 4,42 |
| 203281_s_at  | 7318   | UBE1L            | ubiquitin-activating enzyme E1-like                     | 2,29 | 1,90 | 4,42 |
| 221872_at    | 5918   | RARRES1          | retinoic acid receptor responder (tazarotene induced) 1 | 2,29 | 4,29 | 4,42 |
| 224288_x_at  | --     | --               | --                                                      | 2,29 | 1,96 | 4,42 |

|                  |                                              |                                                         |                                                                                                                                                     |      |       |      |
|------------------|----------------------------------------------|---------------------------------------------------------|-----------------------------------------------------------------------------------------------------------------------------------------------------|------|-------|------|
| 214984_at        | 23049///<br>283846//<br>/440345/<br>//595101 | SMG1///DKFZ<br>p547E087///L<br>OC440345///L<br>OC595101 | PI-3-kinase-related kinase SMG-1///hypothetical gene<br>LOC283846///hypothetical protein LOC440345///PI-3-kinase-related<br>kinase SMG-1 pseudogene | 2,29 | 2,81  | 4,42 |
| 215014_at        | --                                           | --                                                      | --                                                                                                                                                  | 2,29 | 3,12  | 4,42 |
| 1565880_at       | 115584                                       | SLC5A11                                                 | solute carrier family 5 (sodium/glucose cotransporter), member 11                                                                                   | 2,29 | 4,67  | 4,42 |
| 1560963_a_a<br>t | --                                           | --                                                      | --                                                                                                                                                  | 2,29 | 3,34  | 4,42 |
| 216529_at        | --                                           | --                                                      | --                                                                                                                                                  | 2,29 | 1,74  | 4,42 |
| 240979_at        | --                                           | --                                                      | --                                                                                                                                                  | 2,29 | 2,09  | 4,42 |
| 1564996_at       | 167838                                       | TXLNB                                                   | taxilin beta                                                                                                                                        | 2,29 | 1,62  | 4,42 |
| 233502_at        | 5067                                         | CNTN3                                                   | contactin 3 (plasmacytoma associated)                                                                                                               | 2,29 | 2,32  | 4,42 |
| 225081_s_at      | 55536                                        | CDCA7L                                                  | cell division cycle associated 7-like                                                                                                               | 2,29 | 2,40  | 4,42 |
| 201721_s_at      | 7805                                         | LAPTM5                                                  | lysosomal associated multispinning membrane protein 5                                                                                               | 2,29 | 4,61  | 4,42 |
| 207369_at        | 680                                          | BRS3                                                    | bombesin-like receptor 3                                                                                                                            | 2,29 | 1,96  | 4,42 |
| 1560490_at       | 120114                                       | FAT3                                                    | FAT tumor suppressor homolog 3 (Drosophila)                                                                                                         | 2,29 | 2,36  | 4,42 |
| 222888_at        | 54619                                        | CCNJ                                                    | cyclin J                                                                                                                                            | 2,29 | 2,29  | 4,42 |
| 234753_x_at      | --                                           | --                                                      | --                                                                                                                                                  | 2,29 | 2,27  | 4,42 |
| 217148_x_at      | 28815                                        | IGLV2-14                                                | immunoglobulin lambda variable 2-14                                                                                                                 | 2,29 | 29,29 | 4,42 |
| 1563985_at       | --                                           | --                                                      | --                                                                                                                                                  | 2,29 | 2,04  | 4,42 |
| 221205_at        | --                                           | --                                                      | --                                                                                                                                                  | 2,29 | 1,99  | 4,42 |
| 231316_at        | 91754                                        | NEK9                                                    | NIMA (never in mitosis gene a)- related kinase 9                                                                                                    | 2,29 | 2,48  | 4,42 |
| 213823_at        | 3207                                         | HOXA11                                                  | homeobox A11                                                                                                                                        | 2,29 | 2,15  | 4,42 |
| 206747_at        | 9721                                         | GPRIN2                                                  | G protein regulated inducer of neurite outgrowth 2                                                                                                  | 2,29 | 2,37  | 4,84 |
| 1563038_at       | --                                           | --                                                      | --                                                                                                                                                  | 2,29 | 2,93  | 4,84 |
| 209437_s_at      | 10418                                        | SPON1                                                   | spondin 1, extracellular matrix protein                                                                                                             | 2,28 | 3,25  | 4,84 |
| 1556235_at       | --                                           | --                                                      | --                                                                                                                                                  | 2,28 | 1,53  | 4,84 |
| 210529_s_at      | 9747                                         | KIAA0738                                                | KIAA0738 gene product                                                                                                                               | 2,28 | 2,26  | 4,84 |

|              |        |           |                                                                                           |      |      |      |
|--------------|--------|-----------|-------------------------------------------------------------------------------------------|------|------|------|
| 1559545_at   | 6638   | SNRPN     | small nuclear ribonucleoprotein polypeptide N                                             | 2,28 | 2,94 | 4,84 |
| 1558195_at   | 283404 | LOC283404 | hypothetical protein LOC283404                                                            | 2,28 | 2,35 | 4,84 |
| 233306_at    | --     | --        | --                                                                                        | 2,28 | 3,33 | 4,84 |
| 235616_at    | 128553 | TSHZ2     | teashirt zinc finger homeobox 2                                                           | 2,28 | 1,90 | 4,84 |
| 1568884_at   | 2244   | FGB       | fibrinogen beta chain                                                                     | 2,28 | 5,28 | 4,84 |
| 235588_at    | 157570 | ESCO2     | establishment of cohesion 1 homolog 2 ( <i>S. cerevisiae</i> )                            | 2,28 | 3,39 | 4,84 |
| 1562194_at   | 9839   | ZEB2      | zinc finger E-box binding homeobox 2                                                      | 2,28 | 2,37 | 4,84 |
| 1556352_at   | --     | --        | --                                                                                        | 2,28 | 1,69 | 4,84 |
| 212592_at    | 3512   | IGJ       | immunoglobulin J polypeptide, linker protein for immunoglobulin alpha and mu polypeptides | 2,28 | 9,05 | 4,84 |
| 1569942_at   | --     | --        | --                                                                                        | 2,28 | 1,88 | 4,84 |
| 228762_at    | 3955   | LFNG      | LFNG O-fucosylpeptide 3-beta-N-acetylglucosaminyltransferase                              | 2,28 | 1,76 | 4,84 |
| 228069_at    | 113115 | FAM54A    | family with sequence similarity 54, member A                                              | 2,28 | 3,95 | 4,84 |
| 206740_x_at  | 6847   | SYCP1     | synaptonemal complex protein 1                                                            | 2,28 | 1,91 | 4,84 |
| 234562_x_at  | 152189 | CMTM8     | CKLF-like MARVEL transmembrane domain containing 8                                        | 2,28 | 2,29 | 4,84 |
| 220792_at    | 11107  | PRDM5     | PR domain containing 5                                                                    | 2,28 | 1,92 | 4,84 |
| 239739_at    | 28966  | SNX24     | sorting nexin 24                                                                          | 2,28 | 2,79 | 4,84 |
| 1561917_at   | --     | --        | --                                                                                        | 2,28 | 2,31 | 4,84 |
| 1564547_x_at | --     | --        | --                                                                                        | 2,28 | 2,10 | 4,84 |
| 242873_at    | 22914  | KLRK1     | killer cell lectin-like receptor subfamily K, member 1                                    | 2,28 | 2,52 | 4,84 |
| 1556148_s_at | --     | --        | --                                                                                        | 2,28 | 1,81 | 4,84 |
| 219387_at    | 55704  | CCDC88A   | coiled-coil domain containing 88A                                                         | 2,28 | 2,54 | 4,84 |
| 229947_at    | 51050  | PI15      | peptidase inhibitor 15                                                                    | 2,28 | 3,07 | 4,84 |
| 201669_s_at  | 4082   | MARCKS    | myristoylated alanine-rich protein kinase C substrate                                     | 2,27 | 1,78 | 4,84 |
| 240355_at    | --     | --        | --                                                                                        | 2,27 | 4,95 | 4,84 |
| 212488_at    | 1289   | COL5A1    | collagen, type V, alpha 1                                                                 | 2,27 | 3,24 | 4,84 |



|                  |        |           |                                                                    |      |       |      |
|------------------|--------|-----------|--------------------------------------------------------------------|------|-------|------|
| 1563054_at       | --     | --        | --                                                                 | 2,27 | 2,10  | 4,84 |
| 1552887_at       | 219793 | C10orf27  | chromosome 10 open reading frame 27                                | 2,27 | 1,65  | 4,84 |
| 203922_s_at      | 1536   | CYBB      | cytochrome b-245, beta polypeptide (chronic granulomatous disease) | 2,27 | 3,37  | 4,84 |
| 237724_at        | --     | --        | --                                                                 | 2,27 | 2,95  | 4,84 |
| 238430_x_at      | 162394 | SLFN5     | schlafen family member 5                                           | 2,27 | 2,50  | 4,84 |
| 240016_at        | 26054  | SENP6     | SUMO1/sentrin specific peptidase 6                                 | 2,27 | 3,10  | 4,84 |
| 1562681_at       | 440021 | KRTAP5-2  | keratin associated protein 5-2                                     | 2,27 | 2,59  | 4,84 |
| 239017_at        | --     | --        | --                                                                 | 2,27 | 2,66  | 4,84 |
| 227662_at        | 171024 | SYNPO2    | synaptopodin 2                                                     | 2,27 | 1,98  | 4,84 |
| 1552307_a_a<br>t | 125488 | C18orf17  | chromosome 18 open reading frame 17                                | 2,27 | 3,65  | 4,84 |
| 223739_at        | --     | --        | --                                                                 | 2,27 | 2,01  | 4,84 |
| 223122_s_at      | 6423   | SFRP2     | secreted frizzled-related protein 2                                | 2,27 | 20,33 | 4,84 |
| 244668_at        | 285389 | LOC285389 | hypothetical protein LOC285389                                     | 2,27 | 1,76  | 4,84 |
| 232024_at        | 26157  | GIMAP2    | GTPase, IMAP family member 2                                       | 2,27 | 2,46  | 4,84 |
| 231111_at        | 55732  | C1orf112  | chromosome 1 open reading frame 112                                | 2,27 | 2,55  | 4,84 |
| 215642_at        | 9849   | ZNF518    | zinc finger protein 518                                            | 2,27 | 3,39  | 4,84 |
| 1566931_at       | 64216  | TFB2M     | transcription factor B2, mitochondrial                             | 2,27 | 2,57  | 4,84 |
| 232702_at        | 9910   | RABGAP1L  | RAB GTPase activating protein 1-like                               | 2,27 | 3,29  | 4,84 |
| 1553906_s_at     | 221472 | FGD2      | FYVE, RhoGEF and PH domain containing 2                            | 2,26 | 2,72  | 4,84 |
| 240431_at        | --     | --        | --                                                                 | 2,26 | 3,16  | 4,84 |
| 209398_at        | 3006   | HIST1H1C  | histone cluster 1, H1c                                             | 2,26 | 1,92  | 4,84 |
| 222969_at        | 8708   | B3GALT1   | UDP-Gal:betaGlcNAc beta 1,3-galactosyltransferase, polypeptide 1   | 2,26 | 1,89  | 4,84 |
| 211075_s_at      | 961    | CD47      | CD47 molecule                                                      | 2,26 | 1,69  | 4,84 |
| 207158_at        | 339    | APOBEC1   | apolipoprotein B mRNA editing enzyme, catalytic polypeptide 1      | 2,26 | 1,92  | 4,84 |
| 208089_s_at      | 81550  | TDRD3     | tudor domain containing 3                                          | 2,26 | 1,45  | 4,84 |
| 1557813_at       | 23635  | SSBP2     | single-stranded DNA binding protein 2                              | 2,26 | 1,85  | 4,84 |
| 240506_at        | --     | --        | --                                                                 | 2,26 | 2,50  | 4,84 |
| 234133_s_at      | --     | --        | --                                                                 | 2,26 | 2,61  | 4,84 |
| 1561292_at       | --     | --        | --                                                                 | 2,26 | 1,90  | 4,84 |
| 1560946_at       | --     | --        | --                                                                 | 2,26 | 3,40  | 4,84 |

|              |                                          |                                   |                                                                                                           |      |       |      |
|--------------|------------------------------------------|-----------------------------------|-----------------------------------------------------------------------------------------------------------|------|-------|------|
| 1570308_at   | 2547                                     | XRCC6                             | X-ray repair complementing defective repair in Chinese hamster cells 6 (Ku autoantigen, 70kDa)            | 2,26 | 2,40  | 4,84 |
| 217220_at    | 26106                                    | DKFZP586K1520                     | DKFZP586K1520 protein                                                                                     | 2,26 | 2,07  | 4,84 |
| 237656_at    | 80014                                    | WWC2                              | WW and C2 domain containing 2                                                                             | 2,26 | 2,03  | 4,84 |
| 244329_at    | --                                       | --                                | --                                                                                                        | 2,26 | 1,83  | 4,84 |
| 206700_s_at  | 8284                                     | JARID1D                           | jumonji, AT rich interactive domain 1D                                                                    | 2,26 | 13,03 | 4,84 |
| 215907_at    | 60468                                    | BACH2                             | BTB and CNC homology 1, basic leucine zipper transcription factor 2                                       | 2,26 | 2,38  | 4,84 |
| 37892_at     | 1301                                     | COL11A1                           | collagen, type XI, alpha 1                                                                                | 2,26 | 3,31  | 4,84 |
| 207909_x_at  | 1617///5<br>7054///5<br>7055///5<br>7135 | DAZ1///DAZ3/<br>//DAZ2///DAZ<br>4 | deleted in azoospermia 1///deleted in azoospermia 3///deleted in azoospermia 2///deleted in azoospermia 4 | 2,26 | 4,33  | 4,84 |
| 212587_s_at  | 5788                                     | PTPRC                             | protein tyrosine phosphatase, receptor type, C                                                            | 2,26 | 5,06  | 4,84 |
| 1553433_at   | 203238                                   | C9orf93                           | chromosome 9 open reading frame 93                                                                        | 2,26 | 2,95  | 4,84 |
| 241264_at    | 23335                                    | WDR7                              | WD repeat domain 7                                                                                        | 2,26 | 1,86  | 4,84 |
| 243356_at    | --                                       | --                                | --                                                                                                        | 2,26 | 3,33  | 4,84 |
| 211656_x_at  | 3119                                     | HLA-DQB1                          | major histocompatibility complex, class II, DQ beta 1                                                     | 2,26 | 5,34  | 4,84 |
| 1560842_a_at | 440132                                   | hCG_1815504                       | hCG1815504                                                                                                | 2,26 | 3,22  | 4,84 |
| 213036_x_at  | 489                                      | ATP2A3                            | ATPase, Ca++ transporting, ubiquitous                                                                     | 2,26 | 2,20  | 4,84 |
| 1570222_at   | 64579                                    | NDST4                             | N-deacetylase/N-sulfotransferase (heparan glucosaminyl) 4                                                 | 2,26 | 4,75  | 4,84 |
| 214883_at    | 7067                                     | THRA                              | thyroid hormone receptor, alpha (erythroblastic leukemia viral (v-erb-a) oncogene homolog, avian)         | 2,26 | 2,18  | 4,84 |
| 241566_at    | --                                       | --                                | --                                                                                                        | 2,26 | 4,87  | 4,84 |
| 224429_x_at  | 84741                                    | MGC10997                          | pseudogene MGC10997                                                                                       | 2,26 | 1,61  | 4,84 |
| 211704_s_at  | 474343//<br>/54466                       | SPIN2B///SPIN<br>2A               | spindlin family, member 2B///spindlin family, member 2A                                                   | 2,26 | 1,61  | 4,84 |
| 202411_at    | 3429                                     | IFI27                             | interferon, alpha-inducible protein 27                                                                    | 2,26 | 2,50  | 4,84 |

|              |        |           |                                                           |      |      |      |
|--------------|--------|-----------|-----------------------------------------------------------|------|------|------|
| 1563033_x_at | --     | --        | --                                                        | 2,26 | 7,79 | 4,84 |
| 1552466_x_at | 118421 | C21orf100 | chromosome 21 open reading frame 100                      | 2,26 | 2,60 | 4,84 |
| 1568924_a_at | 154865 | IQUB      | IQ motif and ubiquitin domain containing                  | 2,26 | 1,78 | 4,84 |
| 1560156_at   | --     | --        | --                                                        | 2,26 | 2,06 | 4,84 |
| 231465_at    | --     | --        | --                                                        | 2,26 | 1,91 | 4,84 |
| 241637_at    | --     | --        | --                                                        | 2,26 | 2,84 | 4,84 |
| 1569960_at   | 5350   | PLN       | phospholamban                                             | 2,25 | 2,22 | 4,84 |
| 44790_s_at   | 80183  | C13orf18  | chromosome 13 open reading frame 18                       | 2,25 | 1,91 | 4,84 |
| 1564451_at   | --     | --        | --                                                        | 2,25 | 2,19 | 4,84 |
| 214861_at    | 23081  | JMJD2C    | jumonji domain containing 2C                              | 2,25 | 1,61 | 4,84 |
| 208335_s_at  | 2532   | DARC      | Duffy blood group, chemokine receptor                     | 2,25 | 6,91 | 4,84 |
| 220330_s_at  | 64092  | SAMSN1    | SAM domain, SH3 domain and nuclear localization signals 1 | 2,25 | 4,71 | 4,84 |
| 203813_s_at  | 6586   | SLIT3     | slit homolog 3 (Drosophila)                               | 2,25 | 2,83 | 4,84 |
| 239728_at    | 2308   | FOXO1     | forkhead box O1                                           | 2,25 | 2,71 | 4,84 |
| 211050_x_at  | 388572 | LOC388572 | hypothetical LOC388572                                    | 2,25 | 1,61 | 4,84 |
| 1556760_a_at | --     | --        | --                                                        | 2,25 | 3,10 | 4,84 |
| 218663_at    | 64151  | NCAPG     | non-SMC condensin I complex, subunit G                    | 2,25 | 2,83 | 4,84 |
| 225442_at    | 4921   | DDR2      | discoidin domain receptor family, member 2                | 2,25 | 2,04 | 4,84 |
| 231038_s_at  | --     | --        | --                                                        | 2,25 | 6,12 | 4,84 |
| 222325_at    | 196475 | RMST      | rhabdomyosarcoma 2 associated transcript (non-coding RNA) | 2,25 | 4,20 | 4,84 |
| 244376_at    | 25840  | METTL7A   | methyltransferase like 7A                                 | 2,25 | 1,65 | 4,84 |
| 1553181_at   | 64794  | DDX31     | DEAD (Asp-Glu-Ala-Asp) box polypeptide 31                 | 2,25 | 2,29 | 4,84 |
| 1557780_at   | 7468   | WHSC1     | Wolf-Hirschhorn syndrome candidate 1                      | 2,25 | 3,16 | 4,84 |
| 1555024_at   | 53616  | ADAM22    | ADAM metallopeptidase domain 22                           | 2,25 | 3,93 | 4,84 |
| 226919_at    | --     | --        | --                                                        | 2,25 | 1,61 | 4,84 |
| 1555687_a_at | 170482 | CLEC4C    | C-type lectin domain family 4, member C                   | 2,25 | 2,76 | 4,84 |
| 215208_x_at  | 6165   | RPL35A    | ribosomal protein L35a                                    | 2,25 | 1,92 | 4,84 |
| 227609_at    | 94240  | EPSTI1    | epithelial stromal interaction 1 (breast)                 | 2,24 | 3,28 | 4,84 |
| 203236_s_at  | 3965   | LGALS9    | lectin, galactoside-binding, soluble, 9 (galectin 9)      | 2,24 | 3,99 | 4,84 |

|                  |                              |                          |                                                                                                                 |      |       |      |
|------------------|------------------------------|--------------------------|-----------------------------------------------------------------------------------------------------------------|------|-------|------|
| 1557609_s_at     | 23232                        | TBC1D12                  | TBC1 domain family, member 12                                                                                   | 2,24 | 1,82  | 4,84 |
| 206120_at        | 945                          | CD33                     | CD33 molecule                                                                                                   | 2,24 | 3,58  | 4,84 |
| 203240_at        | 8857                         | FCGBP                    | Fc fragment of IgG binding protein                                                                              | 2,24 | 1,88  | 4,84 |
| 1555352_at       | 93986                        | FOXP2                    | forkhead box P2                                                                                                 | 2,24 | 2,21  | 4,84 |
| 216920_s_at      | 445347//<br>/6967///<br>6983 | TARP///TRGC2<br>///TRGV9 | TCR gamma alternate reading frame protein///T cell receptor gamma constant 2///T cell receptor gamma variable 9 | 2,24 | 3,43  | 4,84 |
| 234266_at        | --                           | --                       | --                                                                                                              | 2,24 | 3,66  | 4,84 |
| 1556452_a_a<br>t | 283761                       | LOC283761                | hypothetical protein LOC283761                                                                                  | 2,24 | 2,96  | 4,84 |
| 203332_s_at      | 3635                         | INPP5D                   | inositol polyphosphate-5-phosphatase, 145kDa                                                                    | 2,24 | 3,03  | 4,84 |
| 1560527_at       | --                           | --                       | --                                                                                                              | 2,24 | 2,09  | 4,84 |
| 224546_at        | --                           | --                       | --                                                                                                              | 2,24 | 20,03 | 4,84 |
| 209083_at        | 11151                        | CORO1A                   | coronin, actin binding protein, 1A                                                                              | 2,24 | 4,43  | 4,84 |
| 233037_at        | --                           | --                       | --                                                                                                              | 2,24 | 2,22  | 4,84 |
| 205269_at        | 3937                         | LCP2                     | lymphocyte cytosolic protein 2 (SH2 domain containing leukocyte protein of 76kDa)                               | 2,24 | 3,31  | 4,84 |
| 207697_x_at      | 10288                        | LILRB2                   | leukocyte immunoglobulin-like receptor, subfamily B (with TM and ITIM domains), member 2                        | 2,24 | 2,78  | 4,84 |
| 230836_at        | 7903                         | ST8SIA4                  | ST8 alpha-N-acetyl-neuraminide alpha-2,8-sialyltransferase 4                                                    | 2,24 | 2,22  | 4,84 |
| 205495_s_at      | 10578                        | GNLY                     | granulysin                                                                                                      | 2,24 | 3,34  | 4,84 |
| 220900_at        | 80042                        | FLJ12078                 | hypothetical protein FLJ12078                                                                                   | 2,24 | 3,69  | 4,84 |
| 232924_at        | 10234                        | LRRC17                   | leucine rich repeat containing 17                                                                               | 2,23 | 2,77  | 4,84 |
| 216509_x_at      | 8028                         | MLLT10                   | myeloid/lymphoid or mixed-lineage leukemia (trithorax homolog, Drosophila); translocated to, 10                 | 2,23 | 1,78  | 4,84 |
| 235681_at        | 3017                         | HIST1H2BD                | histone cluster 1, H2bd                                                                                         | 2,23 | 2,57  | 4,84 |
| 238575_at        | 114880                       | OSBPL6                   | oxysterol binding protein-like 6                                                                                | 2,23 | 4,57  | 4,84 |
| 214768_x_at      | --                           | --                       | --                                                                                                              | 2,23 | 2,14  | 4,84 |
| 233908_x_at      | --                           | --                       | --                                                                                                              | 2,23 | 2,37  | 4,84 |
| 1562976_at       | --                           | --                       | --                                                                                                              | 2,23 | 2,67  | 4,84 |
| 229564_at        | 253190                       | SERHL2                   | serine hydrolase-like 2                                                                                         | 2,23 | 1,82  | 4,84 |

|             |                   |                     |                                                                                                                                                                                     |      |      |      |
|-------------|-------------------|---------------------|-------------------------------------------------------------------------------------------------------------------------------------------------------------------------------------|------|------|------|
| 216865_at   | 7373              | COL14A1             | collagen, type XIV, alpha 1 (undulin)                                                                                                                                               | 2,23 | 1,63 | 4,84 |
| 215590_x_at | --                | --                  | --                                                                                                                                                                                  | 2,23 | 1,70 | 4,84 |
| 219424_at   | 10148             | EBI3                | Epstein-Barr virus induced gene 3                                                                                                                                                   | 2,23 | 3,11 | 4,84 |
| 244651_at   | --                | --                  | --                                                                                                                                                                                  | 2,23 | 2,04 | 4,84 |
| 241023_at   | 7405              | UVRAG               | UV radiation resistance associated gene                                                                                                                                             | 2,23 | 3,26 | 4,84 |
| 219779_at   | 79776             | ZFHX4               | zinc finger homeobox 4                                                                                                                                                              | 2,23 | 3,75 | 4,84 |
| 215368_at   | 4703              | NEB                 | nebulin                                                                                                                                                                             | 2,23 | 3,16 | 4,84 |
| 244521_at   | 128553            | TSHZ2               | teashirt zinc finger homeobox 2                                                                                                                                                     | 2,23 | 3,54 | 4,84 |
| 232110_at   | --                | --                  | --                                                                                                                                                                                  | 2,23 | 2,25 | 4,84 |
| 207120_at   | 63934             | ZNF667              | zinc finger protein 667                                                                                                                                                             | 2,23 | 1,90 | 4,84 |
| 231247_s_at | --                | --                  | --                                                                                                                                                                                  | 2,23 | 1,92 | 4,84 |
| 210994_x_at | 373               | TRIM23              | tripartite motif-containing 23                                                                                                                                                      | 2,23 | 4,93 | 4,84 |
| 1562249_at  | 285965            | LOC285965           | hypothetical protein LOC285965                                                                                                                                                      | 2,22 | 4,11 | 4,84 |
| 208046_at   | 8359              | HIST1H4A            | histone cluster 1, H4a                                                                                                                                                              | 2,22 | 2,08 | 4,84 |
| 210128_s_at | 1241              | LTB4R               | leukotriene B4 receptor                                                                                                                                                             | 2,22 | 3,85 | 4,84 |
| 1561956_at  | 64067             | NPAS3               | neuronal PAS domain protein 3                                                                                                                                                       | 2,22 | 2,10 | 4,84 |
| 221521_s_at | 51659             | GINS2               | GINS complex subunit 2 (Psf2 homolog)                                                                                                                                               | 2,22 | 1,85 | 4,84 |
| 1562800_at  | --                | --                  | --                                                                                                                                                                                  | 2,22 | 2,86 | 4,84 |
| 242733_at   | 3248              | HPGD                | hydroxyprostaglandin dehydrogenase 15-(NAD)                                                                                                                                         | 2,22 | 5,40 | 4,84 |
| 241871_at   | 814               | CAMK4               | calcium/calmodulin-dependent protein kinase IV                                                                                                                                      | 2,22 | 4,65 | 4,84 |
| 1570424_at  | --                | --                  | --                                                                                                                                                                                  | 2,22 | 2,24 | 4,84 |
| 203418_at   | 890               | CCNA2               | cyclin A2                                                                                                                                                                           | 2,22 | 1,69 | 4,84 |
| 239669_at   | 8351              | HIST1H3D            | histone cluster 1, H3d                                                                                                                                                              | 2,22 | 2,54 | 4,84 |
| 211133_x_at | 10288///<br>11025 | LILRB2///LILR<br>B3 | leukocyte immunoglobulin-like receptor, subfamily B (with TM and ITIM domains), member 2///leukocyte immunoglobulin-like receptor, subfamily B (with TM and ITIM domains), member 3 | 2,22 | 2,44 | 4,84 |
| 215801_at   | --                | --                  | --                                                                                                                                                                                  | 2,22 | 2,41 | 4,84 |
| 205285_s_at | 2533              | FYB                 | FYN binding protein (FYB-120/130)                                                                                                                                                   | 2,22 | 5,51 | 4,84 |
| 1561953_at  | --                | --                  | --                                                                                                                                                                                  | 2,22 | 3,02 | 4,84 |
| 240073_at   | --                | --                  | --                                                                                                                                                                                  | 2,22 | 5,01 | 4,84 |

|              |        |         |                                                                            |      |      |      |
|--------------|--------|---------|----------------------------------------------------------------------------|------|------|------|
| 237877_at    | 5429   | POLH    | polymerase (DNA directed), eta                                             | 2,22 | 1,88 | 4,84 |
| 1562933_at   | --     | --      | --                                                                         | 2,22 | 3,07 | 4,84 |
| 242208_at    | --     | --      | --                                                                         | 2,22 | 1,91 | 4,84 |
| 1569557_at   | 57209  | ZNF248  | zinc finger protein 248                                                    | 2,21 | 2,99 | 4,84 |
| 1554631_at   | 472    | ATM     | ataxia telangiectasia mutated                                              | 2,21 | 2,22 | 5,40 |
| 1565786_x_at | --     | --      | --                                                                         | 2,21 | 1,63 | 5,40 |
| 222958_s_at  | 55635  | DEPDC1  | DEP domain containing 1                                                    | 2,21 | 3,04 | 5,40 |
| 239317_at    | --     | --      | --                                                                         | 2,21 | 3,61 | 5,40 |
| 213060_s_at  | 1117   | CHI3L2  | chitinase 3-like 2                                                         | 2,21 | 3,09 | 5,40 |
| 1566487_at   | 407738 | FAM19A1 | family with sequence similarity 19 (chemokine (C-C motif)-like), member A1 | 2,21 | 2,90 | 5,40 |
| 1554637_a_at | 9139   | CBFA2T2 | core-binding factor, runt domain, alpha subunit 2; translocated to, 2      | 2,21 | 2,16 | 5,40 |
| 206983_at    | 1235   | CCR6    | chemokine (C-C motif) receptor 6                                           | 2,21 | 2,48 | 5,40 |
| 239959_x_at  | 5140   | PDE3B   | phosphodiesterase 3B, cGMP-inhibited                                       | 2,21 | 1,77 | 5,40 |
| 1557118_a_at | 26512  | INTS6   | integrator complex subunit 6                                               | 2,21 | 2,55 | 5,40 |
| 1560370_x_at | --     | --      | --                                                                         | 2,21 | 2,09 | 5,40 |
| 1557348_at   | --     | --      | --                                                                         | 2,21 | 5,83 | 5,40 |
| 1563080_at   | --     | --      | --                                                                         | 2,21 | 4,51 | 5,40 |
| 218589_at    | 10161  | P2RY5   | purinergic receptor P2Y, G-protein coupled, 5                              | 2,21 | 1,56 | 5,40 |
| 1552658_a_at | 89795  | NAV3    | neuron navigator 3                                                         | 2,21 | 2,90 | 5,40 |
| 1569491_at   | --     | --      | --                                                                         | 2,21 | 3,49 | 5,40 |
| 1563465_at   | 168507 | PKD1L1  | polycystic kidney disease 1 like 1                                         | 2,21 | 4,01 | 5,40 |
| 214329_x_at  | 8743   | TNFSF10 | tumor necrosis factor (ligand) superfamily, member 10                      | 2,21 | 1,53 | 5,40 |
| 242754_at    | --     | --      | --                                                                         | 2,21 | 2,76 | 5,40 |
| 216488_s_at  | 23250  | ATP11A  | ATPase, Class VI, type 11A                                                 | 2,20 | 2,85 | 5,40 |
| 1570594_at   | 120224 | TMEM45B | transmembrane protein 45B                                                  | 2,20 | 3,01 | 5,40 |
| 235444_at    | 27086  | FOXP1   | forkhead box P1                                                            | 2,20 | 2,11 | 5,40 |
| 219719_at    | 51751  | HIGD1B  | HIG1 domain family, member 1B                                              | 2,20 | 6,04 | 5,40 |
| 1569354_at   | --     | --      | --                                                                         | 2,20 | 3,05 | 5,40 |

|              |        |           |                                                                           |      |      |      |
|--------------|--------|-----------|---------------------------------------------------------------------------|------|------|------|
| 204153_s_at  | 4242   | MFNG      | MFNG O-fucosylpeptide 3-beta-N-acetylglucosaminyltransferase              | 2,20 | 1,88 | 5,40 |
| 1566426_at   | --     | --        | --                                                                        | 2,20 | 1,92 | 5,40 |
| 239340_at    | --     | --        | --                                                                        | 2,20 | 2,48 | 5,40 |
| 216524_x_at  | --     | --        | --                                                                        | 2,20 | 1,75 | 5,40 |
| 1552570_at   | 54084  | C21orf29  | chromosome 21 open reading frame 29                                       | 2,20 | 2,93 | 5,40 |
| 219968_at    | 51385  | ZNF589    | zinc finger protein 589                                                   | 2,20 | 1,83 | 5,40 |
| 234101_at    | 93556  | C3orf50   | chromosome 3 open reading frame 50                                        | 2,20 | 2,44 | 5,40 |
| 241853_at    | --     | --        | --                                                                        | 2,20 | 1,56 | 5,40 |
| 241826_x_at  | --     | --        | --                                                                        | 2,20 | 1,75 | 5,40 |
| 1558216_at   | 254848 | LOC254848 | hypothetical protein LOC254848                                            | 2,20 | 2,52 | 5,40 |
| 1560069_at   | 389072 | LOC389072 | hypothetical protein LOC389072                                            | 2,20 | 1,89 | 5,40 |
| 233832_at    | --     | --        | --                                                                        | 2,20 | 3,14 | 5,40 |
| 1562093_at   | --     | --        | --                                                                        | 2,20 | 3,15 | 5,40 |
| 223897_at    | 91661  | ZNF765    | zinc finger protein 765                                                   | 2,20 | 3,46 | 5,40 |
| 1568986_x_at | 51604  | PIGT      | phosphatidylinositol glycan anchor biosynthesis, class T                  | 2,20 | 2,23 | 5,40 |
| 1567247_at   | 26341  | OR5H1     | olfactory receptor, family 5, subfamily H, member 1                       | 2,20 | 2,37 | 5,40 |
| 1554826_at   | 65061  | ALS2CR7   | amyotrophic lateral sclerosis 2 (juvenile) chromosome region, candidate 7 | 2,20 | 3,05 | 5,40 |
| 1560431_at   | --     | --        | --                                                                        | 2,20 | 6,46 | 5,40 |
| 1559695_a_at | 9229   | DLGAP1    | discs, large (Drosophila) homolog-associated protein 1                    | 2,20 | 3,09 | 5,40 |
| 215618_at    | 6251   | RSU1      | Ras suppressor protein 1                                                  | 2,20 | 2,67 | 5,40 |
| 1557224_at   | 55711  | MLSTD1    | male sterility domain containing 1                                        | 2,20 | 1,95 | 5,40 |
| 237898_at    | --     | --        | --                                                                        | 2,20 | 2,14 | 5,40 |
| 236280_at    | --     | --        | --                                                                        | 2,19 | 4,48 | 5,40 |
| 209846_s_at  | 11118  | BTN3A2    | butyrophilin, subfamily 3, member A2                                      | 2,19 | 2,79 | 5,40 |
| 1557845_at   | 26973  | CHORDC1   | cysteine and histidine-rich domain (CHORD)-containing 1                   | 2,19 | 1,70 | 5,40 |
| 219593_at    | 51296  | SLC15A3   | solute carrier family 15, member 3                                        | 2,19 | 2,02 | 5,40 |
| 227561_at    | 4921   | DDR2      | discoidin domain receptor family, member 2                                | 2,19 | 2,31 | 5,40 |
| 206546_at    | 10388  | SYCP2     | synaptonemal complex protein 2                                            | 2,19 | 2,72 | 5,40 |

|              |        |           |                                                                                                 |      |       |      |
|--------------|--------|-----------|-------------------------------------------------------------------------------------------------|------|-------|------|
| 223502_s_at  | 10673  | TNFSF13B  | tumor necrosis factor (ligand) superfamily, member 13b                                          | 2,19 | 3,02  | 5,40 |
| 233436_at    | 27085  | MTBP      | Mdm2, transformed 3T3 cell double minute 2, p53 binding protein (mouse) binding protein, 104kDa | 2,19 | 2,18  | 5,40 |
| 224228_s_at  | 11105  | PRDM7     | PR domain containing 7                                                                          | 2,19 | 4,88  | 5,40 |
| 1569665_at   | --     | --        | --                                                                                              | 2,19 | 1,91  | 5,40 |
| 207173_x_at  | 1009   | CDH11     | cadherin 11, type 2, OB-cadherin (osteoblast)                                                   | 2,19 | 2,51  | 5,40 |
| 234962_at    | --     | --        | --                                                                                              | 2,19 | 1,83  | 5,40 |
| 202357_s_at  | 629    | CFB       | complement factor B                                                                             | 2,19 | 2,66  | 5,40 |
| 244530_at    | 202151 | RANBP3L   | RAN binding protein 3-like                                                                      | 2,19 | 2,60  | 5,40 |
| 240194_at    | --     | --        | --                                                                                              | 2,19 | 1,57  | 5,40 |
| 220274_at    | 79781  | IQCA      | IQ motif containing with AAA domain                                                             | 2,19 | 2,39  | 5,40 |
| 223344_s_at  | 58475  | MS4A7     | membrane-spanning 4-domains, subfamily A, member 7                                              | 2,19 | 3,05  | 5,40 |
| 243565_at    | --     | --        | --                                                                                              | 2,19 | 3,14  | 5,40 |
| 226365_at    | --     | --        | --                                                                                              | 2,19 | 2,31  | 5,40 |
| 1560661_x_at | 150759 | LOC150759 | hypothetical protein LOC150759                                                                  | 2,19 | 1,96  | 5,40 |
| 1563032_at   | --     | --        | --                                                                                              | 2,19 | 7,64  | 5,40 |
| 234492_at    | --     | --        | --                                                                                              | 2,19 | 1,89  | 5,40 |
| 1562456_at   | --     | --        | --                                                                                              | 2,19 | 2,67  | 5,40 |
| 1566887_x_at | --     | --        | --                                                                                              | 2,19 | 2,41  | 5,40 |
| 220011_at    | 79000  | C1orf135  | chromosome 1 open reading frame 135                                                             | 2,19 | 5,78  | 5,40 |
| 211411_at    | 2523   | FUT1      | fucosyltransferase 1 (galactoside 2-alpha-L-fucosyltransferase, H blood group)                  | 2,18 | 1,83  | 5,40 |
| 203184_at    | 2201   | FBN2      | fibrillin 2 (congenital contractural arachnodactyly)                                            | 2,18 | 2,94  | 5,40 |
| 233444_at    | 80821  | DDHD1     | DDHD domain containing 1                                                                        | 2,18 | 1,59  | 5,40 |
| 219183_s_at  | 27128  | PSCD4     | pleckstrin homology, Sec7 and coiled-coil domains 4                                             | 2,18 | 3,46  | 5,40 |
| 230391_at    | --     | --        | --                                                                                              | 2,18 | 10,62 | 5,40 |
| 202345_s_at  | 2171   | FABP5     | fatty acid binding protein 5 (psoriasis-associated)                                             | 2,18 | 2,83  | 5,40 |



|                                                                                          |        |          |                                                                  |       |      |      |
|------------------------------------------------------------------------------------------|--------|----------|------------------------------------------------------------------|-------|------|------|
| 238564_at                                                                                | 165215 | KIAA1946 | KIAA1946                                                         | 2,18  | 1,76 | 5,40 |
| 234051_at                                                                                | --     | --       | --                                                               | 2,18  | 2,10 | 5,40 |
| 1568736_s_at                                                                             | 9229   | DLGAP1   | discs, large (Drosophila) homolog-associated protein 1           | 2,18  | 1,77 | 5,40 |
| <b>Probe sets lower expressed in posttransplant biopsies in paired analysis (N=2609)</b> |        |          |                                                                  |       |      |      |
| 202768_at                                                                                | 2354   | FOSB     | FBJ murine osteosarcoma viral oncogene homolog B                 | -8,06 | 0,04 | 0,00 |
| 201531_at                                                                                | 7538   | ZFP36    | zinc finger protein 36, C3H type, homolog (mouse)                | -7,62 | 0,10 | 0,00 |
| 202672_s_at                                                                              | 467    | ATF3     | activating transcription factor 3                                | -6,32 | 0,14 | 0,00 |
| 209189_at                                                                                | 2353   | FOS      | v-fos FBJ murine osteosarcoma viral oncogene homolog             | -6,23 | 0,08 | 0,00 |
| 240960_at                                                                                | 4478   | MSN      | moesin                                                           | -6,16 | 0,31 | 0,00 |
| 202284_s_at                                                                              | 1026   | CDKN1A   | cyclin-dependent kinase inhibitor 1A (p21, Cip1)                 | -6,09 | 0,16 | 0,00 |
| 226982_at                                                                                | 22936  | ELL2     | elongation factor, RNA polymerase II, 2                          | -5,98 | 0,21 | 0,00 |
| 2335--6_at                                                                               | --     | --       | --                                                               | -5,98 | 0,37 | 0,00 |
| 203888_at                                                                                | 7056   | THBD     | thrombomodulin                                                   | -5,80 | 0,23 | 0,00 |
| 225557_at                                                                                | 64651  | AXUD1    | AXIN1 up-regulated 1                                             | -5,75 | 0,26 | 0,00 |
| 213006_at                                                                                | 1052   | CEBPD    | CCAAT/enhancer binding protein (C/EBP), delta                    | -5,74 | 0,21 | 0,00 |
| 240038_at                                                                                | 22936  | ELL2     | elongation factor, RNA polymerase II, 2                          | -5,70 | 0,24 | 0,00 |
| 205193_at                                                                                | 23764  | MAFF     | v-maf musculoaponeurotic fibrosarcoma oncogene homolog F (avian) | -5,56 | 0,14 | 0,00 |
| 36711_at                                                                                 | 23764  | MAFF     | v-maf musculoaponeurotic fibrosarcoma oncogene homolog F (avian) | -5,54 | 0,13 | 0,00 |
| 237672_at                                                                                | --     | --       | --                                                               | -5,54 | 0,22 | 0,00 |
| 208961_s_at                                                                              | 1316   | KLF6     | Kruppel-like factor 6                                            | -5,48 | 0,23 | 0,00 |
| 204575_s_at                                                                              | 4327   | MMP19    | matrix metalloproteinase 19                                      | -5,43 | 0,15 | 0,00 |
| 203887_s_at                                                                              | 7056   | THBD     | thrombomodulin                                                   | -5,40 | 0,27 | 0,00 |
| 209959_at                                                                                | 8013   | NR4A3    | nuclear receptor subfamily 4, group A, member 3                  | -5,38 | 0,12 | 0,00 |

|             |        |          |                                                                                               |       |      |      |
|-------------|--------|----------|-----------------------------------------------------------------------------------------------|-------|------|------|
| 202628_s_at | 5054   | SERPINE1 | serpin peptidase inhibitor, clade E (nexin, plasminogen activator inhibitor type 1), member 1 | -5,37 | 0,16 | 0,00 |
| 211143_x_at | 3164   | NR4A1    | nuclear receptor subfamily 4, group A, member 1                                               | -5,35 | 0,14 | 0,00 |
| 221102_s_at | 140803 | TRPM6    | transient receptor potential cation channel, subfamily M, member 6                            | -5,34 | 0,23 | 0,00 |
| 204709_s_at | 9493   | KIF23    | kinesin family member 23                                                                      | -5,28 | 0,29 | 0,00 |
| 238835_at   | --     | --       | --                                                                                            | -5,28 | 0,21 | 0,00 |
| 218880_at   | 2355   | FOSL2    | FOS-like antigen 2                                                                            | -5,27 | 0,26 | 0,00 |
| 230511_at   | 1390   | CREM     | cAMP responsive element modulator                                                             | -5,22 | 0,35 | 0,00 |
| 235419_at   | 54206  | ERRFI1   | ERBB receptor feedback inhibitor 1                                                            | -5,19 | 0,15 | 0,00 |
| 224657_at   | 54206  | ERRFI1   | ERBB receptor feedback inhibitor 1                                                            | -5,16 | 0,26 | 0,00 |
| 229868_s_at | 9518   | GDF15    | growth differentiation factor 15                                                              | -5,13 | 0,19 | 0,00 |
| 1558836_at  | --     | --       | --                                                                                            | -5,13 | 0,20 | 0,00 |
| 202883_s_at | 5519   | PPP2R1B  | protein phosphatase 2 (formerly 2A), regulatory subunit A, beta isoform                       | -5,00 | 0,38 | 0,00 |
| 226099_at   | 22936  | ELL2     | elongation factor, RNA polymerase II, 2                                                       | -5,00 | 0,38 | 0,00 |
| 213319_s_at | 8531   | CSDA     | cold shock domain protein A                                                                   | -4,96 | 0,31 | 0,00 |
| 221577_x_at | 9518   | GDF15    | growth differentiation factor 15                                                              | -4,95 | 0,17 | 0,00 |
| 213497_at   | 25841  | ABTB2    | ankyrin repeat and BTB (POZ) domain containing 2                                              | -4,90 | 0,28 | 0,00 |
| 217257_at   | 3925   | STMN1    | stathmin 1/oncoprotein 18                                                                     | -4,87 | 0,34 | 0,00 |
| 223800_s_at | 96626  | LIMS3    | LIM and senescent cell antigen-like domains 3                                                 | -4,86 | 0,22 | 0,00 |
| 211197_s_at | 23308  | ICOSLG   | inducible T-cell co-stimulator ligand                                                         | -4,86 | 0,35 | 0,00 |
| 213560_at   | 4616   | GADD45B  | growth arrest and DNA-damage-inducible, beta                                                  | -4,83 | 0,30 | 0,00 |
| 205302_at   | 3484   | IGFBP1   | insulin-like growth factor binding protein 1                                                  | -4,83 | 0,18 | 0,00 |
| 228634_s_at | 8531   | CSDA     | cold shock domain protein A                                                                   | -4,77 | 0,33 | 0,00 |
| 233485_at   | --     | --       | --                                                                                            | -4,75 | 0,29 | 0,00 |
| 209674_at   | 1407   | CRY1     | cryptochrome 1 (photolyase-like)                                                              | -4,74 | 0,35 | 0,00 |
| 203543_s_at | 687    | KLF9     | Kruppel-like factor 9                                                                         | -4,70 | 0,37 | 0,00 |
| 244299_at   | --     | --       | --                                                                                            | -4,69 | 0,30 | 0,00 |

|              |        |           |                                                                             |       |      |      |
|--------------|--------|-----------|-----------------------------------------------------------------------------|-------|------|------|
| 244424_at    | 439938 | LOC439938 | hypothetical gene supported by NM_178534                                    | -4,66 | 0,28 | 0,00 |
| 237031_at    | 401623 | LOC401623 | similar to LINE-1 reverse transcriptase homolog                             | -4,65 | 0,11 | 0,00 |
| 214613_at    | 2827   | GPR3      | G protein-coupled receptor 3                                                | -4,63 | 0,14 | 0,00 |
| 219496_at    | 65124  | ANKRD57   | ankyrin repeat domain 57                                                    | -4,62 | 0,29 | 0,00 |
| 209209_s_at  | 10979  | PLEKHC1   | pleckstrin homology domain containing, family C (with FERM domain) member 1 | -4,62 | 0,33 | 0,00 |
| 228325_at    | 23514  | KIAA0146  | KIAA0146                                                                    | -4,61 | 0,33 | 0,00 |
| 212089_at    | 4000   | LMNA      | lamin A/C                                                                   | -4,60 | 0,30 | 0,00 |
| 240260_at    | 5770   | PTPN1     | protein tyrosine phosphatase, non-receptor type 1                           | -4,57 | 0,23 | 0,00 |
| 1568768_s_at | 9577   | BRE       | brain and reproductive organ-expressed (TNFRSF1A modulator)                 | -4,57 | 0,17 | 0,00 |
| 226333_at    | 3570   | IL6R      | interleukin 6 receptor                                                      | -4,53 | 0,35 | 0,00 |
| 207574_s_at  | 4616   | GADD45B   | growth arrest and DNA-damage-inducible, beta                                | -4,52 | 0,32 | 0,00 |
| 212665_at    | 25976  | TIPARP    | TCDD-inducible poly(ADP-ribose) polymerase                                  | -4,50 | 0,32 | 0,00 |
| 208078_s_at  | 150094 | SNF1LK    | SNF1-like kinase                                                            | -4,50 | 0,25 | 0,00 |
| 225597_at    | 57210  | SLC45A4   | solute carrier family 45, member 4                                          | -4,45 | 0,29 | 0,00 |
| 206136_at    | 7855   | FZD5      | frizzled homolog 5 (Drosophila)                                             | -4,45 | 0,32 | 0,00 |
| 219911_s_at  | 28231  | SLCO4A1   | solute carrier organic anion transporter family, member 4A1                 | -4,44 | 0,23 | 0,00 |
| 227099_s_at  | 387763 | LOC387763 | hypothetical LOC387763                                                      | -4,44 | 0,37 | 0,00 |
| 205293_x_at  | 10458  | BAIAP2    | BAI1-associated protein 2                                                   | -4,43 | 0,27 | 0,00 |
| 214696_at    | 84981  | MGC14376  | hypothetical protein MGC14376                                               | -4,43 | 0,39 | 0,00 |
| 224856_at    | 2289   | FKBP5     | FK506 binding protein 5                                                     | -4,43 | 0,21 | 0,00 |
| 227828_s_at  | 84141  | TMEM166   | transmembrane protein 166                                                   | -4,41 | 0,32 | 0,00 |
| 1562321_at   | 5166   | PDK4      | pyruvate dehydrogenase kinase, isozyme 4                                    | -4,40 | 0,22 | 0,00 |
| 205207_at    | 3569   | IL6       | interleukin 6 (interferon, beta 2)                                          | -4,39 | 0,19 | 0,00 |
| 213692_s_at  | --     | --        | --                                                                          | -4,39 | 0,27 | 0,00 |
| 221031_s_at  | 81575  | APOLD1    | apolipoprotein L domain containing 1                                        | -4,39 | 0,19 | 0,00 |
| 200730_s_at  | 7803   | PTP4A1    | protein tyrosine phosphatase type IVA, member 1                             | -4,38 | 0,40 | 0,00 |

|              |                    |                      |                                                                                       |       |      |      |
|--------------|--------------------|----------------------|---------------------------------------------------------------------------------------|-------|------|------|
| 237263_at    | --                 | --                   | --                                                                                    | -4,38 | 0,21 | 0,00 |
| 227333_at    | 123879             | DCUN1D3              | DCN1, defective in cullin neddylation 1, domain containing 3 ( <i>S. cerevisiae</i> ) | -4,37 | 0,46 | 0,27 |
| 208707_at    | 1983               | EIF5                 | eukaryotic translation initiation factor 5                                            | -4,36 | 0,47 | 0,27 |
| 225213_at    | 160760             | PPTC7                | PTC7 protein phosphatase homolog ( <i>S. cerevisiae</i> )                             | -4,34 | 0,46 | 0,27 |
| 223264_at    | 59274              | MESDC1               | mesoderm development candidate 1                                                      | -4,33 | 0,32 | 0,27 |
| 229551_x_at  | 195828             | ZNF367               | zinc finger protein 367                                                               | -4,33 | 0,29 | 0,27 |
| 38037_at     | 1839               | HBEGF                | heparin-binding EGF-like growth factor                                                | -4,31 | 0,24 | 0,27 |
| 223467_at    | 51655              | RASD1                | RAS, dexamethasone-induced 1                                                          | -4,30 | 0,20 | 0,27 |
| 244677_at    | --                 | --                   | --                                                                                    | -4,30 | 0,23 | 0,27 |
| 212803_at    | 4665               | NAB2                 | NGFI-A binding protein 2 (EGR1 binding protein 2)                                     | -4,28 | 0,32 | 0,27 |
| 214056_at    | 4170               | MCL1                 | myeloid cell leukemia sequence 1 (BCL2-related)                                       | -4,27 | 0,32 | 0,27 |
| 1562749_at   | --                 | --                   | --                                                                                    | -4,27 | 0,36 | 0,27 |
| 1555832_s_at | 1316               | KLF6                 | Kruppel-like factor 6                                                                 | -4,26 | 0,41 | 0,27 |
| 226578_s_at  | 1843               | DUSP1                | dual specificity phosphatase 1                                                        | -4,25 | 0,29 | 0,27 |
| 212122_at    | 23433///<br>284988 | RHOQ///LOC2<br>84988 | ras homolog gene family, member Q///hypothetical LOC284988                            | -4,25 | 0,48 | 0,44 |
| 201739_at    | 6446               | SGK                  | serum/glucocorticoid regulated kinase                                                 | -4,24 | 0,41 | 0,44 |
| 227034_at    | 65124              | ANKRD57              | ankyrin repeat domain 57                                                              | -4,23 | 0,40 | 0,44 |
| 206683_at    | 7718               | ZNF165               | zinc finger protein 165                                                               | -4,23 | 0,29 | 0,44 |
| 228698_at    | 83595              | SOX7                 | SRY (sex determining region Y)-box 7                                                  | -4,23 | 0,33 | 0,44 |
| 204637_at    | 1081               | CGA                  | glycoprotein hormones, alpha polypeptide                                              | -4,22 | 0,29 | 0,44 |
| 221489_s_at  | 81848              | SPRY4                | sprouty homolog 4 ( <i>Drosophila</i> )                                               | -4,21 | 0,29 | 0,44 |
| 226328_at    | 83855              | KLF16                | Kruppel-like factor 16                                                                | -4,20 | 0,31 | 0,44 |
| 206605_at    | 8909               | P11                  | 26 serine protease                                                                    | -4,19 | 0,20 | 0,44 |
| 218786_at    | 51559              | NT5DC3               | 5'-nucleotidase domain containing 3                                                   | -4,19 | 0,34 | 0,44 |
| 224692_at    | 84919              | PPP1R15B             | protein phosphatase 1, regulatory (inhibitor) subunit 15B                             | -4,18 | 0,41 | 0,44 |
| 206236_at    | 2828               | GPR4                 | G protein-coupled receptor 4                                                          | -4,16 | 0,35 | 0,44 |
| 217625_x_at  | --                 | --                   | --                                                                                    | -4,15 | 0,41 | 0,44 |
| 230746_s_at  | 6781               | STC1                 | stanniocalcin 1                                                                       | -4,13 | 0,34 | 0,44 |

|             |        |         |                                                                    |       |      |      |
|-------------|--------|---------|--------------------------------------------------------------------|-------|------|------|
| 1569097_at  | 7158   | TP53BP1 | tumor protein p53 binding protein, 1                               | -4,13 | 0,43 | 0,44 |
| 240389_at   | 140803 | TRPM6   | transient receptor potential cation channel, subfamily M, member 6 | -4,12 | 0,24 | 0,44 |
| 227309_at   | 55432  | YOD1    | YOD1 OTU deubiquinating enzyme 1 homolog (S. cerevisiae)           | -4,11 | 0,41 | 0,44 |
| 15595--9_at | --     | --      | --                                                                 | -4,11 | 0,40 | 0,44 |
| 202859_x_at | 3576   | IL8     | interleukin 8                                                      | -4,09 | 0,24 | 0,44 |
| 215990_s_at | 604    | BCL6    | B-cell CLL/lymphoma 6 (zinc finger protein 51)                     | -4,07 | 0,29 | 0,63 |
| 209992_at   | 5208   | PFKFB2  | 6-phosphofructo-2-kinase/fructose-2,6-biphosphatase 2              | -4,07 | 0,21 | 0,63 |
| 213688_at   | 801    | CALM1   | calmodulin 1 (phosphorylase kinase, delta)                         | -4,06 | 0,36 | 0,63 |
| 229509_at   | 256471 | MFSD8   | major facilitator superfamily domain containing 8                  | -4,04 | 0,47 | 0,63 |
| 210852_s_at | 10157  | AASS    | aminoadipate-semialdehyde synthase                                 | -4,04 | 0,39 | 0,63 |
| 1569852_at  | 286006 | C7orf53 | chromosome 7 open reading frame 53                                 | -4,04 | 0,43 | 0,63 |
| 217741_s_at | 7763   | ZFAND5  | zinc finger, AN1-type domain 5                                     | -4,03 | 0,41 | 0,63 |
| 204597_x_at | 6781   | STC1    | stanniocalcin 1                                                    | -4,02 | 0,35 | 0,63 |
| 24268--_at  | --     | --      | --                                                                 | -4,02 | 0,38 | 0,63 |
| 201473_at   | 3726   | JUNB    | jun B proto-oncogene                                               | -4,01 | 0,40 | 0,63 |
| 234066_at   | 9173   | IL1RL1  | interleukin 1 receptor-like 1                                      | -4,01 | 0,28 | 0,63 |
| 201328_at   | 2114   | ETS2    | v-ets erythroblastosis virus E26 oncogene homolog 2 (avian)        | -4,00 | 0,44 | 0,63 |
| 228858_at   | --     | --      | --                                                                 | -3,99 | 0,25 | 0,63 |
| 244026_at   | 22936  | ELL2    | elongation factor, RNA polymerase II, 2                            | -3,99 | 0,31 | 0,63 |
| 208891_at   | 1848   | DUSP6   | dual specificity phosphatase 6                                     | -3,97 | 0,43 | 0,63 |
| 214235_at   | 1577   | CYP3A5  | cytochrome P450, family 3, subfamily A, polypeptide 5              | -3,97 | 0,28 | 0,63 |
| 244524_at   | 7849   | PAX8    | paired box 8                                                       | -3,96 | 0,34 | 0,63 |
| 239380_at   | 202299 | C5orf27 | chromosome 5 open reading frame 27                                 | -3,96 | 0,31 | 0,63 |
| 226733_at   | 5208   | PFKFB2  | 6-phosphofructo-2-kinase/fructose-2,6-biphosphatase 2              | -3,96 | 0,40 | 0,63 |
| 1557852_at  | 1912   | PHC2    | polyhomeotic homolog 2 (Drosophila)                                | -3,95 | 0,32 | 0,63 |
| 214064_at   | 7018   | TF      | transferrin                                                        | -3,93 | 0,33 | 0,63 |

|              |        |          |                                                                                                          |       |      |      |
|--------------|--------|----------|----------------------------------------------------------------------------------------------------------|-------|------|------|
| 214600_at    | 7003   | TEAD1    | TEA domain family member 1 (SV40 transcriptional enhancer factor)                                        | -3,93 | 0,46 | 0,63 |
| 205975_s_at  | 3231   | HOXD1    | homeobox D1                                                                                              | -3,93 | 0,36 | 0,63 |
| 208622_s_at  | 7430   | VIL2     | villin 2 (ezrin)                                                                                         | -3,92 | 0,44 | 0,63 |
| 200797_s_at  | 4170   | MCL1     | myeloid cell leukemia sequence 1 (BCL2-related)                                                          | -3,92 | 0,51 | 0,63 |
| 224836_at    | 58476  | TP53INP2 | tumor protein p53 inducible nuclear protein 2                                                            | -3,91 | 0,42 | 0,63 |
| 231697_s_at  | 81671  | TMEM49   | transmembrane protein 49                                                                                 | -3,91 | 0,45 | 0,64 |
| 233730_at    | 57579  | FAM135A  | family with sequence similarity 135, member A                                                            | -3,90 | 0,40 | 0,64 |
| 236105_at    | 65986  | ZBTB10   | zinc finger and BTB domain containing 10                                                                 | -3,90 | 0,53 | 0,64 |
| 41386_i_at   | --     | --       | --                                                                                                       | -3,90 | 0,28 | 0,64 |
| 202627_s_at  | 5054   | SERPINE1 | serpin peptidase inhibitor, clade E (nexin, plasminogen activator inhibitor type 1), member 1            | -3,89 | 0,29 | 0,64 |
| 1556145_a_at | --     | --       | --                                                                                                       | -3,89 | 0,48 | 0,64 |
| 226497_s_at  | 2321   | FLT1     | fms-related tyrosine kinase 1 (vascular endothelial growth factor/vascular permeability factor receptor) | -3,89 | 0,40 | 0,64 |
| 210262_at    | 7180   | CRISP2   | cysteine-rich secretory protein 2                                                                        | -3,87 | 0,30 | 0,64 |
| 226075_at    | 80176  | SPSB1    | splA/ryanodine receptor domain and SOCS box containing 1                                                 | -3,86 | 0,27 | 0,64 |
| 216248_s_at  | 4929   | NR4A2    | nuclear receptor subfamily 4, group A, member 2                                                          | -3,85 | 0,30 | 0,64 |
| 231179_at    | 117283 | IHPK3    | inositol hexaphosphate kinase 3                                                                          | -3,85 | 0,24 | 0,64 |
| 214234_s_at  | 1577   | CYP3A5   | cytochrome P450, family 3, subfamily A, polypeptide 5                                                    | -3,84 | 0,27 | 0,64 |
| 215739_s_at  | 10426  | TUBGCP3  | tubulin, gamma complex associated protein 3                                                              | -3,84 | 0,30 | 0,64 |
| 204420_at    | 8061   | FOSL1    | FOS-like antigen 1                                                                                       | -3,83 | 0,30 | 0,64 |
| 1555628_a_at | 84868  | HAVCR2   | hepatitis A virus cellular receptor 2                                                                    | -3,83 | 0,48 | 0,64 |
| 1554086_at   | 10426  | TUBGCP3  | tubulin, gamma complex associated protein 3                                                              | -3,82 | 0,39 | 0,64 |

|              |        |          |                                                                         |       |      |      |
|--------------|--------|----------|-------------------------------------------------------------------------|-------|------|------|
| 214945_at    | 285596 | NY-REN-7 | NY-REN-7 antigen                                                        | -3,82 | 0,42 | 0,64 |
| 205266_at    | 3976   | LIF      | leukemia inhibitory factor (cholinergic differentiation factor)         | -3,80 | 0,23 | 0,64 |
| 213146_at    | --     | --       | --                                                                      | -3,80 | 0,32 | 0,64 |
| 210833_at    | 5733   | PTGER3   | prostaglandin E receptor 3 (subtype EP3)                                | -3,78 | 0,30 | 0,64 |
| 238178_at    | --     | --       | --                                                                      | -3,78 | 0,41 | 0,64 |
| 1555251_a_at | 9381   | OTOF     | otoferlin                                                               | -3,78 | 0,41 | 0,64 |
| 232539_at    | 8835   | SOCS2    | suppressor of cytokine signaling 2                                      | -3,78 | 0,35 | 0,64 |
| 209355_s_at  | 8613   | PPAP2B   | phosphatidic acid phosphatase type 2B                                   | -3,77 | 0,37 | 0,64 |
| 225539_at    | 49854  | ZNF295   | zinc finger protein 295                                                 | -3,77 | 0,42 | 0,64 |
| 241765_at    | 1368   | CPM      | carboxypeptidase M                                                      | -3,76 | 0,36 | 0,64 |
| 203737_s_at  | 23082  | PPRC1    | peroxisome proliferator-activated receptor gamma, coactivator-related 1 | -3,76 | 0,45 | 0,64 |
| 218696_at    | 9451   | EIF2AK3  | eukaryotic translation initiation factor 2-alpha kinase 3               | -3,76 | 0,34 | 0,64 |
| 201694_s_at  | 1958   | EGR1     | early growth response 1                                                 | -3,75 | 0,36 | 0,64 |
| 208960_s_at  | 1316   | KLF6     | Kruppel-like factor 6                                                   | -3,75 | 0,32 | 0,64 |
| 219475_at    | 29948  | OSGIN1   | oxidative stress induced growth inhibitor 1                             | -3,75 | 0,38 | 0,64 |
| 1566967_at   | 81848  | SPRY4    | sprouty homolog 4 (Drosophila)                                          | -3,75 | 0,31 | 0,64 |
| 202014_at    | 23645  | PPP1R15A | protein phosphatase 1, regulatory (inhibitor) subunit 15A               | -3,75 | 0,42 | 0,64 |
| 230458_at    | 50651  | SLC45A1  | solute carrier family 45, member 1                                      | -3,74 | 0,40 | 0,64 |
| 213663_s_at  | --     | --       | --                                                                      | -3,74 | 0,31 | 0,64 |
| 213281_at    | --     | --       | --                                                                      | -3,74 | 0,33 | 0,64 |
| 218012_at    | 64061  | TSPYL2   | TSPY-like 2                                                             | -3,72 | 0,39 | 0,64 |
| 228559_at    | --     | --       | --                                                                      | -3,72 | 0,48 | 0,64 |
| 235019_at    | 1368   | CPM      | carboxypeptidase M                                                      | -3,71 | 0,34 | 0,64 |
| 1554283_at   | 25819  | CCRN4L   | CCR4 carbon catabolite repression 4-like ( <i>S. cerevisiae</i> )       | -3,71 | 0,32 | 0,64 |
| 239391_at    | --     | --       | --                                                                      | -3,71 | 0,34 | 0,64 |
| 201041_s_at  | 1843   | DUSP1    | dual specificity phosphatase 1                                          | -3,70 | 0,37 | 0,64 |
| 203373_at    | 8835   | SOCS2    | suppressor of cytokine signaling 2                                      | -3,69 | 0,44 | 0,64 |
| 244787_at    | --     | --       | --                                                                      | -3,69 | 0,30 | 0,64 |

|                  |        |          |                                                                                                          |       |      |      |
|------------------|--------|----------|----------------------------------------------------------------------------------------------------------|-------|------|------|
| 209457_at        | 1847   | DUSP5    | dual specificity phosphatase 5                                                                           | -3,67 | 0,36 | 0,64 |
| 205945_at        | 3570   | IL6R     | interleukin 6 receptor                                                                                   | -3,67 | 0,36 | 0,64 |
| 215681_at        | 85368  | KIAA1654 | KIAA1654 protein                                                                                         | -3,67 | 0,38 | 0,64 |
| 211382_s_at      | 10579  | TACC2    | transforming, acidic coiled-coil containing protein 2                                                    | -3,66 | 0,35 | 0,64 |
| 229472_at        | --     | --       | --                                                                                                       | -3,66 | 0,48 | 0,64 |
| 227038_at        | 166929 | SGMS2    | sphingomyelin synthase 2                                                                                 | -3,65 | 0,42 | 0,64 |
| 220370_s_at      | 57602  | USP36    | ubiquitin specific peptidase 36                                                                          | -3,65 | 0,45 | 0,64 |
| 221020_s_at      | 81034  | SLC25A32 | solute carrier family 25, member 32                                                                      | -3,64 | 0,54 | 0,64 |
| 235706_at        | 1368   | CPM      | carboxypeptidase M                                                                                       | -3,64 | 0,50 | 0,64 |
| 1564072_at       | 84176  | MYH16    | myosin, heavy chain 16                                                                                   | -3,64 | 0,38 | 0,64 |
| 226206_at        | 7975   | MAFK     | v-maf musculoaponeurotic fibrosarcoma oncogene homolog K (avian)                                         | -3,64 | 0,47 | 0,64 |
| 207213_s_at      | 9099   | USP2     | ubiquitin specific peptidase 2                                                                           | -3,64 | 0,28 | 0,64 |
| 208152_s_at      | 9188   | DDX21    | DEAD (Asp-Glu-Ala-Asp) box polypeptide 21                                                                | -3,64 | 0,52 | 0,64 |
| 208370_s_at      | 1827   | RCAN1    | regulator of calcineurin 1                                                                               | -3,64 | 0,55 | 0,64 |
| 202716_at        | 5770   | PTPN1    | protein tyrosine phosphatase, non-receptor type 1                                                        | -3,63 | 0,34 | 0,81 |
| 214805_at        | 1973   | EIF4A1   | eukaryotic translation initiation factor 4A, isoform 1                                                   | -3,63 | 0,39 | 0,81 |
| 201236_s_at      | 7832   | BTG2     | BTG family, member 2                                                                                     | -3,62 | 0,41 | 0,81 |
| 1562013_a_a<br>t | 143384 | C10orf46 | chromosome 10 open reading frame 46                                                                      | -3,62 | 0,50 | 0,81 |
| 226498_at        | 2321   | FLT1     | fms-related tyrosine kinase 1 (vascular endothelial growth factor/vascular permeability factor receptor) | -3,62 | 0,36 | 0,81 |
| 235744_at        | 160760 | PPTC7    | PTC7 protein phosphatase homolog (S. cerevisiae)                                                         | -3,62 | 0,36 | 0,81 |
| 225207_at        | 5166   | PDK4     | pyruvate dehydrogenase kinase, isozyme 4                                                                 | -3,62 | 0,35 | 0,81 |
| 23--995_at       | --     | --       | --                                                                                                       | -3,61 | 0,41 | 0,81 |
| 224840_at        | 2289   | FKBP5    | FK506 binding protein 5                                                                                  | -3,61 | 0,30 | 0,81 |
| 223217_s_at      | 64332  | NFKBIZ   | nuclear factor of kappa light polypeptide gene enhancer in B-cells inhibitor, zeta                       | -3,61 | 0,35 | 0,81 |
| 239203_at        | 286006 | C7orf53  | chromosome 7 open reading frame 53                                                                       | -3,61 | 0,30 | 0,81 |
| 201466_s_at      | 3725   | JUN      | jun oncogene                                                                                             | -3,61 | 0,37 | 0,81 |



|             |       |         |                                                                                                 |       |      |      |
|-------------|-------|---------|-------------------------------------------------------------------------------------------------|-------|------|------|
| 201693_s_at | 1958  | EGR1    | early growth response 1                                                                         | -3,61 | 0,25 | 0,81 |
| 204560_at   | 2289  | FKBP5   | FK506 binding protein 5                                                                         | -3,61 | 0,32 | 0,81 |
| 217557_s_at | --    | --      | --                                                                                              | -3,61 | 0,46 | 0,81 |
| 213076_at   | 80271 | ITPKC   | inositol 1,4,5-trisphosphate 3-kinase C                                                         | -3,60 | 0,42 | 0,81 |
| 202289_s_at | 10579 | TACC2   | transforming, acidic coiled-coil containing protein 2                                           | -3,60 | 0,42 | 0,81 |
| 202210_x_at | 2931  | GSK3A   | glycogen synthase kinase 3 alpha                                                                | -3,60 | 0,43 | 0,81 |
| 236621_at   | 6232  | RPS27   | ribosomal protein S27 (metalloproteinase 1)                                                     | -3,60 | 0,45 | 0,81 |
| 207543_s_at | 5033  | P4HA1   | procollagen-proline, 2-oxoglutarate 4-dioxygenase (proline 4-hydroxylase), alpha polypeptide I  | -3,60 | 0,55 | 0,81 |
| 204200_s_at | 5155  | PDGFB   | platelet-derived growth factor beta polypeptide (simian sarcoma viral (v-sis) oncogene homolog) | -3,59 | 0,35 | 0,81 |
| 203725_at   | 1647  | GADD45A | growth arrest and DNA-damage-inducible, alpha                                                   | -3,59 | 0,43 | 0,81 |
| 242809_at   | 9173  | IL1RL1  | interleukin 1 receptor-like 1                                                                   | -3,59 | 0,26 | 0,81 |
| 229139_at   | 56704 | JPH1    | junctophilin 1                                                                                  | -3,58 | 0,41 | 0,81 |
| 227404_s_at | 1958  | EGR1    | early growth response 1                                                                         | -3,57 | 0,40 | 0,81 |
| 224920_x_at | 91663 | MYADM   | myeloid-associated differentiation marker                                                       | -3,56 | 0,36 | 0,81 |
| 203542_s_at | 687   | KLF9    | Kruppel-like factor 9                                                                           | -3,56 | 0,41 | 0,81 |
| 208893_s_at | 1848  | DUSP6   | dual specificity phosphatase 6                                                                  | -3,56 | 0,40 | 0,81 |
| 208892_s_at | 1848  | DUSP6   | dual specificity phosphatase 6                                                                  | -3,56 | 0,46 | 0,81 |
| 226201_at   | 84444 | DOT1L   | DOT1-like, histone H3 methyltransferase ( <i>S. cerevisiae</i> )                                | -3,55 | 0,33 | 0,81 |
| 239615_at   | --    | --      | --                                                                                              | -3,55 | 0,40 | 0,81 |
| 202431_s_at | 4609  | MYC     | v-myc myelocytomatosis viral oncogene homolog (avian)                                           | -3,55 | 0,35 | 0,81 |
| 244447_at   | 7071  | KLF10   | Kruppel-like factor 10                                                                          | -3,55 | 0,40 | 0,81 |
| 244665_at   | 3655  | ITGA6   | integrin, alpha 6                                                                               | -3,55 | 0,38 | 0,81 |
| 237323_at   | 80201 | HKDC1   | hexokinase domain containing 1                                                                  | -3,55 | 0,37 | 0,81 |
| 213407_at   | 23035 | PHLPPL  | PH domain and leucine rich repeat protein phosphatase-like                                      | -3,55 | 0,51 | 0,81 |
| 201161_s_at | 8531  | CSDA    | cold shock domain protein A                                                                     | -3,54 | 0,48 | 0,81 |

|                    |        |          |                                                                    |       |      |      |
|--------------------|--------|----------|--------------------------------------------------------------------|-------|------|------|
| 209305_s_at        | 4616   | GADD45B  | growth arrest and DNA-damage-inducible, beta                       | -3,54 | 0,43 | 0,81 |
| 217649_at          | --     | --       | --                                                                 | -3,54 | 0,33 | 0,81 |
| 212127_at          | 5905   | RANGAP1  | Ran GTPase activating protein 1                                    | -3,54 | 0,49 | 0,81 |
| 243590_at          | 8622   | PDE8B    | phosphodiesterase 8B                                               | -3,53 | 0,41 | 0,81 |
| 1553746_a_at       | 283310 | C12orf64 | chromosome 12 open reading frame 64                                | -3,53 | 0,32 | 0,81 |
| 237018_at          | 11214  | AKAP13   | A kinase (PRKA) anchor protein 13                                  | -3,53 | 0,53 | 0,81 |
| AFFX-r2-Bsdap-3_at | #N/A   | #N/A     | #N/A                                                               | -3,53 | 0,50 | 0,81 |
| 214057_at          | 4170   | MCL1     | myeloid cell leukemia sequence 1 (BCL2-related)                    | -3,53 | 0,54 | 0,81 |
| 203643_at          | 2077   | ERF      | Ets2 repressor factor                                              | -3,53 | 0,37 | 0,81 |
| 242931_at          | --     | --       | --                                                                 | -3,52 | 0,39 | 0,91 |
| 228854_at          | --     | --       | --                                                                 | -3,52 | 0,28 | 0,91 |
| 237252_at          | 7056   | THBD     | thrombomodulin                                                     | -3,51 | 0,44 | 0,91 |
| 204512_at          | 3096   | HIVEP1   | human immunodeficiency virus type I enhancer binding protein 1     | -3,51 | 0,48 | 0,91 |
| 229926_at          | --     | --       | --                                                                 | -3,51 | 0,51 | 0,91 |
| 202340_x_at        | 3164   | NR4A1    | nuclear receptor subfamily 4, group A, member 1                    | -3,50 | 0,32 | 0,91 |
| 207667_s_at        | 5606   | MAP2K3   | mitogen-activated protein kinase kinase 3                          | -3,50 | 0,40 | 0,91 |
| 224466_s_at        | 4097   | MAFG     | v-maf musculoaponeurotic fibrosarcoma oncogene homolog G (avian)   | -3,50 | 0,44 | 0,91 |
| 206100_at          | 1368   | CPM      | carboxypeptidase M                                                 | -3,49 | 0,42 | 0,91 |
| 201329_s_at        | 2114   | ETS2     | v-ets erythroblastosis virus E26 oncogene homolog 2 (avian)        | -3,49 | 0,31 | 0,91 |
| 219312_s_at        | 65986  | ZBTB10   | zinc finger and BTB domain containing 10                           | -3,49 | 0,40 | 0,91 |
| 239404_at          | 7150   | TOP1     | topoisomerase (DNA) I                                              | -3,49 | 0,50 | 0,91 |
| 224412_s_at        | 140803 | TRPM6    | transient receptor potential cation channel, subfamily M, member 6 | -3,49 | 0,26 | 0,91 |
| 212501_at          | 1051   | CEBPB    | CCAAT/enhancer binding protein (C/EBP), beta                       | -3,48 | 0,34 | 0,91 |
| 222830_at          | 29841  | GRHL1    | grainyhead-like 1 (Drosophila)                                     | -3,48 | 0,46 | 0,91 |
| 231393_x_at        | 23099  | ZBTB43   | zinc finger and BTB domain containing 43                           | -3,47 | 0,47 | 0,91 |

|              |       |              |                                                                                      |       |      |      |
|--------------|-------|--------------|--------------------------------------------------------------------------------------|-------|------|------|
| 205883_at    | 7704  | ZBTB16       | zinc finger and BTB domain containing 16                                             | -3,46 | 0,37 | 0,91 |
| 228947_x_at  | 79652 | C16orf30     | chromosome 16 open reading frame 30                                                  | -3,46 | 0,43 | 0,91 |
| 221764_at    | 91300 | C19orf22     | chromosome 19 open reading frame 22                                                  | -3,46 | 0,47 | 0,91 |
| 234534_at    | 4128  | MAOA         | monoamine oxidase A                                                                  | -3,46 | 0,50 | 0,91 |
| 202320_at    | 2975  | GTF3C1       | general transcription factor IIIC, polypeptide 1, alpha 220kDa                       | -3,45 | 0,45 | 0,91 |
| 204622_x_at  | 4929  | NR4A2        | nuclear receptor subfamily 4, group A, member 2                                      | -3,45 | 0,30 | 0,91 |
| 202241_at    | 10221 | TRIB1        | tribbles homolog 1 (Drosophila)                                                      | -3,45 | 0,54 | 0,91 |
| 221841_s_at  | 9314  | KLF4         | Kruppel-like factor 4 (gut)                                                          | -3,44 | 0,38 | 0,91 |
| 202884_s_at  | 5519  | PPP2R1B      | protein phosphatase 2 (formerly 2A), regulatory subunit A, beta isoform              | -3,44 | 0,40 | 0,91 |
| 202613_at    | 1503  | CTPS         | CTP synthase                                                                         | -3,44 | 0,47 | 0,91 |
| 238-68_at    | --    | --           | --                                                                                   | -3,43 | 0,43 | 0,91 |
| 226638_at    | 57636 | ARHGAP23     | Rho GTPase activating protein 23                                                     | -3,43 | 0,47 | 0,91 |
| 223321_s_at  | 53834 | FGFRL1       | fibroblast growth factor receptor-like 1                                             | -3,43 | 0,43 | 0,91 |
| 201465_s_at  | 3725  | JUN          | jun oncogene                                                                         | -3,43 | 0,36 | 0,91 |
| 225954_s_at  | 90007 | MIDN         | midnolin                                                                             | -3,42 | 0,45 | 0,91 |
| 227073_at    | 10746 | MAP3K2       | mitogen-activated protein kinase kinase kinase 2                                     | -3,42 | 0,57 | 0,91 |
| 231858_x_at  | 91056 | DKFZp761E198 | DKFZp761E198 protein                                                                 | -3,42 | 0,41 | 0,91 |
| 218510_x_at  | 54463 | FAM134B      | family with sequence similarity 134, member B                                        | -3,42 | 0,39 | 0,91 |
| 224606_at    | 1316  | KLF6         | Kruppel-like factor 6                                                                | -3,42 | 0,48 | 1,05 |
| 1556469_s_at | --    | --           | --                                                                                   | -3,41 | 0,40 | 1,05 |
| 213450_s_at  | 23308 | ICOSLG       | inducible T-cell co-stimulator ligand                                                | -3,41 | 0,38 | 1,05 |
| 220046_s_at  | 57018 | CCNL1        | cyclin L1                                                                            | -3,41 | 0,56 | 1,05 |
| 241843_at    | 1983  | EIF5         | eukaryotic translation initiation factor 5                                           | -3,41 | 0,45 | 1,05 |
| 225262_at    | 2355  | FOSL2        | FOS-like antigen 2                                                                   | -3,41 | 0,35 | 1,05 |
| 243586_at    | 5144  | PDE4D        | phosphodiesterase 4D, cAMP-specific (phosphodiesterase E3 dunce homolog, Drosophila) | -3,41 | 0,45 | 1,05 |
| 236117_at    | --    | --           | --                                                                                   | -3,41 | 0,51 | 1,05 |

|              |        |           |                                                                         |       |      |      |
|--------------|--------|-----------|-------------------------------------------------------------------------|-------|------|------|
| 213710_s_at  | 801    | CALM1     | calmodulin 1 (phosphorylase kinase, delta)                              | -3,41 | 0,39 | 1,05 |
| 227529_s_at  | 9590   | AKAP12    | A kinase (PRKA) anchor protein (gravin) 12                              | -3,41 | 0,46 | 1,05 |
| 202886_s_at  | 5519   | PPP2R1B   | protein phosphatase 2 (formerly 2A), regulatory subunit A, beta isoform | -3,40 | 0,40 | 1,05 |
| 206085_s_at  | 1491   | CTH       | cystathionase (cystathionine gamma-lyase)                               | -3,40 | 0,50 | 1,05 |
| 227280_s_at  | 151195 | CCNYL1    | cyclin Y-like 1                                                         | -3,40 | 0,56 | 1,05 |
| 1558837_a_at | --     | --        | --                                                                      | -3,40 | 0,36 | 1,05 |
| 209502_s_at  | 10458  | BAIAP2    | BAI1-associated protein 2                                               | -3,39 | 0,41 | 1,05 |
| 2433--2_at   | --     | --        | --                                                                      | -3,39 | 0,39 | 1,05 |
| 238753_at    | 23413  | FREQ      | frequenin homolog (Drosophila)                                          | -3,39 | 0,38 | 1,05 |
| 224801_at    | 54602  | NDFIP2    | Nedd4 family interacting protein 2                                      | -3,39 | 0,53 | 1,05 |
| 220977_x_at  | 57669  | EPB41L5   | erythrocyte membrane protein band 4.1 like 5                            | -3,39 | 0,47 | 1,05 |
| 205231_s_at  | 7957   | EPM2A     | epilepsy, progressive myoclonus type 2A, Lafora disease (laforin)       | -3,39 | 0,59 | 1,05 |
| 215177_s_at  | 3655   | ITGA6     | integrin, alpha 6                                                       | -3,39 | 0,45 | 1,05 |
| 202055_at    | 3836   | KPNA1     | karyopherin alpha 1 (importin alpha 5)                                  | -3,38 | 0,54 | 1,05 |
| 239572_at    | --     | --        | --                                                                      | -3,38 | 0,32 | 1,05 |
| 212666_at    | 57154  | SMURF1    | SMAD specific E3 ubiquitin protein ligase 1                             | -3,38 | 0,38 | 1,05 |
| 202925_s_at  | 5326   | PLAGL2    | pleiomorphic adenoma gene-like 2                                        | -3,38 | 0,47 | 1,05 |
| 1557724_a_at | 285847 | LOC285847 | hypothetical protein LOC285847                                          | -3,37 | 0,28 | 1,05 |
| 200732_s_at  | 7803   | PTP4A1    | protein tyrosine phosphatase type IVA, member 1                         | -3,37 | 0,56 | 1,05 |
| 225612_s_at  | 84002  | B3GNT5    | UDP-GlcNAc:betaGal beta-1,3-N-acetylglucosaminyltransferase 5           | -3,37 | 0,43 | 1,05 |
| 200731_s_at  | 7803   | PTP4A1    | protein tyrosine phosphatase type IVA, member 1                         | -3,37 | 0,50 | 1,05 |
| 2391--3_at   | --     | --        | --                                                                      | -3,37 | 0,48 | 1,05 |
| 214581_x_at  | 27242  | TNFRSF21  | tumor necrosis factor receptor superfamily, member 21                   | -3,37 | 0,40 | 1,05 |
| 226143_at    | 10743  | RAI1      | retinoic acid induced 1                                                 | -3,37 | 0,49 | 1,05 |
| 203003_at    | 4209   | MEF2D     | myocyte enhancer factor 2D                                              | -3,37 | 0,41 | 1,05 |
| 1554067_at   | 144577 | FLJ32549  | hypothetical protein FLJ32549                                           | -3,37 | 0,45 | 1,05 |

|             |        |           |                                                                                                 |       |      |      |
|-------------|--------|-----------|-------------------------------------------------------------------------------------------------|-------|------|------|
| 224917_at   | 406991 | MIRN21    | microRNA 21                                                                                     | -3,37 | 0,45 | 1,05 |
| 203821_at   | 1839   | HBEGF     | heparin-binding EGF-like growth factor                                                          | -3,36 | 0,32 | 1,05 |
| 202861_at   | 5187   | PER1      | period homolog 1 (Drosophila)                                                                   | -3,36 | 0,32 | 1,05 |
| 210845_s_at | 5329   | PLAUR     | plasminogen activator, urokinase receptor                                                       | -3,36 | 0,38 | 1,05 |
| 242571_at   | 9185   | REPS2     | RALBP1 associated Eps domain containing 2                                                       | -3,36 | 0,40 | 1,05 |
| 1564796_at  | 2012   | EMP1      | epithelial membrane protein 1                                                                   | -3,36 | 0,35 | 1,05 |
| 202923_s_at | 2729   | GCLC      | glutamate-cysteine ligase, catalytic subunit                                                    | -3,36 | 0,49 | 1,05 |
| 214447_at   | 2113   | ETS1      | v-ets erythroblastosis virus E26 oncogene homolog 1 (avian)                                     | -3,35 | 0,38 | 1,05 |
| 212008_at   | 23190  | UBXD2     | UBX domain containing 2                                                                         | -3,35 | 0,58 | 1,05 |
| 229337_at   | 9099   | USP2      | ubiquitin specific peptidase 2                                                                  | -3,35 | 0,41 | 1,05 |
| 1568611_at  | 8974   | P4HA2     | procollagen-proline, 2-oxoglutarate 4-dioxygenase (proline 4-hydroxylase), alpha polypeptide II | -3,35 | 0,44 | 1,05 |
| 1552590_at  | 94160  | ABCC12    | ATP-binding cassette, sub-family C (CFTR/MRP), member 12                                        | -3,35 | 0,53 | 1,05 |
| 206410_at   | 8431   | NROB2     | nuclear receptor subfamily 0, group B, member 2                                                 | -3,34 | 0,29 | 1,05 |
| 229577_at   | 137964 | AGPAT6    | 1-acylglycerol-3-phosphate O-acyltransferase 6 (lysophosphatidic acid acyltransferase, zeta)    | -3,34 | 0,53 | 1,05 |
| 231892_at   | 84904  | C9orf100  | chromosome 9 open reading frame 100                                                             | -3,34 | 0,49 | 1,05 |
| 1568765_at  | 5054   | SERPINE1  | serpin peptidase inhibitor, clade E (nexin, plasminogen activator inhibitor type 1), member 1   | -3,33 | 0,38 | 1,05 |
| 239161_at   | 2230   | FDX1      | ferredoxin 1                                                                                    | -3,33 | 0,53 | 1,05 |
| 228846_at   | 4084   | MXD1      | MAX dimerization protein 1                                                                      | -3,33 | 0,47 | 1,05 |
| 208691_at   | 7037   | TFRC      | transferrin receptor (p90, CD71)                                                                | -3,33 | 0,48 | 1,05 |
| 202932_at   | 7525   | YES1      | v-yes-1 Yamaguchi sarcoma viral oncogene homolog 1                                              | -3,33 | 0,53 | 1,05 |
| 222570_at   | 23413  | FREQ      | frequenin homolog (Drosophila)                                                                  | -3,33 | 0,33 | 1,05 |
| 1557049_at  | 149478 | LOC149478 | hypothetical protein LOC149478                                                                  | -3,33 | 0,46 | 1,05 |
| 231699_at   | 4792   | NFKBIA    | nuclear factor of kappa light polypeptide gene enhancer in B-cells inhibitor, alpha             | -3,32 | 0,51 | 1,05 |

|                  |        |             |                                                                               |       |      |      |
|------------------|--------|-------------|-------------------------------------------------------------------------------|-------|------|------|
| 221704_s_at      | 79720  | VPS37B      | vacuolar protein sorting 37 homolog B ( <i>S. cerevisiae</i> )                | -3,32 | 0,38 | 1,05 |
| 242656_at        | --     | --          | --                                                                            | -3,32 | 0,43 | 1,05 |
| 211179_at        | 861    | RUNX1       | runt-related transcription factor 1 (acute myeloid leukemia 1; aml1 oncogene) | -3,32 | 0,52 | 1,05 |
| 217911_s_at      | 9531   | BAG3        | BCL2-associated athanogene 3                                                  | -3,32 | 0,44 | 1,20 |
| 238018_at        | 285016 | hCG_1990170 | hypothetical protein LOC285016                                                | -3,32 | 0,34 | 1,20 |
| 205325_at        | 9796   | PHYHIP      | phytanoyl-CoA 2-hydroxylase interacting protein                               | -3,31 | 0,36 | 1,20 |
| 200769_s_at      | 4144   | MAT2A       | methionine adenosyltransferase II, alpha                                      | -3,31 | 0,42 | 1,20 |
| 1561266_at       | --     | --          | --                                                                            | -3,31 | 0,53 | 1,20 |
| 216249_at        | 5820   | PVT1        | Pvt1 oncogene homolog, MYC activator (mouse)                                  | -3,30 | 0,55 | 1,20 |
| 242905_at        | 56902  | PNO1        | partner of NOB1 homolog ( <i>S. cerevisiae</i> )                              | -3,30 | 0,45 | 1,20 |
| 233927_at        | 51663  | ZFR         | zinc finger RNA binding protein                                               | -3,29 | 0,44 | 1,20 |
| 204363_at        | 2152   | F3          | coagulation factor III (thromboplastin, tissue factor)                        | -3,29 | 0,40 | 1,20 |
| 237594_at        | --     | --          | --                                                                            | -3,29 | 0,46 | 1,20 |
| 235477_at        | --     | --          | --                                                                            | -3,29 | 0,45 | 1,20 |
| 200798_x_at      | 4170   | MCL1        | myeloid cell leukemia sequence 1 (BCL2-related)                               | -3,29 | 0,44 | 1,20 |
| 220180_at        | 80323  | CCDC68      | coiled-coil domain containing 68                                              | -3,28 | 0,50 | 1,20 |
| 238822_at        | 11222  | MRPL3       | mitochondrial ribosomal protein L3                                            | -3,28 | 0,52 | 1,20 |
| 209763_at        | 91851  | CHRD1       | chordin-like 1                                                                | -3,28 | 0,39 | 1,20 |
| 239087_at        | 257629 | ANKS4B      | ankyrin repeat and sterile alpha motif domain containing 4B                   | -3,28 | 0,42 | 1,20 |
| 230764_at        | 23731  | C9orf5      | chromosome 9 open reading frame 5                                             | -3,27 | 0,45 | 1,20 |
| 243398_at        | 9379   | NRXN2       | neurexin 2                                                                    | -3,27 | 0,45 | 1,20 |
| 206875_s_at      | 9748   | SLK         | STE20-like kinase (yeast)                                                     | -3,27 | 0,48 | 1,20 |
| 203044_at        | 22856  | CHSY1       | carbohydrate (chondroitin) synthase 1                                         | -3,27 | 0,50 | 1,20 |
| 24--63--_at      | --     | --          | --                                                                            | -3,27 | 0,49 | 1,20 |
| 1556617_a_a<br>t | --     | --          | --                                                                            | -3,27 | 0,47 | 1,20 |
| 229893_at        | 257019 | FRMD3       | FERM domain containing 3                                                      | -3,26 | 0,49 | 1,20 |

|                  |        |          |                                                                         |       |      |      |
|------------------|--------|----------|-------------------------------------------------------------------------|-------|------|------|
| 221904_at        | 131408 | FAM131A  | family with sequence similarity 131, member A                           | -3,26 | 0,46 | 1,20 |
| 218113_at        | 23670  | TMEM2    | transmembrane protein 2                                                 | -3,26 | 0,40 | 1,20 |
| 225446_at        | 54014  | BRWD1    | bromodomain and WD repeat domain containing 1                           | -3,25 | 0,59 | 1,20 |
| 235548_at        | 164284 | APCDD1L  | adenomatosis polyposis coli down-regulated 1-like                       | -3,25 | 0,39 | 1,20 |
| 225598_at        | 57210  | SLC45A4  | solute carrier family 45, member 4                                      | -3,25 | 0,53 | 1,20 |
| 209774_x_at      | 2920   | CXCL2    | chemokine (C-X-C motif) ligand 2                                        | -3,25 | 0,25 | 1,20 |
| 223961_s_at      | 1154   | CISH     | cytokine inducible SH2-containing protein                               | -3,25 | 0,42 | 1,20 |
| 204596_s_at      | 6781   | STC1     | stanniocalcin 1                                                         | -3,24 | 0,37 | 1,20 |
| 212373_at        | 10116  | FEM1B    | fem-1 homolog b (C. elegans)                                            | -3,24 | 0,54 | 1,20 |
| 217943_s_at      | 55700  | MAP7D1   | MAP7 domain containing 1                                                | -3,24 | 0,51 | 1,20 |
| 232136_s_at      | 83992  | CTTNBP2  | cortactin binding protein 2                                             | -3,24 | 0,45 | 1,20 |
| 238450_at        | 5208   | PFKFB2   | 6-phosphofructo-2-kinase/fructose-2,6-biphosphatase 2                   | -3,24 | 0,37 | 1,20 |
| 231930_at        | 55531  | ELMOD1   | ELMO/CED-12 domain containing 1                                         | -3,24 | 0,41 | 1,20 |
| 203690_at        | 10426  | TUBGCP3  | tubulin, gamma complex associated protein 3                             | -3,24 | 0,52 | 1,20 |
| 217139_at        | 7416   | VDAC1    | voltage-dependent anion channel 1                                       | -3,23 | 0,50 | 1,20 |
| 1553721_at       | 220441 | RNF152   | ring finger protein 152                                                 | -3,23 | 0,39 | 1,20 |
| 227762_at        | --     | --       | --                                                                      | -3,23 | 0,38 | 1,20 |
| 241495_at        | 57018  | CCNL1    | cyclin L1                                                               | -3,23 | 0,48 | 1,24 |
| 1554586_a_a<br>t | 23221  | RHOBTB2  | Rho-related BTB domain containing 2                                     | -3,23 | 0,36 | 1,24 |
| 202539_s_at      | 3156   | HMGCR    | 3-hydroxy-3-methylglutaryl-Coenzyme A reductase                         | -3,23 | 0,42 | 1,24 |
| 231343_at        | 22862  | FNDC3A   | fibronectin type III domain containing 3A                               | -3,23 | 0,46 | 1,24 |
| 241193_at        | 2114   | ETS2     | v-ets erythroblastosis virus E26 oncogene homolog 2 (avian)             | -3,22 | 0,40 | 1,24 |
| 2314--3_at       | --     | --       | --                                                                      | -3,22 | 0,45 | 1,24 |
| 221223_x_at      | 1154   | CISH     | cytokine inducible SH2-containing protein                               | -3,22 | 0,43 | 1,24 |
| 217542_at        | 4193   | MDM2     | Mdm2, transformed 3T3 cell double minute 2, p53 binding protein (mouse) | -3,22 | 0,45 | 1,24 |
| 223756_at        | 55683  | FLJ10081 | hypothetical protein FLJ10081                                           | -3,22 | 0,43 | 1,24 |

|              |        |          |                                                                                         |       |      |      |
|--------------|--------|----------|-----------------------------------------------------------------------------------------|-------|------|------|
| 222865_x_at  | 79652  | C16orf30 | chromosome 16 open reading frame 30                                                     | -3,22 | 0,47 | 1,24 |
| 1558292_s_at | 284098 | PIGW     | phosphatidylinositol glycan anchor biosynthesis, class W                                | -3,22 | 0,46 | 1,24 |
| 213353_at    | 23461  | ABCA5    | ATP-binding cassette, sub-family A (ABC1), member 5                                     | -3,22 | 0,51 | 1,24 |
| 220953_s_at  | 54545  | MTMR12   | myotubularin related protein 12                                                         | -3,22 | 0,48 | 1,24 |
| 242687_at    | --     | --       | --                                                                                      | -3,22 | 0,46 | 1,24 |
| 226759_at    | 64375  | IKZF4    | IKAROS family zinc finger 4 (Eos)                                                       | -3,22 | 0,56 | 1,24 |
| 236200_at    | 11124  | FAF1     | Fas (TNFRSF6) associated factor 1                                                       | -3,22 | 0,52 | 1,24 |
| 1553529_at   | 80834  | TAS1R2   | taste receptor, type 1, member 2                                                        | -3,21 | 0,48 | 1,24 |
| 209304_x_at  | 4616   | GADD45B  | growth arrest and DNA-damage-inducible, beta                                            | -3,21 | 0,42 | 1,24 |
| 235809_at    | 132660 | LIN54    | lin-54 homolog (C. elegans)                                                             | -3,21 | 0,46 | 1,24 |
| 226624_at    | 23132  | RAD54L2  | RAD54-like 2 (S. cerevisiae)                                                            | -3,21 | 0,43 | 1,24 |
| 219615_s_at  | 8645   | KCNK5    | potassium channel, subfamily K, member 5                                                | -3,20 | 0,35 | 1,24 |
| 233629_at    | 2309   | FOXO3    | forkhead box O3                                                                         | -3,20 | 0,54 | 1,24 |
| 205651_x_at  | 11069  | RAPGEF4  | Rap guanine nucleotide exchange factor (GEF) 4                                          | -3,20 | 0,45 | 1,24 |
| 201502_s_at  | 4792   | NFKBIA   | nuclear factor of kappa light polypeptide gene enhancer in B-cells inhibitor, alpha     | -3,20 | 0,54 | 1,24 |
| 203195_s_at  | 4928   | NUP98    | nucleoporin 98kDa                                                                       | -3,20 | 0,56 | 1,24 |
| 242618_at    | 7726   | TRIM26   | tripartite motif-containing 26                                                          | -3,20 | 0,41 | 1,24 |
| 212291_at    | 204851 | HIPK1    | homeodomain interacting protein kinase 1                                                | -3,20 | 0,41 | 1,24 |
| 233678_at    | 6938   | TCF12    | transcription factor 12 (HTF4, helix-loop-helix transcription factors 4)                | -3,19 | 0,53 | 1,24 |
| 226188_at    | 29094  | HSPC159  | galectin-related protein                                                                | -3,19 | 0,56 | 1,24 |
| 24374--_at   | --     | --       | --                                                                                      | -3,19 | 0,43 | 1,24 |
| 229695_at    | 9392   | TGFBRAP1 | transforming growth factor, beta receptor associated protein 1                          | -3,19 | 0,41 | 1,24 |
| 214140_at    | 8034   | SLC25A16 | solute carrier family 25 (mitochondrial carrier; Graves disease autoantigen), member 16 | -3,19 | 0,56 | 1,24 |
| 232366_at    | 9778   | KIAA0232 | KIAA0232 gene product                                                                   | -3,19 | 0,47 | 1,24 |
| 231067_s_at  | 9590   | AKAP12   | A kinase (PRKA) anchor protein (gravin) 12                                              | -3,19 | 0,49 | 1,24 |



|             |        |          |                                                                           |       |      |      |
|-------------|--------|----------|---------------------------------------------------------------------------|-------|------|------|
| 218532_s_at | 54463  | FAM134B  | family with sequence similarity 134, member B                             | -3,18 | 0,50 | 1,24 |
| 1553550_at  | 317705 | VN1R5    | vomeronal 1 receptor 5                                                    | -3,18 | 0,41 | 1,24 |
| 217682_at   | 29035  | C16orf72 | chromosome 16 open reading frame 72                                       | -3,17 | 0,47 | 1,24 |
| 242181_at   | 57552  | AADACL1  | arylacetamide deacetylase-like 1                                          | -3,17 | 0,52 | 1,24 |
| 205121_at   | 6443   | SGCB     | sarcoglycan, beta (43kDa dystrophin-associated glycoprotein)              | -3,17 | 0,56 | 1,24 |
| 236368_at   | --     | --       | --                                                                        | -3,17 | 0,48 | 1,24 |
| 226478_at   | --     | --       | --                                                                        | -3,17 | 0,53 | 1,24 |
| 203823_at   | 5998   | RGS3     | regulator of G-protein signalling 3                                       | -3,16 | 0,43 | 1,24 |
| 227704_at   | 83636  | C19orf12 | chromosome 19 open reading frame 12                                       | -3,16 | 0,38 | 1,24 |
| 205192_at   | 9020   | MAP3K14  | mitogen-activated protein kinase kinase kinase 14                         | -3,16 | 0,41 | 1,24 |
| 206582_s_at | 9289   | GPR56    | G protein-coupled receptor 56                                             | -3,16 | 0,35 | 1,24 |
| 242074_at   | 23760  | PITPNB   | phosphatidylinositol transfer protein, beta                               | -3,15 | 0,45 | 1,24 |
| 236023_at   | 1025   | CDK9     | cyclin-dependent kinase 9 (CDC2-related kinase)                           | -3,15 | 0,49 | 1,24 |
| 226911_at   | 133584 | EGFLAM   | EGF-like, fibronectin type III and laminin G domains                      | -3,15 | 0,35 | 1,24 |
| 1555827_at  | 57018  | CCNL1    | cyclin L1                                                                 | -3,15 | 0,42 | 1,24 |
| 224537_at   | 56097  | PCDHGC5  | protocadherin gamma subfamily C, 5                                        | -3,15 | 0,44 | 1,24 |
| 218319_at   | 57162  | PELI1    | pellino homolog 1 (Drosophila)                                            | -3,15 | 0,52 | 1,24 |
| 36829_at    | 5187   | PER1     | period homolog 1 (Drosophila)                                             | -3,14 | 0,46 | 1,24 |
| 212817_at   | 25822  | DNAJB5   | DnaJ (Hsp40) homolog, subfamily B, member 5                               | -3,14 | 0,43 | 1,24 |
| 228754_at   | 6533   | SLC6A6   | solute carrier family 6 (neurotransmitter transporter, taurine), member 6 | -3,14 | 0,55 | 1,49 |
| 237439_at   | 124739 | USP43    | ubiquitin specific peptidase 43                                           | -3,14 | 0,38 | 1,49 |
| 218810_at   | 80149  | ZC3H12A  | zinc finger CCCH-type containing 12A                                      | -3,14 | 0,47 | 1,49 |
| 235110_at   | 11145  | HRASLS3  | HRAS-like suppressor 3                                                    | -3,14 | 0,56 | 1,49 |
| 203627_at   | 3480   | IGF1R    | insulin-like growth factor 1 receptor                                     | -3,14 | 0,44 | 1,49 |
| 1554825_at  | --     | --       | --                                                                        | -3,14 | 0,45 | 1,49 |
| 222652_s_at | 84656  | N-PAC    | cytokine-like nuclear factor n-pac                                        | -3,13 | 0,47 | 1,49 |
| 1566968_at  | 81848  | SPRY4    | sprouty homolog 4 (Drosophila)                                            | -3,13 | 0,39 | 1,49 |

|             |       |           |                                                                                                 |       |      |      |
|-------------|-------|-----------|-------------------------------------------------------------------------------------------------|-------|------|------|
| 231643_s_at | 80790 | CMIP      | c-Maf-inducing protein                                                                          | -3,13 | 0,40 | 1,49 |
| 210631_at   | 4763  | NF1       | neurofibromin 1 (neurofibromatosis, von Recklinghausen disease, Watson disease)                 | -3,13 | 0,47 | 1,49 |
| 212196_at   | --    | --        | --                                                                                              | -3,13 | 0,51 | 1,49 |
| 242627_at   | 56902 | PNO1      | partner of NOB1 homolog ( <i>S. cerevisiae</i> )                                                | -3,12 | 0,48 | 1,49 |
| 215322_at   | --    | --        | --                                                                                              | -3,12 | 0,41 | 1,49 |
| 223079_s_at | 2744  | GLS       | glutaminase                                                                                     | -3,12 | 0,48 | 1,49 |
| 201631_s_at | 8870  | IER3      | immediate early response 3                                                                      | -3,11 | 0,45 | 1,49 |
| 203372_s_at | 8835  | SOCS2     | suppressor of cytokine signaling 2                                                              | -3,11 | 0,44 | 1,49 |
| 206626_x_at | 6756  | SSX1      | synovial sarcoma, X breakpoint 1                                                                | -3,11 | 0,48 | 1,49 |
| 219474_at   | 79669 | C3orf52   | chromosome 3 open reading frame 52                                                              | -3,11 | 0,39 | 1,49 |
| 227345_at   | 8793  | TNFRSF10D | tumor necrosis factor receptor superfamily, member 10d, decoy with truncated death domain       | -3,11 | 0,45 | 1,49 |
| 215756_at   | --    | --        | --                                                                                              | -3,11 | 0,53 | 1,49 |
| 231990_at   | 9958  | USP15     | ubiquitin specific peptidase 15                                                                 | -3,11 | 0,49 | 1,49 |
| 23---48_at  | --    | --        | --                                                                                              | -3,11 | 0,44 | 1,49 |
| 216152_at   | 23024 | PDZRN3    | PDZ domain containing RING finger 3                                                             | -3,11 | 0,50 | 1,49 |
| 217833_at   | 10492 | SYNCRIP   | synaptotagmin binding, cytoplasmic RNA interacting protein                                      | -3,10 | 0,56 | 1,49 |
| 226898_s_at | 6421  | SFPQ      | splicing factor proline/glutamine-rich (polypyrimidine tract binding protein associated)        | -3,10 | 0,57 | 1,49 |
| 210854_x_at | 6535  | SLC6A8    | solute carrier family 6 (neurotransmitter transporter, creatine), member 8                      | -3,10 | 0,49 | 1,49 |
| 229428_at   | 8505  | PARG      | poly (ADP-ribose) glycohydrolase                                                                | -3,10 | 0,48 | 1,49 |
| 244731_at   | 4129  | MAOB      | monoamine oxidase B                                                                             | -3,10 | 0,54 | 1,49 |
| 216061_x_at | 5155  | PDGFB     | platelet-derived growth factor beta polypeptide (simian sarcoma viral (v-sis) oncogene homolog) | -3,10 | 0,44 | 1,49 |
| 206115_at   | 1960  | EGR3      | early growth response 3                                                                         | -3,09 | 0,32 | 1,49 |
| 228976_at   | 23308 | ICOSLG    | inducible T-cell co-stimulator ligand                                                           | -3,09 | 0,46 | 1,49 |
| 237197_at   | 93273 | LEMD1     | LEM domain containing 1                                                                         | -3,08 | 0,50 | 1,49 |
| 241824_at   | 2355  | FOSL2     | FOS-like antigen 2                                                                              | -3,08 | 0,37 | 1,49 |

|                  |                   |                      |                                                                                                                                            |       |      |      |
|------------------|-------------------|----------------------|--------------------------------------------------------------------------------------------------------------------------------------------|-------|------|------|
| 238523_at        | 79786             | C16orf44             | chromosome 16 open reading frame 44                                                                                                        | -3,08 | 0,54 | 1,49 |
| 243619_at        | 26127             | FGFR1OP2             | FGFR1 oncogene partner 2                                                                                                                   | -3,08 | 0,44 | 1,49 |
| 1556554_at       | 135892            | TRIM50               | tripartite motif-containing 50                                                                                                             | -3,08 | 0,42 | 1,49 |
| 15625--5_at      | --                | --                   | --                                                                                                                                         | -3,08 | 0,58 | 1,49 |
| 242473_at        | 9618              | TRAF4                | TNF receptor-associated factor 4                                                                                                           | -3,08 | 0,51 | 1,49 |
| 211985_s_at      | 801               | CALM1                | calmodulin 1 (phosphorylase kinase, delta)                                                                                                 | -3,08 | 0,54 | 1,49 |
| 202936_s_at      | 6662              | SOX9                 | SRY (sex determining region Y)-box 9 (campomelic dysplasia, autosomal sex-reversal)                                                        | -3,08 | 0,42 | 1,49 |
| 204495_s_at      | 56905             | C15orf39             | chromosome 15 open reading frame 39                                                                                                        | -3,07 | 0,45 | 1,49 |
| 204255_s_at      | 7421              | VDR                  | vitamin D (1,25- dihydroxyvitamin D3) receptor                                                                                             | -3,07 | 0,46 | 1,49 |
| 215423_at        | --                | --                   | --                                                                                                                                         | -3,07 | 0,46 | 1,49 |
| 222088_s_at      | 144195//<br>/6515 | SLC2A14///SL<br>C2A3 | solute carrier family 2 (facilitated glucose transporter), member 14///solute carrier family 2 (facilitated glucose transporter), member 3 | -3,07 | 0,39 | 1,49 |
| 220680_at        | 55225             | RAVER2               | ribonucleoprotein, PTB-binding 2                                                                                                           | -3,06 | 0,43 | 1,49 |
| 1561886_a_a<br>t | --                | --                   | --                                                                                                                                         | -3,06 | 0,44 | 1,49 |
| 207630_s_at      | 1390              | CREM                 | cAMP responsive element modulator                                                                                                          | -3,06 | 0,44 | 1,49 |
| 212099_at        | 388               | RHOB                 | ras homolog gene family, member B                                                                                                          | -3,06 | 0,52 | 1,49 |
| 231459_at        | --                | --                   | --                                                                                                                                         | -3,06 | 0,53 | 1,49 |
| 205633_s_at      | 211               | ALAS1                | aminolevulinate, delta-, synthase 1                                                                                                        | -3,06 | 0,55 | 1,49 |
| 242736_at        | 10580             | SORBS1               | sorbin and SH3 domain containing 1                                                                                                         | -3,06 | 0,46 | 1,49 |
| 214829_at        | 10157             | AASS                 | aminoadipate-semialdehyde synthase                                                                                                         | -3,06 | 0,50 | 1,49 |
| 231270_at        | 377677            | CA13                 | carbonic anhydrase XIII                                                                                                                    | -3,06 | 0,49 | 1,49 |
| 226268_at        | 23011             | RAB21                | RAB21, member RAS oncogene family                                                                                                          | -3,06 | 0,54 | 1,49 |
| 207211_at        | 9099              | USP2                 | ubiquitin specific peptidase 2                                                                                                             | -3,05 | 0,40 | 1,87 |
| 201147_s_at      | 7078              | TIMP3                | TIMP metalloproteinase inhibitor 3 (Sorsby fundus dystrophy, pseudoinflammatory)                                                           | -3,05 | 0,48 | 1,87 |
| 228629_s_at      | --                | --                   | --                                                                                                                                         | -3,05 | 0,40 | 1,87 |
| 230082_at        | 9209              | LRRFIP2              | leucine rich repeat (in FLII) interacting protein 2                                                                                        | -3,05 | 0,57 | 1,87 |
| 204601_at        | 9683              | N4BP1                | Nedd4 binding protein 1                                                                                                                    | -3,05 | 0,40 | 1,87 |

|              |                    |                    |                                                                                         |       |      |      |
|--------------|--------------------|--------------------|-----------------------------------------------------------------------------------------|-------|------|------|
| 24--41--_at  | --                 | --                 | --                                                                                      | -3,05 | 0,39 | 1,87 |
| 209193_at    | 5292               | PIM1               | pim-1 oncogene                                                                          | -3,04 | 0,43 | 1,87 |
| 239964_at    | 27004              | TCL6               | T-cell leukemia/lymphoma 6                                                              | -3,04 | 0,39 | 1,87 |
| 219181_at    | 9388               | LIPG               | lipase, endothelial                                                                     | -3,04 | 0,38 | 1,87 |
| 239794_at    | 3376               | IARS               | isoleucyl-tRNA synthetase                                                               | -3,04 | 0,48 | 1,87 |
| 226589_at    | 201931             | FLJ38482           | hypothetical protein FLJ38482                                                           | -3,04 | 0,43 | 1,87 |
| 227554_at    | --                 | --                 | --                                                                                      | -3,04 | 0,45 | 1,87 |
| 227991_x_at  | 23099              | ZBTB43             | zinc finger and BTB domain containing 43                                                | -3,04 | 0,53 | 1,87 |
| 231262_at    | --                 | --                 | --                                                                                      | -3,04 | 0,38 | 1,87 |
| 209910_at    | 8034               | SLC25A16           | solute carrier family 25 (mitochondrial carrier; Graves disease autoantigen), member 16 | -3,04 | 0,47 | 1,87 |
| 208504_x_at  | 56125              | PCDHB11            | protocadherin beta 11                                                                   | -3,04 | 0,45 | 1,87 |
| 224868_at    | 25921              | ZDHHC5             | zinc finger, DHHC-type containing 5                                                     | -3,03 | 0,46 | 1,87 |
| 236439_at    | 604                | BCL6               | B-cell CLL/lymphoma 6 (zinc finger protein 51)                                          | -3,03 | 0,47 | 1,87 |
| 206791_s_at  | 5143               | PDE4C              | phosphodiesterase 4C, cAMP-specific (phosphodiesterase E1 dunce homolog, Drosophila)    | -3,03 | 0,44 | 1,87 |
| 229958_at    | --                 | --                 | --                                                                                      | -3,03 | 0,50 | 1,87 |
| 1559469_s_at | 57568              | SIPA1L2            | signal-induced proliferation-associated 1 like 2                                        | -3,03 | 0,49 | 1,87 |
| 220990_s_at  | 406991//<br>/81671 | MIRN21//TM<br>EM49 | microRNA 21//transmembrane protein 49                                                   | -3,03 | 0,52 | 1,87 |
| 230251_at    | 90632              | C6orf176           | chromosome 6 open reading frame 176                                                     | -3,02 | 0,37 | 1,87 |
| 213472_at    | 3187               | HNRPH1             | heterogeneous nuclear ribonucleoprotein H1 (H)                                          | -3,02 | 0,50 | 1,87 |
| 213221_s_at  | 23235              | SNF1LK2            | SNF1-like kinase 2                                                                      | -3,02 | 0,57 | 1,87 |
| 202063_s_at  | 6400               | SEL1L              | sel-1 suppressor of lin-12-like (C. elegans)                                            | -3,02 | 0,47 | 1,87 |
| 221944_at    | 5170               | PDPK1              | 3-phosphoinositide dependent protein kinase-1                                           | -3,02 | 0,51 | 1,87 |
| 215498_s_at  | 5606               | MAP2K3             | mitogen-activated protein kinase kinase 3                                               | -3,02 | 0,53 | 1,87 |
| 231121_at    | 84343              | HPS3               | Hermansky-Pudlak syndrome 3                                                             | -3,02 | 0,48 | 1,87 |
| 207886_s_at  | 799                | CALCR              | calcitonin receptor                                                                     | -3,02 | 0,35 | 1,87 |
| 224654_at    | 169270//<br>/9188  | ZNF596///DDX<br>21 | zinc finger protein 596///DEAD (Asp-Glu-Ala-Asp) box polypeptide 21                     | -3,01 | 0,61 | 1,87 |

|              |        |           |                                                                                |       |      |      |
|--------------|--------|-----------|--------------------------------------------------------------------------------|-------|------|------|
| 1557521_a_at | --     | --        | --                                                                             | -3,01 | 0,52 | 1,87 |
| 225750_at    | 30001  | ERO1L     | ERO1-like ( <i>S. cerevisiae</i> )                                             | -3,01 | 0,49 | 1,87 |
| 219371_s_at  | 10365  | KLF2      | Kruppel-like factor 2 (lung)                                                   | -3,01 | 0,52 | 1,87 |
| 226460_at    | 57600  | KIAA1450  | KIAA1450 protein                                                               | -3,01 | 0,55 | 1,87 |
| 1552690_a_at | 93589  | CACNA2D4  | calcium channel, voltage-dependent, alpha 2/delta subunit 4                    | -3,01 | 0,59 | 1,87 |
| 229714_at    | 266722 | HS6ST3    | heparan sulfate 6-O-sulfotransferase 3                                         | -3,01 | 0,42 | 1,87 |
| 2223--3_at   | --     | --        | --                                                                             | -3,01 | 0,41 | 1,87 |
| 228191_at    | --     | --        | --                                                                             | -3,01 | 0,50 | 1,87 |
| 232801_at    | 375748 | LOC375748 | RAD26L hypothetical protein                                                    | -3,01 | 0,52 | 1,87 |
| 205807_s_at  | 7286   | TUFT1     | tuftelin 1                                                                     | -3,01 | 0,54 | 1,87 |
| 224720_at    | 57534  | MIB1      | mindbomb homolog 1 ( <i>Drosophila</i> )                                       | -3,00 | 0,57 | 1,87 |
| 204595_s_at  | 6781   | STC1      | stanniocalcin 1                                                                | -3,00 | 0,36 | 1,87 |
| 207526_s_at  | 9173   | IL1RL1    | interleukin 1 receptor-like 1                                                  | -3,00 | 0,40 | 1,87 |
| 223080_at    | 2744   | GLS       | glutaminase                                                                    | -3,00 | 0,46 | 1,87 |
| 225204_at    | 160760 | PPTC7     | PTC7 protein phosphatase homolog ( <i>S. cerevisiae</i> )                      | -3,00 | 0,51 | 1,87 |
| 1562--56_at  | --     | --        | --                                                                             | -3,00 | 0,43 | 1,87 |
| 1555960_at   | 3094   | HINT1     | histidine triad nucleotide binding protein 1                                   | -2,99 | 0,50 | 1,87 |
| 218364_at    | 9209   | LRRFIP2   | leucine rich repeat (in FLII) interacting protein 2                            | -2,99 | 0,57 | 1,87 |
| 206566_at    | 6541   | SLC7A1    | solute carrier family 7 (cationic amino acid transporter, y+ system), member 1 | -2,99 | 0,49 | 1,87 |
| 202545_at    | 5580   | PRKCD     | protein kinase C, delta                                                        | -2,99 | 0,40 | 1,87 |
| 218099_at    | 55852  | TEX2      | testis expressed 2                                                             | -2,99 | 0,59 | 1,87 |
| 231214_at    | --     | --        | --                                                                             | -2,99 | 0,45 | 1,87 |
| 228587_at    | 125206 | SLC5A10   | solute carrier family 5 (sodium/glucose cotransporter), member 10              | -2,99 | 0,46 | 1,87 |
| 207798_s_at  | 11273  | ATXN2L    | ataxin 2-like                                                                  | -2,99 | 0,50 | 1,87 |
| 229506_at    | 151742 | PPM1L     | protein phosphatase 1 (formerly 2C)-like                                       | -2,98 | 0,55 | 1,87 |
| 201208_s_at  | 7126   | TNFAIP1   | tumor necrosis factor, alpha-induced protein 1 (endothelial)                   | -2,98 | 0,44 | 1,87 |
| 223093_at    | 56172  | ANKH      | ankylosis, progressive homolog (mouse)                                         | -2,98 | 0,58 | 1,87 |

|              |        |           |                                                                                                                     |       |      |      |
|--------------|--------|-----------|---------------------------------------------------------------------------------------------------------------------|-------|------|------|
| 1554414_a_at | 734    | OSGIN2    | oxidative stress induced growth inhibitor family member 2                                                           | -2,98 | 0,50 | 1,87 |
| 225146_at    | 203259 | C9orf25   | chromosome 9 open reading frame 25                                                                                  | -2,98 | 0,34 | 1,87 |
| 223225_s_at  | 81929  | SEH1L     | SEH1-like ( <i>S. cerevisiae</i> )                                                                                  | -2,98 | 0,50 | 1,87 |
| 1552928_s_at | 257397 | MAP3K7IP3 | mitogen-activated protein kinase kinase kinase 7 interacting protein 3                                              | -2,98 | 0,39 | 1,87 |
| 1557705_a_at | 5130   | PCYT1A    | phosphate cytidyltransferase 1, choline, alpha                                                                      | -2,98 | 0,44 | 1,87 |
| 229660_at    | 124045 | C16orf55  | chromosome 16 open reading frame 55                                                                                 | -2,98 | 0,46 | 1,87 |
| 215707_s_at  | 5621   | PRNP      | prion protein (p27-30) (Creutzfeldt-Jakob disease, Gerstmann-Strausler-Scheinker syndrome, fatal familial insomnia) | -2,98 | 0,46 | 1,87 |
| 210716_s_at  | 6249   | CLIP1     | CAP-GLY domain containing linker protein 1                                                                          | -2,97 | 0,40 | 1,87 |
| 213310_at    | 27161  | EIF2C2    | eukaryotic translation initiation factor 2C, 2                                                                      | -2,97 | 0,52 | 1,87 |
| 202081_at    | 9592   | IER2      | immediate early response 2                                                                                          | -2,97 | 0,56 | 1,87 |
| 228980_at    | 117584 | RFFL      | ring finger and FYVE-like domain containing 1                                                                       | -2,97 | 0,60 | 1,87 |
| 223027_at    | 51429  | SNX9      | sorting nexin 9                                                                                                     | -2,97 | 0,54 | 1,87 |
| 1552897_a_at | 170850 | KCNG3     | potassium voltage-gated channel, subfamily G, member 3                                                              | -2,97 | 0,37 | 2,20 |
| 232000_at    | 158219 | C9orf52   | chromosome 9 open reading frame 52                                                                                  | -2,97 | 0,52 | 2,20 |
| 226882_x_at  | 10785  | WDR4      | WD repeat domain 4                                                                                                  | -2,97 | 0,50 | 2,20 |
| 226370_at    | 80311  | KLHL15    | kelch-like 15 ( <i>Drosophila</i> )                                                                                 | -2,96 | 0,58 | 2,20 |
| 204693_at    | 11135  | CDC42EP1  | CDC42 effector protein (Rho GTPase binding) 1                                                                       | -2,96 | 0,47 | 2,20 |
| 212230_at    | 8613   | PPAP2B    | phosphatidic acid phosphatase type 2B                                                                               | -2,96 | 0,59 | 2,20 |
| 202129_s_at  | 8780   | RIOK3     | RIO kinase 3 (yeast)                                                                                                | -2,96 | 0,61 | 2,20 |
| 224992_s_at  | 80790  | CMIP      | c-Maf-inducing protein                                                                                              | -2,96 | 0,41 | 2,20 |
| 224793_s_at  | 7046   | TGFBR1    | transforming growth factor, beta receptor I (activin A receptor type II-like kinase, 53kDa)                         | -2,96 | 0,61 | 2,20 |
| 227530_at    | 9590   | AKAP12    | A kinase (PRKA) anchor protein (gravin) 12                                                                          | -2,96 | 0,53 | 2,20 |
| 23--3---_at  | --     | --        | --                                                                                                                  | -2,96 | 0,61 | 2,20 |
| 219500_at    | 23529  | CLCF1     | cardiotrophin-like cytokine factor 1                                                                                | -2,96 | 0,48 | 2,20 |
| 213900_at    | 9413   | C9orf61   | chromosome 9 open reading frame 61                                                                                  | -2,95 | 0,54 | 2,20 |

|              |        |           |                                                                                                          |       |      |      |
|--------------|--------|-----------|----------------------------------------------------------------------------------------------------------|-------|------|------|
| 215241_at    | 63982  | TMEM16C   | transmembrane protein 16C                                                                                | -2,95 | 0,50 | 2,20 |
| 204799_at    | 9889   | ZBED4     | zinc finger, BED-type containing 4                                                                       | -2,95 | 0,50 | 2,20 |
| 226863_at    | --     | --        | --                                                                                                       | -2,95 | 0,44 | 2,20 |
| 210194_at    | 22925  | PLA2R1    | phospholipase A2 receptor 1, 180kDa                                                                      | -2,95 | 0,40 | 2,20 |
| 213549_at    | 6571   | SLC18A2   | solute carrier family 18 (vesicular monoamine), member 2                                                 | -2,95 | 0,55 | 2,20 |
| 215253_s_at  | 1827   | RCAN1     | regulator of calcineurin 1                                                                               | -2,94 | 0,46 | 2,20 |
| 212978_at    | 400761 | FLJ27354  | hypothetical gene supported by AK130864                                                                  | -2,94 | 0,55 | 2,20 |
| 225516_at    | 6542   | SLC7A2    | solute carrier family 7 (cationic amino acid transporter, y+ system), member 2                           | -2,94 | 0,51 | 2,20 |
| 223430_at    | 23235  | SNF1LK2   | SNF1-like kinase 2                                                                                       | -2,94 | 0,46 | 2,20 |
| 201751_at    | 9929   | JOSD1     | Josephin domain containing 1                                                                             | -2,94 | 0,48 | 2,20 |
| 213793_s_at  | 9456   | HOMER1    | homer homolog 1 (Drosophila)                                                                             | -2,94 | 0,42 | 2,20 |
| 65588_at     | 388796 | LOC388796 | hypothetical LOC388796                                                                                   | -2,94 | 0,59 | 2,20 |
| 1569464_at   | 8496   | PPFIBP1   | PTPRF interacting protein, binding protein 1 (liprin beta 1)                                             | -2,94 | 0,44 | 2,20 |
| 212110_at    | 23516  | SLC39A14  | solute carrier family 39 (zinc transporter), member 14                                                   | -2,93 | 0,48 | 2,20 |
| 235566_at    | --     | --        | --                                                                                                       | -2,93 | 0,64 | 2,20 |
| 232164_s_at  | 83481  | EPPK1     | epiplakin 1                                                                                              | -2,93 | 0,53 | 2,20 |
| 211507_s_at  | 8897   | MTMR3     | myotubularin related protein 3                                                                           | -2,93 | 0,50 | 2,20 |
| 237624_at    | 1284   | COL4A2    | collagen, type IV, alpha 2                                                                               | -2,93 | 0,54 | 2,20 |
| 202392_s_at  | 23761  | PISD      | phosphatidylserine decarboxylase                                                                         | -2,92 | 0,55 | 2,20 |
| 203149_at    | 5819   | PVRL2     | poliovirus receptor-related 2 (herpesvirus entry mediator B)                                             | -2,92 | 0,52 | 2,20 |
| 213120_at    | 23074  | KIAA0701  | KIAA0701 protein                                                                                         | -2,92 | 0,48 | 2,20 |
| 239557_at    | 9209   | LRRFIP2   | leucine rich repeat (in FLII) interacting protein 2                                                      | -2,92 | 0,43 | 2,20 |
| 232809_s_at  | 2321   | FLT1      | fms-related tyrosine kinase 1 (vascular endothelial growth factor/vascular permeability factor receptor) | -2,92 | 0,51 | 2,20 |
| 1567222_x_at | 60481  | ELOVL5    | ELOVL family member 5, elongation of long chain fatty acids (FEN1/Elo2, SUR4/Elo3-like, yeast)           | -2,92 | 0,53 | 2,20 |

|             |        |          |                                                                           |       |      |      |
|-------------|--------|----------|---------------------------------------------------------------------------|-------|------|------|
| 155578_at   | 5797   | PTPRM    | protein tyrosine phosphatase, receptor type, M                            | -2,92 | 0,55 | 2,20 |
| 212514_x_at | 1654   | DDX3X    | DEAD (Asp-Glu-Ala-Asp) box polypeptide 3, X-linked                        | -2,92 | 0,55 | 2,20 |
| 233753_at   | 57466  | SFRS15   | splicing factor, arginine/serine-rich 15                                  | -2,92 | 0,50 | 2,20 |
| 208814_at   | 3308   | HSPA4    | heat shock 70kDa protein 4                                                | -2,92 | 0,62 | 2,20 |
| 211016_x_at | 3308   | HSPA4    | heat shock 70kDa protein 4                                                | -2,92 | 0,55 | 2,20 |
| 219230_at   | 55273  | TMEM100  | transmembrane protein 100                                                 | -2,92 | 0,38 | 2,20 |
| 243403_x_at | 1368   | CPM      | carboxypeptidase M                                                        | -2,91 | 0,43 | 2,20 |
| 239472_at   | 30844  | EHD4     | EH-domain containing 4                                                    | -2,91 | 0,50 | 2,20 |
| 201811_x_at | 9467   | SH3BP5   | SH3-domain binding protein 5 (BTK-associated)                             | -2,91 | 0,51 | 2,20 |
| 218122_s_at | 59343  | SEN2     | SUMO1/sentrin/SMT3 specific peptidase 2                                   | -2,91 | 0,53 | 2,20 |
| 210827_s_at | 1999   | ELF3     | E74-like factor 3 (ets domain transcription factor, epithelial-specific ) | -2,91 | 0,50 | 2,20 |
| 224958_at   | 57532  | NUFIP2   | nuclear fragile X mental retardation protein interacting protein 2        | -2,91 | 0,52 | 2,20 |
| 1553644_at  | 161176 | C14orf49 | chromosome 14 open reading frame 49                                       | -2,91 | 0,59 | 2,20 |
| 203499_at   | 1969   | EPHA2    | EPH receptor A2                                                           | -2,91 | 0,45 | 2,20 |
| 202147_s_at | 3475   | IFRD1    | interferon-related developmental regulator 1                              | -2,91 | 0,46 | 2,20 |
| 1562966_at  | 56243  | KIAA1217 | KIAA1217                                                                  | -2,91 | 0,59 | 2,20 |
| 238482_at   | 8609   | KLF7     | Kruppel-like factor 7 (ubiquitous)                                        | -2,91 | 0,61 | 2,20 |
| 235573_at   | 10808  | HSPH1    | heat shock 105kDa/110kDa protein 1                                        | -2,91 | 0,54 | 2,20 |
| 226038_at   | 91694  | LONRF1   | LON peptidase N-terminal domain and ring finger 1                         | -2,90 | 0,53 | 2,20 |
| 228386_s_at | 83479  | DDX59    | DEAD (Asp-Glu-Ala-Asp) box polypeptide 59                                 | -2,90 | 0,57 | 2,20 |
| 226615_at   | 9213   | XPR1     | xenotropic and polytropic retrovirus receptor                             | -2,90 | 0,47 | 2,20 |
| 213933_at   | 5733   | PTGER3   | prostaglandin E receptor 3 (subtype EP3)                                  | -2,90 | 0,52 | 2,20 |
| 211610_at   | 1316   | KLF6     | Kruppel-like factor 6                                                     | -2,90 | 0,50 | 2,20 |
| 206290_s_at | 6000   | RGS7     | regulator of G-protein signalling 7                                       | -2,90 | 0,42 | 2,20 |
| 210408_s_at | 9362   | CPNE6    | copine VI (neuronal)                                                      | -2,90 | 0,49 | 2,20 |
| 229549_at   | 611    | OPN1SW   | opsin 1 (cone pigments), short-wave-sensitive (color blindness, tritan)   | -2,90 | 0,48 | 2,20 |
| 215037_s_at | 598    | BCL2L1   | BCL2-like 1                                                               | -2,90 | 0,54 | 2,20 |



|              |        |           |                                                                              |       |      |      |
|--------------|--------|-----------|------------------------------------------------------------------------------|-------|------|------|
| 209218_at    | 6713   | SQLE      | squalene epoxidase                                                           | -2,90 | 0,47 | 2,20 |
| 202679_at    | 4864   | NPC1      | Niemann-Pick disease, type C1                                                | -2,90 | 0,56 | 2,20 |
| 1555427_s_at | 10492  | SYNCRIP   | synaptotagmin binding, cytoplasmic RNA interacting protein                   | -2,90 | 0,56 | 2,20 |
| 207550_at    | 4352   | MPL       | myeloproliferative leukemia virus oncogene                                   | -2,89 | 0,53 | 2,20 |
| 225835_at    | 6558   | SLC12A2   | solute carrier family 12 (sodium/potassium/chloride transporters), member 2  | -2,89 | 0,55 | 2,20 |
| 201925_s_at  | 1604   | CD55      | CD55 molecule, decay accelerating factor for complement (Cromer blood group) | -2,89 | 0,54 | 2,20 |
| 229832_x_at  | 54436  | SH3TC1    | SH3 domain and tetratricopeptide repeats 1                                   | -2,89 | 0,52 | 2,20 |
| 1569433_at   | 389432 | SAMD5     | sterile alpha motif domain containing 5                                      | -2,89 | 0,55 | 2,20 |
| 214905_at    | 145899 | LOC145899 | hypothetical protein LOC145899                                               | -2,89 | 0,46 | 2,20 |
| 212324_s_at  | 55187  | VPS13D    | vacuolar protein sorting 13 homolog D ( <i>S. cerevisiae</i> )               | -2,89 | 0,53 | 2,20 |
| 207332_s_at  | 7037   | TFRC      | transferrin receptor (p90, CD71)                                             | -2,89 | 0,49 | 2,20 |
| 225972_at    | 169200 | TMEM64    | transmembrane protein 64                                                     | -2,89 | 0,58 | 2,20 |
| 23331--_at   | --     | --        | --                                                                           | -2,89 | 0,41 | 2,20 |
| 227083_at    | 145173 | B3GALTL   | beta 1,3-galactosyltransferase-like                                          | -2,89 | 0,52 | 2,20 |
| 209874_x_at  | 54805  | CNNM2     | cyclin M2                                                                    | -2,89 | 0,48 | 2,20 |
| 220773_s_at  | 10243  | GPHN      | gephyrin                                                                     | -2,89 | 0,55 | 2,20 |
| 213591_at    | 501    | ALDH7A1   | aldehyde dehydrogenase 7 family, member A1                                   | -2,88 | 0,60 | 2,20 |
| 202393_s_at  | 7071   | KLF10     | Kruppel-like factor 10                                                       | -2,88 | 0,58 | 2,38 |
| 235638_at    | 166824 | RASSF6    | Ras association (RalGDS/AF-6) domain family 6                                | -2,88 | 0,54 | 2,38 |
| 228632_at    | --     | --        | --                                                                           | -2,88 | 0,45 | 2,38 |
| 203293_s_at  | 3998   | LMAN1     | lectin, mannose-binding, 1                                                   | -2,88 | 0,48 | 2,38 |
| 223377_x_at  | 1154   | CISH      | cytokine inducible SH2-containing protein                                    | -2,88 | 0,43 | 2,38 |
| 237143_at    | --     | --        | --                                                                           | -2,88 | 0,48 | 2,38 |
| 212900_at    | 10802  | SEC24A    | SEC24 related gene family, member A ( <i>S. cerevisiae</i> )                 | -2,88 | 0,61 | 2,38 |
| 226853_at    | 55589  | BMP2K     | BMP2 inducible kinase                                                        | -2,88 | 0,64 | 2,38 |
| 212895_s_at  | 29     | ABR       | active BCR-related gene                                                      | -2,88 | 0,57 | 2,38 |

|              |        |          |                                                                           |       |      |      |
|--------------|--------|----------|---------------------------------------------------------------------------|-------|------|------|
| 219897_at    | 79845  | RNF122   | ring finger protein 122                                                   | -2,88 | 0,54 | 2,38 |
| 223199_at    | 2872   | MKNK2    | MAP kinase interacting serine/threonine kinase 2                          | -2,88 | 0,49 | 2,38 |
| 232746_at    | --     | --       | --                                                                        | -2,88 | 0,45 | 2,38 |
| 203348_s_at  | 2119   | ETV5     | ets variant gene 5 (ets-related molecule)                                 | -2,87 | 0,41 | 2,38 |
| 213358_at    | 23255  | KIAA0802 | KIAA0802                                                                  | -2,87 | 0,54 | 2,38 |
| 239978_at    | 23760  | PITPNB   | phosphatidylinositol transfer protein, beta                               | -2,87 | 0,50 | 2,38 |
| 2374--8_at   | --     | --       | --                                                                        | -2,87 | 0,59 | 2,38 |
| 223005_s_at  | 23731  | C9orf5   | chromosome 9 open reading frame 5                                         | -2,87 | 0,55 | 2,38 |
| 203853_s_at  | 9846   | GAB2     | GRB2-associated binding protein 2                                         | -2,87 | 0,50 | 2,38 |
| 214445_at    | 22936  | ELL2     | elongation factor, RNA polymerase II, 2                                   | -2,87 | 0,51 | 2,38 |
| 204181_s_at  | 23099  | ZBTB43   | zinc finger and BTB domain containing 43                                  | -2,87 | 0,50 | 2,38 |
| 2435--2_at   | --     | --       | --                                                                        | -2,86 | 0,54 | 2,38 |
| 242275_at    | --     | --       | --                                                                        | -2,86 | 0,47 | 2,38 |
| 240175_at    | 8645   | KCNK5    | potassium channel, subfamily K, member 5                                  | -2,86 | 0,45 | 2,38 |
| 239637_at    | --     | --       | --                                                                        | -2,86 | 0,55 | 2,38 |
| 205921_s_at  | 6533   | SLC6A6   | solute carrier family 6 (neurotransmitter transporter, taurine), member 6 | -2,86 | 0,51 | 2,38 |
| 225673_at    | 91663  | MYADM    | myeloid-associated differentiation marker                                 | -2,86 | 0,50 | 2,38 |
| 203199_s_at  | 4552   | MTRR     | 5-methyltetrahydrofolate-homocysteine methyltransferase reductase         | -2,86 | 0,50 | 2,38 |
| 235195_at    | 26190  | FBXW2    | F-box and WD repeat domain containing 2                                   | -2,86 | 0,56 | 2,38 |
| 219103_at    | 55616  | DDEFL1   | development and differentiation enhancing factor-like 1                   | -2,85 | 0,57 | 2,38 |
| 205833_s_at  | 25859  | PART1    | prostate androgen-regulated transcript 1                                  | -2,85 | 0,51 | 2,38 |
| 202498_s_at  | 6515   | SLC2A3   | solute carrier family 2 (facilitated glucose transporter), member 3       | -2,85 | 0,45 | 2,38 |
| 244627_at    | --     | --       | --                                                                        | -2,85 | 0,46 | 2,38 |
| 232449_at    | 83875  | BCDO2    | beta-carotene dioxygenase 2                                               | -2,85 | 0,52 | 2,38 |
| 209672_s_at  | 54468  | FLJ20323 | hypothetical protein FLJ20323                                             | -2,85 | 0,50 | 2,38 |
| 243675_at    | --     | --       | --                                                                        | -2,85 | 0,49 | 2,38 |
| 213---3_s_at | --     | --       | --                                                                        | -2,85 | 0,48 | 2,38 |
| 206020_at    | 9306   | SOCS6    | suppressor of cytokine signaling 6                                        | -2,84 | 0,56 | 2,38 |
| 228330_at    | 221302 | C6orf113 | chromosome 6 open reading frame 113                                       | -2,84 | 0,54 | 2,38 |

|              |        |          |                                                                                                                  |       |      |      |
|--------------|--------|----------|------------------------------------------------------------------------------------------------------------------|-------|------|------|
| 220239_at    | 55975  | KLHL7    | kelch-like 7 (Drosophila)                                                                                        | -2,84 | 0,48 | 2,38 |
| 15584--2_at  | --     | --       | --                                                                                                               | -2,84 | 0,42 | 2,38 |
| 207121_s_at  | 5597   | MAPK6    | mitogen-activated protein kinase 6                                                                               | -2,84 | 0,65 | 2,38 |
| 213514_s_at  | 1729   | DIAPH1   | diaphanous homolog 1 (Drosophila)                                                                                | -2,84 | 0,56 | 2,38 |
| 242719_at    | --     | --       | --                                                                                                               | -2,84 | 0,43 | 2,38 |
| 1556321_a_at | --     | --       | --                                                                                                               | -2,84 | 0,52 | 2,38 |
| 207754_at    | 11228  | RASSF8   | Ras association (RalGDS/AF-6) domain family 8                                                                    | -2,83 | 0,50 | 2,38 |
| 209186_at    | 488    | ATP2A2   | ATPase, Ca++ transporting, cardiac muscle, slow twitch 2                                                         | -2,83 | 0,55 | 2,38 |
| 233903_s_at  | 26084  | SGEF     | Src homology 3 domain-containing guanine nucleotide exchange factor                                              | -2,83 | 0,45 | 2,38 |
| 220800_s_at  | 29766  | TMOD3    | tropomodulin 3 (ubiquitous)                                                                                      | -2,83 | 0,57 | 2,38 |
| 243141_at    | 166929 | SGMS2    | sphingomyelin synthase 2                                                                                         | -2,83 | 0,50 | 2,38 |
| 1569--52_at  | --     | --       | --                                                                                                               | -2,83 | 0,54 | 2,38 |
| 229861_at    | --     | --       | --                                                                                                               | -2,83 | 0,60 | 2,38 |
| 231--55_at   | --     | --       | --                                                                                                               | -2,83 | 0,59 | 2,38 |
| 223309_x_at  | 50640  | PNPLA8   | patatin-like phospholipase domain containing 8                                                                   | -2,83 | 0,57 | 2,38 |
| 206359_at    | 9021   | SOCS3    | suppressor of cytokine signaling 3                                                                               | -2,83 | 0,48 | 2,38 |
| 228010_at    | 5522   | PPP2R2C  | protein phosphatase 2 (formerly 2A), regulatory subunit B, gamma isoform                                         | -2,83 | 0,41 | 2,38 |
| 234725_s_at  | 10509  | SEMA4B   | sema domain, immunoglobulin domain (Ig), transmembrane domain (TM) and short cytoplasmic domain, (semaphorin) 4B | -2,82 | 0,50 | 2,38 |
| 206268_at    | 10637  | LEFTY1   | left-right determination factor 1                                                                                | -2,82 | 0,43 | 2,38 |
| 223852_s_at  | 83931  | STK40    | serine/threonine kinase 40                                                                                       | -2,82 | 0,48 | 2,38 |
| 226005_at    | 7326   | UBE2G1   | ubiquitin-conjugating enzyme E2G 1 (UBC7 homolog, yeast)                                                         | -2,82 | 0,51 | 2,38 |
| 243070_at    | 54891  | FLJ20309 | hypothetical protein FLJ20309                                                                                    | -2,82 | 0,47 | 2,38 |
| 244616_x_at  | 4193   | MDM2     | Mdm2, transformed 3T3 cell double minute 2, p53 binding protein (mouse)                                          | -2,82 | 0,53 | 2,38 |
| 1554716_s_at | 414926 | C15orf50 | chromosome 15 open reading frame 50                                                                              | -2,82 | 0,52 | 2,38 |

|             |        |          |                                                                                                                                                          |       |      |      |
|-------------|--------|----------|----------------------------------------------------------------------------------------------------------------------------------------------------------|-------|------|------|
| 201169_s_at | 8553   | BHLHB2   | basic helix-loop-helix domain containing, class B, 2                                                                                                     | -2,82 | 0,44 | 2,38 |
| 211544_s_at | 2692   | GHRHR    | growth hormone releasing hormone receptor                                                                                                                | -2,82 | 0,45 | 2,38 |
| 238941_at   | 135892 | TRIM50   | tripartite motif-containing 50                                                                                                                           | -2,82 | 0,43 | 2,38 |
| 235394_at   | 9373   | PLAA     | phospholipase A2-activating protein                                                                                                                      | -2,82 | 0,53 | 2,38 |
| 236599_at   | 5270   | SERPINE2 | serpin peptidase inhibitor, clade E (nexin, plasminogen activator inhibitor type 1), member 2                                                            | -2,82 | 0,46 | 2,38 |
| 236826_at   | 158219 | C9orf52  | chromosome 9 open reading frame 52                                                                                                                       | -2,82 | 0,44 | 2,38 |
| 244402_at   | 6519   | SLC3A1   | solute carrier family 3 (cystine, dibasic and neutral amino acid transporters, activator of cystine, dibasic and neutral amino acid transport), member 1 | -2,82 | 0,57 | 2,38 |
| 2--55--1_at | --     | --       | --                                                                                                                                                       | -2,82 | 0,51 | 2,38 |
| 37028_at    | 23645  | PPP1R15A | protein phosphatase 1, regulatory (inhibitor) subunit 15A                                                                                                | -2,81 | 0,48 | 2,38 |
| 215464_s_at | 30851  | TAX1BP3  | Tax1 (human T-cell leukemia virus type I) binding protein 3                                                                                              | -2,81 | 0,56 | 2,38 |
| 216114_at   | 51517  | NCKIPSD  | NCK interacting protein with SH3 domain                                                                                                                  | -2,81 | 0,49 | 2,38 |
| 227319_at   | 79786  | C16orf44 | chromosome 16 open reading frame 44                                                                                                                      | -2,81 | 0,64 | 2,38 |
| 240463_at   | 10579  | TACC2    | transforming, acidic coiled-coil containing protein 2                                                                                                    | -2,81 | 0,43 | 2,38 |
| 227949_at   | 116154 | PHACTR3  | phosphatase and actin regulator 3                                                                                                                        | -2,81 | 0,44 | 2,38 |
| 213895_at   | 2012   | EMP1     | epithelial membrane protein 1                                                                                                                            | -2,80 | 0,41 | 2,38 |
| 209803_s_at | 7262   | PHLDA2   | pleckstrin homology-like domain, family A, member 2                                                                                                      | -2,80 | 0,39 | 2,38 |
| 217996_at   | 22822  | PHLDA1   | pleckstrin homology-like domain, family A, member 1                                                                                                      | -2,80 | 0,46 | 2,38 |
| 219092_s_at | 64768  | IPPK     | inositol 1,3,4,5,6-pentakisphosphate 2-kinase                                                                                                            | -2,80 | 0,60 | 2,38 |
| 202497_x_at | 6515   | SLC2A3   | solute carrier family 2 (facilitated glucose transporter), member 3                                                                                      | -2,80 | 0,45 | 2,38 |
| 211924_s_at | 5329   | PLAUR    | plasminogen activator, urokinase receptor                                                                                                                | -2,80 | 0,43 | 2,38 |
| 1570121_at  | 22891  | ZNF365   | zinc finger protein 365                                                                                                                                  | -2,80 | 0,58 | 2,38 |
| 24296--_at  | --     | --       | --                                                                                                                                                       | -2,80 | 0,51 | 2,38 |

|              |        |               |                                                                                     |       |      |      |
|--------------|--------|---------------|-------------------------------------------------------------------------------------|-------|------|------|
| 240039_at    | 22925  | PLA2R1        | phospholipase A2 receptor 1, 180kDa                                                 | -2,80 | 0,46 | 2,38 |
| 1563483_at   | 57234  | FAM91A2       | family with sequence similarity 91, member A2                                       | -2,80 | 0,50 | 2,38 |
| 221931_s_at  | 81929  | SEH1L         | SEH1-like ( <i>S. cerevisiae</i> )                                                  | -2,80 | 0,64 | 2,38 |
| 214638_s_at  | 905    | CCNT2         | cyclin T2                                                                           | -2,79 | 0,49 | 2,38 |
| 1552532_a_at | 245973 | ATP6V1C2      | ATPase, H+ transporting, lysosomal 42kDa, V1 subunit C2                             | -2,79 | 0,47 | 2,38 |
| 202068_s_at  | 3949   | LDLR          | low density lipoprotein receptor (familial hypercholesterolemia)                    | -2,79 | 0,39 | 2,38 |
| 23583--_at   | --     | --            | --                                                                                  | -2,79 | 0,62 | 2,38 |
| 218245_at    | 25987  | TSKU          | tsukushin                                                                           | -2,79 | 0,37 | 2,38 |
| 232181_at    | 153346 | LOC153346     | hypothetical protein LOC153346                                                      | -2,79 | 0,52 | 2,38 |
| 24--162_at   | --     | --            | --                                                                                  | -2,79 | 0,52 | 2,38 |
| 240910_at    | 64849  | SLC13A3       | solute carrier family 13 (sodium-dependent dicarboxylate transporter), member 3     | -2,79 | 0,40 | 2,38 |
| 214155_s_at  | 113251 | LARP4         | La ribonucleoprotein domain family, member 4                                        | -2,79 | 0,54 | 2,38 |
| 224698_at    | 57488  | FAM62B        | family with sequence similarity 62 (C2 domain containing) member B                  | -2,79 | 0,61 | 2,38 |
| 216323_x_at  | 113457 | TUBA3D        | tubulin, alpha 3d                                                                   | -2,79 | 0,56 | 2,38 |
| 213874_at    | 5267   | SERPINA4      | serpin peptidase inhibitor, clade A (alpha-1 antiproteinase, antitrypsin), member 4 | -2,79 | 0,45 | 2,38 |
| 224315_at    | 11218  | DDX20         | DEAD (Asp-Glu-Ala-Asp) box polypeptide 20                                           | -2,79 | 0,52 | 2,38 |
| 218678_at    | 10763  | NES           | nestin                                                                              | -2,79 | 0,43 | 2,38 |
| 244053_at    | 10257  | ABCC4         | ATP-binding cassette, sub-family C (CFTR/MRP), member 4                             | -2,78 | 0,54 | 2,38 |
| 226752_at    | 345757 | TMEM157       | transmembrane protein 157                                                           | -2,78 | 0,47 | 2,38 |
| 234846_at    | 284187 | DKFZp761P0212 | hypothetical protein DKFZp761P0212                                                  | -2,78 | 0,41 | 2,38 |
| 235553_at    | --     | --            | --                                                                                  | -2,78 | 0,57 | 2,38 |
| 336_at       | 6915   | TBXA2R        | thromboxane A2 receptor                                                             | -2,78 | 0,47 | 2,38 |
| 212292_at    | 6541   | SLC7A1        | solute carrier family 7 (cationic amino acid transporter, y+ system), member 1      | -2,78 | 0,57 | 2,38 |
| 243861_at    | 96459  | FNIP1         | folliculin interacting protein 1                                                    | -2,78 | 0,52 | 2,38 |
| 217548_at    | 348110 | C15orf38      | chromosome 15 open reading frame 38                                                 | -2,78 | 0,48 | 2,38 |

|               |        |          |                                                                            |       |      |      |
|---------------|--------|----------|----------------------------------------------------------------------------|-------|------|------|
| 224111_x_at   | 83855  | KLF16    | Kruppel-like factor 16                                                     | -2,78 | 0,43 | 2,74 |
| 236355_s_at   | --     | --       | --                                                                         | -2,78 | 0,47 | 2,74 |
| 225198_at     | 9218   | VAPA     | VAMP (vesicle-associated membrane protein)-associated protein A, 33kDa     | -2,78 | 0,53 | 2,74 |
| 237981_at     | 202333 | CMYA5    | cardiomyopathy associated 5                                                | -2,78 | 0,49 | 2,74 |
| 212400_at     | 399665 | FAM102A  | family with sequence similarity 102, member A                              | -2,78 | 0,54 | 2,74 |
| 203752_s_at   | 3727   | JUND     | jun D proto-oncogene                                                       | -2,77 | 0,64 | 2,74 |
| 213843_x_at   | 6535   | SLC6A8   | solute carrier family 6 (neurotransmitter transporter, creatine), member 8 | -2,77 | 0,54 | 2,74 |
| 239684_at     | --     | --       | --                                                                         | -2,77 | 0,47 | 2,74 |
| 236--81_at    | --     | --       | --                                                                         | -2,77 | 0,41 | 2,74 |
| 1555411_a_at  | 57018  | CCNL1    | cyclin L1                                                                  | -2,77 | 0,51 | 2,74 |
| 241887_at     | --     | --       | --                                                                         | -2,77 | 0,58 | 2,74 |
| 239543_s_at   | --     | --       | --                                                                         | -2,77 | 0,49 | 2,74 |
| 206383_s_at   | 9908   | G3BP2    | GTPase activating protein (SH3 domain) binding protein 2                   | -2,77 | 0,51 | 2,74 |
| 2--7737_at    | --     | --       | --                                                                         | -2,77 | 0,44 | 2,74 |
| 218793_s_at   | 6322   | SCML1    | sex comb on midleg-like 1 (Drosophila)                                     | -2,77 | 0,52 | 2,74 |
| 213268_at     | 23261  | CAMTA1   | calmodulin binding transcription activator 1                               | -2,77 | 0,52 | 2,74 |
| 239652_at     | 6786   | STIM1    | stromal interaction molecule 1                                             | -2,77 | 0,54 | 2,74 |
| 222660_s_at   | 152006 | RNF38    | ring finger protein 38                                                     | -2,77 | 0,56 | 2,74 |
| 204254_s_at   | 7421   | VDR      | vitamin D (1,25- dihydroxyvitamin D3) receptor                             | -2,77 | 0,41 | 2,74 |
| 212882_at     | 23276  | KLHL18   | kelch-like 18 (Drosophila)                                                 | -2,77 | 0,59 | 2,74 |
| 1553989_a_at  | 245973 | ATP6V1C2 | ATPase, H+ transporting, lysosomal 42kDa, V1 subunit C2                    | -2,77 | 0,51 | 2,74 |
| 242409_at     | 91750  | LIN52    | lin-52 homolog (C. elegans)                                                | -2,77 | 0,53 | 2,74 |
| 1557637_at    | 5530   | PPP3CA   | protein phosphatase 3 (formerly 2B), catalytic subunit, alpha isoform      | -2,77 | 0,43 | 2,74 |
| 203322_at     | 22850  | ADNP2    | ADNP homeobox 2                                                            | -2,77 | 0,56 | 2,74 |
| 156--869_a_at | --     | --       | --                                                                         | -2,77 | 0,48 | 2,74 |

|              |        |           |                                                                   |       |      |      |
|--------------|--------|-----------|-------------------------------------------------------------------|-------|------|------|
| 208354_s_at  | 6559   | SLC12A3   | solute carrier family 12 (sodium/chloride transporters), member 3 | -2,76 | 0,38 | 2,74 |
| 225569_at    | 27161  | EIF2C2    | eukaryotic translation initiation factor 2C, 2                    | -2,76 | 0,58 | 2,74 |
| 234106_s_at  | 84256  | FLYWCH1   | FLYWCH-type zinc finger 1                                         | -2,76 | 0,53 | 2,74 |
| 221576_at    | 9518   | GDF15     | growth differentiation factor 15                                  | -2,76 | 0,38 | 2,74 |
| 1565228_s_at | 213    | ALB       | albumin                                                           | -2,76 | 0,48 | 2,74 |
| 234660_s_at  | 22894  | DIS3      | DIS3 mitotic control homolog ( <i>S. cerevisiae</i> )             | -2,76 | 0,61 | 2,74 |
| 228399_at    | 130497 | OSR1      | odd-skipped related 1 ( <i>Drosophila</i> )                       | -2,76 | 0,45 | 2,74 |
| 156--383_at  | --     | --        | --                                                                | -2,76 | 0,41 | 2,74 |
| 241705_at    | 23461  | ABCA5     | ATP-binding cassette, sub-family A (ABC1), member 5               | -2,76 | 0,45 | 2,74 |
| 200733_s_at  | 7803   | PTP4A1    | protein tyrosine phosphatase type IVA, member 1                   | -2,76 | 0,60 | 2,74 |
| 232324_x_at  | 8613   | PPAP2B    | phosphatidic acid phosphatase type 2B                             | -2,76 | 0,47 | 2,74 |
| 219878_s_at  | 51621  | KLF13     | Kruppel-like factor 13                                            | -2,76 | 0,53 | 2,74 |
| 240721_at    | 57805  | KIAA1967  | KIAA1967                                                          | -2,76 | 0,50 | 2,74 |
| 217158_at    | 401525 | LOC401525 | CDK2-associated protein 2 pseudogene                              | -2,76 | 0,49 | 2,74 |
| 214965_at    | 124044 | SPATA2L   | spermatogenesis associated 2-like                                 | -2,75 | 0,46 | 2,74 |
| 215499_at    | 5606   | MAP2K3    | mitogen-activated protein kinase kinase 3                         | -2,75 | 0,63 | 2,74 |
| 202131_s_at  | 8780   | RIOK3     | RIO kinase 3 (yeast)                                              | -2,75 | 0,54 | 2,74 |
| 204182_s_at  | 23099  | ZBTB43    | zinc finger and BTB domain containing 43                          | -2,75 | 0,55 | 2,74 |
| 211740_at    | 3382   | ICA1      | islet cell autoantigen 1, 69kDa                                   | -2,75 | 0,56 | 2,74 |
| 212930_at    | 490    | ATP2B1    | ATPase, Ca <sup>++</sup> transporting, plasma membrane 1          | -2,75 | 0,59 | 2,74 |
| 230628_at    | 57634  | EP400     | E1A binding protein p400                                          | -2,75 | 0,59 | 2,74 |
| 221541_at    | 83716  | CRISPLD2  | cysteine-rich secretory protein LCCL domain containing 2          | -2,75 | 0,49 | 2,74 |
| 204472_at    | 2669   | GEM       | GTP binding protein overexpressed in skeletal muscle              | -2,75 | 0,46 | 2,74 |
| 238319_at    | --     | --        | --                                                                | -2,75 | 0,57 | 2,74 |
| 225980_at    | 91748  | C14orf43  | chromosome 14 open reading frame 43                               | -2,75 | 0,47 | 2,74 |
| 204176_at    | 27252  | KLHL20    | kelch-like 20 ( <i>Drosophila</i> )                               | -2,75 | 0,60 | 2,74 |
| 228967_at    | 10209  | EIF1      | eukaryotic translation initiation factor 1                        | -2,75 | 0,54 | 2,74 |
| 1560639_at   | 50861  | STMN3     | stathmin-like 3                                                   | -2,74 | 0,45 | 2,74 |

|                  |                    |                     |                                                                                                   |       |      |      |
|------------------|--------------------|---------------------|---------------------------------------------------------------------------------------------------|-------|------|------|
| 209395_at        | 1116               | CHI3L1              | chitinase 3-like 1 (cartilage glycoprotein-39)                                                    | -2,74 | 0,29 | 2,74 |
| 632_at           | 2931               | GSK3A               | glycogen synthase kinase 3 alpha                                                                  | -2,74 | 0,56 | 2,74 |
| 41387_r_at       | --                 | --                  | --                                                                                                | -2,74 | 0,54 | 2,74 |
| 226561_at        | 285086             | LOC285086           | hypothetical protein LOC285086                                                                    | -2,74 | 0,54 | 2,74 |
| 230005_at        | 258010             | DKFZp313A2432       | hypothetical protein DKFZp313A2432                                                                | -2,74 | 0,63 | 2,74 |
| 203490_at        | 2000               | ELF4                | E74-like factor 4 (ets domain transcription factor)                                               | -2,74 | 0,54 | 2,74 |
| 235745_at        | 2081               | ERN1                | endoplasmic reticulum to nucleus signalling 1                                                     | -2,74 | 0,49 | 2,74 |
| 1556136_at       | 340156             | RP11-145H9.1        | hypothetical protein LOC340156                                                                    | -2,74 | 0,52 | 2,74 |
| 1555292_at       | 57464              | FAM40B              | family with sequence similarity 40, member B                                                      | -2,74 | 0,50 | 2,74 |
| 1555461_at       | --                 | --                  | --                                                                                                | -2,74 | 0,56 | 2,74 |
| 1557120_at       | 1915               | EEF1A1              | eukaryotic translation elongation factor 1 alpha 1                                                | -2,74 | 0,47 | 2,74 |
| 209518_at        | 6602               | SMARCD1             | SWI/SNF related, matrix associated, actin dependent regulator of chromatin, subfamily d, member 1 | -2,74 | 0,51 | 2,74 |
| 223216_x_at      | 157574//<br>/55893 | FBXO16///ZNF<br>395 | F-box protein 16///zinc finger protein 395                                                        | -2,74 | 0,41 | 2,74 |
| 1555820_a_a<br>t | 54903              | MKS1                | Meckel syndrome, type 1                                                                           | -2,74 | 0,51 | 2,74 |
| 1555471_a_a<br>t | 56776              | FMN2                | formin 2                                                                                          | -2,74 | 0,45 | 2,74 |
| 226211_at        | 55384              | MEG3                | maternally expressed 3                                                                            | -2,74 | 0,56 | 2,74 |
| 243051_at        | 29097              | CNIH4               | cornichon homolog 4 (Drosophila)                                                                  | -2,74 | 0,51 | 2,74 |
| 209967_s_at      | 1390               | CREM                | cAMP responsive element modulator                                                                 | -2,74 | 0,49 | 2,74 |
| 208036_at        | 611                | OPN1SW              | opsin 1 (cone pigments), short-wave-sensitive (color blindness, tritan)                           | -2,74 | 0,50 | 2,74 |
| 216260_at        | 23405              | DICER1              | Dicer1, Dcr-1 homolog (Drosophila)                                                                | -2,74 | 0,55 | 2,74 |
| 230640_at        | 25766              | PRPF40B             | PRP40 pre-mRNA processing factor 40 homolog B (S. cerevisiae)                                     | -2,73 | 0,57 | 2,74 |
| 238509_at        | 8454               | CUL1                | cullin 1                                                                                          | -2,73 | 0,52 | 2,74 |
| 225283_at        | 91947              | ARRDC4              | arrestin domain containing 4                                                                      | -2,73 | 0,49 | 2,74 |



|              |        |          |                                                                                  |       |      |      |
|--------------|--------|----------|----------------------------------------------------------------------------------|-------|------|------|
| 204095_s_at  | 8178   | ELL      | elongation factor RNA polymerase II                                              | -2,73 | 0,52 | 2,74 |
| 229103_at    | 7473   | WNT3     | wingless-type MMTV integration site family, member 3                             | -2,73 | 0,47 | 2,74 |
| 202851_at    | 79719  | FLJ11506 | hypothetical protein FLJ11506                                                    | -2,73 | 0,43 | 2,74 |
| 231573_at    | 89885  | FATE1    | fetal and adult testis expressed 1                                               | -2,73 | 0,57 | 2,74 |
| 242538_at    | 7027   | TFDP1    | transcription factor Dp-1                                                        | -2,73 | 0,51 | 2,74 |
| 225289_at    | 6774   | STAT3    | signal transducer and activator of transcription 3 (acute-phase response factor) | -2,73 | 0,63 | 2,74 |
| 1554375_a_at | 9971   | NR1H4    | nuclear receptor subfamily 1, group H, member 4                                  | -2,73 | 0,54 | 2,74 |
| 225390_s_at  | 51621  | KLF13    | Kruppel-like factor 13                                                           | -2,73 | 0,64 | 2,74 |
| 230004_at    | 23358  | USP24    | ubiquitin specific peptidase 24                                                  | -2,73 | 0,60 | 2,74 |
| 229720_at    | 573    | BAG1     | BCL2-associated athanogene                                                       | -2,73 | 0,49 | 2,74 |
| 225366_at    | 55276  | PGM2     | phosphoglucomutase 2                                                             | -2,73 | 0,51 | 2,74 |
| 1560059_at   | 55048  | VPS37C   | vacuolar protein sorting 37 homolog C (S. cerevisiae)                            | -2,73 | 0,45 | 2,74 |
| 227682_at    | --     | --       | --                                                                               | -2,73 | 0,56 | 2,74 |
| 209340_at    | 6675   | UAP1     | UDP-N-acetylglucosamine pyrophosphorylase 1                                      | -2,73 | 0,56 | 2,74 |
| 235379_at    | --     | --       | --                                                                               | -2,73 | 0,50 | 2,74 |
| 229544_at    | --     | --       | --                                                                               | -2,73 | 0,53 | 2,74 |
| 202103_at    | 23476  | BRD4     | bromodomain containing 4                                                         | -2,72 | 0,46 | 2,74 |
| 207765_s_at  | 80256  | KIAA1539 | KIAA1539                                                                         | -2,72 | 0,54 | 2,74 |
| 228802_at    | 348093 | RBPM52   | RNA binding protein with multiple splicing 2                                     | -2,72 | 0,51 | 2,74 |
| 204429_s_at  | 6518   | SLC2A5   | solute carrier family 2 (facilitated glucose/fructose transporter), member 5     | -2,72 | 0,57 | 2,74 |
| 223618_at    | 56776  | FMN2     | formin 2                                                                         | -2,72 | 0,40 | 2,74 |
| 224083_s_at  | 29013  | PRO1596  | PRO1596 protein                                                                  | -2,72 | 0,57 | 2,74 |
| 232857_at    | 171568 | POLR3H   | polymerase (RNA) III (DNA directed) polypeptide H (22.9kD)                       | -2,72 | 0,57 | 2,74 |
| 212853_at    | 23142  | DCUN1D4  | DCN1, defective in cullin neddylation 1, domain containing 4 (S. cerevisiae)     | -2,72 | 0,55 | 2,74 |
| 205765_at    | 1577   | CYP3A5   | cytochrome P450, family 3, subfamily A, polypeptide 5                            | -2,72 | 0,41 | 2,74 |

|             |        |          |                                                                                |       |      |      |
|-------------|--------|----------|--------------------------------------------------------------------------------|-------|------|------|
| 1552792_at  | 122809 | SOCS4    | suppressor of cytokine signaling 4                                             | -2,72 | 0,49 | 2,74 |
| 212521_s_at | 5151   | PDE8A    | phosphodiesterase 8A                                                           | -2,72 | 0,54 | 2,74 |
| 202922_at   | 2729   | GCLC     | glutamate-cysteine ligase, catalytic subunit                                   | -2,71 | 0,55 | 2,74 |
| 213935_at   | 51099  | ABHD5    | abhydrolase domain containing 5                                                | -2,71 | 0,62 | 2,74 |
| 210004_at   | 4973   | OLR1     | oxidized low density lipoprotein (lectin-like) receptor 1                      | -2,71 | 0,43 | 2,74 |
| 201206_s_at | 6238   | RRBP1    | ribosome binding protein 1 homolog 180kDa (dog)                                | -2,71 | 0,63 | 2,74 |
| 215337_at   | 9862   | THRAP4   | thyroid hormone receptor associated protein 4                                  | -2,71 | 0,47 | 2,74 |
| 210275_s_at | 7763   | ZFAND5   | zinc finger, AN1-type domain 5                                                 | -2,71 | 0,61 | 2,74 |
| 206788_s_at | 865    | CBFB     | core-binding factor, beta subunit                                              | -2,71 | 0,55 | 2,74 |
| 203574_at   | 4783   | NFIL3    | nuclear factor, interleukin 3 regulated                                        | -2,71 | 0,49 | 2,74 |
| 232494_at   | 1582   | CYP8B1   | cytochrome P450, family 8, subfamily B, polypeptide 1                          | -2,71 | 0,44 | 2,74 |
| 214212_x_at | 10979  | PLEKHC1  | pleckstrin homology domain containing, family C (with FERM domain) member 1    | -2,71 | 0,50 | 2,74 |
| 214842_s_at | 213    | ALB      | albumin                                                                        | -2,71 | 0,45 | 2,74 |
| 228263_at   | 160622 | GRASP    | GRP1 (general receptor for phosphoinositides 1)-associated scaffold protein    | -2,71 | 0,42 | 2,74 |
| 218029_at   | 79567  | FAM65A   | family with sequence similarity 65, member A                                   | -2,71 | 0,56 | 2,74 |
| 209706_at   | 4824   | NKX3-1   | NK3 homeobox 1                                                                 | -2,70 | 0,52 | 2,74 |
| 218062_x_at | 23580  | CDC42EP4 | CDC42 effector protein (Rho GTPase binding) 4                                  | -2,70 | 0,60 | 2,74 |
| 204440_at   | 9308   | CD83     | CD83 molecule                                                                  | -2,70 | 0,54 | 2,74 |
| 218222_x_at | 405    | ARNT     | aryl hydrocarbon receptor nuclear translocator                                 | -2,70 | 0,55 | 2,74 |
| 239873_at   | --     | --       | --                                                                             | -2,70 | 0,58 | 2,74 |
| 225212_at   | 114789 | SLC25A25 | solute carrier family 25 (mitochondrial carrier; phosphate carrier), member 25 | -2,70 | 0,42 | 2,74 |
| 232865_at   | 27125  | AFF4     | AF4/FMR2 family, member 4                                                      | -2,70 | 0,55 | 2,74 |
| 226003_at   | 55605  | KIF21A   | kinesin family member 21A                                                      | -2,70 | 0,61 | 2,74 |

|             |        |          |                                                                                                                  |       |      |      |
|-------------|--------|----------|------------------------------------------------------------------------------------------------------------------|-------|------|------|
| 222905_s_at | 55260  | TMEM143  | transmembrane protein 143                                                                                        | -2,70 | 0,52 | 2,74 |
| 205960_at   | 5166   | PDK4     | pyruvate dehydrogenase kinase, isozyme 4                                                                         | -2,70 | 0,46 | 2,74 |
| 236217_at   | 1317   | SLC31A1  | solute carrier family 31 (copper transporters), member 1                                                         | -2,70 | 0,52 | 2,74 |
| 234156_at   | 9645   | MICAL2   | microtubule associated monooxygenase, calponin and LIM domain containing 2                                       | -2,69 | 0,54 | 2,74 |
| 201277_s_at | 3182   | HNRPAB   | heterogeneous nuclear ribonucleoprotein A/B                                                                      | -2,69 | 0,61 | 2,74 |
| 233802_at   | 27146  | KIAA1276 | KIAA1276 protein                                                                                                 | -2,69 | 0,48 | 2,74 |
| 215078_at   | 6648   | SOD2     | superoxide dismutase 2, mitochondrial                                                                            | -2,69 | 0,46 | 2,74 |
| 1554194_at  | 57805  | KIAA1967 | KIAA1967                                                                                                         | -2,69 | 0,60 | 2,74 |
| 212723_at   | 23210  | JMJD6    | jumonji domain containing 6                                                                                      | -2,69 | 0,56 | 2,74 |
| 239218_at   | --     | --       | --                                                                                                               | -2,69 | 0,47 | 2,74 |
| 228188_at   | 2355   | FOSL2    | FOS-like antigen 2                                                                                               | -2,69 | 0,53 | 2,74 |
| 226952_at   | 85403  | EAF1     | ELL associated factor 1                                                                                          | -2,69 | 0,63 | 2,74 |
| 242438_at   | --     | --       | --                                                                                                               | -2,69 | 0,60 | 2,74 |
| 1563742_at  | --     | --       | --                                                                                                               | -2,69 | 0,52 | 2,74 |
| 229341_at   | 29842  | TFCP2L1  | transcription factor CP2-like 1                                                                                  | -2,69 | 0,43 | 2,74 |
| 222703_s_at | 79693  | YRDC     | yrdC domain containing (E. coli)                                                                                 | -2,69 | 0,51 | 2,74 |
| 219039_at   | 54910  | SEMA4C   | sema domain, immunoglobulin domain (Ig), transmembrane domain (TM) and short cytoplasmic domain, (semaphorin) 4C | -2,69 | 0,58 | 2,74 |
| 242055_at   | 63027  | C6orf85  | chromosome 6 open reading frame 85                                                                               | -2,69 | 0,48 | 2,74 |
| 219671_at   | 51440  | HPCAL4   | hippocalcin like 4                                                                                               | -2,69 | 0,52 | 2,74 |
| 244187_at   | 340562 | SATL1    | spermidine/spermine N1-acetyl transferase-like 1                                                                 | -2,69 | 0,52 | 2,74 |
| 157--469_at | --     | --       | --                                                                                                               | -2,69 | 0,57 | 2,74 |
| 230047_at   | 143872 | FLJ32810 | hypothetical protein FLJ32810                                                                                    | -2,69 | 0,45 | 2,74 |
| 233952_s_at | 49854  | ZNF295   | zinc finger protein 295                                                                                          | -2,69 | 0,52 | 2,74 |
| 201830_s_at | 10276  | NET1     | neuroepithelial cell transforming gene 1                                                                         | -2,69 | 0,55 | 2,74 |
| 228562_at   | 65986  | ZBTB10   | zinc finger and BTB domain containing 10                                                                         | -2,68 | 0,59 | 2,74 |
| 226660_at   | 6198   | RPS6KB1  | ribosomal protein S6 kinase, 70kDa, polypeptide 1                                                                | -2,68 | 0,62 | 2,74 |
| 244697_at   | 7704   | ZBTB16   | zinc finger and BTB domain containing 16                                                                         | -2,68 | 0,49 | 2,74 |
| 227250_at   | 83999  | KREMEN1  | kringle containing transmembrane protein 1                                                                       | -2,68 | 0,56 | 2,74 |

|              |        |             |                                                                                     |       |      |      |
|--------------|--------|-------------|-------------------------------------------------------------------------------------|-------|------|------|
| 1567375_at   | --     | --          | --                                                                                  | -2,68 | 0,45 | 2,74 |
| 217997_at    | 22822  | PHLDA1      | pleckstrin homology-like domain, family A, member 1                                 | -2,68 | 0,44 | 2,74 |
| 223743_s_at  | 51073  | MRPL4       | mitochondrial ribosomal protein L4                                                  | -2,68 | 0,55 | 2,74 |
| 229319_at    | --     | --          | --                                                                                  | -2,68 | 0,55 | 2,74 |
| 202388_at    | 5997   | RGS2        | regulator of G-protein signalling 2, 24kDa                                          | -2,68 | 0,49 | 2,74 |
| 208565_at    | 4161   | MC5R        | melanocortin 5 receptor                                                             | -2,68 | 0,50 | 2,74 |
| 215751_at    | 64062  | RBM26       | RNA binding motif protein 26                                                        | -2,68 | 0,52 | 2,74 |
| 224681_at    | 2768   | GNA12       | guanine nucleotide binding protein (G protein) alpha 12                             | -2,68 | 0,63 | 2,74 |
| 217999_s_at  | 22822  | PHLDA1      | pleckstrin homology-like domain, family A, member 1                                 | -2,68 | 0,45 | 2,74 |
| 235015_at    | 51114  | ZDHHC9      | zinc finger, DHHC-type containing 9                                                 | -2,68 | 0,55 | 2,74 |
| 227542_at    | 9306   | SOCS6       | suppressor of cytokine signaling 6                                                  | -2,68 | 0,61 | 2,74 |
| 202101_s_at  | 5899   | RALB        | v-ral simian leukemia viral oncogene homolog B (ras related; GTP binding protein)   | -2,68 | 0,56 | 2,74 |
| 225492_at    | --     | --          | --                                                                                  | -2,68 | 0,64 | 2,74 |
| 1555976_s_at | --     | --          | --                                                                                  | -2,68 | 0,47 | 2,74 |
| 217824_at    | 51465  | UBE2J1      | ubiquitin-conjugating enzyme E2, J1 (UBC6 homolog, yeast)                           | -2,67 | 0,58 | 2,74 |
| 232240_at    | 387750 | CCDC35      | coiled-coil domain containing 35                                                    | -2,67 | 0,53 | 2,74 |
| 242780_at    | 9218   | VAPA        | VAMP (vesicle-associated membrane protein)-associated protein A, 33kDa              | -2,67 | 0,53 | 2,74 |
| 202935_s_at  | 6662   | SOX9        | SRY (sex determining region Y)-box 9 (campomelic dysplasia, autosomal sex-reversal) | -2,67 | 0,49 | 2,74 |
| 226922_at    | 5903   | RANBP2      | RAN binding protein 2                                                               | -2,67 | 0,62 | 2,74 |
| 208841_s_at  | 9908   | G3BP2       | GTPase activating protein (SH3 domain) binding protein 2                            | -2,67 | 0,67 | 2,74 |
| 222459_at    | --     | --          | --                                                                                  | -2,67 | 0,65 | 2,74 |
| 202759_s_at  | 445815 | PALM2-AKAP2 | PALM2-AKAP2 protein                                                                 | -2,67 | 0,55 | 2,74 |
| 226625_at    | 7049   | TGFBR3      | transforming growth factor, beta receptor III                                       | -2,67 | 0,59 | 2,74 |
| 212763_at    | 23271  | CAMSAP1L1   | calmodulin regulated spectrin-associated protein 1-like 1                           | -2,67 | 0,56 | 2,74 |

|             |        |          |                                                                                  |       |      |      |
|-------------|--------|----------|----------------------------------------------------------------------------------|-------|------|------|
| 220236_at   | 55066  | PDPR     | pyruvate dehydrogenase phosphatase regulatory subunit                            | -2,67 | 0,47 | 2,74 |
| 222816_s_at | 54877  | ZCCHC2   | zinc finger, CCHC domain containing 2                                            | -2,67 | 0,53 | 2,74 |
| 204276_at   | 7084   | TK2      | thymidine kinase 2, mitochondrial                                                | -2,67 | 0,62 | 3,08 |
| 202540_s_at | 3156   | HMGCR    | 3-hydroxy-3-methylglutaryl-Coenzyme A reductase                                  | -2,67 | 0,51 | 3,08 |
| 201149_s_at | 7078   | TIMP3    | TIMP metalloproteinase inhibitor 3 (Sorsby fundus dystrophy, pseudoinflammatory) | -2,67 | 0,44 | 3,08 |
| 213600_at   | 23094  | SIPA1L3  | signal-induced proliferation-associated 1 like 3                                 | -2,67 | 0,46 | 3,08 |
| 209210_s_at | 10979  | PLEKHC1  | pleckstrin homology domain containing, family C (with FERM domain) member 1      | -2,67 | 0,62 | 3,08 |
| 242963_at   | 166929 | SGMS2    | sphingomyelin synthase 2                                                         | -2,67 | 0,50 | 3,08 |
| 242636_at   | 5547   | PRCP     | prolylcarboxypeptidase (angiotensinase C)                                        | -2,67 | 0,52 | 3,08 |
| 202149_at   | 4739   | NEDD9    | neural precursor cell expressed, developmentally down-regulated 9                | -2,66 | 0,55 | 3,08 |
| 1558533_at  | 124751 | KRBA2    | KRAB-A domain containing 2                                                       | -2,66 | 0,38 | 3,08 |
| 225306_s_at | 123096 | SLC25A29 | solute carrier family 25, member 29                                              | -2,66 | 0,53 | 3,08 |
| 220892_s_at | 29968  | PSAT1    | phosphoserine aminotransferase 1                                                 | -2,66 | 0,51 | 3,08 |
| 202438_x_at | 3423   | IDS      | iduronate 2-sulfatase (Hunter syndrome)                                          | -2,66 | 0,57 | 3,08 |
| 243917_at   | 53405  | CLIC5    | chloride intracellular channel 5                                                 | -2,66 | 0,45 | 3,08 |
| 212229_s_at | 23014  | FBXO21   | F-box protein 21                                                                 | -2,66 | 0,58 | 3,08 |
| 225227_at   | 6498   | SKIL     | SKI-like oncogene                                                                | -2,66 | 0,60 | 3,08 |
| 243419_at   | --     | --       | --                                                                               | -2,66 | 0,49 | 3,08 |
| 222717_at   | 8436   | SDPR     | serum deprivation response (phosphatidylserine binding protein)                  | -2,66 | 0,49 | 3,08 |
| 243--86_at  | --     | --       | --                                                                               | -2,66 | 0,52 | 3,08 |
| 1560738_at  | 9690   | UBE3C    | ubiquitin protein ligase E3C                                                     | -2,66 | 0,57 | 3,08 |
| 1553556_at  | 259286 | TAS2R40  | taste receptor, type 2, member 40                                                | -2,66 | 0,55 | 3,08 |
| 204206_at   | 4335   | MNT      | MAX binding protein                                                              | -2,66 | 0,60 | 3,08 |
| 232053_x_at | 57414  | RHBDD2   | rhomboid domain containing 2                                                     | -2,66 | 0,58 | 3,08 |
| 223296_at   | 84275  | SLC25A33 | solute carrier family 25, member 33                                              | -2,66 | 0,53 | 3,08 |
| 2381----_at | --     | --       | --                                                                               | -2,66 | 0,56 | 3,08 |
| 1564022_at  | 219578 | ZNF804B  | zinc finger protein 804B                                                         | -2,65 | 0,58 | 3,08 |

|                  |        |         |                                                                          |       |      |      |
|------------------|--------|---------|--------------------------------------------------------------------------|-------|------|------|
| 229226_at        | 64210  | MMS19L  | MMS19-like (MET18 homolog, <i>S. cerevisiae</i> )                        | -2,65 | 0,59 | 3,08 |
| 1567219_at       | --     | --      | --                                                                       | -2,65 | 0,55 | 3,08 |
| 242--58_at       | --     | --      | --                                                                       | -2,65 | 0,50 | 3,08 |
| 223704_s_at      | 10655  | DMRT2   | doublesex and mab-3 related transcription factor 2                       | -2,65 | 0,51 | 3,08 |
| 232977_x_at      | 79784  | MYH14   | myosin, heavy chain 14                                                   | -2,65 | 0,51 | 3,08 |
| 2364--2_at       | --     | --      | --                                                                       | -2,65 | 0,57 | 3,08 |
| 203835_at        | 2615   | LRRC32  | leucine rich repeat containing 32                                        | -2,65 | 0,52 | 3,08 |
| 36742_at         | 89870  | TRIM15  | tripartite motif-containing 15                                           | -2,65 | 0,42 | 3,08 |
| 228181_at        | 7779   | SLC30A1 | solute carrier family 30 (zinc transporter), member 1                    | -2,65 | 0,52 | 3,08 |
| 242836_at        | 483    | ATP1B3  | ATPase, Na <sup>+</sup> /K <sup>+</sup> transporting, beta 3 polypeptide | -2,65 | 0,50 | 3,08 |
| 218208_at        | 80148  | PQLC1   | PQ loop repeat containing 1                                              | -2,65 | 0,44 | 3,08 |
| 238972_at        | --     | --      | --                                                                       | -2,65 | 0,58 | 3,08 |
| 242941_x_at      | 6899   | TBX1    | T-box 1                                                                  | -2,65 | 0,62 | 3,08 |
| 1565863_at       | 9414   | TJP2    | tight junction protein 2 (zona occludens 2)                              | -2,65 | 0,52 | 3,08 |
| 202933_s_at      | 7525   | YES1    | v-yes-1 Yamaguchi sarcoma viral oncogene homolog 1                       | -2,65 | 0,63 | 3,08 |
| 203344_s_at      | 5932   | RBBP8   | retinoblastoma binding protein 8                                         | -2,65 | 0,56 | 3,08 |
| 234584_s_at      | 11101  | ATE1    | arginyltransferase 1                                                     | -2,65 | 0,60 | 3,08 |
| 202304_at        | 22862  | FNDC3A  | fibronectin type III domain containing 3A                                | -2,65 | 0,60 | 3,08 |
| 221664_s_at      | 50848  | F11R    | F11 receptor                                                             | -2,65 | 0,58 | 3,08 |
| 211984_at        | 801    | CALM1   | calmodulin 1 (phosphorylase kinase, delta)                               | -2,64 | 0,63 | 3,08 |
| 203973_s_at      | 1052   | CEBPD   | CCAAT/enhancer binding protein (C/EBP), delta                            | -2,64 | 0,56 | 3,08 |
| 23--3--2_at      | --     | --      | --                                                                       | -2,64 | 0,52 | 3,08 |
| 221918_at        | 5128   | PCK2    | PCTAIRE protein kinase 2                                                 | -2,64 | 0,59 | 3,08 |
| 240292_x_at      | 56899  | ANKS1B  | ankyrin repeat and sterile alpha motif domain containing 1B              | -2,64 | 0,52 | 3,08 |
| 207453_s_at      | 25822  | DNAJB5  | DnaJ (Hsp40) homolog, subfamily B, member 5                              | -2,64 | 0,43 | 3,08 |
| 1554915_a_a<br>t | 201626 | 2'-PDE  | 2'-phosphodiesterase                                                     | -2,64 | 0,58 | 3,08 |

|              |                   |                      |                                                                                                                                            |       |      |      |
|--------------|-------------------|----------------------|--------------------------------------------------------------------------------------------------------------------------------------------|-------|------|------|
| 213522_s_at  | 9123              | SLC16A3              | solute carrier family 16, member 3 (monocarboxylic acid transporter 4)                                                                     | -2,64 | 0,44 | 3,08 |
| 213225_at    | 5495              | PPM1B                | protein phosphatase 1B (formerly 2C), magnesium-dependent, beta isoform                                                                    | -2,64 | 0,63 | 3,08 |
| 235179_at    | 121274            | ZNF641               | zinc finger protein 641                                                                                                                    | -2,64 | 0,60 | 3,08 |
| 203592_s_at  | 10272             | FSTL3                | follistatin-like 3 (secreted glycoprotein)                                                                                                 | -2,64 | 0,59 | 3,08 |
| 243955_at    | --                | --                   | --                                                                                                                                         | -2,64 | 0,48 | 3,08 |
| 1553599_a_at | 50511             | SYCP3                | synaptonemal complex protein 3                                                                                                             | -2,64 | 0,55 | 3,08 |
| 24--557_at   | --                | --                   | --                                                                                                                                         | -2,64 | 0,53 | 3,08 |
| 224739_at    | 415116            | PIM3                 | pim-3 oncogene                                                                                                                             | -2,64 | 0,53 | 3,08 |
| 235679_at    | --                | --                   | --                                                                                                                                         | -2,64 | 0,48 | 3,08 |
| 36564_at     | 127544            | IBRDC3               | IBR domain containing 3                                                                                                                    | -2,63 | 0,55 | 3,08 |
| 216236_s_at  | 144195//<br>/6515 | SLC2A14///SL<br>C2A3 | solute carrier family 2 (facilitated glucose transporter), member 14///solute carrier family 2 (facilitated glucose transporter), member 3 | -2,63 | 0,45 | 3,08 |
| 227614_at    | 80201             | HKDC1                | hexokinase domain containing 1                                                                                                             | -2,63 | 0,51 | 3,08 |
| 206818_s_at  | 54805             | CNNM2                | cyclin M2                                                                                                                                  | -2,63 | 0,48 | 3,08 |
| 206543_at    | 6595              | SMARCA2              | SWI/SNF related, matrix associated, actin dependent regulator of chromatin, subfamily a, member 2                                          | -2,63 | 0,51 | 3,08 |
| 208578_at    | 6336              | SCN10A               | sodium channel, voltage-gated, type X, alpha subunit                                                                                       | -2,63 | 0,61 | 3,08 |
| 230493_at    | 387914            | TMEM46               | transmembrane protein 46                                                                                                                   | -2,63 | 0,54 | 3,08 |
| 233849_s_at  | 394               | ARHGAP5              | Rho GTPase activating protein 5                                                                                                            | -2,63 | 0,60 | 3,08 |
| 219998_at    | 29094             | HSPC159              | galectin-related protein                                                                                                                   | -2,63 | 0,51 | 3,08 |
| 243959_at    | 4289              | MKLN1                | muskelin 1, intracellular mediator containing kelch motifs                                                                                 | -2,63 | 0,47 | 3,08 |
| 211466_at    | 4781              | NFIB                 | nuclear factor I/B                                                                                                                         | -2,63 | 0,50 | 3,08 |
| 227920_at    | 57673             | KIAA1553             | KIAA1553                                                                                                                                   | -2,63 | 0,50 | 3,08 |
| 1556194_a_at | --                | --                   | --                                                                                                                                         | -2,63 | 0,56 | 3,08 |
| 222382_x_at  | 23165             | NUP205               | nucleoporin 205kDa                                                                                                                         | -2,63 | 0,54 | 3,08 |
| 220947_s_at  | 26000             | TBC1D10B             | TBC1 domain family, member 10B                                                                                                             | -2,63 | 0,59 | 3,08 |

|              |        |          |                                                                                   |       |      |      |
|--------------|--------|----------|-----------------------------------------------------------------------------------|-------|------|------|
| 241483_at    | --     | --       | --                                                                                | -2,63 | 0,53 | 3,08 |
| 235791_x_at  | 1105   | CHD1     | chromodomain helicase DNA binding protein 1                                       | -2,63 | 0,67 | 3,08 |
| 1558143_a_at | 10018  | BCL2L11  | BCL2-like 11 (apoptosis facilitator)                                              | -2,63 | 0,53 | 3,08 |
| 203367_at    | 11072  | DUSP14   | dual specificity phosphatase 14                                                   | -2,62 | 0,54 | 3,08 |
| 204551_s_at  | 197    | AHSG     | alpha-2-HS-glycoprotein                                                           | -2,62 | 0,46 | 3,08 |
| 1559--62_at  | --     | --       | --                                                                                | -2,62 | 0,54 | 3,08 |
| 204507_s_at  | 5534   | PPP3R1   | protein phosphatase 3 (formerly 2B), regulatory subunit B, alpha isoform          | -2,62 | 0,48 | 3,08 |
| 215427_s_at  | 23174  | ZCCHC14  | zinc finger, CCHC domain containing 14                                            | -2,62 | 0,51 | 3,08 |
| 206871_at    | 1991   | ELA2     | elastase 2, neutrophil                                                            | -2,62 | 0,62 | 3,08 |
| 204970_s_at  | 4097   | MAFG     | v-maf musculoaponeurotic fibrosarcoma oncogene homolog G (avian)                  | -2,62 | 0,51 | 3,08 |
| 225609_at    | 2936   | GSR      | glutathione reductase                                                             | -2,62 | 0,65 | 3,08 |
| 202084_s_at  | 6397   | SEC14L1  | SEC14-like 1 ( <i>S. cerevisiae</i> )                                             | -2,62 | 0,53 | 3,08 |
| 236343_at    | 26515  | FXC1     | fracture callus 1 homolog (rat)                                                   | -2,62 | 0,57 | 3,08 |
| 222506_at    | 64327  | LMBR1    | limb region 1 homolog (mouse)                                                     | -2,62 | 0,60 | 3,08 |
| 1555252_a_at | 80036  | TRPM3    | transient receptor potential cation channel, subfamily M, member 3                | -2,61 | 0,54 | 3,08 |
| 243042_at    | 374986 | FAM73A   | family with sequence similarity 73, member A                                      | -2,61 | 0,52 | 3,08 |
| 1565839_a_at | --     | --       | --                                                                                | -2,61 | 0,58 | 3,08 |
| 1553315_at   | 200172 | SLFNL1   | schlafen-like 1                                                                   | -2,61 | 0,54 | 3,08 |
| 239096_at    | 93487  | C14orf32 | chromosome 14 open reading frame 32                                               | -2,61 | 0,56 | 3,08 |
| 212297_at    | 79572  | ATP13A3  | ATPase type 13A3                                                                  | -2,61 | 0,66 | 3,08 |
| 204096_s_at  | 8178   | ELL      | elongation factor RNA polymerase II                                               | -2,61 | 0,50 | 3,08 |
| 223388_s_at  | 53349  | ZFYVE1   | zinc finger, FYVE domain containing 1                                             | -2,61 | 0,51 | 3,08 |
| 238477_at    | 10749  | KIF1C    | kinesin family member 1C                                                          | -2,61 | 0,55 | 3,08 |
| 1567274_at   | --     | --       | --                                                                                | -2,61 | 0,45 | 3,08 |
| 223391_at    | 81537  | SGPP1    | sphingosine-1-phosphate phosphatase 1                                             | -2,61 | 0,58 | 3,08 |
| 202401_s_at  | 6722   | SRF      | serum response factor (c-fos serum response element-binding transcription factor) | -2,61 | 0,53 | 3,08 |



|             |        |          |                                                                                                           |       |      |      |
|-------------|--------|----------|-----------------------------------------------------------------------------------------------------------|-------|------|------|
| 219023_at   | 55435  | C4orf16  | chromosome 4 open reading frame 16                                                                        | -2,61 | 0,64 | 3,08 |
| 241809_at   | 55924  | C1orf183 | chromosome 1 open reading frame 183                                                                       | -2,60 | 0,58 | 3,08 |
| 2383--7_at  | --     | --       | --                                                                                                        | -2,60 | 0,48 | 3,08 |
| 216604_s_at | 23428  | SLC7A8   | solute carrier family 7 (cationic amino acid transporter, y+ system), member 8                            | -2,60 | 0,46 | 3,08 |
| 216906_at   | 6768   | ST14     | suppression of tumorigenicity 14 (colon carcinoma)                                                        | -2,60 | 0,63 | 3,08 |
| 225268_at   | 3840   | KPNA4    | karyopherin alpha 4 (importin alpha 3)                                                                    | -2,60 | 0,65 | 3,08 |
| 202856_s_at | 9123   | SLC16A3  | solute carrier family 16, member 3 (monocarboxylic acid transporter 4)                                    | -2,60 | 0,52 | 3,08 |
| 242522_at   | --     | --       | --                                                                                                        | -2,60 | 0,53 | 3,08 |
| 242477_at   | 158219 | C9orf52  | chromosome 9 open reading frame 52                                                                        | -2,60 | 0,62 | 3,08 |
| 1557257_at  | --     | --       | --                                                                                                        | -2,60 | 0,48 | 3,08 |
| 217998_at   | 22822  | PHLDA1   | pleckstrin homology-like domain, family A, member 1                                                       | -2,60 | 0,49 | 3,08 |
| 225842_at   | 22822  | PHLDA1   | pleckstrin homology-like domain, family A, member 1                                                       | -2,60 | 0,52 | 3,08 |
| 231358_at   | --     | --       | --                                                                                                        | -2,60 | 0,47 | 3,08 |
| 203474_at   | 10788  | IQGAP2   | IQ motif containing GTPase activating protein 2                                                           | -2,60 | 0,52 | 3,08 |
| 202008_s_at | 4811   | NID1     | nidogen 1                                                                                                 | -2,60 | 0,59 | 3,08 |
| 1554850_at  | 90113  | LOC90113 | hypothetical protein BC009862                                                                             | -2,60 | 0,47 | 3,08 |
| 224699_s_at | 57488  | FAM62B   | family with sequence similarity 62 (C2 domain containing) member B                                        | -2,60 | 0,60 | 3,08 |
| 229368_s_at | 7763   | ZFAND5   | zinc finger, AN1-type domain 5                                                                            | -2,60 | 0,50 | 3,08 |
| 226345_at   | 221079 | ARL5B    | ADP-ribosylation factor-like 5B                                                                           | -2,60 | 0,62 | 3,08 |
| 224674_at   | 80727  | TTYH3    | tweety homolog 3 (Drosophila)                                                                             | -2,60 | 0,48 | 3,08 |
| 214978_s_at | 8497   | PPFIA4   | protein tyrosine phosphatase, receptor type, f polypeptide (PTPRF), interacting protein (liprin), alpha 4 | -2,59 | 0,51 | 3,08 |
| 203401_at   | 5634   | PRPS2    | phosphoribosyl pyrophosphate synthetase 2                                                                 | -2,59 | 0,61 | 3,08 |
| 212458_at   | 200734 | SPRED2   | sprouty-related, EVH1 domain containing 2                                                                 | -2,59 | 0,50 | 3,08 |
| 240135_x_at | 7078   | TIMP3    | TIMP metalloproteinase inhibitor 3 (Sorsby fundus dystrophy, pseudoinflammatory)                          | -2,59 | 0,40 | 3,08 |

|             |        |           |                                                                                      |       |      |      |
|-------------|--------|-----------|--------------------------------------------------------------------------------------|-------|------|------|
| 244--18_at  | --     | --        | --                                                                                   | -2,59 | 0,50 | 3,08 |
| 226144_at   | 57455  | REXO1     | REX1, RNA exonuclease 1 homolog (S. cerevisiae)                                      | -2,59 | 0,49 | 3,08 |
| 227161_at   | 64434  | NOM1      | nucleolar protein with MIF4G domain 1                                                | -2,59 | 0,61 | 3,08 |
| 227196_at   | 85415  | RHPN2     | rhophilin, Rho GTPase binding protein 2                                              | -2,59 | 0,60 | 3,08 |
| 232165_at   | 83481  | EPPK1     | epiplakin 1                                                                          | -2,59 | 0,57 | 3,08 |
| 239361_at   | 91768  | CABLES1   | Cdk5 and Abl enzyme substrate 1                                                      | -2,59 | 0,46 | 3,08 |
| 235329_at   | 124056 | NOXO1     | NADPH oxidase organizer 1                                                            | -2,59 | 0,52 | 3,08 |
| 226107_at   | 56913  | C1GALT1   | core 1 synthase, glycoprotein-N-acetylgalactosamine 3-beta-galactosyltransferase, 1  | -2,59 | 0,59 | 3,08 |
| 225183_at   | 29035  | C16orf72  | chromosome 16 open reading frame 72                                                  | -2,59 | 0,64 | 3,08 |
| 219531_at   | 55722  | CEP72     | centrosomal protein 72kDa                                                            | -2,59 | 0,50 | 3,08 |
| 200768_s_at | 4144   | MAT2A     | methionine adenosyltransferase II, alpha                                             | -2,59 | 0,66 | 3,08 |
| 239448_at   | --     | --        | --                                                                                   | -2,59 | 0,48 | 3,08 |
| 219622_at   | 55647  | RAB20     | RAB20, member RAS oncogene family                                                    | -2,59 | 0,50 | 3,08 |
| 1553140_at  | 53918  | PELO      | pelota homolog (Drosophila)                                                          | -2,59 | 0,56 | 3,08 |
| 233660_at   | 30844  | EHD4      | EH-domain containing 4                                                               | -2,59 | 0,48 | 3,08 |
| 207749_s_at | 5523   | PPP2R3A   | protein phosphatase 2 (formerly 2A), regulatory subunit B'', alpha                   | -2,59 | 0,55 | 3,08 |
| 225857_s_at | 388796 | LOC388796 | hypothetical LOC388796                                                               | -2,59 | 0,59 | 3,08 |
| 212226_s_at | 8613   | PPAP2B    | phosphatidic acid phosphatase type 2B                                                | -2,59 | 0,53 | 3,08 |
| 201067_at   | 5701   | PSMC2     | proteasome (prosome, macropain) 26S subunit, ATPase, 2                               | -2,58 | 0,59 | 3,08 |
| 230313_at   | 7084   | TK2       | thymidine kinase 2, mitochondrial                                                    | -2,58 | 0,61 | 3,08 |
| 219633_at   | 79183  | C20orf121 | chromosome 20 open reading frame 121                                                 | -2,58 | 0,56 | 3,08 |
| 222324_at   | 84033  | OBSCN     | obscurin, cytoskeletal calmodulin and titin-interacting RhoGEF                       | -2,58 | 0,54 | 3,08 |
| 210837_s_at | 5144   | PDE4D     | phosphodiesterase 4D, cAMP-specific (phosphodiesterase E3 dunce homolog, Drosophila) | -2,58 | 0,57 | 3,08 |
| 212871_at   | 8550   | MAPKAPK5  | mitogen-activated protein kinase-activated protein kinase 5                          | -2,58 | 0,63 | 3,08 |
| 232313_at   | 92293  | TMEM132C  | transmembrane protein 132C                                                           | -2,58 | 0,49 | 3,08 |

|                  |                   |                       |                                                                                                                                                                       |       |      |      |
|------------------|-------------------|-----------------------|-----------------------------------------------------------------------------------------------------------------------------------------------------------------------|-------|------|------|
| 233700_at        | 4660              | PPP1R12B              | protein phosphatase 1, regulatory (inhibitor) subunit 12B                                                                                                             | -2,58 | 0,57 | 3,08 |
| 213548_s_at      | 55573             | CDV3                  | CDV3 homolog (mouse)                                                                                                                                                  | -2,58 | 0,52 | 3,08 |
| 200606_at        | 1832              | DSP                   | desmoplakin                                                                                                                                                           | -2,58 | 0,61 | 3,08 |
| 226912_at        | 254887            | ZDHHC23               | zinc finger, DHHC-type containing 23                                                                                                                                  | -2,58 | 0,60 | 3,08 |
| 232837_at        | 63971             | KIF13A                | kinesin family member 13A                                                                                                                                             | -2,58 | 0,48 | 3,08 |
| 237337_at        | --                | --                    | --                                                                                                                                                                    | -2,58 | 0,48 | 3,08 |
| 219094_at        | 25852             | ARMC8                 | armadillo repeat containing 8                                                                                                                                         | -2,58 | 0,53 | 3,08 |
| 214099_s_at      | 9659              | PDE4DIP               | phosphodiesterase 4D interacting protein (myomegalin)                                                                                                                 | -2,58 | 0,60 | 3,08 |
| 227751_at        | 9141              | PDCD5                 | programmed cell death 5                                                                                                                                               | -2,58 | 0,52 | 3,08 |
| 242853_at        | 401106            | FLJ34208              | hypothetical gene supported by AK091527                                                                                                                               | -2,58 | 0,52 | 3,08 |
| 231397_at        | 163404            | PAP2D                 | phosphatidic acid phosphatase type 2                                                                                                                                  | -2,58 | 0,47 | 3,08 |
| 23--278_at       | --                | --                    | --                                                                                                                                                                    | -2,58 | 0,49 | 3,08 |
| 215812_s_at      | 386757//<br>/6535 | SLC6A10P///S<br>LC6A8 | solute carrier family 6 (neurotransmitter transporter, creatine), member 10 (pseudogene)///solute carrier family 6 (neurotransmitter transporter, creatine), member 8 | -2,57 | 0,57 | 3,08 |
| 219735_s_at      | 29842             | TFCP2L1               | transcription factor CP2-like 1                                                                                                                                       | -2,57 | 0,53 | 3,08 |
| 1564472_at       | --                | --                    | --                                                                                                                                                                    | -2,57 | 0,47 | 3,08 |
| 201308_s_at      | 55752             | 40787                 | septin 11                                                                                                                                                             | -2,57 | 0,60 | 3,08 |
| 1568954_s_at     | 29035             | C16orf72              | chromosome 16 open reading frame 72                                                                                                                                   | -2,57 | 0,49 | 3,31 |
| 202449_s_at      | 6256              | RXRA                  | retinoid X receptor, alpha                                                                                                                                            | -2,57 | 0,55 | 3,31 |
| 52164_at         | 53838             | C11orf24              | chromosome 11 open reading frame 24                                                                                                                                   | -2,57 | 0,54 | 3,31 |
| 204141_at        | 7280              | TUBB2A                | tubulin, beta 2A                                                                                                                                                      | -2,57 | 0,54 | 3,31 |
| 23--5--3_at      | --                | --                    | --                                                                                                                                                                    | -2,57 | 0,52 | 3,31 |
| 1558279_a_a<br>t | --                | --                    | --                                                                                                                                                                    | -2,57 | 0,59 | 3,31 |
| 234068_s_at      | 160               | AP2A1                 | adaptor-related protein complex 2, alpha 1 subunit                                                                                                                    | -2,57 | 0,63 | 3,31 |
| 232625_at        | 83660             | TLN2                  | talin 2                                                                                                                                                               | -2,57 | 0,47 | 3,31 |
| 222809_x_at      | 317762            | C14orf65              | chromosome 14 open reading frame 65                                                                                                                                   | -2,57 | 0,55 | 3,31 |
| 202912_at        | 133               | ADM                   | adrenomedullin                                                                                                                                                        | -2,57 | 0,50 | 3,31 |

|              |        |          |                                                                                                   |       |      |      |
|--------------|--------|----------|---------------------------------------------------------------------------------------------------|-------|------|------|
| 1554980_a_at | 467    | ATF3     | activating transcription factor 3                                                                 | -2,57 | 0,49 | 3,31 |
| 217739_s_at  | 10135  | PBEF1    | pre-B-cell colony enhancing factor 1                                                              | -2,57 | 0,57 | 3,31 |
| 212213_x_at  | 4976   | OPA1     | optic atrophy 1 (autosomal dominant)                                                              | -2,57 | 0,59 | 3,31 |
| 201461_s_at  | 9261   | MAPKAPK2 | mitogen-activated protein kinase-activated protein kinase 2                                       | -2,57 | 0,54 | 3,31 |
| 232087_at    | 256643 | CXorf23  | chromosome X open reading frame 23                                                                | -2,57 | 0,55 | 3,31 |
| 204258_at    | 1105   | CHD1     | chromodomain helicase DNA binding protein 1                                                       | -2,57 | 0,58 | 3,31 |
| 213362_at    | 5789   | PTPRD    | protein tyrosine phosphatase, receptor type, D                                                    | -2,57 | 0,52 | 3,31 |
| 202638_s_at  | 3383   | ICAM1    | intercellular adhesion molecule 1 (CD54), human rhinovirus receptor                               | -2,57 | 0,53 | 3,31 |
| 207391_s_at  | 8394   | PIP5K1A  | phosphatidylinositol-4-phosphate 5-kinase, type I, alpha                                          | -2,57 | 0,59 | 3,31 |
| 201879_at    | 25820  | ARIH1    | ariadne homolog, ubiquitin-conjugating enzyme E2 binding protein, 1 (Drosophila)                  | -2,56 | 0,55 | 3,31 |
| 204224_s_at  | 2643   | GCH1     | GTP cyclohydrolase 1 (dopa-responsive dystonia)                                                   | -2,56 | 0,52 | 3,31 |
| 23--127_at   | --     | --       | --                                                                                                | -2,56 | 0,45 | 3,31 |
| 227746_at    | 1994   | ELAVL1   | ELAV (embryonic lethal, abnormal vision, Drosophila)-like 1 (Hu antigen R)                        | -2,56 | 0,50 | 3,31 |
| 217026_at    | 1080   | CFTR     | cystic fibrosis transmembrane conductance regulator (ATP-binding cassette sub-family C, member 7) | -2,56 | 0,59 | 3,31 |
| 216623_x_at  | 27324  | TOX3     | TOX high mobility group box family member 3                                                       | -2,56 | 0,53 | 3,31 |
| 219017_at    | 55500  | ETNK1    | ethanolamine kinase 1                                                                             | -2,56 | 0,64 | 3,31 |
| 221750_at    | 3157   | HMGCS1   | 3-hydroxy-3-methylglutaryl-Coenzyme A synthase 1 (soluble)                                        | -2,56 | 0,58 | 3,31 |
| 201464_x_at  | 3725   | JUN      | jun oncogene                                                                                      | -2,56 | 0,52 | 3,31 |
| 241751_at    | 8481   | OFD1     | oral-facial-digital syndrome 1                                                                    | -2,56 | 0,57 | 3,31 |
| 218096_at    | 55326  | AGPAT5   | 1-acylglycerol-3-phosphate O-acyltransferase 5 (lysophosphatidic acid acyltransferase, epsilon)   | -2,56 | 0,61 | 3,31 |

|                  |        |          |                                                                                         |       |      |      |
|------------------|--------|----------|-----------------------------------------------------------------------------------------|-------|------|------|
| 213172_at        | 23508  | TTC9     | tetratricopeptide repeat domain 9                                                       | -2,56 | 0,51 | 3,31 |
| 228293_at        | 91614  | DEPDC7   | DEP domain containing 7                                                                 | -2,56 | 0,44 | 3,31 |
| 238756_at        | --     | --       | --                                                                                      | -2,56 | 0,57 | 3,31 |
| 230733_at        | 10627  | MRCL3    | myosin regulatory light chain MRCL3                                                     | -2,56 | 0,51 | 3,31 |
| 203803_at        | 51449  | PCYOX1   | prenylcysteine oxidase 1                                                                | -2,56 | 0,48 | 3,31 |
| 213654_at        | 27097  | TAF5L    | TAF5-like RNA polymerase II, p300/CBP-associated factor (PCAF)-associated factor, 65kDa | -2,56 | 0,64 | 3,31 |
| 1554462_a_a<br>t | 4189   | DNAJB9   | DnaJ (Hsp40) homolog, subfamily B, member 9                                             | -2,56 | 0,61 | 3,31 |
| 239423_at        | --     | --       | --                                                                                      | -2,56 | 0,63 | 3,31 |
| 201920_at        | 6574   | SLC20A1  | solute carrier family 20 (phosphate transporter), member 1                              | -2,55 | 0,57 | 3,31 |
| 233155_at        | 151531 | UPP2     | uridine phosphorylase 2                                                                 | -2,55 | 0,51 | 3,31 |
| 225239_at        | --     | --       | --                                                                                      | -2,55 | 0,57 | 3,31 |
| 1555977_at       | --     | --       | --                                                                                      | -2,55 | 0,52 | 3,31 |
| 226516_at        | 126321 | C19orf28 | chromosome 19 open reading frame 28                                                     | -2,55 | 0,48 | 3,31 |
| 32091_at         | 9673   | SLC25A44 | solute carrier family 25, member 44                                                     | -2,55 | 0,60 | 3,31 |
| 205874_at        | 3706   | ITPKA    | inositol 1,4,5-trisphosphate 3-kinase A                                                 | -2,55 | 0,55 | 3,31 |
| 233769_at        | --     | --       | --                                                                                      | -2,55 | 0,60 | 3,31 |
| 236515_at        | 55291  | SAPS3    | SAPS domain family, member 3                                                            | -2,55 | 0,50 | 3,31 |
| 1555--31_at      | --     | --       | --                                                                                      | -2,55 | 0,52 | 3,31 |
| 1569183_a_a<br>t | 1121   | CHM      | choroideremia (Rab escort protein 1)                                                    | -2,55 | 0,58 | 3,31 |
| 212231_at        | 23014  | FBXO21   | F-box protein 21                                                                        | -2,55 | 0,61 | 3,31 |
| 209896_s_at      | 5781   | PTPN11   | protein tyrosine phosphatase, non-receptor type 11 (Noonan syndrome 1)                  | -2,55 | 0,53 | 3,31 |
| 243371_at        | --     | --       | --                                                                                      | -2,55 | 0,55 | 3,31 |
| 156317--_at      | --     | --       | --                                                                                      | -2,55 | 0,43 | 3,31 |
| 212522_at        | 5151   | PDE8A    | phosphodiesterase 8A                                                                    | -2,55 | 0,61 | 3,31 |
| 227341_at        | 222389 | C10orf30 | chromosome 10 open reading frame 30                                                     | -2,55 | 0,60 | 3,31 |
| 235024_at        | 79960  | PHF17    | PHD finger protein 17                                                                   | -2,54 | 0,57 | 3,31 |
| 1552879_a_a<br>t | 220202 | ATOH7    | atonal homolog 7 (Drosophila)                                                           | -2,54 | 0,49 | 3,31 |
| 206643_at        | 3034   | HAL      | histidine ammonia-lyase                                                                 | -2,54 | 0,46 | 3,31 |

|             |        |          |                                                                                          |       |      |      |
|-------------|--------|----------|------------------------------------------------------------------------------------------|-------|------|------|
| 241897_at   | 11030  | RBPM5    | RNA binding protein with multiple splicing                                               | -2,54 | 0,52 | 3,31 |
| 218000_s_at | 22822  | PHLDA1   | pleckstrin homology-like domain, family A, member 1                                      | -2,54 | 0,47 | 3,31 |
| 2361--4_at  | --     | --       | --                                                                                       | -2,54 | 0,61 | 3,31 |
| 233463_at   | 166824 | RASSF6   | Ras association (RalGDS/AF-6) domain family 6                                            | -2,54 | 0,52 | 3,31 |
| 210974_s_at | 8943   | AP3D1    | adaptor-related protein complex 3, delta 1 subunit                                       | -2,54 | 0,60 | 3,31 |
| 204277_s_at | 7084   | TK2      | thymidine kinase 2, mitochondrial                                                        | -2,54 | 0,61 | 3,31 |
| 222643_s_at | 582    | BBS1     | Bardet-Biedl syndrome 1                                                                  | -2,54 | 0,55 | 3,31 |
| 224978_s_at | 57602  | USP36    | ubiquitin specific peptidase 36                                                          | -2,54 | 0,58 | 3,31 |
| 221901_at   | 85352  | KIAA1644 | KIAA1644 protein                                                                         | -2,54 | 0,41 | 3,31 |
| 226261_at   | 223082 | ZNRF2    | zinc and ring finger 2                                                                   | -2,54 | 0,61 | 3,31 |
| 219429_at   | 79152  | FA2H     | fatty acid 2-hydroxylase                                                                 | -2,54 | 0,49 | 3,31 |
| 237029_at   | 3081   | HGD      | homogentisate 1,2-dioxygenase (homogentisate oxidase)                                    | -2,54 | 0,54 | 3,31 |
| 15561--5_at | --     | --       | --                                                                                       | -2,53 | 0,56 | 3,31 |
| 203949_at   | 4353   | MPO      | myeloperoxidase                                                                          | -2,53 | 0,62 | 3,31 |
| 212976_at   | 23507  | LRR8B    | leucine rich repeat containing 8 family, member B                                        | -2,53 | 0,51 | 3,31 |
| 215314_at   | 288    | ANK3     | ankyrin 3, node of Ranvier (ankyrin G)                                                   | -2,53 | 0,54 | 3,31 |
| 203676_at   | 2799   | GNS      | glucosamine (N-acetyl)-6-sulfatase (Sanfilippo disease IIID)                             | -2,53 | 0,60 | 3,31 |
| 201585_s_at | 6421   | SFPQ     | splicing factor proline/glutamine-rich (polypyrimidine tract binding protein associated) | -2,53 | 0,54 | 3,31 |
| 231777_at   | 1460   | CSNK2B   | casein kinase 2, beta polypeptide                                                        | -2,53 | 0,59 | 3,31 |
| 24--43--_at | --     | --       | --                                                                                       | -2,53 | 0,57 | 3,31 |
| 1565738_at  | --     | --       | --                                                                                       | -2,53 | 0,48 | 3,31 |
| 1556865_at  | 11252  | PACSIN2  | protein kinase C and casein kinase substrate in neurons 2                                | -2,53 | 0,48 | 3,31 |
| 213658_at   | 374655 | ZNF710   | zinc finger protein 710                                                                  | -2,53 | 0,56 | 3,31 |
| 212171_x_at | 7422   | VEGFA    | vascular endothelial growth factor A                                                     | -2,53 | 0,52 | 3,31 |
| 202059_s_at | 3836   | KPNA1    | karyopherin alpha 1 (importin alpha 5)                                                   | -2,53 | 0,64 | 3,31 |

|              |        |          |                                                                           |       |      |      |
|--------------|--------|----------|---------------------------------------------------------------------------|-------|------|------|
| 229494_s_at  | 7262   | PHLDA2   | pleckstrin homology-like domain, family A, member 2                       | -2,53 | 0,44 | 3,31 |
| 244814_at    | 56886  | UGCGL1   | UDP-glucose ceramide glucosyltransferase-like 1                           | -2,53 | 0,57 | 3,31 |
| 226920_at    | 1452   | CSNK1A1  | casein kinase 1, alpha 1                                                  | -2,53 | 0,60 | 3,31 |
| 230001_at    | 92979  | MARCH9   | membrane-associated ring finger (C3HC4) 9                                 | -2,53 | 0,50 | 3,31 |
| 241944_x_at  | 7132   | TNFRSF1A | tumor necrosis factor receptor superfamily, member 1A                     | -2,53 | 0,52 | 3,31 |
| 1569020_at   | 4739   | NEDD9    | neural precursor cell expressed, developmentally down-regulated 9         | -2,53 | 0,57 | 3,31 |
| 224792_at    | 85456  | TNKS1BP1 | tankyrase 1 binding protein 1, 182kDa                                     | -2,53 | 0,51 | 3,31 |
| 236972_at    | 84676  | TRIM63   | tripartite motif-containing 63                                            | -2,53 | 0,53 | 3,31 |
| 223780_s_at  | 9969   | THRAP1   | thyroid hormone receptor associated protein 1                             | -2,53 | 0,53 | 3,31 |
| 226998_at    | 80155  | NARG1    | NMDA receptor regulated 1                                                 | -2,52 | 0,62 | 3,31 |
| 1554068_s_at | 144577 | FLJ32549 | hypothetical protein FLJ32549                                             | -2,52 | 0,57 | 3,31 |
| 236274_at    | 8662   | EIF3S9   | eukaryotic translation initiation factor 3, subunit 9 eta, 116kDa         | -2,52 | 0,51 | 3,31 |
| 242330_at    | 153129 | FLJ90709 | hypothetical protein FLJ90709                                             | -2,52 | 0,60 | 3,31 |
| 219554_at    | 51458  | RHCG     | Rh family, C glycoprotein                                                 | -2,52 | 0,50 | 3,31 |
| 1553106_at   | 134553 | C5orf24  | chromosome 5 open reading frame 24                                        | -2,52 | 0,68 | 3,31 |
| 201143_s_at  | 1965   | EIF2S1   | eukaryotic translation initiation factor 2, subunit 1 alpha, 35kDa        | -2,52 | 0,56 | 3,31 |
| 1552423_at   | 2117   | ETV3     | ets variant gene 3                                                        | -2,52 | 0,44 | 3,31 |
| 214721_x_at  | 23580  | CDC42EP4 | CDC42 effector protein (Rho GTPase binding) 4                             | -2,52 | 0,61 | 3,31 |
| 212951_at    | 221395 | GPR116   | G protein-coupled receptor 116                                            | -2,52 | 0,47 | 3,31 |
| 205837_s_at  | 2993   | GYPA     | glycophorin A (MNS blood group)                                           | -2,52 | 0,44 | 3,31 |
| 201510_at    | 1999   | ELF3     | E74-like factor 3 (ets domain transcription factor, epithelial-specific ) | -2,52 | 0,54 | 3,31 |
| 208786_s_at  | 81631  | MAP1LC3B | microtubule-associated protein 1 light chain 3 beta                       | -2,52 | 0,64 | 3,31 |
| 212436_at    | 51592  | TRIM33   | tripartite motif-containing 33                                            | -2,52 | 0,60 | 3,31 |

|             |                   |                      |                                                                         |       |      |      |
|-------------|-------------------|----------------------|-------------------------------------------------------------------------|-------|------|------|
| 203016_s_at | 117178            | SSX2IP               | synovial sarcoma, X breakpoint 2 interacting protein                    | -2,52 | 0,62 | 3,31 |
| 207200_at   | 5009              | OTC                  | ornithine carbamoyltransferase                                          | -2,52 | 0,54 | 3,31 |
| 216839_at   | 132612            | ADAD1                | adenosine deaminase domain containing 1 (testis-specific)               | -2,52 | 0,62 | 3,31 |
| 202796_at   | 11346             | SYNPO                | synaptopodin                                                            | -2,52 | 0,56 | 3,31 |
| 236712_at   | --                | --                   | --                                                                      | -2,52 | 0,56 | 3,31 |
| 230102_at   | 2119              | ETV5                 | ets variant gene 5 (ets-related molecule)                               | -2,52 | 0,57 | 3,31 |
| 237222_at   | --                | --                   | --                                                                      | -2,52 | 0,56 | 3,31 |
| 229242_at   | --                | --                   | --                                                                      | -2,52 | 0,55 | 3,31 |
| 217437_s_at | 6867              | TACC1                | transforming, acidic coiled-coil containing protein 1                   | -2,51 | 0,57 | 3,31 |
| 243026_x_at | 331               | BIRC4                | baculoviral IAP repeat-containing 4                                     | -2,51 | 0,53 | 3,31 |
| 201810_s_at | 9467              | SH3BP5               | SH3-domain binding protein 5 (BTK-associated)                           | -2,51 | 0,50 | 3,31 |
| 200776_s_at | 151579//<br>/9689 | LOC151579///<br>BZW1 | similar to basic leucine zipper and W2 domains 1///<br>and W2 domains 1 | -2,51 | 0,61 | 3,31 |
| 238885_at   | 57670             | KIAA1549             | KIAA1549 protein                                                        | -2,51 | 0,59 | 3,31 |
| 233971_at   | 401565            | LOC401565            | similar to 4931415M17 protein                                           | -2,51 | 0,56 | 3,31 |
| 209301_at   | 760               | CA2                  | carbonic anhydrase II                                                   | -2,51 | 0,62 | 3,31 |
| 223541_at   | 3038              | HAS3                 | hyaluronan synthase 3                                                   | -2,51 | 0,52 | 3,31 |
| 229091_s_at | 54619             | CCNJ                 | cyclin J                                                                | -2,51 | 0,66 | 3,31 |
| 206183_s_at | 8916              | HERC3                | hect domain and RLD 3                                                   | -2,51 | 0,61 | 3,31 |
| 236370_at   | 57154             | SMURF1               | SMAD specific E3 ubiquitin protein ligase 1                             | -2,51 | 0,55 | 3,31 |
| 213230_at   | 30850             | CDR2L                | cerebellar degeneration-related protein 2-like                          | -2,51 | 0,64 | 3,31 |
| 1569512_at  | 6840              | SVIL                 | supervillin                                                             | -2,51 | 0,54 | 3,31 |
| 40560_at    | 6909              | TBX2                 | T-box 2                                                                 | -2,51 | 0,53 | 3,31 |
| 230965_at   | 9099              | USP2                 | ubiquitin specific peptidase 2                                          | -2,51 | 0,49 | 3,31 |
| 226249_at   | 401548            | SNX30                | sorting nexin family member 30                                          | -2,51 | 0,59 | 3,31 |
| 1554085_at  | 317781            | DDX51                | DEAD (Asp-Glu-Ala-Asp) box polypeptide 51                               | -2,51 | 0,54 | 3,31 |
| 212504_at   | 22982             | DIP2C                | DIP2 disco-interacting protein 2 homolog C (Drosophila)                 | -2,51 | 0,60 | 3,31 |



|              |        |           |                                                                                       |       |      |      |
|--------------|--------|-----------|---------------------------------------------------------------------------------------|-------|------|------|
| 232080_at    | 57520  | HECW2     | HECT, C2 and WW domain containing E3 ubiquitin protein ligase 2                       | -2,51 | 0,55 | 3,31 |
| 202150_s_at  | 4739   | NEDD9     | neural precursor cell expressed, developmentally down-regulated 9                     | -2,50 | 0,51 | 3,31 |
| 226929_at    | 4524   | MTHFR     | 5,10-methylenetetrahydrofolate reductase (NADPH)                                      | -2,50 | 0,51 | 3,31 |
| 242116_x_at  | 26057  | ANKRD17   | ankyrin repeat domain 17                                                              | -2,50 | 0,54 | 3,31 |
| 1563549_a_at | 57719  | TMEM16H   | transmembrane protein 16H                                                             | -2,50 | 0,59 | 3,31 |
| 208992_s_at  | 6774   | STAT3     | signal transducer and activator of transcription 3 (acute-phase response factor)      | -2,50 | 0,53 | 3,31 |
| 225267_at    | 3840   | KPNA4     | karyopherin alpha 4 (importin alpha 3)                                                | -2,50 | 0,62 | 3,31 |
| 221268_s_at  | 81537  | SGPP1     | sphingosine-1-phosphate phosphatase 1                                                 | -2,50 | 0,51 | 3,31 |
| 240150_at    | 54165  | DCUN1D1   | DCN1, defective in cullin neddylation 1, domain containing 1 ( <i>S. cerevisiae</i> ) | -2,50 | 0,50 | 3,31 |
| 239283_at    | 50999  | TMED5     | transmembrane emp24 protein transport domain containing 5                             | -2,50 | 0,57 | 3,31 |
| 232295_at    | 85476  | GFM1      | G elongation factor, mitochondrial 1                                                  | -2,50 | 0,62 | 3,31 |
| 215706_x_at  | 7791   | ZYX       | zyxin                                                                                 | -2,50 | 0,62 | 3,31 |
| 208868_s_at  | 23710  | GABARAPL1 | GABA(A) receptor-associated protein like 1                                            | -2,50 | 0,60 | 3,31 |
| 214207_s_at  | 29775  | CARD10    | caspase recruitment domain family, member 10                                          | -2,50 | 0,56 | 3,31 |
| 226872_at    | 5990   | RFX2      | regulatory factor X, 2 (influences HLA class II expression)                           | -2,50 | 0,46 | 3,31 |
| 213478_at    | 23254  | KIAA1026  | kazrin                                                                                | -2,50 | 0,52 | 3,31 |
| 221123_x_at  | 55893  | ZNF395    | zinc finger protein 395                                                               | -2,50 | 0,46 | 3,31 |
| 1553722_s_at | 220441 | RNF152    | ring finger protein 152                                                               | -2,50 | 0,45 | 3,31 |
| 205288_at    | 8556   | CDC14A    | CDC14 cell division cycle 14 homolog A ( <i>S. cerevisiae</i> )                       | -2,50 | 0,56 | 3,31 |
| 230112_at    | 57574  | MARCH4    | membrane-associated ring finger (C3HC4) 4                                             | -2,49 | 0,51 | 3,31 |
| 222409_at    | 23603  | CORO1C    | coronin, actin binding protein, 1C                                                    | -2,49 | 0,64 | 3,31 |
| 205862_at    | 9687   | GREB1     | GREB1 protein                                                                         | -2,49 | 0,42 | 3,31 |
| 241535_at    | --     | --        | --                                                                                    | -2,49 | 0,50 | 3,31 |
| 230416_at    | 6571   | SLC18A2   | solute carrier family 18 (vesicular monoamine), member 2                              | -2,49 | 0,52 | 3,31 |

|             |       |           |                                                                                |       |      |      |
|-------------|-------|-----------|--------------------------------------------------------------------------------|-------|------|------|
| 1565613_at  | --    | --        | --                                                                             | -2,49 | 0,64 | 3,31 |
| 203349_s_at | 2119  | ETV5      | ets variant gene 5 (ets-related molecule)                                      | -2,49 | 0,58 | 3,31 |
| 204177_s_at | 27252 | KLHL20    | kelch-like 20 (Drosophila)                                                     | -2,49 | 0,65 | 3,31 |
| 208275_x_at | 8433  | UTF1      | undifferentiated embryonic cell transcription factor 1                         | -2,49 | 0,53 | 3,31 |
| 205211_s_at | 9610  | RIN1      | Ras and Rab interactor 1                                                       | -2,49 | 0,55 | 3,31 |
| 216603_at   | 23428 | SLC7A8    | solute carrier family 7 (cationic amino acid transporter, y+ system), member 8 | -2,49 | 0,50 | 3,31 |
| 234751_s_at | 54413 | NLGN3     | neuroligin 3                                                                   | -2,49 | 0,66 | 3,31 |
| 2128-6_at   | --    | --        | --                                                                             | -2,49 | 0,63 | 3,31 |
| 209294_x_at | 8795  | TNFRSF10B | tumor necrosis factor receptor superfamily, member 10b                         | -2,49 | 0,53 | 3,31 |
| 216445_at   | 7799  | PRDM2     | PR domain containing 2, with ZNF domain                                        | -2,49 | 0,53 | 3,31 |
| 226580_at   | 84312 | BRMS1L    | breast cancer metastasis-suppressor 1-like                                     | -2,49 | 0,63 | 3,31 |
| 225859_at   | 331   | BIRC4     | baculoviral IAP repeat-containing 4                                            | -2,49 | 0,63 | 3,31 |
| 231-69_at   | --    | --        | --                                                                             | -2,49 | 0,60 | 3,31 |
| 239067_s_at | 56666 | PANX2     | pannexin 2                                                                     | -2,49 | 0,57 | 3,31 |
| 207621_s_at | 10400 | PEMT      | phosphatidylethanolamine N-methyltransferase                                   | -2,49 | 0,55 | 3,31 |
| 202146_at   | 3475  | IFRD1     | interferon-related developmental regulator 1                                   | -2,48 | 0,58 | 3,31 |
| 227547_at   | --    | --        | --                                                                             | -2,48 | 0,60 | 3,31 |
| 227177_at   | --    | --        | --                                                                             | -2,48 | 0,44 | 3,31 |
| 228932_at   | --    | --        | --                                                                             | -2,48 | 0,65 | 3,31 |
| 203411_s_at | 4000  | LMNA      | lamin A/C                                                                      | -2,48 | 0,58 | 3,31 |
| 234290_x_at | 79784 | MYH14     | myosin, heavy chain 14                                                         | -2,48 | 0,57 | 3,31 |
| 215108_x_at | 27324 | TOX3      | TOX high mobility group box family member 3                                    | -2,48 | 0,54 | 3,31 |
| 217519_at   | 23499 | MACF1     | microtubule-actin crosslinking factor 1                                        | -2,48 | 0,55 | 3,31 |
| 217628_at   | 53405 | CLIC5     | chloride intracellular channel 5                                               | -2,48 | 0,49 | 3,31 |
| 202877_s_at | 22918 | CD93      | CD93 molecule                                                                  | -2,48 | 0,56 | 3,31 |
| 224728_at   | 64756 | ATPAF1    | ATP synthase mitochondrial F1 complex assembly factor 1                        | -2,48 | 0,63 | 3,31 |
| 224097_s_at | 50848 | F11R      | F11 receptor                                                                   | -2,48 | 0,65 | 3,31 |

|              |        |                   |                                                                                        |       |      |      |
|--------------|--------|-------------------|----------------------------------------------------------------------------------------|-------|------|------|
| 35147_at     | 23263  | MCF2L             | MCF.2 cell line derived transforming sequence-like                                     | -2,48 | 0,56 | 3,31 |
| 214891_at    | 23014  | FBXO21            | F-box protein 21                                                                       | -2,48 | 0,47 | 3,81 |
| 243322_at    | 1809   | DPYSL3            | dihydropyrimidinase-like 3                                                             | -2,48 | 0,55 | 3,81 |
| 212225_at    | 10209  | EIF1              | eukaryotic translation initiation factor 1                                             | -2,48 | 0,49 | 3,81 |
| 244054_at    | 6498   | SKIL              | SKI-like oncogene                                                                      | -2,48 | 0,55 | 3,81 |
| 230285_at    | 258010 | DKFZp313A24<br>32 | hypothetical protein DKFZp313A2432                                                     | -2,48 | 0,59 | 3,81 |
| 223598_at    | 5887   | RAD23B            | RAD23 homolog B ( <i>S. cerevisiae</i> )                                               | -2,48 | 0,63 | 3,81 |
| 224325_at    | 8325   | FZD8              | frizzled homolog 8 ( <i>Drosophila</i> )                                               | -2,48 | 0,63 | 3,81 |
| 205876_at    | 3977   | LIFR              | leukemia inhibitory factor receptor alpha                                              | -2,47 | 0,62 | 3,81 |
| 236476_at    | --     | --                | --                                                                                     | -2,47 | 0,57 | 3,81 |
| 202423_at    | 7994   | MYST3             | MYST histone acetyltransferase (monocytic leukemia) 3                                  | -2,47 | 0,64 | 3,81 |
| 200919_at    | 1912   | PHC2              | polyhomeotic homolog 2 ( <i>Drosophila</i> )                                           | -2,47 | 0,59 | 3,81 |
| 224642_at    | 84248  | FYTTD1            | forty-two-three domain containing 1                                                    | -2,47 | 0,49 | 3,81 |
| 204404_at    | 6558   | SLC12A2           | solute carrier family 12 (sodium/potassium/chloride transporters), member 2            | -2,47 | 0,55 | 3,81 |
| 242600_at    | 257019 | FRMD3             | FERM domain containing 3                                                               | -2,47 | 0,54 | 3,81 |
| 203071_at    | 7869   | SEMA3B            | sema domain, immunoglobulin domain (Ig), short basic domain, secreted, (semaphorin) 3B | -2,47 | 0,47 | 3,81 |
| 1554333_at   | 55466  | DNAJA4            | DnaJ (Hsp40) homolog, subfamily A, member 4                                            | -2,47 | 0,58 | 3,81 |
| 212641_at    | 3097   | HIVEP2            | human immunodeficiency virus type I enhancer binding protein 2                         | -2,47 | 0,52 | 3,81 |
| 214785_at    | 23230  | VPS13A            | vacuolar protein sorting 13 homolog A ( <i>S. cerevisiae</i> )                         | -2,47 | 0,59 | 3,81 |
| 239901_at    | 378805 | FLJ43663          | hypothetical protein FLJ43663                                                          | -2,47 | 0,55 | 3,81 |
| 215876_at    | 19     | ABCA1             | ATP-binding cassette, sub-family A (ABC1), member 1                                    | -2,47 | 0,56 | 3,81 |
| 1558511_s_at | 57488  | FAM62B            | family with sequence similarity 62 (C2 domain containing) member B                     | -2,47 | 0,61 | 3,81 |

|                  |        |           |                                                                              |       |      |      |
|------------------|--------|-----------|------------------------------------------------------------------------------|-------|------|------|
| 211442_x_at      | 64816  | CYP3A43   | cytochrome P450, family 3, subfamily A, polypeptide 43                       | -2,47 | 0,46 | 3,81 |
| 24--373_at       | --     | --        | --                                                                           | -2,47 | 0,55 | 3,81 |
| 2--9446_s_at     | --     | --        | --                                                                           | -2,47 | 0,51 | 3,81 |
| 225922_at        | 152940 | FLJ25371  | hypothetical protein FLJ25371                                                | -2,47 | 0,64 | 3,81 |
| 219520_s_at      | 55841  | WWC3      | WWC family member 3                                                          | -2,47 | 0,60 | 3,81 |
| 239031_at        | 6752   | SSTR2     | somatostatin receptor 2                                                      | -2,47 | 0,55 | 3,81 |
| 209298_s_at      | 6453   | ITSN1     | intersectin 1 (SH3 domain protein)                                           | -2,47 | 0,60 | 3,81 |
| 1557326_at       | --     | --        | --                                                                           | -2,47 | 0,51 | 3,81 |
| 230645_at        | 257019 | FRMD3     | FERM domain containing 3                                                     | -2,47 | 0,55 | 3,81 |
| 222006_at        | 2261   | FGFR3     | fibroblast growth factor receptor 3 (achondroplasia, thanatophoric dwarfism) | -2,47 | 0,59 | 3,81 |
| 242439_s_at      | --     | --        | --                                                                           | -2,47 | 0,54 | 3,81 |
| 212086_x_at      | 4000   | LMNA      | lamin A/C                                                                    | -2,47 | 0,62 | 3,81 |
| 1552514_at       | 164684 | WBP2NL    | WBP2 N-terminal like                                                         | -2,46 | 0,53 | 3,81 |
| 226669_at        | --     | --        | --                                                                           | -2,46 | 0,65 | 3,81 |
| 1562--49_at      | --     | --        | --                                                                           | -2,46 | 0,55 | 3,81 |
| 227237_x_at      | 83858  | ATAD3B    | ATPase family, AAA domain containing 3B                                      | -2,46 | 0,49 | 3,81 |
| 223778_at        | 64147  | KIF9      | kinesin family member 9                                                      | -2,46 | 0,61 | 3,81 |
| 215185_at        | --     | --        | --                                                                           | -2,46 | 0,52 | 3,81 |
| 1552272_a_a<br>t | 163154 | MGC24975  | hypothetical protein MGC24975                                                | -2,46 | 0,52 | 3,81 |
| 244649_at        | --     | --        | --                                                                           | -2,46 | 0,56 | 3,81 |
| 209295_at        | 8795   | TNFRSF10B | tumor necrosis factor receptor superfamily, member 10b                       | -2,46 | 0,61 | 3,81 |
| 231321_s_at      | 55331  | PHCA      | phytoceramidase, alkaline                                                    | -2,46 | 0,54 | 3,81 |
| 242394_at        | 154043 | CNKSR3    | CNKSR family member 3                                                        | -2,46 | 0,61 | 3,81 |
| 225643_at        | 93487  | C14orf32  | chromosome 14 open reading frame 32                                          | -2,46 | 0,62 | 3,81 |
| 1554449_at       | 166968 | MIER3     | mesoderm induction early response 1, family member 3                         | -2,46 | 0,52 | 3,81 |
| 239--89_at       | --     | --        | --                                                                           | -2,46 | 0,52 | 3,81 |
| 227776_at        | 55331  | PHCA      | phytoceramidase, alkaline                                                    | -2,46 | 0,64 | 3,81 |
| 209162_s_at      | 9128   | PRPF4     | PRP4 pre-mRNA processing factor 4 homolog (yeast)                            | -2,46 | 0,65 | 3,81 |

|              |        |           |                                                                            |       |      |      |
|--------------|--------|-----------|----------------------------------------------------------------------------|-------|------|------|
| 231251_at    | 147179 | WIPF2     | WAS/WASL interacting protein family, member 2                              | -2,46 | 0,51 | 3,81 |
| 241707_at    | 388630 | LOC388630 | similar to C05G5.5                                                         | -2,46 | 0,53 | 3,81 |
| 202597_at    | 3664   | IRF6      | interferon regulatory factor 6                                             | -2,46 | 0,59 | 3,81 |
| 202219_at    | 6535   | SLC6A8    | solute carrier family 6 (neurotransmitter transporter, creatine), member 8 | -2,46 | 0,50 | 3,81 |
| 225138_at    | 54764  | ZRANB1    | zinc finger, RAN-binding domain containing 1                               | -2,46 | 0,65 | 3,81 |
| 207547_s_at  | 11170  | FAM107A   | family with sequence similarity 107, member A                              | -2,46 | 0,53 | 3,81 |
| 1554807_a_at | 56907  | SPIRE1    | spire homolog 1 (Drosophila)                                               | -2,46 | 0,52 | 3,81 |
| 221752_at    | 54434  | SSH1      | slingshot homolog 1 (Drosophila)                                           | -2,46 | 0,57 | 3,81 |
| 225497_at    | 11101  | ATE1      | arginyltransferase 1                                                       | -2,45 | 0,69 | 3,81 |
| 155622--_at  | --     | --        | --                                                                         | -2,45 | 0,51 | 3,81 |
| 210177_at    | 89870  | TRIM15    | tripartite motif-containing 15                                             | -2,45 | 0,50 | 3,81 |
| 226600_at    | 160418 | TMTC3     | transmembrane and tetratricopeptide repeat containing 3                    | -2,45 | 0,65 | 3,81 |
| 207415_at    | 22925  | PLA2R1    | phospholipase A2 receptor 1, 180kDa                                        | -2,45 | 0,46 | 3,81 |
| 205972_at    | 10991  | SLC38A3   | solute carrier family 38, member 3                                         | -2,45 | 0,50 | 3,81 |
| 1565852_at   | --     | --        | --                                                                         | -2,45 | 0,56 | 3,81 |
| 203687_at    | 6376   | CX3CL1    | chemokine (C-X3-C motif) ligand 1                                          | -2,45 | 0,53 | 3,81 |
| 201535_at    | 5412   | UBL3      | ubiquitin-like 3                                                           | -2,45 | 0,66 | 3,81 |
| 235296_at    | 56648  | EIF5A2    | eukaryotic translation initiation factor 5A2                               | -2,45 | 0,56 | 3,81 |
| 239816_at    | --     | --        | --                                                                         | -2,45 | 0,54 | 3,81 |
| 1566472_s_at | 54884  | RETSAT    | retinol saturase (all-trans-retinol 13,14-reductase)                       | -2,45 | 0,53 | 3,81 |
| 213705_at    | 4144   | MAT2A     | methionine adenosyltransferase II, alpha                                   | -2,45 | 0,68 | 3,81 |
| 227228_s_at  | 440193 | CCDC88C   | coiled-coil domain containing 88C                                          | -2,45 | 0,53 | 3,81 |
| 227102_at    | 23087  | TRIM35    | tripartite motif-containing 35                                             | -2,45 | 0,59 | 3,81 |
| 203934_at    | 3791   | KDR       | kinase insert domain receptor (a type III receptor tyrosine kinase)        | -2,45 | 0,56 | 3,81 |
| 220386_s_at  | 27436  | EML4      | echinoderm microtubule associated protein like 4                           | -2,45 | 0,58 | 3,81 |
| 204736_s_at  | 1464   | CSPG4     | chondroitin sulfate proteoglycan 4                                         | -2,45 | 0,55 | 3,81 |

|              |        |              |                                                                                  |       |      |      |
|--------------|--------|--------------|----------------------------------------------------------------------------------|-------|------|------|
| 231980_at    | 220164 | DOK6         | docking protein 6                                                                | -2,45 | 0,54 | 3,81 |
| 230398_at    | 84951  | TNS4         | tensin 4                                                                         | -2,45 | 0,55 | 3,81 |
| 222900_at    | 56675  | NRIP3        | nuclear receptor interacting protein 3                                           | -2,45 | 0,54 | 3,81 |
| 238537_at    | 767    | CA8          | carbonic anhydrase VIII                                                          | -2,45 | 0,50 | 3,81 |
| 216230_x_at  | 6609   | SMPD1        | sphingomyelin phosphodiesterase 1, acid lysosomal (acid sphingomyelinase)        | -2,45 | 0,54 | 3,81 |
| 235641_at    | 10221  | TRIB1        | tribbles homolog 1 (Drosophila)                                                  | -2,45 | 0,49 | 3,81 |
| 1559623_at   | 28970  | C11orf54     | chromosome 11 open reading frame 54                                              | -2,45 | 0,54 | 3,81 |
| 226682_at    | 283666 | LOC283666    | hypothetical protein LOC283666                                                   | -2,45 | 0,66 | 3,81 |
| 241968_at    | --     | --           | --                                                                               | -2,45 | 0,65 | 3,81 |
| 224773_at    | 89796  | NAV1         | neuron navigator 1                                                               | -2,44 | 0,59 | 3,81 |
| 1556113_at   | 400169 | DKFZp451A211 | DKFZp451A211 protein                                                             | -2,44 | 0,62 | 3,81 |
| 225448_at    | 8774   | NAPG         | N-ethylmaleimide-sensitive factor attachment protein, gamma                      | -2,44 | 0,63 | 3,81 |
| 229841_at    | 27161  | EIF2C2       | eukaryotic translation initiation factor 2C, 2                                   | -2,44 | 0,50 | 3,81 |
| 216817_s_at  | 26716  | OR2H1        | olfactory receptor, family 2, subfamily H, member 1                              | -2,44 | 0,55 | 3,81 |
| 216269_s_at  | 2006   | ELN          | elastin (supravalvular aortic stenosis, Williams-Beuren syndrome)                | -2,44 | 0,56 | 3,81 |
| 203108_at    | 9052   | GPRC5A       | G protein-coupled receptor, family C, group 5, member A                          | -2,44 | 0,52 | 3,81 |
| 1558365_at   | --     | --           | --                                                                               | -2,44 | 0,55 | 3,81 |
| 1553935_at   | 85003  | MGC2848      | hypothetical protein MGC2848                                                     | -2,44 | 0,60 | 3,81 |
| 201148_s_at  | 7078   | TIMP3        | TIMP metalloproteinase inhibitor 3 (Sorsby fundus dystrophy, pseudoinflammatory) | -2,44 | 0,57 | 3,81 |
| 218517_at    | --     | --           | --                                                                               | -2,44 | 0,64 | 3,81 |
| 212683_at    | 9673   | SLC25A44     | solute carrier family 25, member 44                                              | -2,44 | 0,63 | 3,81 |
| 236797_at    | 6385   | SDC4         | syndecan 4                                                                       | -2,44 | 0,48 | 3,81 |
| 1559879_a_at | --     | --           | --                                                                               | -2,44 | 0,63 | 3,81 |
| 823_at       | 6376   | CX3CL1       | chemokine (C-X3-C motif) ligand 1                                                | -2,44 | 0,54 | 3,81 |
| 230499_at    | 330    | BIRC3        | baculoviral IAP repeat-containing 3                                              | -2,44 | 0,53 | 3,81 |
| 201333_s_at  | 23365  | ARHGEF12     | Rho guanine nucleotide exchange factor (GEF) 12                                  | -2,44 | 0,59 | 3,81 |

|                    |        |           |                                                                                                          |       |      |      |
|--------------------|--------|-----------|----------------------------------------------------------------------------------------------------------|-------|------|------|
| 219937_at          | 29953  | TRHDE     | thyrotropin-releasing hormone degrading enzyme                                                           | -2,43 | 0,64 | 3,81 |
| 210871_x_at        | 117178 | SSX2IP    | synovial sarcoma, X breakpoint 2 interacting protein                                                     | -2,43 | 0,58 | 3,81 |
| 217279_x_at        | 4323   | MMP14     | matrix metalloproteinase 14 (membrane-inserted)                                                          | -2,43 | 0,56 | 3,81 |
| 224956_at          | 57532  | NUFIP2    | nuclear fragile X mental retardation protein interacting protein 2                                       | -2,43 | 0,56 | 3,81 |
| 209559_at          | 9026   | HIP1R     | huntingtin interacting protein 1 related                                                                 | -2,43 | 0,56 | 3,81 |
| 1558002_at         | 11171  | STRAP     | serine/threonine kinase receptor associated protein                                                      | -2,43 | 0,58 | 3,81 |
| 227599_at          | 151963 | C3orf59   | chromosome 3 open reading frame 59                                                                       | -2,43 | 0,58 | 3,81 |
| 222449_at          | 56937  | TMEPAI    | transmembrane, prostate androgen induced RNA                                                             | -2,43 | 0,60 | 3,81 |
| 220468_at          | 80117  | ARL14     | ADP-ribosylation factor-like 14                                                                          | -2,43 | 0,50 | 3,81 |
| 200995_at          | 10527  | IPO7      | importin 7                                                                                               | -2,43 | 0,66 | 3,81 |
| 206257_at          | 26093  | CCDC9     | coiled-coil domain containing 9                                                                          | -2,43 | 0,56 | 3,81 |
| 227361_at          | --     | --        | --                                                                                                       | -2,43 | 0,53 | 3,81 |
| 1561281_a_a<br>t   | 284576 | LOC284576 | hypothetical protein LOC284576                                                                           | -2,43 | 0,55 | 3,81 |
| 1554690_a_a<br>t   | 6867   | TACC1     | transforming, acidic coiled-coil containing protein 1                                                    | -2,43 | 0,52 | 3,81 |
| 237974_at          | 145447 | ABHD12B   | abhydrolase domain containing 12B                                                                        | -2,43 | 0,59 | 3,81 |
| 238909_at          | 6281   | S100A10   | S100 calcium binding protein A10                                                                         | -2,43 | 0,52 | 3,81 |
| 1562898_at         | 23250  | ATP11A    | ATPase, Class VI, type 11A                                                                               | -2,43 | 0,49 | 3,81 |
| 239809_at          | 8609   | KLF7      | Kruppel-like factor 7 (ubiquitous)                                                                       | -2,43 | 0,55 | 3,81 |
| 209810_at          | 6439   | SFTPB     | surfactant, pulmonary-associated protein B                                                               | -2,43 | 0,59 | 3,81 |
| 222349_x_at        | 376412 | RNF126P1  | ring finger protein 126 pseudogene 1                                                                     | -2,43 | 0,65 | 3,81 |
| 226687_at          | 55660  | PRPF40A   | PRP40 pre-mRNA processing factor 40 homolog A ( <i>S. cerevisiae</i> )                                   | -2,43 | 0,58 | 3,81 |
| 1556----<br>6_s_at | --     | --        | --                                                                                                       | -2,43 | 0,63 | 3,81 |
| 222033_s_at        | 2321   | FLT1      | fms-related tyrosine kinase 1 (vascular endothelial growth factor/vascular permeability factor receptor) | -2,43 | 0,57 | 3,81 |

|                     |        |          |                                                                        |       |      |      |
|---------------------|--------|----------|------------------------------------------------------------------------|-------|------|------|
| 1556758_at          | 54906  | C10orf18 | chromosome 10 open reading frame 18                                    | -2,43 | 0,60 | 3,81 |
| 236013_at           | 777    | CACNA1E  | calcium channel, voltage-dependent, R type, alpha 1E subunit           | -2,42 | 0,56 | 3,81 |
| 15658--<br>9_x_at   | --     | --       | --                                                                     | -2,42 | 0,56 | 3,81 |
| 214888_at           | 824    | CAPN2    | calpain 2, (m/II) large subunit                                        | -2,42 | 0,58 | 3,81 |
| AFFX-TrpnX-<br>M_at | #N/A   | #N/A     | #N/A                                                                   | -2,42 | 0,59 | 3,81 |
| 224829_at           | 80315  | CPEB4    | cytoplasmic polyadenylation element binding protein 4                  | -2,42 | 0,57 | 3,81 |
| 227029_at           | 283635 | C14orf24 | chromosome 14 open reading frame 24                                    | -2,42 | 0,61 | 3,81 |
| 15574--<br>3_s_at   | --     | --       | --                                                                     | -2,42 | 0,52 | 3,81 |
| 237572_at           | 133688 | UGT3A1   | UDP glycosyltransferase 3 family, polypeptide A1                       | -2,42 | 0,53 | 3,81 |
| 221411_at           | 3238   | HOXD12   | homeobox D12                                                           | -2,42 | 0,51 | 3,81 |
| 225548_at           | 57619  | SHROOM3  | shroom family member 3                                                 | -2,42 | 0,53 | 3,81 |
| 224641_at           | 84248  | FYTTD1   | forty-two-three domain containing 1                                    | -2,42 | 0,63 | 3,81 |
| 2379--8_at          | --     | --       | --                                                                     | -2,42 | 0,58 | 3,81 |
| 225820_at           | 79960  | PHF17    | PHD finger protein 17                                                  | -2,42 | 0,62 | 3,81 |
| 229232_at           | 255252 | LRRC57   | leucine rich repeat containing 57                                      | -2,42 | 0,61 | 3,81 |
| 227467_at           | 157506 | RDH10    | retinol dehydrogenase 10 (all-trans)                                   | -2,42 | 0,62 | 3,81 |
| 223378_at           | 84662  | GLIS2    | GLIS family zinc finger 2                                              | -2,42 | 0,65 | 3,81 |
| 205976_at           | 22868  | FASTKD2  | FAST kinase domains 2                                                  | -2,42 | 0,60 | 3,81 |
| 219052_at           | 79803  | HPS6     | Hermansky-Pudlak syndrome 6                                            | -2,42 | 0,64 | 3,81 |
| 202538_s_at         | 25978  | CHMP2B   | chromatin modifying protein 2B                                         | -2,42 | 0,63 | 3,81 |
| 223394_at           | 29950  | SERTAD1  | SERTA domain containing 1                                              | -2,41 | 0,54 | 3,81 |
| 213657_s_at         | 374655 | ZNF710   | zinc finger protein 710                                                | -2,41 | 0,60 | 3,81 |
| 224730_at           | 10238  | WDR68    | WD repeat domain 68                                                    | -2,41 | 0,58 | 3,81 |
| 220257_x_at         | 56001  | NXF2     | nuclear RNA export factor 2                                            | -2,41 | 0,63 | 3,81 |
| 212950_at           | 221395 | GPR116   | G protein-coupled receptor 116                                         | -2,41 | 0,58 | 3,81 |
| 221930_at           | 51533  | PHF7     | PHD finger protein 7                                                   | -2,41 | 0,55 | 3,81 |
| 217691_x_at         | 9123   | SLC16A3  | solute carrier family 16, member 3 (monocarboxylic acid transporter 4) | -2,41 | 0,51 | 3,81 |
| 1561274_at          | --     | --       | --                                                                     | -2,41 | 0,62 | 3,81 |



|               |        |             |                                                                                                      |       |      |      |
|---------------|--------|-------------|------------------------------------------------------------------------------------------------------|-------|------|------|
| 214347_s_at   | 1644   | DDC         | dopa decarboxylase (aromatic L-amino acid decarboxylase)                                             | -2,41 | 0,51 | 3,81 |
| 202522_at     | 23760  | PITPNB      | phosphatidylinositol transfer protein, beta                                                          | -2,41 | 0,64 | 3,81 |
| 209711_at     | 23169  | SLC35D1     | solute carrier family 35 (UDP-glucuronic acid/UDP-N-acetylgalactosamine dual transporter), member D1 | -2,41 | 0,52 | 3,81 |
| 23--888_at    | --     | --          | --                                                                                                   | -2,41 | 0,59 | 3,81 |
| 22838--_at    | --     | --          | --                                                                                                   | -2,41 | 0,60 | 3,81 |
| 1569003_at    | 81671  | TMEM49      | transmembrane protein 49                                                                             | -2,41 | 0,53 | 3,81 |
| 231169_at     | 200081 | TXLNA       | taxilin alpha                                                                                        | -2,41 | 0,63 | 3,81 |
| 222924_at     | 7871   | SLMAP       | sarcolemma associated protein                                                                        | -2,41 | 0,59 | 3,81 |
| 222747_s_at   | 6322   | SCML1       | sex comb on midleg-like 1 (Drosophila)                                                               | -2,41 | 0,50 | 3,81 |
| 212568_s_at   | 1737   | DLAT        | dihydrolipoamide S-acetyltransferase (E2 component of pyruvate dehydrogenase complex)                | -2,41 | 0,61 | 3,81 |
| 156--384_a_at | --     | --          | --                                                                                                   | -2,41 | 0,51 | 3,81 |
| 227613_at     | 55422  | ZNF331      | zinc finger protein 331                                                                              | -2,41 | 0,47 | 3,81 |
| 1553151_at    | 245972 | ATP6V0D2    | ATPase, H+ transporting, lysosomal 38kDa, V0 subunit d2                                              | -2,41 | 0,53 | 3,81 |
| 201656_at     | 3655   | ITGA6       | integrin, alpha 6                                                                                    | -2,41 | 0,66 | 3,81 |
| 227093_at     | 57602  | USP36       | ubiquitin specific peptidase 36                                                                      | -2,41 | 0,61 | 3,81 |
| 213918_s_at   | 25836  | NIPBL       | Nipped-B homolog (Drosophila)                                                                        | -2,40 | 0,52 | 3,81 |
| 241401_at     | 404201 | C4orf12     | chromosome 4 open reading frame 12                                                                   | -2,40 | 0,60 | 3,81 |
| 223169_s_at   | 58480  | RHOU        | ras homolog gene family, member U                                                                    | -2,40 | 0,51 | 3,81 |
| 225978_at     | 57494  | FAM80B      | family with sequence similarity 80, member B                                                         | -2,40 | 0,58 | 3,81 |
| 203894_at     | 27175  | TUBG2       | tubulin, gamma 2                                                                                     | -2,40 | 0,62 | 3,81 |
| 220102_at     | 668    | FOXL2       | forkhead box L2                                                                                      | -2,40 | 0,57 | 3,81 |
| 212528_at     | 27351  | D15Wsu75e   | DNA segment, Chr 15, Wayne State University 75, expressed                                            | -2,40 | 0,65 | 3,81 |
| 214508_x_at   | 1390   | CREM        | cAMP responsive element modulator                                                                    | -2,40 | 0,56 | 3,81 |
| 226859_at     | 548645 | bA16L21.2.1 | DnaJ-like protein                                                                                    | -2,40 | 0,60 | 3,81 |
| 224691_at     | 127933 | UHMK1       | U2AF homology motif (UHM) kinase 1                                                                   | -2,40 | 0,69 | 3,81 |
| 225827_at     | 27161  | EIF2C2      | eukaryotic translation initiation factor 2C, 2                                                       | -2,40 | 0,59 | 3,81 |

|                  |        |           |                                                                                    |       |      |      |
|------------------|--------|-----------|------------------------------------------------------------------------------------|-------|------|------|
| 215349_at        | --     | --        | --                                                                                 | -2,40 | 0,54 | 3,81 |
| 239190_at        | 51231  | VRK3      | vaccinia related kinase 3                                                          | -2,40 | 0,54 | 3,81 |
| 229449_at        | 4967   | OGDH      | oxoglutarate (alpha-ketoglutarate) dehydrogenase (lipoamide)                       | -2,40 | 0,52 | 3,81 |
| 235336_at        | --     | --        | --                                                                                 | -2,40 | 0,62 | 3,81 |
| 221497_x_at      | 54583  | EGLN1     | egl nine homolog 1 (C. elegans)                                                    | -2,40 | 0,62 | 3,81 |
| 236407_at        | 3753   | KCNE1     | potassium voltage-gated channel, Isk-related family, member 1                      | -2,40 | 0,52 | 3,81 |
| 226360_at        | 84133  | ZNRF3     | zinc and ring finger 3                                                             | -2,40 | 0,66 | 3,81 |
| 209681_at        | 10560  | SLC19A2   | solute carrier family 19 (thiamine transporter), member 2                          | -2,40 | 0,58 | 3,81 |
| 222834_s_at      | 55970  | GNG12     | guanine nucleotide binding protein (G protein), gamma 12                           | -2,40 | 0,61 | 3,81 |
| 225056_at        | 57568  | SIPA1L2   | signal-induced proliferation-associated 1 like 2                                   | -2,40 | 0,58 | 3,81 |
| 240773_at        | 7204   | TRIO      | triple functional domain (PTPRF interacting)                                       | -2,40 | 0,55 | 3,81 |
| 227233_at        | 10100  | TSPAN2    | tetraspanin 2                                                                      | -2,40 | 0,54 | 3,81 |
| 24--762_at       | --     | --        | --                                                                                 | -2,40 | 0,47 | 3,81 |
| 240329_at        | 7803   | PTP4A1    | protein tyrosine phosphatase type IVA, member 1                                    | -2,39 | 0,60 | 3,81 |
| 221535_at        | 55341  | LSG1      | large subunit GTPase 1 homolog (S. cerevisiae)                                     | -2,39 | 0,66 | 3,81 |
| 223218_s_at      | 64332  | NFKBIZ    | nuclear factor of kappa light polypeptide gene enhancer in B-cells inhibitor, zeta | -2,39 | 0,53 | 3,81 |
| 1554154_at       | 54834  | GDAP2     | ganglioside induced differentiation associated protein 2                           | -2,39 | 0,56 | 3,81 |
| 23666--_at       | --     | --        | --                                                                                 | -2,39 | 0,60 | 3,81 |
| 203424_s_at      | 3488   | IGFBP5    | insulin-like growth factor binding protein 5                                       | -2,39 | 0,58 | 3,81 |
| 1558045_a_a<br>t | 389906 | LOC389906 | similar to Serine/threonine-protein kinase PRKX (Protein kinase PKX1)              | -2,39 | 0,54 | 3,81 |
| 236699_at        | 10150  | MBNL2     | muscleblind-like 2 (Drosophila)                                                    | -2,39 | 0,57 | 3,81 |
| 227970_at        | 80045  | GPR157    | G protein-coupled receptor 157                                                     | -2,39 | 0,59 | 3,81 |
| 236088_at        | 22854  | NTNG1     | netrin G1                                                                          | -2,39 | 0,46 | 3,81 |
| 216944_s_at      | 3708   | ITPR1     | inositol 1,4,5-triphosphate receptor, type 1                                       | -2,39 | 0,57 | 3,81 |

|                  |        |           |                                                                      |       |      |      |
|------------------|--------|-----------|----------------------------------------------------------------------|-------|------|------|
| 208625_s_at      | 1981   | EIF4G1    | eukaryotic translation initiation factor 4 gamma, 1                  | -2,39 | 0,58 | 3,81 |
| 218647_s_at      | 79693  | YRDC      | yrdC domain containing (E. coli)                                     | -2,39 | 0,57 | 3,81 |
| 203051_at        | 22893  | BAHD1     | bromo adjacent homology domain containing 1                          | -2,39 | 0,58 | 3,81 |
| 210480_s_at      | 4646   | MYO6      | myosin VI                                                            | -2,39 | 0,58 | 3,81 |
| 219426_at        | 192669 | EIF2C3    | eukaryotic translation initiation factor 2C, 3                       | -2,39 | 0,55 | 3,81 |
| 209025_s_at      | 10492  | SYNCRIP   | synaptotagmin binding, cytoplasmic RNA interacting protein           | -2,39 | 0,65 | 3,81 |
| 225529_at        | 116983 | CENTB5    | centaurin, beta 5                                                    | -2,39 | 0,63 | 3,81 |
| 202637_s_at      | 3383   | ICAM1     | intercellular adhesion molecule 1 (CD54), human rhinovirus receptor  | -2,39 | 0,58 | 3,81 |
| 222977_at        | 6836   | SURF4     | surfeit 4                                                            | -2,39 | 0,61 | 3,81 |
| 239045_at        | 2081   | ERN1      | endoplasmic reticulum to nucleus signalling 1                        | -2,39 | 0,59 | 3,81 |
| 213848_at        | 1849   | DUSP7     | dual specificity phosphatase 7                                       | -2,39 | 0,61 | 3,81 |
| 222040_at        | 3178   | HNRPA1    | heterogeneous nuclear ribonucleoprotein A1                           | -2,39 | 0,55 | 3,81 |
| 238686_at        | 26273  | FBXO3     | F-box protein 3                                                      | -2,39 | 0,63 | 3,81 |
| 215045_at        | 11189  | TNRC4     | trinucleotide repeat containing 4                                    | -2,39 | 0,62 | 3,81 |
| 219681_s_at      | 80223  | RAB11FIP1 | RAB11 family interacting protein 1 (class I)                         | -2,39 | 0,56 | 3,81 |
| 1560102_at       | 23092  | ARHGAP26  | Rho GTPase activating protein 26                                     | -2,39 | 0,65 | 3,81 |
| 230945_at        | 10120  | ACTR1B    | ARP1 actin-related protein 1 homolog B, cetractin beta (yeast)       | -2,39 | 0,60 | 3,81 |
| 212814_at        | 23382  | KIAA0828  | adenosylhomocysteinase 3                                             | -2,39 | 0,58 | 3,81 |
| 232859_s_at      | 9223   | MAGI1     | membrane associated guanylate kinase, WW and PDZ domain containing 1 | -2,39 | 0,49 | 3,81 |
| 204156_at        | 23387  | KIAA0999  | KIAA0999 protein                                                     | -2,38 | 0,53 | 3,81 |
| 22729--_at       | --     | --        | --                                                                   | -2,38 | 0,62 | 3,81 |
| 1554918_a_a<br>t | 10257  | ABCC4     | ATP-binding cassette, sub-family C (CFTR/MRP), member 4              | -2,38 | 0,61 | 3,81 |
| 203357_s_at      | 23473  | CAPN7     | calpain 7                                                            | -2,38 | 0,55 | 3,81 |
| 218284_at        | 4088   | SMAD3     | SMAD family member 3                                                 | -2,38 | 0,63 | 3,81 |
| 239299_at        | 414301 | DDI1      | DDI1, DNA-damage inducible 1, homolog 1 (S. cerevisiae)              | -2,38 | 0,61 | 3,81 |

|             |        |           |                                                                                  |       |      |      |
|-------------|--------|-----------|----------------------------------------------------------------------------------|-------|------|------|
| 213471_at   | 261734 | NPHP4     | nephronophthisis 4                                                               | -2,38 | 0,65 | 3,81 |
| 201878_at   | 25820  | ARIH1     | ariadne homolog, ubiquitin-conjugating enzyme E2 binding protein, 1 (Drosophila) | -2,38 | 0,63 | 3,81 |
| 242170_at   | 7710   | ZNF154    | zinc finger protein 154                                                          | -2,38 | 0,61 | 3,81 |
| 235059_at   | 201475 | RAB12     | RAB12, member RAS oncogene family                                                | -2,38 | 0,64 | 3,81 |
| 232864_s_at | 27125  | AFF4      | AF4/FMR2 family, member 4                                                        | -2,38 | 0,61 | 3,81 |
| 243479_at   | 23522  | MYST4     | MYST histone acetyltransferase (monocytic leukemia) 4                            | -2,38 | 0,60 | 3,81 |
| 228037_at   | 5914   | RARA      | retinoic acid receptor, alpha                                                    | -2,38 | 0,60 | 3,81 |
| 202878_s_at | 22918  | CD93      | CD93 molecule                                                                    | -2,38 | 0,65 | 3,81 |
| 211819_s_at | 10580  | SORBS1    | sorbin and SH3 domain containing 1                                               | -2,38 | 0,64 | 3,81 |
| 229550_at   | 57578  | KIAA1409  | KIAA1409                                                                         | -2,38 | 0,53 | 3,81 |
| 237748_at   | 284402 | LOC284402 | hypothetical protein LOC284402                                                   | -2,38 | 0,64 | 3,81 |
| 222631_at   | 55300  | PI4K2B    | phosphatidylinositol 4-kinase type 2 beta                                        | -2,38 | 0,62 | 3,81 |
| 227482_at   | 57143  | ADCK1     | aarF domain containing kinase 1                                                  | -2,38 | 0,62 | 3,81 |
| 213215_at   | 10239  | AP3S2     | adaptor-related protein complex 3, sigma 2 subunit                               | -2,38 | 0,59 | 3,81 |
| 215190_at   | 10480  | PCID1     | PCI domain containing 1 (herpesvirus entry mediator)                             | -2,38 | 0,59 | 3,81 |
| 240889_at   | 256223 | LOC256223 | hypothetical LOC256223                                                           | -2,38 | 0,59 | 3,81 |
| 15649--5_at | --     | --        | --                                                                               | -2,38 | 0,52 | 3,81 |
| 212468_at   | 9043   | SPAG9     | sperm associated antigen 9                                                       | -2,38 | 0,60 | 3,81 |
| 201662_s_at | 2181   | ACSL3     | acyl-CoA synthetase long-chain family member 3                                   | -2,38 | 0,64 | 3,81 |
| 214998_at   | --     | --        | --                                                                               | -2,38 | 0,62 | 3,81 |
| 1555741_at  | 56246  | MRAP      | melanocortin 2 receptor accessory protein                                        | -2,38 | 0,68 | 4,42 |
| 228504_at   | 6332   | SCN7A     | sodium channel, voltage-gated, type VII, alpha                                   | -2,38 | 0,58 | 4,42 |
| 241925_x_at | --     | --        | --                                                                               | -2,38 | 0,52 | 4,42 |
| 201059_at   | 2017   | CTTN      | cortactin                                                                        | -2,38 | 0,64 | 4,42 |
| 1563816_at  | 128954 | GAB4      | GRB2-associated binding protein family, member 4                                 | -2,38 | 0,54 | 4,42 |
| 240098_at   | 55183  | RIF1      | RAP1 interacting factor homolog (yeast)                                          | -2,37 | 0,62 | 4,42 |

|              |        |          |                                                                            |       |      |      |
|--------------|--------|----------|----------------------------------------------------------------------------|-------|------|------|
| 221260_s_at  | 81566  | FAM130A1 | family with sequence similarity 130, member A1                             | -2,37 | 0,58 | 4,42 |
| 225924_at    | 152940 | FLJ25371 | hypothetical protein FLJ25371                                              | -2,37 | 0,66 | 4,42 |
| 1561687_a_at | 84911  | ZNF382   | zinc finger protein 382                                                    | -2,37 | 0,54 | 4,42 |
| 226046_at    | 5599   | MAPK8    | mitogen-activated protein kinase 8                                         | -2,37 | 0,62 | 4,42 |
| 235984_at    | --     | --       | --                                                                         | -2,37 | 0,52 | 4,42 |
| 207518_at    | 8526   | DGKE     | diacylglycerol kinase, epsilon 64kDa                                       | -2,37 | 0,58 | 4,42 |
| 1569352_at   | 57600  | KIAA1450 | KIAA1450 protein                                                           | -2,37 | 0,52 | 4,42 |
| 221011_s_at  | 81606  | LBH      | limb bud and heart development homolog (mouse)                             | -2,37 | 0,62 | 4,42 |
| 236290_at    | 220164 | DOK6     | docking protein 6                                                          | -2,37 | 0,57 | 4,42 |
| 217518_at    | 26509  | FER1L3   | fer-1-like 3, myoferlin (C. elegans)                                       | -2,37 | 0,55 | 4,42 |
| 231553_s_at  | 57553  | MICAL3   | microtubule associated monooxygenase, calponin and LIM domain containing 3 | -2,37 | 0,62 | 4,42 |
| 224277_at    | 153020 | RASGEF1B | RasGEF domain family, member 1B                                            | -2,37 | 0,54 | 4,42 |
| 238834_at    | --     | --       | --                                                                         | -2,37 | 0,49 | 4,42 |
| 208866_at    | 1452   | CSNK1A1  | casein kinase 1, alpha 1                                                   | -2,37 | 0,62 | 4,42 |
| 210764_s_at  | 3491   | CYR61    | cysteine-rich, angiogenic inducer, 61                                      | -2,37 | 0,56 | 4,42 |
| 237127_at    | --     | --       | --                                                                         | -2,37 | 0,54 | 4,42 |
| 229575_at    | --     | --       | --                                                                         | -2,37 | 0,58 | 4,42 |
| 201578_at    | 5420   | PODXL    | podocalyxin-like                                                           | -2,37 | 0,59 | 4,42 |
| 233388_at    | 126626 | MGC29891 | hypothetical protein MGC29891                                              | -2,37 | 0,58 | 4,42 |
| 226828_s_at  | 26508  | HEYL     | hairy/enhancer-of-split related with YRPW motif-like                       | -2,37 | 0,55 | 4,42 |
| 217825_s_at  | 51465  | UBE2J1   | ubiquitin-conjugating enzyme E2, J1 (UBC6 homolog, yeast)                  | -2,37 | 0,62 | 4,42 |
| 216066_at    | 19     | ABCA1    | ATP-binding cassette, sub-family A (ABC1), member 1                        | -2,37 | 0,53 | 4,42 |
| 229715_at    | --     | --       | --                                                                         | -2,37 | 0,51 | 4,42 |
| 203646_at    | 2230   | FDX1     | ferredoxin 1                                                               | -2,37 | 0,65 | 4,42 |
| 205850_s_at  | 2562   | GABRB3   | gamma-aminobutyric acid (GABA) A receptor, beta 3                          | -2,37 | 0,57 | 4,42 |
| 200753_x_at  | 6427   | SFRS2    | splicing factor, arginine/serine-rich 2                                    | -2,37 | 0,58 | 4,42 |

|              |        |          |                                                                                    |       |      |      |
|--------------|--------|----------|------------------------------------------------------------------------------------|-------|------|------|
| 232984_at    | 54768  | HYDIN    | hydrocephalus inducing homolog (mouse)                                             | -2,37 | 0,56 | 4,42 |
| 1555963_x_at | 93010  | B3GNT7   | UDP-GlcNAc:betaGal beta-1,3-N-acetylglucosaminyltransferase 7                      | -2,37 | 0,55 | 4,42 |
| 242834_at    | --     | --       | --                                                                                 | -2,37 | 0,65 | 4,42 |
| 208763_s_at  | 1831   | TSC22D3  | TSC22 domain family, member 3                                                      | -2,37 | 0,61 | 4,42 |
| 234343_s_at  | 9462   | RASAL2   | RAS protein activator like 2                                                       | -2,36 | 0,53 | 4,42 |
| 208776_at    | 5717   | PSMD11   | proteasome (prosome, macropain) 26S subunit, non-ATPase, 11                        | -2,36 | 0,61 | 4,42 |
| 240300_at    | 7084   | TK2      | thymidine kinase 2, mitochondrial                                                  | -2,36 | 0,56 | 4,42 |
| 228388_at    | 4793   | NFKBIB   | nuclear factor of kappa light polypeptide gene enhancer in B-cells inhibitor, beta | -2,36 | 0,57 | 4,42 |
| 216224_s_at  | 10013  | HDAC6    | histone deacetylase 6                                                              | -2,36 | 0,55 | 4,42 |
| 208240_s_at  | 2246   | FGF1     | fibroblast growth factor 1 (acidic)                                                | -2,36 | 0,53 | 4,42 |
| 226750_at    | 55132  | LARP2    | La ribonucleoprotein domain family, member 2                                       | -2,36 | 0,60 | 4,42 |
| 228484_s_at  | 2308   | FOXO1    | forkhead box O1                                                                    | -2,36 | 0,58 | 4,42 |
| 226613_at    | 83874  | TBC1D10A | TBC1 domain family, member 10A                                                     | -2,36 | 0,56 | 4,42 |
| 212664_at    | 10382  | TUBB4    | tubulin, beta 4                                                                    | -2,36 | 0,56 | 4,42 |
| 215716_s_at  | 490    | ATP2B1   | ATPase, Ca++ transporting, plasma membrane 1                                       | -2,36 | 0,65 | 4,42 |
| 225722_at    | --     | --       | --                                                                                 | -2,36 | 0,58 | 4,42 |
| 219256_s_at  | 54436  | SH3TC1   | SH3 domain and tetratricopeptide repeats 1                                         | -2,36 | 0,58 | 4,42 |
| 218974_at    | 55084  | SOBP     | sine oculis binding protein homolog (Drosophila)                                   | -2,36 | 0,58 | 4,42 |
| 37590_g_at   | 374655 | ZNF710   | zinc finger protein 710                                                            | -2,36 | 0,60 | 4,42 |
| 218705_s_at  | 28966  | SNX24    | sorting nexin 24                                                                   | -2,36 | 0,68 | 4,42 |
| 212253_x_at  | 667    | DST      | dystonin                                                                           | -2,36 | 0,66 | 4,42 |
| 235497_at    | --     | --       | --                                                                                 | -2,36 | 0,63 | 4,42 |
| 202071_at    | 6385   | SDC4     | syndecan 4                                                                         | -2,36 | 0,60 | 4,42 |
| 239282_at    | 51134  | CCDC41   | coiled-coil domain containing 41                                                   | -2,36 | 0,54 | 4,42 |
| 2272----_at  | --     | --       | --                                                                                 | -2,36 | 0,63 | 4,42 |
| 223380_s_at  | 26524  | LATS2    | LATS, large tumor suppressor, homolog 2 (Drosophila)                               | -2,36 | 0,60 | 4,42 |
| 1552721_a_a  | 2246   | FGF1     | fibroblast growth factor 1 (acidic)                                                | -2,36 | 0,50 | 4,42 |

|              |                   |                     |                                                                                          |       |      |      |
|--------------|-------------------|---------------------|------------------------------------------------------------------------------------------|-------|------|------|
| t            |                   |                     |                                                                                          |       |      |      |
| 213962_s_at  | 23141             | KIAA0692            | KIAA0692                                                                                 | -2,36 | 0,60 | 4,42 |
| 244836_at    | 5325              | PLAGL1              | pleiomorphic adenoma gene-like 1                                                         | -2,35 | 0,59 | 4,42 |
| 201337_s_at  | 9341              | VAMP3               | vesicle-associated membrane protein 3 (cellubrevin)                                      | -2,35 | 0,56 | 4,42 |
| 228638_at    | 199870            | FAM76A              | family with sequence similarity 76, member A                                             | -2,35 | 0,62 | 4,42 |
| 207205_at    | 1089              | CEACAM4             | carcinoembryonic antigen-related cell adhesion molecule 4                                | -2,35 | 0,63 | 4,42 |
| 207841_at    | 54466             | SPIN2A              | spindlin family, member 2A                                                               | -2,35 | 0,61 | 4,42 |
| 234294_x_at  | 54815             | GATAD2A             | GATA zinc finger domain containing 2A                                                    | -2,35 | 0,65 | 4,42 |
| 212219_at    | 23198             | PSME4               | proteasome (prosome, macropain) activator subunit 4                                      | -2,35 | 0,65 | 4,42 |
| 1561504_s_at | 340156            | RP11-145H9.1        | hypothetical protein LOC340156                                                           | -2,35 | 0,58 | 4,42 |
| 217669_s_at  | 9472              | AKAP6               | A kinase (PRKA) anchor protein 6                                                         | -2,35 | 0,59 | 4,42 |
| 218790_s_at  | 55217             | TMLHE               | trimethyllysine hydroxylase, epsilon                                                     | -2,35 | 0,59 | 4,42 |
| 229587_at    | 10054             | SAE2                | SUMO1 activating enzyme subunit 2                                                        | -2,35 | 0,53 | 4,42 |
| 238300_s_at  | 9802              | DAZAP2              | DAZ associated protein 2                                                                 | -2,35 | 0,60 | 4,42 |
| 1554286_at   | 497049            | FLJ25758            | hypothetical locus FLJ25758                                                              | -2,35 | 0,60 | 4,42 |
| 213786_at    | --                | --                  | --                                                                                       | -2,35 | 0,70 | 4,42 |
| 204241_at    | 8310              | ACOX3               | acyl-Coenzyme A oxidase 3, pristanoyl                                                    | -2,35 | 0,56 | 4,42 |
| 217428_s_at  | 1300              | COL10A1             | collagen, type X, alpha 1(Schmid metaphyseal chondrodysplasia)                           | -2,35 | 0,60 | 4,42 |
| 210141_s_at  | 3623              | INHHA               | inhibin, alpha                                                                           | -2,35 | 0,51 | 4,42 |
| 209372_x_at  | 347733//<br>/7280 | TUBB2B///TU<br>BB2A | tubulin, beta 2B///tubulin, beta 2A                                                      | -2,35 | 0,58 | 4,42 |
| 202616_s_at  | 4204              | MECP2               | methyl CpG binding protein 2 (Rett syndrome)                                             | -2,35 | 0,52 | 4,42 |
| 229907_at    | 6571              | SLC18A2             | solute carrier family 18 (vesicular monoamine), member 2                                 | -2,35 | 0,60 | 4,42 |
| 228013_at    | 5520              | PPP2R2A             | protein phosphatase 2 (formerly 2A), regulatory subunit B, alpha isoform                 | -2,35 | 0,66 | 4,42 |
| 214848_at    | 7534              | YWHAZ               | tyrosine 3-monooxygenase/tryptophan 5-monooxygenase activation protein, zeta polypeptide | -2,35 | 0,65 | 4,42 |

|              |        |           |                                                                                          |       |      |      |
|--------------|--------|-----------|------------------------------------------------------------------------------------------|-------|------|------|
| 227755_at    | --     | --        | --                                                                                       | -2,35 | 0,57 | 4,42 |
| 212714_at    | 113251 | LARP4     | La ribonucleoprotein domain family, member 4                                             | -2,35 | 0,67 | 4,42 |
| 244647_at    | 51729  | WBP11     | WW domain binding protein 11                                                             | -2,35 | 0,58 | 4,42 |
| 218368_s_at  | 51330  | TNFRSF12A | tumor necrosis factor receptor superfamily, member 12A                                   | -2,35 | 0,60 | 4,42 |
| 244358_at    | --     | --        | --                                                                                       | -2,35 | 0,63 | 4,42 |
| 215104_at    | 83714  | NRIP2     | nuclear receptor interacting protein 2                                                   | -2,35 | 0,53 | 4,42 |
| 1555945_s_at | 23196  | FAM120A   | family with sequence similarity 120A                                                     | -2,35 | 0,59 | 4,42 |
| 229941_at    | --     | --        | --                                                                                       | -2,35 | 0,55 | 4,42 |
| 1556242_a_at | --     | --        | --                                                                                       | -2,35 | 0,61 | 4,42 |
| 229867_at    | 114781 | BTBD9     | BTB (POZ) domain containing 9                                                            | -2,35 | 0,68 | 4,42 |
| 231970_at    | 55668  | C14orf118 | chromosome 14 open reading frame 118                                                     | -2,35 | 0,66 | 4,42 |
| 234338_s_at  | 92999  | ZBTB47    | zinc finger and BTB domain containing 47                                                 | -2,35 | 0,60 | 4,42 |
| 237107_at    | 8575   | PRKRA     | protein kinase, interferon-inducible double stranded RNA dependent activator             | -2,35 | 0,55 | 4,42 |
| 244472_at    | --     | --        | --                                                                                       | -2,35 | 0,51 | 4,42 |
| 1555240_s_at | 55970  | GNG12     | guanine nucleotide binding protein (G protein), gamma 12                                 | -2,34 | 0,58 | 4,42 |
| 200640_at    | 7534   | YWHAZ     | tyrosine 3-monooxygenase/tryptophan 5-monooxygenase activation protein, zeta polypeptide | -2,34 | 0,69 | 4,42 |
| 212510_at    | 23171  | GPD1L     | glycerol-3-phosphate dehydrogenase 1-like                                                | -2,34 | 0,62 | 4,42 |
| 213321_at    | 594    | BCKDHB    | branched chain keto acid dehydrogenase E1, beta polypeptide (maple syrup urine disease)  | -2,34 | 0,57 | 4,42 |
| 218149_s_at  | 55893  | ZNF395    | zinc finger protein 395                                                                  | -2,34 | 0,60 | 4,42 |
| 204368_at    | 6578   | SLCO2A1   | solute carrier organic anion transporter family, member 2A1                              | -2,34 | 0,62 | 4,42 |
| 222108_at    | 347902 | AMIGO2    | adhesion molecule with Ig-like domain 2                                                  | -2,34 | 0,62 | 4,42 |
| 207949_s_at  | 3382   | ICA1      | islet cell autoantigen 1, 69kDa                                                          | -2,34 | 0,65 | 4,42 |
| 229485_x_at  | 152573 | LOC152573 | hypothetical protein BC012029                                                            | -2,34 | 0,60 | 4,42 |
| 236974_at    | 23473  | CAPN7     | calpain 7                                                                                | -2,34 | 0,57 | 4,42 |
| 225830_at    | 118987 | PDZD8     | PDZ domain containing 8                                                                  | -2,34 | 0,61 | 4,42 |
| 224848_at    | 1021   | CDK6      | cyclin-dependent kinase 6                                                                | -2,34 | 0,65 | 4,42 |



|                  |        |         |                                                                                 |       |      |      |
|------------------|--------|---------|---------------------------------------------------------------------------------|-------|------|------|
| 227838_at        | --     | --      | --                                                                              | -2,34 | 0,51 | 4,42 |
| 211776_s_at      | 23136  | EPB41L3 | erythrocyte membrane protein band 4.1-like 3                                    | -2,34 | 0,52 | 4,42 |
| 222687_s_at      | 55331  | PHCA    | phytoceramidase, alkaline                                                       | -2,34 | 0,59 | 4,42 |
| 231698_at        | 7360   | UGP2    | UDP-glucose pyrophosphorylase 2                                                 | -2,34 | 0,55 | 4,42 |
| 215774_s_at      | --     | --      | --                                                                              | -2,34 | 0,54 | 4,42 |
| 225025_at        | 93185  | IGSF8   | immunoglobulin superfamily, member 8                                            | -2,34 | 0,56 | 4,42 |
| 238784_at        | 283417 | DPY19L2 | dpy-19-like 2 (C. elegans)                                                      | -2,34 | 0,56 | 4,42 |
| 218205_s_at      | 2872   | MKNK2   | MAP kinase interacting serine/threonine kinase 2                                | -2,34 | 0,66 | 4,42 |
| 235222_x_at      | 331    | BIRC4   | baculoviral IAP repeat-containing 4                                             | -2,34 | 0,56 | 4,42 |
| 212070_at        | 9289   | GPR56   | G protein-coupled receptor 56                                                   | -2,34 | 0,63 | 4,42 |
| 201574_at        | 2107   | ETF1    | eukaryotic translation termination factor 1                                     | -2,33 | 0,65 | 4,42 |
| 216183_at        | 7052   | TGM2    | transglutaminase 2 (C polypeptide, protein-glutamine-gamma-glutamyltransferase) | -2,33 | 0,60 | 4,42 |
| 23633--_at       | --     | --      | --                                                                              | -2,33 | 0,58 | 4,42 |
| 201248_s_at      | 6721   | SREBF2  | sterol regulatory element binding transcription factor 2                        | -2,33 | 0,62 | 4,42 |
| 1552448_a_a<br>t | 83656  | C8orf12 | chromosome 8 open reading frame 12                                              | -2,33 | 0,54 | 4,42 |
| 221483_s_at      | 10776  | ARPP-19 | cyclic AMP phosphoprotein, 19 kD                                                | -2,33 | 0,64 | 4,42 |
| 238546_at        | 6546   | SLC8A1  | solute carrier family 8 (sodium/calcium exchanger), member 1                    | -2,33 | 0,54 | 4,42 |
| 213327_s_at      | 219333 | USP12   | ubiquitin specific peptidase 12                                                 | -2,33 | 0,65 | 4,42 |
| 222991_s_at      | 29979  | UBQLN1  | ubiquilin 1                                                                     | -2,33 | 0,64 | 4,42 |
| 243871_at        | 7128   | TNFAIP3 | tumor necrosis factor, alpha-induced protein 3                                  | -2,33 | 0,50 | 4,42 |
| 204814_at        | 8618   | CADPS   | Ca <sup>2+</sup> -dependent secretion activator                                 | -2,33 | 0,56 | 4,42 |
| 231003_at        | 51000  | SLC35B3 | solute carrier family 35, member B3                                             | -2,33 | 0,58 | 4,42 |
| 216731_s_at      | --     | --      | --                                                                              | -2,33 | 0,55 | 4,42 |
| 236857_at        | 81539  | SLC38A1 | solute carrier family 38, member 1                                              | -2,33 | 0,61 | 4,42 |
| 212214_at        | 4976   | OPA1    | optic atrophy 1 (autosomal dominant)                                            | -2,33 | 0,65 | 4,42 |
| 212470_at        | 9043   | SPAG9   | sperm associated antigen 9                                                      | -2,33 | 0,63 | 4,42 |

|              |        |           |                                                                        |       |      |      |
|--------------|--------|-----------|------------------------------------------------------------------------|-------|------|------|
| 213179_at    | 9125   | RQCD1     | RCD1 required for cell differentiation1 homolog (S. pombe)             | -2,33 | 0,61 | 4,42 |
| 230953_at    | 54578  | UGT1A6    | UDP glucuronosyltransferase 1 family, polypeptide A6                   | -2,33 | 0,40 | 4,42 |
| 213501_at    | 51     | ACOX1     | acyl-Coenzyme A oxidase 1, palmitoyl                                   | -2,33 | 0,53 | 4,42 |
| 208836_at    | 483    | ATP1B3    | ATPase, Na+/K+ transporting, beta 3 polypeptide                        | -2,33 | 0,66 | 4,42 |
| 211310_at    | 2145   | EZH1      | enhancer of zeste homolog 1 (Drosophila)                               | -2,33 | 0,57 | 4,42 |
| 238813_at    | 212    | ALAS2     | aminolevulinate, delta-, synthase 2 (sideroblastic/hypochromic anemia) | -2,33 | 0,60 | 4,42 |
| 233433_at    | 5126   | PCSK2     | proprotein convertase subtilisin/kexin type 2                          | -2,33 | 0,55 | 4,42 |
| 209454_s_at  | 7005   | TEAD3     | TEA domain family member 3                                             | -2,33 | 0,58 | 4,42 |
| 219747_at    | 79625  | C4orf31   | chromosome 4 open reading frame 31                                     | -2,33 | 0,48 | 4,42 |
| 239336_at    | 7057   | THBS1     | thrombospondin 1                                                       | -2,33 | 0,57 | 4,42 |
| 208633_s_at  | 23499  | MACF1     | microtubule-actin crosslinking factor 1                                | -2,33 | 0,64 | 4,42 |
| 207383_s_at  | 9028   | RHBDL1    | rhomboid, veinlet-like 1 (Drosophila)                                  | -2,33 | 0,54 | 4,42 |
| 241926_s_at  | 2078   | ERG       | v-ets erythroblastosis virus E26 oncogene homolog (avian)              | -2,33 | 0,65 | 4,42 |
| 1557147_a_at | 25987  | TSKU      | tsukushin                                                              | -2,33 | 0,53 | 4,42 |
| 201975_at    | 6249   | CLIP1     | CAP-GLY domain containing linker protein 1                             | -2,33 | 0,68 | 4,42 |
| 227203_at    | 64839  | FBXL17    | F-box and leucine-rich repeat protein 17                               | -2,33 | 0,65 | 4,42 |
| 235348_at    | 84945  | ABHD13    | abhydrolase domain containing 13                                       | -2,33 | 0,56 | 4,42 |
| 218093_s_at  | 55608  | ANKRD10   | ankyrin repeat domain 10                                               | -2,33 | 0,64 | 4,42 |
| 223263_s_at  | 26127  | FGFR1OP2  | FGFR1 oncogene partner 2                                               | -2,33 | 0,57 | 4,42 |
| 230920_at    | 284542 | LOC284542 | hypothetical protein LOC284542                                         | -2,33 | 0,52 | 4,42 |
| 240377_at    | 9284   | NPIP      | nuclear pore complex interacting protein                               | -2,32 | 0,64 | 4,42 |
| 1568745_at   | --     | --        | --                                                                     | -2,32 | 0,63 | 4,42 |
| 214168_s_at  | 7082   | TJP1      | tight junction protein 1 (zona occludens 1)                            | -2,32 | 0,58 | 4,42 |
| 236204_at    | 10920  | COPS8     | COP9 constitutive photomorphogenic homolog subunit 8 (Arabidopsis)     | -2,32 | 0,63 | 4,42 |
| 203017_s_at  | 117178 | SSX2IP    | synovial sarcoma, X breakpoint 2 interacting protein                   | -2,32 | 0,61 | 4,42 |
| 233843_at    | 221527 | ZBTB12    | zinc finger and BTB domain containing 12                               | -2,32 | 0,56 | 4,42 |

|              |        |          |                                                                                     |       |      |      |
|--------------|--------|----------|-------------------------------------------------------------------------------------|-------|------|------|
| 242826_at    | 51144  | HSD17B12 | hydroxysteroid (17-beta) dehydrogenase 12                                           | -2,32 | 0,64 | 4,42 |
| 236932_s_at  | 54815  | GATAD2A  | GATA zinc finger domain containing 2A                                               | -2,32 | 0,58 | 4,42 |
| 1559239_s_at | 38     | ACAT1    | acetyl-Coenzyme A acetyltransferase 1 (acetoacetyl Coenzyme A thiolase)             | -2,32 | 0,63 | 4,42 |
| 201182_s_at  | 1108   | CHD4     | chromodomain helicase DNA binding protein 4                                         | -2,32 | 0,60 | 4,42 |
| 204011_at    | 10253  | SPRY2    | sprouty homolog 2 (Drosophila)                                                      | -2,32 | 0,54 | 4,42 |
| 225316_at    | 84879  | MFSD2    | major facilitator superfamily domain containing 2                                   | -2,32 | 0,58 | 4,42 |
| 24--432_x_at | --     | --       | --                                                                                  | -2,32 | 0,61 | 4,42 |
| 202575_at    | 1382   | CRABP2   | cellular retinoic acid binding protein 2                                            | -2,32 | 0,52 | 4,42 |
| 210026_s_at  | 29775  | CARD10   | caspase recruitment domain family, member 10                                        | -2,32 | 0,55 | 4,42 |
| 225020_at    | 153090 | DAB2IP   | DAB2 interacting protein                                                            | -2,32 | 0,64 | 4,42 |
| 207000_s_at  | 5533   | PPP3CC   | protein phosphatase 3 (formerly 2B), catalytic subunit, gamma isoform               | -2,32 | 0,64 | 4,42 |
| 227180_at    | 79993  | ELOVL7   | ELOVL family member 7, elongation of long chain fatty acids (yeast)                 | -2,32 | 0,59 | 4,42 |
| 228835_at    | --     | --       | --                                                                                  | -2,32 | 0,63 | 4,42 |
| 216568_x_at  | --     | --       | --                                                                                  | -2,32 | 0,55 | 4,42 |
| 24195--_at   | --     | --       | --                                                                                  | -2,32 | 0,54 | 4,42 |
| 222352_at    | 79791  | FBXO31   | F-box protein 31                                                                    | -2,32 | 0,53 | 4,42 |
| 226105_at    | 56913  | C1GALT1  | core 1 synthase, glycoprotein-N-acetylgalactosamine 3-beta-galactosyltransferase, 1 | -2,32 | 0,64 | 4,42 |
| 202335_s_at  | 7320   | UBE2B    | ubiquitin-conjugating enzyme E2B (RAD6 homolog)                                     | -2,32 | 0,53 | 4,42 |
| 202524_s_at  | 9806   | SPOCK2   | sparc/osteonectin, cwcv and kazal-like domains proteoglycan (testican) 2            | -2,32 | 0,60 | 4,42 |
| 203123_s_at  | 4891   | SLC11A2  | solute carrier family 11 (proton-coupled divalent metal ion transporters), member 2 | -2,31 | 0,61 | 4,42 |
| 209378_s_at  | 54462  | KIAA1128 | KIAA1128                                                                            | -2,31 | 0,68 | 4,42 |
| 207791_s_at  | 5861   | RAB1A    | RAB1A, member RAS oncogene family                                                   | -2,31 | 0,67 | 4,42 |
| 235985_at    | 23760  | PITPNB   | phosphatidylinositol transfer protein, beta                                         | -2,31 | 0,60 | 4,42 |

|             |        |          |                                                                                              |       |      |      |
|-------------|--------|----------|----------------------------------------------------------------------------------------------|-------|------|------|
| 223641_at   | 375056 | MIA3     | melanoma inhibitory activity family, member 3                                                | -2,31 | 0,65 | 4,42 |
| 211749_s_at | 9341   | VAMP3    | vesicle-associated membrane protein 3 (cellubrevin)                                          | -2,31 | 0,62 | 4,42 |
| 208594_x_at | 79168  | LILRA6   | leukocyte immunoglobulin-like receptor, subfamily A (with TM domain), member 6               | -2,31 | 0,61 | 4,42 |
| 238573_at   | --     | --       | --                                                                                           | -2,31 | 0,62 | 4,42 |
| 213307_at   | 22941  | SHANK2   | SH3 and multiple ankyrin repeat domains 2                                                    | -2,31 | 0,60 | 4,42 |
| 226377_at   | --     | --       | --                                                                                           | -2,31 | 0,55 | 4,42 |
| 219397_at   | 80219  | COQ10B   | coenzyme Q10 homolog B ( <i>S. cerevisiae</i> )                                              | -2,31 | 0,64 | 4,42 |
| 225997_at   | 92597  | MOBKL1A  | MOB1, Mps One Binder kinase activator-like 1A (yeast)                                        | -2,31 | 0,60 | 4,42 |
| 1563943_at  | 133522 | PPARGC1B | peroxisome proliferator-activated receptor gamma, coactivator 1 beta                         | -2,31 | 0,58 | 4,42 |
| 233648_at   | 23235  | SNF1LK2  | SNF1-like kinase 2                                                                           | -2,31 | 0,56 | 4,42 |
| 242153_at   | 55132  | LARP2    | La ribonucleoprotein domain family, member 2                                                 | -2,31 | 0,59 | 4,42 |
| 207643_s_at | 7132   | TNFRSF1A | tumor necrosis factor receptor superfamily, member 1A                                        | -2,31 | 0,63 | 4,42 |
| 227064_at   | 91369  | ANKRD40  | ankyrin repeat domain 40                                                                     | -2,31 | 0,64 | 4,42 |
| 226985_at   | 152273 | FGD5     | FYVE, RhoGEF and PH domain containing 5                                                      | -2,31 | 0,59 | 4,42 |
| 220097_s_at | 54868  | TMEM104  | transmembrane protein 104                                                                    | -2,31 | 0,63 | 4,42 |
| 203280_at   | 9667   | SAFB2    | scaffold attachment factor B2                                                                | -2,31 | 0,49 | 4,42 |
| 208686_s_at | 6046   | BRD2     | bromodomain containing 2                                                                     | -2,31 | 0,54 | 4,42 |
| 210793_s_at | 4928   | NUP98    | nucleoporin 98kDa                                                                            | -2,31 | 0,61 | 4,42 |
| 242487_at   | 200014 | CC2D1B   | coiled-coil and C2 domain containing 1B                                                      | -2,31 | 0,62 | 4,42 |
| 239170_at   | 10096  | ACTR3    | ARP3 actin-related protein 3 homolog (yeast)                                                 | -2,31 | 0,56 | 4,42 |
| 219395_at   | 80004  | RBM35B   | RNA binding motif protein 35B                                                                | -2,31 | 0,64 | 4,42 |
| 232671_at   | 200172 | SLFNL1   | schlafen-like 1                                                                              | -2,31 | 0,55 | 4,42 |
| 232044_at   | 5930   | RBBP6    | retinoblastoma binding protein 6                                                             | -2,31 | 0,60 | 4,42 |
| 231963_at   | --     | --       | --                                                                                           | -2,31 | 0,58 | 4,42 |
| 204491_at   | 5144   | PDE4D    | phosphodiesterase 4D, cAMP-specific (phosphodiesterase E3 dunce homolog, <i>Drosophila</i> ) | -2,31 | 0,68 | 4,42 |

|             |        |          |                                                                               |       |      |      |
|-------------|--------|----------|-------------------------------------------------------------------------------|-------|------|------|
| 212444_at   | 9052   | GPRC5A   | G protein-coupled receptor, family C, group 5, member A                       | -2,31 | 0,60 | 4,42 |
| 202928_s_at | 5252   | PHF1     | PHD finger protein 1                                                          | -2,31 | 0,60 | 4,42 |
| 214002_at   | 4637   | MYL6     | myosin, light chain 6, alkali, smooth muscle and non-muscle                   | -2,31 | 0,58 | 4,42 |
| 202056_at   | 3836   | KPNA1    | karyopherin alpha 1 (importin alpha 5)                                        | -2,31 | 0,60 | 4,42 |
| 1553612_at  | --     | --       | --                                                                            | -2,31 | 0,58 | 4,42 |
| 236285_at   | 113730 | KLHDC7B  | kelch domain containing 7B                                                    | -2,31 | 0,60 | 4,42 |
| 242149_at   | 125228 | C18orf19 | chromosome 18 open reading frame 19                                           | -2,30 | 0,58 | 4,42 |
| 205866_at   | 8547   | FCN3     | ficolin (collagen/fibrinogen domain containing) 3 (Hakata antigen)            | -2,30 | 0,50 | 4,42 |
| 228674_s_at | 27436  | EML4     | echinoderm microtubule associated protein like 4                              | -2,30 | 0,59 | 4,42 |
| 226390_at   | 134429 | STARD4   | START domain containing 4, sterol regulated                                   | -2,30 | 0,60 | 4,42 |
| 1566737_at  | --     | --       | --                                                                            | -2,30 | 0,55 | 4,42 |
| 229430_at   | 254778 | C8orf46  | chromosome 8 open reading frame 46                                            | -2,30 | 0,63 | 4,42 |
| 241946_at   | 340481 | ZDHHC21  | zinc finger, DHHC-type containing 21                                          | -2,30 | 0,53 | 4,42 |
| 216995_x_at | 23609  | MKRN2    | makorin, ring finger protein, 2                                               | -2,30 | 0,57 | 4,42 |
| 24156--_at  | --     | --       | --                                                                            | -2,30 | 0,40 | 4,42 |
| 1556056_at  | 23235  | SNF1LK2  | SNF1-like kinase 2                                                            | -2,30 | 0,60 | 4,42 |
| 225382_at   | 10838  | ZNF275   | zinc finger protein 275                                                       | -2,30 | 0,60 | 4,42 |
| 202363_at   | 6695   | SPOCK1   | sparc/osteonectin, cwcv and kazal-like domains proteoglycan (testican) 1      | -2,30 | 0,59 | 4,42 |
| 201537_s_at | 1845   | DUSP3    | dual specificity phosphatase 3 (vaccinia virus phosphatase VH1-related)       | -2,30 | 0,65 | 4,42 |
| 222562_s_at | 80351  | TNKS2    | tankyrase, TRF1-interacting ankyrin-related ADP-ribose polymerase 2           | -2,30 | 0,63 | 4,42 |
| 222354_at   | 50848  | F11R     | F11 receptor                                                                  | -2,30 | 0,64 | 4,42 |
| 201286_at   | 6382   | SDC1     | syndecan 1                                                                    | -2,30 | 0,62 | 4,42 |
| 229306_at   | 388125 | NLF2     | nuclear localized factor 2                                                    | -2,30 | 0,45 | 4,42 |
| 209536_s_at | 30844  | EHD4     | EH-domain containing 4                                                        | -2,30 | 0,61 | 4,42 |
| 238799_at   | 27109  | ATP5S    | ATP synthase, H+ transporting, mitochondrial F0 complex, subunit s (factor B) | -2,30 | 0,55 | 4,42 |

|                  |        |         |                                                                   |       |      |      |
|------------------|--------|---------|-------------------------------------------------------------------|-------|------|------|
| 221490_at        | 51271  | UBAP1   | ubiquitin associated protein 1                                    | -2,30 | 0,66 | 4,42 |
| 241679_at        | 9590   | AKAP12  | A kinase (PRKA) anchor protein (gravin) 12                        | -2,30 | 0,54 | 4,42 |
| 22911--_at       | --     | --      | --                                                                | -2,30 | 0,52 | 4,42 |
| 229690_at        | 144717 | FAM109A | family with sequence similarity 109, member A                     | -2,29 | 0,59 | 4,42 |
| 222309_at        | 81688  | C6orf62 | chromosome 6 open reading frame 62                                | -2,29 | 0,60 | 4,42 |
| 212319_at        | 9905   | RUTBC1  | RUN and TBC1 domain containing 1                                  | -2,29 | 0,49 | 4,42 |
| 209203_s_at      | 23299  | BICD2   | bicaudal D homolog 2 (Drosophila)                                 | -2,29 | 0,53 | 4,42 |
| 225161_at        | 85476  | GFM1    | G elongation factor, mitochondrial 1                              | -2,29 | 0,64 | 4,42 |
| 22595--_at       | --     | --      | --                                                                | -2,29 | 0,63 | 4,42 |
| 221408_x_at      | 56124  | PCDHB12 | protocadherin beta 12                                             | -2,29 | 0,54 | 4,42 |
| 213012_at        | 4734   | NEDD4   | neural precursor cell expressed, developmentally down-regulated 4 | -2,29 | 0,63 | 4,42 |
| 242287_at        | 6249   | CLIP1   | CAP-GLY domain containing linker protein 1                        | -2,29 | 0,57 | 4,42 |
| 206929_s_at      | 4782   | NFIC    | nuclear factor I/C (CCAAT-binding transcription factor)           | -2,29 | 0,57 | 4,42 |
| 206172_at        | 3598   | IL13RA2 | interleukin 13 receptor, alpha 2                                  | -2,29 | 0,57 | 4,42 |
| 1569368_at       | --     | --      | --                                                                | -2,29 | 0,62 | 4,42 |
| 230894_s_at      | 124540 | MSI2    | musashi homolog 2 (Drosophila)                                    | -2,29 | 0,55 | 4,42 |
| 213538_at        | 6651   | SON     | SON DNA binding protein                                           | -2,29 | 0,62 | 4,42 |
| 231880_at        | 57464  | FAM40B  | family with sequence similarity 40, member B                      | -2,29 | 0,52 | 4,42 |
| 219361_s_at      | 64782  | ISG20L1 | interferon stimulated exonuclease gene 20kDa-like 1               | -2,29 | 0,61 | 4,42 |
| 1555370_a_a<br>t | 23261  | CAMTA1  | calmodulin binding transcription activator 1                      | -2,29 | 0,61 | 4,42 |
| 242887_at        | --     | --      | --                                                                | -2,29 | 0,65 | 4,42 |
| 229694_at        | 55717  | BRWD2   | bromodomain and WD repeat domain containing 2                     | -2,29 | 0,56 | 4,42 |
| 218547_at        | 79947  | DHDDS   | dehydrodolichyl diphosphate synthase                              | -2,29 | 0,62 | 4,42 |
| 229250_at        | 219931 | TPCN2   | two pore segment channel 2                                        | -2,29 | 0,54 | 4,42 |
| 215664_s_at      | 2044   | EPHA5   | EPH receptor A5                                                   | -2,29 | 0,62 | 4,42 |
| 208156_x_at      | 83481  | EPPK1   | epiplakin 1                                                       | -2,29 | 0,54 | 4,42 |
| 203693_s_at      | 1871   | E2F3    | E2F transcription factor 3                                        | -2,29 | 0,64 | 4,42 |

|             |        |           |                                                                                              |       |      |      |
|-------------|--------|-----------|----------------------------------------------------------------------------------------------|-------|------|------|
| 214665_s_at | 11261  | CHP       | calcium binding protein P22                                                                  | -2,29 | 0,66 | 4,42 |
| 243690_at   | 11078  | TRIOBP    | TRIO and F-actin binding protein                                                             | -2,29 | 0,58 | 4,42 |
| 226247_at   | 59338  | PLEKHA1   | pleckstrin homology domain containing, family A (phosphoinositide binding specific) member 1 | -2,29 | 0,68 | 4,42 |
| 201334_s_at | 23365  | ARHGEF12  | Rho guanine nucleotide exchange factor (GEF) 12                                              | -2,29 | 0,73 | 4,42 |
| 228706_s_at | 137075 | CLDN23    | claudin 23                                                                                   | -2,29 | 0,58 | 4,42 |
| 221460_at   | 4993   | OR2C1     | olfactory receptor, family 2, subfamily C, member 1                                          | -2,29 | 0,59 | 4,42 |
| 203072_at   | 4643   | MYO1E     | myosin IE                                                                                    | -2,29 | 0,58 | 4,42 |
| 235637_s_at | 56478  | EIF4ENIF1 | eukaryotic translation initiation factor 4E nuclear import factor 1                          | -2,29 | 0,65 | 4,42 |
| 205809_s_at | 8976   | WASL      | Wiskott-Aldrich syndrome-like                                                                | -2,29 | 0,54 | 4,42 |
| 223077_at   | 29766  | TMOD3     | tropomodulin 3 (ubiquitous)                                                                  | -2,29 | 0,65 | 4,42 |
| 238172_at   | 4705   | NDUFA10   | NADH dehydrogenase (ubiquinone) 1 alpha subcomplex, 10, 42kDa                                | -2,28 | 0,60 | 4,42 |
| 209802_at   | 7262   | PHLDA2    | pleckstrin homology-like domain, family A, member 2                                          | -2,28 | 0,60 | 4,42 |
| 212887_at   | 10484  | SEC23A    | Sec23 homolog A ( <i>S. cerevisiae</i> )                                                     | -2,28 | 0,70 | 4,42 |
| 217894_at   | 51133  | KCTD3     | potassium channel tetramerisation domain containing 3                                        | -2,28 | 0,67 | 4,42 |
| 228653_at   | 389432 | SAMD5     | sterile alpha motif domain containing 5                                                      | -2,28 | 0,63 | 4,42 |
| 203019_x_at | 117178 | SSX2IP    | synovial sarcoma, X breakpoint 2 interacting protein                                         | -2,28 | 0,62 | 4,42 |
| 241425_at   | 9818   | NUPL1     | nucleoporin like 1                                                                           | -2,28 | 0,58 | 4,42 |
| 1556129_at  | 197320 | ZNF778    | zinc finger protein 778                                                                      | -2,28 | 0,65 | 4,42 |
| 230315_at   | 51274  | KLF3      | Kruppel-like factor 3 (basic)                                                                | -2,28 | 0,56 | 4,42 |
| 225519_at   | 151987 | PPP4R2    | protein phosphatase 4, regulatory subunit 2                                                  | -2,28 | 0,65 | 4,42 |
| 230930_at   | 338620 | LOC338620 | hypothetical protein LOC338620                                                               | -2,28 | 0,61 | 4,42 |
| 202253_s_at | 1785   | DNM2      | dynamamin 2                                                                                  | -2,28 | 0,47 | 4,42 |
| 202617_s_at | 4204   | MECP2     | methyl CpG binding protein 2 (Rett syndrome)                                                 | -2,28 | 0,67 | 4,42 |

|              |        |          |                                                                                                      |       |      |      |
|--------------|--------|----------|------------------------------------------------------------------------------------------------------|-------|------|------|
| 223058_at    | 83641  | FAM107B  | family with sequence similarity 107, member B                                                        | -2,28 | 0,64 | 4,42 |
| 219915_s_at  | 117247 | SLC16A10 | solute carrier family 16, member 10 (aromatic amino acid transporter)                                | -2,28 | 0,54 | 4,42 |
| 206027_at    | 6274   | S100A3   | S100 calcium binding protein A3                                                                      | -2,28 | 0,61 | 4,42 |
| 230130_at    | 9353   | SLIT2    | slit homolog 2 (Drosophila)                                                                          | -2,28 | 0,53 | 4,42 |
| 209712_at    | 23169  | SLC35D1  | solute carrier family 35 (UDP-glucuronic acid/UDP-N-acetylgalactosamine dual transporter), member D1 | -2,28 | 0,67 | 4,42 |
| 242772_x_at  | --     | --       | --                                                                                                   | -2,28 | 0,59 | 4,42 |
| 207201_s_at  | 6580   | SLC22A1  | solute carrier family 22 (organic cation transporter), member 1                                      | -2,28 | 0,52 | 4,42 |
| 221053_s_at  | 11022  | TDRKH    | tudor and KH domain containing                                                                       | -2,28 | 0,61 | 4,42 |
| 206074_s_at  | 3159   | HMGA1    | high mobility group AT-hook 1                                                                        | -2,28 | 0,56 | 4,42 |
| 228944_at    | 257    | ALX3     | aristaless-like homeobox 3                                                                           | -2,28 | 0,64 | 4,42 |
| 1565862_a_at | 9414   | TJP2     | tight junction protein 2 (zona occludens 2)                                                          | -2,28 | 0,55 | 4,42 |
| 207717_s_at  | 5318   | PKP2     | plakophilin 2                                                                                        | -2,28 | 0,59 | 4,42 |
| 1556656_at   | 114793 | FMNL2    | formin-like 2                                                                                        | -2,28 | 0,59 | 4,42 |
| 1559232_a_at | 9197   | SLC33A1  | solute carrier family 33 (acetyl-CoA transporter), member 1                                          | -2,28 | 0,55 | 4,42 |
| 227021_at    | 221656 | AOF1     | amine oxidase (flavin containing) domain 1                                                           | -2,28 | 0,60 | 4,42 |
| 204226_at    | 27067  | STAU2    | staufen, RNA binding protein, homolog 2 (Drosophila)                                                 | -2,28 | 0,63 | 4,42 |
| 201790_s_at  | 1717   | DHCR7    | 7-dehydrocholesterol reductase                                                                       | -2,28 | 0,58 | 4,42 |
| 227823_at    | 340526 | RGAG4    | retrotransposon gag domain containing 4                                                              | -2,28 | 0,56 | 4,42 |
| 1570198_x_at | 83483  | PLVAP    | plasmalemma vesicle associated protein                                                               | -2,27 | 0,60 | 4,42 |
| 223167_s_at  | 29761  | USP25    | ubiquitin specific peptidase 25                                                                      | -2,27 | 0,58 | 4,42 |
| 227236_at    | 10100  | TSPAN2   | tetraspanin 2                                                                                        | -2,27 | 0,60 | 4,42 |
| 243993_at    | 5128   | PCK2     | PCTAIRE protein kinase 2                                                                             | -2,27 | 0,45 | 4,42 |
| 63825_at     | --     | --       | --                                                                                                   | -2,27 | 0,59 | 4,42 |
| 214774_x_at  | 27324  | TOX3     | TOX high mobility group box family member 3                                                          | -2,27 | 0,57 | 4,42 |
| 1554557_at   | 23200  | ATP11B   | ATPase, Class VI, type 11B                                                                           | -2,27 | 0,65 | 4,42 |
| 15657--1_at  | --     | --       | --                                                                                                   | -2,27 | 0,51 | 4,42 |



|                  |        |                    |                                                                                      |       |      |      |
|------------------|--------|--------------------|--------------------------------------------------------------------------------------|-------|------|------|
| 202519_at        | 22877  | MLXIP              | MLX interacting protein                                                              | -2,27 | 0,64 | 4,42 |
| 214462_at        | 9306   | SOCS6              | suppressor of cytokine signaling 6                                                   | -2,27 | 0,59 | 4,42 |
| 1556763_at       | 5144   | PDE4D              | phosphodiesterase 4D, cAMP-specific (phosphodiesterase E3 dunce homolog, Drosophila) | -2,27 | 0,54 | 4,42 |
| 215561_s_at      | 3554   | IL1R1              | interleukin 1 receptor, type I                                                       | -2,27 | 0,55 | 4,42 |
| 224047_at        | 51132  | RNF12              | ring finger protein 12                                                               | -2,27 | 0,61 | 4,42 |
| 239533_at        | 151556 | GPR155             | G protein-coupled receptor 155                                                       | -2,27 | 0,60 | 4,42 |
| 226030_at        | 36     | ACADSB             | acyl-Coenzyme A dehydrogenase, short/branched chain                                  | -2,27 | 0,61 | 4,42 |
| 1554683_a_a<br>t | 399693 | MGC50722           | hypothetical MGC50722                                                                | -2,27 | 0,61 | 4,42 |
| 214967_at        | --     | --                 | --                                                                                   | -2,27 | 0,53 | 4,42 |
| 22885--s_at      | --     | --                 | --                                                                                   | -2,27 | 0,54 | 4,42 |
| 219866_at        | 53405  | CLIC5              | chloride intracellular channel 5                                                     | -2,27 | 0,52 | 4,42 |
| 203914_x_at      | 3248   | HPGD               | hydroxyprostaglandin dehydrogenase 15-(NAD)                                          | -2,27 | 0,60 | 4,42 |
| 1557586_s_at     | 51606  | ATP6V1H            | ATPase, H <sup>+</sup> transporting, lysosomal 50/57kDa, V1 subunit H                | -2,27 | 0,59 | 4,42 |
| 244828_x_at      | 92345  | LOC92345           | hypothetical protein BC008207                                                        | -2,26 | 0,62 | 4,42 |
| 209493_at        | 23037  | PDZD2              | PDZ domain containing 2                                                              | -2,26 | 0,63 | 4,42 |
| 243316_x_at      | 9559   | VPS26A             | vacuolar protein sorting 26 homolog A (S. pombe)                                     | -2,26 | 0,59 | 4,42 |
| 211139_s_at      | 4664   | NAB1               | NGFI-A binding protein 1 (EGR1 binding protein 1)                                    | -2,26 | 0,60 | 4,42 |
| 213486_at        | 57183  | DKFZP761N09<br>121 | hypothetical protein DKFzp761N09121                                                  | -2,26 | 0,61 | 4,42 |
| 214446_at        | 22936  | ELL2               | elongation factor, RNA polymerase II, 2                                              | -2,26 | 0,60 | 4,84 |
| 224985_at        | 7812   | CSDE1              | cold shock domain containing E1, RNA-binding                                         | -2,26 | 0,67 | 4,84 |
| 15584--4_at      | --     | --                 | --                                                                                   | -2,26 | 0,62 | 4,84 |
| 213861_s_at      | 25895  | FAM119B            | family with sequence similarity 119, member B                                        | -2,26 | 0,55 | 4,84 |
| 243057_at        | 222235 | FBXL13             | F-box and leucine-rich repeat protein 13                                             | -2,26 | 0,53 | 4,84 |
| 226259_at        | 54536  | EXOC6              | exocyst complex component 6                                                          | -2,26 | 0,64 | 4,84 |

|                   |        |          |                                                                              |       |      |      |
|-------------------|--------|----------|------------------------------------------------------------------------------|-------|------|------|
| 223262_s_at       | 26127  | FGFR1OP2 | FGFR1 oncogene partner 2                                                     | -2,26 | 0,63 | 4,84 |
| 203365_s_at       | 4324   | MMP15    | matrix metalloproteinase 15 (membrane-inserted)                              | -2,26 | 0,59 | 4,84 |
| 231376_at         | 151531 | UPP2     | uridine phosphorylase 2                                                      | -2,26 | 0,51 | 4,84 |
| 220968_s_at       | 10867  | TSPAN9   | tetraspanin 9                                                                | -2,26 | 0,69 | 4,84 |
| 241429_at         | --     | --       | --                                                                           | -2,26 | 0,65 | 4,84 |
| 225471_s_at       | 208    | AKT2     | v-akt murine thymoma viral oncogene homolog 2                                | -2,26 | 0,53 | 4,84 |
| 203837_at         | 4217   | MAP3K5   | mitogen-activated protein kinase kinase kinase 5                             | -2,26 | 0,59 | 4,84 |
| 229842_at         | 1999   | ELF3     | E74-like factor 3 (ets domain transcription factor, epithelial-specific )    | -2,26 | 0,58 | 4,84 |
| 239329_at         | 23011  | RAB21    | RAB21, member RAS oncogene family                                            | -2,26 | 0,62 | 4,84 |
| 231839_at         | 201626 | 2'-PDE   | 2'-phosphodiesterase                                                         | -2,26 | 0,59 | 4,84 |
| 205468_s_at       | 3663   | IRF5     | interferon regulatory factor 5                                               | -2,26 | 0,58 | 4,84 |
| 212200_at         | 23141  | KIAA0692 | KIAA0692                                                                     | -2,26 | 0,68 | 4,84 |
| 1561618_at        | --     | --       | --                                                                           | -2,26 | 0,57 | 4,84 |
| 1557--<br>55_s_at | --     | --       | --                                                                           | -2,26 | 0,62 | 4,84 |
| 210056_at         | 27289  | RND1     | Rho family GTPase 1                                                          | -2,26 | 0,56 | 4,84 |
| 223398_at         | 84270  | C9orf89  | chromosome 9 open reading frame 89                                           | -2,26 | 0,56 | 4,84 |
| 1552485_at        | 114294 | LACTB    | lactamase, beta                                                              | -2,26 | 0,61 | 4,84 |
| 229068_at         | 22948  | CCT5     | chaperonin containing TCP1, subunit 5 (epsilon)                              | -2,26 | 0,58 | 4,84 |
| 244679_at         | 11329  | STK38    | serine/threonine kinase 38                                                   | -2,26 | 0,56 | 4,84 |
| 222941_at         | 64752  | FLJ11850 | hypothetical protein FLJ11850                                                | -2,26 | 0,56 | 4,84 |
| 229780_at         | 9788   | MTSS1    | metastasis suppressor 1                                                      | -2,26 | 0,58 | 4,84 |
| 210180_s_at       | 6434   | SFRS10   | splicing factor, arginine/serine-rich 10 (transformer 2 homolog, Drosophila) | -2,26 | 0,60 | 4,84 |
| 233026_s_at       | 23037  | PDZD2    | PDZ domain containing 2                                                      | -2,26 | 0,55 | 4,84 |
| 223006_s_at       | 23731  | C9orf5   | chromosome 9 open reading frame 5                                            | -2,26 | 0,64 | 4,84 |
| 223288_at         | 84640  | USP38    | ubiquitin specific peptidase 38                                              | -2,25 | 0,64 | 4,84 |
| 223007_s_at       | 23731  | C9orf5   | chromosome 9 open reading frame 5                                            | -2,25 | 0,66 | 4,84 |
| 225199_at         | 29035  | C16orf72 | chromosome 16 open reading frame 72                                          | -2,25 | 0,66 | 4,84 |

|              |        |          |                                                                                      |       |      |      |
|--------------|--------|----------|--------------------------------------------------------------------------------------|-------|------|------|
| 218045_x_at  | 5763   | PTMS     | parathymosin                                                                         | -2,25 | 0,63 | 4,84 |
| 209211_at    | 688    | KLF5     | Kruppel-like factor 5 (intestinal)                                                   | -2,25 | 0,55 | 4,84 |
| 209325_s_at  | 6004   | RGS16    | regulator of G-protein signalling 16                                                 | -2,25 | 0,54 | 4,84 |
| 223046_at    | 54583  | EGLN1    | egl nine homolog 1 (C. elegans)                                                      | -2,25 | 0,68 | 4,84 |
| 1563407_x_at | 496    | ATP4B    | ATPase, H+/K+ exchanging, beta polypeptide                                           | -2,25 | 0,60 | 4,84 |
| 2251--7_at   | --     | --       | --                                                                                   | -2,25 | 0,62 | 4,84 |
| 214485_at    | 4956   | ODF1     | outer dense fiber of sperm tails 1                                                   | -2,25 | 0,56 | 4,84 |
| 213821_s_at  | --     | --       | --                                                                                   | -2,25 | 0,64 | 4,84 |
| 210836_x_at  | 5144   | PDE4D    | phosphodiesterase 4D, cAMP-specific (phosphodiesterase E3 dunce homolog, Drosophila) | -2,25 | 0,62 | 4,84 |
| 1556923_at   | 51     | ACOX1    | acyl-Coenzyme A oxidase 1, palmitoyl                                                 | -2,25 | 0,53 | 4,84 |
| 243094_at    | 387923 | C13orf21 | chromosome 13 open reading frame 21                                                  | -2,25 | 0,58 | 4,84 |
| 201421_s_at  | 79084  | WDR77    | WD repeat domain 77                                                                  | -2,25 | 0,64 | 4,84 |
| 227032_at    | 5362   | PLXNA2   | plexin A2                                                                            | -2,25 | 0,56 | 4,84 |
| 222262_s_at  | 55500  | ETNK1    | ethanolamine kinase 1                                                                | -2,25 | 0,58 | 4,84 |
| 222243_s_at  | 10766  | TOB2     | transducer of ERBB2, 2                                                               | -2,25 | 0,69 | 4,84 |
| 202958_at    | 5780   | PTPN9    | protein tyrosine phosphatase, non-receptor type 9                                    | -2,25 | 0,63 | 4,84 |
| 224802_at    | 54602  | NDFIP2   | Nedd4 family interacting protein 2                                                   | -2,25 | 0,64 | 4,84 |
| 206919_at    | 2005   | ELK4     | ELK4, ETS-domain protein (SRF accessory protein 1)                                   | -2,25 | 0,64 | 4,84 |
| 226194_at    | 283489 | C13orf8  | chromosome 13 open reading frame 8                                                   | -2,25 | 0,60 | 4,84 |
| 236436_at    | 283130 | SLC25A45 | solute carrier family 25, member 45                                                  | -2,25 | 0,56 | 4,84 |
| 207945_s_at  | 1453   | CSNK1D   | casein kinase 1, delta                                                               | -2,25 | 0,59 | 4,84 |
| 228062_at    | 266812 | NAP1L5   | nucleosome assembly protein 1-like 5                                                 | -2,25 | 0,60 | 4,84 |
| 203695_s_at  | 1687   | DFNA5    | deafness, autosomal dominant 5                                                       | -2,25 | 0,62 | 4,84 |
| 227697_at    | 9021   | SOCS3    | suppressor of cytokine signaling 3                                                   | -2,25 | 0,58 | 4,84 |
| 204837_at    | 66036  | MTMR9    | myotubularin related protein 9                                                       | -2,25 | 0,62 | 4,84 |
| 215113_s_at  | 26168  | SENP3    | SUMO1/sentrin/SMT3 specific peptidase 3                                              | -2,25 | 0,58 | 4,84 |
| 23622--_at   | --     | --       | --                                                                                   | -2,25 | 0,54 | 4,84 |
| 206771_at    | 7380   | UPK3A    | uropod protein 3A                                                                    | -2,25 | 0,63 | 4,84 |
| 208896_at    | 8886   | DDX18    | DEAD (Asp-Glu-Ala-Asp) box polypeptide 18                                            | -2,25 | 0,62 | 4,84 |

|             |                   |                      |                                                                                                           |       |      |      |
|-------------|-------------------|----------------------|-----------------------------------------------------------------------------------------------------------|-------|------|------|
| 214597_at   | 6752              | SSTR2                | somatostatin receptor 2                                                                                   | -2,25 | 0,58 | 4,84 |
| 238035_at   | 6670              | SP3                  | Sp3 transcription factor                                                                                  | -2,25 | 0,61 | 4,84 |
| 201573_s_at | 2107              | ETF1                 | eukaryotic translation termination factor 1                                                               | -2,25 | 0,64 | 4,84 |
| 239653_at   | 6242              | RTKN                 | rhotekin                                                                                                  | -2,25 | 0,55 | 4,84 |
| 225018_at   | 56907             | SPIRE1               | spire homolog 1 (Drosophila)                                                                              | -2,25 | 0,58 | 4,84 |
| 234322_at   | --                | --                   | --                                                                                                        | -2,25 | 0,59 | 4,84 |
| 204433_s_at | 9825              | SPATA2               | spermatogenesis associated 2                                                                              | -2,25 | 0,56 | 4,84 |
| 206231_at   | 3780              | KCNN1                | potassium intermediate/small conductance calcium-activated channel, subfamily N, member 1                 | -2,25 | 0,51 | 4,84 |
| 222799_at   | 29062             | WDR91                | WD repeat domain 91                                                                                       | -2,25 | 0,62 | 4,84 |
| 240108_at   | 23352             | UBR4                 | ubiquitin protein ligase E3 component n-recognin 4                                                        | -2,25 | 0,58 | 4,84 |
| 231414_at   | --                | --                   | --                                                                                                        | -2,24 | 0,57 | 4,84 |
| 210034_s_at | 388907//<br>/6125 | LOC388907///<br>RPL5 | similar to ribosomal protein L5///<br>ribosomal protein L5                                                | -2,24 | 0,65 | 4,84 |
| 225816_at   | 79960             | PHF17                | PHD finger protein 17                                                                                     | -2,24 | 0,66 | 4,84 |
| 232966_at   | 64900             | LPIN3                | lipin 3                                                                                                   | -2,24 | 0,57 | 4,84 |
| 214662_at   | 23160             | WDR43                | WD repeat domain 43                                                                                       | -2,24 | 0,68 | 4,84 |
| 243236_at   | 51095             | TRNT1                | tRNA nucleotidyl transferase, CCA-adding, 1                                                               | -2,24 | 0,55 | 4,84 |
| 216307_at   | 1607              | DGKB                 | diacylglycerol kinase, beta 90kDa                                                                         | -2,24 | 0,59 | 4,84 |
| 202066_at   | 8500              | PPFIA1               | protein tyrosine phosphatase, receptor type, f polypeptide (PTPRF), interacting protein (liprin), alpha 1 | -2,24 | 0,61 | 4,84 |
| 232--49_at  | --                | --                   | --                                                                                                        | -2,24 | 0,56 | 4,84 |
| 227133_at   | 139231            | CXorf39              | chromosome X open reading frame 39                                                                        | -2,24 | 0,64 | 4,84 |
| 240738_at   | 8829              | NRP1                 | neuropilin 1                                                                                              | -2,24 | 0,53 | 4,84 |
| 229421_s_at | 54502             | FLJ20273             | RNA-binding protein                                                                                       | -2,24 | 0,60 | 4,84 |
| 235747_at   | 8034              | SLC25A16             | solute carrier family 25 (mitochondrial carrier; Graves disease autoantigen), member 16                   | -2,24 | 0,63 | 4,84 |
| 229990_at   | 641467            | LOC641467            | hypothetical LOC641467                                                                                    | -2,24 | 0,63 | 4,84 |
| 223008_s_at | 23731             | C9orf5               | chromosome 9 open reading frame 5                                                                         | -2,24 | 0,69 | 4,84 |
| 243543_at   | 6307              | SC4MOL               | sterol-C4-methyl oxidase-like                                                                             | -2,24 | 0,55 | 4,84 |
| 244783_at   | 10138             | YAF2                 | YY1 associated factor 2                                                                                   | -2,24 | 0,56 | 4,84 |

|             |        |           |                                                                                            |       |      |      |
|-------------|--------|-----------|--------------------------------------------------------------------------------------------|-------|------|------|
| 1566166_at  | --     | --        | --                                                                                         | -2,24 | 0,55 | 4,84 |
| 204209_at   | 5130   | PCYT1A    | phosphate cytidyltransferase 1, choline, alpha                                             | -2,24 | 0,66 | 4,84 |
| 212437_at   | 1059   | CENPB     | centromere protein B, 80kDa                                                                | -2,24 | 0,66 | 4,84 |
| 223982_s_at | 50640  | PNPLA8    | patatin-like phospholipase domain containing 8                                             | -2,24 | 0,65 | 4,84 |
| 212495_at   | 23030  | JMJD2B    | jumonji domain containing 2B                                                               | -2,24 | 0,56 | 4,84 |
| 203157_s_at | 2744   | GLS       | glutaminase                                                                                | -2,24 | 0,62 | 4,84 |
| 204012_s_at | 9836   | LCMT2     | leucine carboxyl methyltransferase 2                                                       | -2,24 | 0,64 | 4,84 |
| 45749_at    | 79567  | FAM65A    | family with sequence similarity 65, member A                                               | -2,24 | 0,63 | 4,84 |
| 228973_at   | --     | --        | --                                                                                         | -2,24 | 0,57 | 4,84 |
| 207850_at   | 2921   | CXCL3     | chemokine (C-X-C motif) ligand 3                                                           | -2,24 | 0,50 | 4,84 |
| 1568827_at  | 401442 | LOC401442 | hypothetical gene supported by BC028401                                                    | -2,24 | 0,58 | 4,84 |
| 242482_at   | 5573   | PRKAR1A   | protein kinase, cAMP-dependent, regulatory, type I, alpha (tissue specific extinguisher 1) | -2,24 | 0,57 | 4,84 |
| 1566231_at  | --     | --        | --                                                                                         | -2,24 | 0,68 | 4,84 |
| 221592_at   | 11138  | TBC1D8    | TBC1 domain family, member 8 (with GRAM domain)                                            | -2,24 | 0,61 | 4,84 |
| 217248_s_at | 23428  | SLC7A8    | solute carrier family 7 (cationic amino acid transporter, y+ system), member 8             | -2,24 | 0,55 | 4,84 |
| 212575_at   | 91304  | C19orf6   | chromosome 19 open reading frame 6                                                         | -2,24 | 0,55 | 4,84 |
| 208093_s_at | 81565  | NDEL1     | nudE nuclear distribution gene E homolog (A. nidulans)-like 1                              | -2,24 | 0,62 | 4,84 |
| 203193_at   | 2101   | ESRRA     | estrogen-related receptor alpha                                                            | -2,24 | 0,59 | 4,84 |
| 228297_at   | 1266   | CNN3      | calponin 3, acidic                                                                         | -2,24 | 0,69 | 4,84 |
| 225847_at   | 57552  | AADACL1   | arylacetamide deacetylase-like 1                                                           | -2,24 | 0,64 | 4,84 |
| 230855_at   | 2626   | GATA4     | GATA binding protein 4                                                                     | -2,24 | 0,55 | 4,84 |
| 244103_at   | 163859 | C1orf55   | chromosome 1 open reading frame 55                                                         | -2,24 | 0,66 | 4,84 |
| 232025_at   | 9066   | SYT7      | synaptotagmin VII                                                                          | -2,24 | 0,54 | 4,84 |
| 226961_at   | 222171 | PRR15     | proline rich 15                                                                            | -2,24 | 0,58 | 4,84 |
| 217196_s_at | 23271  | CAMSAP1L1 | calmodulin regulated spectrin-associated protein 1-like 1                                  | -2,24 | 0,54 | 4,84 |
| 214528_s_at | 7849   | PAX8      | paired box 8                                                                               | -2,24 | 0,57 | 4,84 |

|                  |        |           |                                                                                       |       |      |      |
|------------------|--------|-----------|---------------------------------------------------------------------------------------|-------|------|------|
| 225854_x_at      | 359948 | IRF2BP2   | interferon regulatory factor 2 binding protein 2                                      | -2,24 | 0,62 | 4,84 |
| 238299_at        | 91012  | LASS5     | LAG1 homolog, ceramide synthase 5                                                     | -2,24 | 0,59 | 4,84 |
| 1563907_at       | 84253  | GARNL3    | GTPase activating Rap/RanGAP domain-like 3                                            | -2,23 | 0,56 | 4,84 |
| 204466_s_at      | 6622   | SNCA      | synuclein, alpha (non A4 component of amyloid precursor)                              | -2,23 | 0,56 | 4,84 |
| 212515_s_at      | 1654   | DDX3X     | DEAD (Asp-Glu-Ala-Asp) box polypeptide 3, X-linked                                    | -2,23 | 0,60 | 4,84 |
| 235592_at        | --     | --        | --                                                                                    | -2,23 | 0,58 | 4,84 |
| 228888_at        | 342667 | STAC2     | SH3 and cysteine rich domain 2                                                        | -2,23 | 0,59 | 4,84 |
| 222706_at        | 54883  | CCDC49    | coiled-coil domain containing 49                                                      | -2,23 | 0,58 | 4,84 |
| 213149_at        | 1737   | DLAT      | dihydrolipoamide S-acetyltransferase (E2 component of pyruvate dehydrogenase complex) | -2,23 | 0,65 | 4,84 |
| 230605_at        | 7881   | KCNAB1    | potassium voltage-gated channel, shaker-related subfamily, beta member 1              | -2,23 | 0,57 | 4,84 |
| 205993_s_at      | 6909   | TBX2      | T-box 2                                                                               | -2,23 | 0,57 | 4,84 |
| 22874--_at       | --     | --        | --                                                                                    | -2,23 | 0,62 | 4,84 |
| 226793_at        | 283267 | LOC283267 | hypothetical protein LOC283267                                                        | -2,23 | 0,53 | 4,84 |
| 234605_at        | 8555   | CDC14B    | CDC14 cell division cycle 14 homolog B ( <i>S. cerevisiae</i> )                       | -2,23 | 0,52 | 4,84 |
| 1555702_a_a<br>t | 6487   | ST3GAL3   | ST3 beta-galactoside alpha-2,3-sialyltransferase 3                                    | -2,23 | 0,59 | 4,84 |
| 229348_at        | 29914  | UBIAD1    | UbiA prenyltransferase domain containing 1                                            | -2,23 | 0,63 | 4,84 |
| 201018_at        | 1964   | EIF1AX    | eukaryotic translation initiation factor 1A, X-linked                                 | -2,23 | 0,67 | 4,84 |
| 218131_s_at      | 54815  | GATAD2A   | GATA zinc finger domain containing 2A                                                 | -2,23 | 0,67 | 4,84 |
| 220382_s_at      | 79822  | ARHGAP28  | Rho GTPase activating protein 28                                                      | -2,23 | 0,57 | 4,84 |
| 41660_at         | 9620   | CELSR1    | cadherin, EGF LAG seven-pass G-type receptor 1 (flamingo homolog, <i>Drosophila</i> ) | -2,23 | 0,63 | 4,84 |
| 1559121_s_at     | --     | --        | --                                                                                    | -2,23 | 0,59 | 4,84 |
| 237371_at        | 2782   | GNB1      | guanine nucleotide binding protein (G protein), beta polypeptide 1                    | -2,23 | 0,64 | 4,84 |
| 202133_at        | 25937  | WWTR1     | WW domain containing transcription regulator 1                                        | -2,23 | 0,63 | 4,84 |

|              |        |           |                                                                                      |       |      |      |
|--------------|--------|-----------|--------------------------------------------------------------------------------------|-------|------|------|
| 210512_s_at  | 7422   | VEGFA     | vascular endothelial growth factor A                                                 | -2,23 | 0,67 | 4,84 |
| 1555355_a_at | 2113   | ETS1      | v-ets erythroblastosis virus E26 oncogene homolog 1 (avian)                          | -2,23 | 0,58 | 4,84 |
| 212101_at    | 23633  | KPNA6     | karyopherin alpha 6 (importin alpha 7)                                               | -2,23 | 0,59 | 4,84 |
| 222688_at    | 55331  | PHCA      | phytoceramidase, alkaline                                                            | -2,23 | 0,64 | 4,84 |
| 208147_s_at  | 1558   | CYP2C8    | cytochrome P450, family 2, subfamily C, polypeptide 8                                | -2,23 | 0,54 | 4,84 |
| 214123_s_at  | 317648 | C4orf10   | chromosome 4 open reading frame 10                                                   | -2,23 | 0,66 | 4,84 |
| 2416--1_at   | --     | --        | --                                                                                   | -2,23 | 0,55 | 4,84 |
| 212623_at    | 440026 | TMEM41B   | transmembrane protein 41B                                                            | -2,23 | 0,63 | 4,84 |
| 212687_at    | 3987   | LIMS1     | LIM and senescent cell antigen-like domains 1                                        | -2,23 | 0,69 | 4,84 |
| 1554717_a_at | 5144   | PDE4D     | phosphodiesterase 4D, cAMP-specific (phosphodiesterase E3 dunce homolog, Drosophila) | -2,23 | 0,54 | 4,84 |
| 218856_at    | 27242  | TNFRSF21  | tumor necrosis factor receptor superfamily, member 21                                | -2,23 | 0,61 | 4,84 |
| 232184_at    | 57679  | ALS2      | amyotrophic lateral sclerosis 2 (juvenile)                                           | -2,23 | 0,55 | 4,84 |
| 203532_x_at  | 8065   | CUL5      | cullin 5                                                                             | -2,23 | 0,54 | 4,84 |
| 217184_s_at  | 4058   | LTK       | leukocyte tyrosine kinase                                                            | -2,23 | 0,68 | 4,84 |
| 234335_s_at  | 151354 | FAM84A    | family with sequence similarity 84, member A                                         | -2,23 | 0,57 | 4,84 |
| 235688_s_at  | 9618   | TRAF4     | TNF receptor-associated factor 4                                                     | -2,23 | 0,64 | 4,84 |
| 208500_x_at  | 27022  | FOXD3     | forkhead box D3                                                                      | -2,23 | 0,53 | 4,84 |
| 1557566_at   | 148987 | LOC148987 | hypothetical protein LOC148987                                                       | -2,23 | 0,53 | 4,84 |
| 240051_at    | 89882  | TPD52L3   | tumor protein D52-like 3                                                             | -2,23 | 0,62 | 4,84 |
| 203751_x_at  | 3727   | JUND      | jun D proto-oncogene                                                                 | -2,23 | 0,53 | 4,84 |
| 232108_at    | 79634  | SCRN3     | secernin 3                                                                           | -2,23 | 0,58 | 4,84 |
| 202181_at    | 9766   | KIAA0247  | KIAA0247                                                                             | -2,23 | 0,65 | 4,84 |
| 203027_s_at  | 4597   | MVD       | mevalonate (diphospho) decarboxylase                                                 | -2,23 | 0,53 | 4,84 |
| 240223_at    | 56606  | SLC2A9    | solute carrier family 2 (facilitated glucose transporter), member 9                  | -2,23 | 0,94 | 4,84 |
| 212194_s_at  | 9777   | TM9SF4    | transmembrane 9 superfamily protein member 4                                         | -2,23 | 0,62 | 4,84 |

|              |        |         |                                                                            |       |      |      |
|--------------|--------|---------|----------------------------------------------------------------------------|-------|------|------|
| 236082_at    | 284345 | PHLDB3  | pleckstrin homology-like domain, family B, member 3                        | -2,23 | 0,59 | 4,84 |
| 212294_at    | 55970  | GNG12   | guanine nucleotide binding protein (G protein), gamma 12                   | -2,22 | 0,69 | 4,84 |
| 237644_at    | 57706  | DENND1A | DENN/MADD domain containing 1A                                             | -2,22 | 0,54 | 4,84 |
| 220076_at    | 56172  | ANKH    | ankylosis, progressive homolog (mouse)                                     | -2,22 | 0,67 | 4,84 |
| 232916_at    | --     | --      | --                                                                         | -2,22 | 0,62 | 4,84 |
| 229771_at    | --     | --      | --                                                                         | -2,22 | 0,59 | 4,84 |
| 222629_at    | 51455  | REV1    | REV1 homolog ( <i>S. cerevisiae</i> )                                      | -2,22 | 0,63 | 4,84 |
| 224126_at    | 84068  | SLC10A7 | solute carrier family 10 (sodium/bile acid cotransporter family), member 7 | -2,22 | 0,65 | 4,84 |
| 202097_at    | 9972   | NUP153  | nucleoporin 153kDa                                                         | -2,22 | 0,70 | 4,84 |
| 242803_at    | 51232  | CRIM1   | cysteine rich transmembrane BMP regulator 1 (chordin-like)                 | -2,22 | 0,62 | 4,84 |
| 222251_s_at  | 26205  | GMEB2   | glucocorticoid modulatory element binding protein 2                        | -2,22 | 0,64 | 4,84 |
| 213263_s_at  | --     | --      | --                                                                         | -2,22 | 0,61 | 4,84 |
| 201132_at    | 3188   | HNRPH2  | heterogeneous nuclear ribonucleoprotein H2 (H')                            | -2,22 | 0,71 | 4,84 |
| 235907_at    | 55161  | TMEM33  | transmembrane protein 33                                                   | -2,22 | 0,65 | 4,84 |
| 209117_at    | 23558  | WBP2    | WW domain binding protein 2                                                | -2,22 | 0,62 | 4,84 |
| 227451_s_at  | --     | --      | --                                                                         | -2,22 | 0,60 | 4,84 |
| 1552486_s_at | 114294 | LACTB   | lactamase, beta                                                            | -2,22 | 0,64 | 4,84 |
| 201835_s_at  | 5564   | PRKAB1  | protein kinase, AMP-activated, beta 1 non-catalytic subunit                | -2,22 | 0,69 | 4,84 |
| 236836_at    | --     | --      | --                                                                         | -2,22 | 0,57 | 4,84 |
| 217552_x_at  | 1378   | CR1     | complement component (3b/4b) receptor 1 (Knops blood group)                | -2,22 | 0,55 | 4,84 |
| 212300_at    | 200081 | TXLNA   | taxilin alpha                                                              | -2,22 | 0,72 | 4,84 |
| 230076_at    | 54478  | FAM64A  | family with sequence similarity 64, member A                               | -2,22 | 0,65 | 4,84 |
| 226714_at    | 55095  | SAMD4B  | sterile alpha motif domain containing 4B                                   | -2,22 | 0,56 | 4,84 |
| 212993_at    | --     | --      | --                                                                         | -2,22 | 0,68 | 4,84 |
| 239381_at    | 5650   | KLK7    | kallikrein-related peptidase 7                                             | -2,22 | 0,48 | 4,84 |



|             |                   |                        |                                                                                                                                |       |      |      |
|-------------|-------------------|------------------------|--------------------------------------------------------------------------------------------------------------------------------|-------|------|------|
| 212178_s_at | 441253//<br>/9883 | LOC441253///<br>POM121 | nuclear envelope pore membrane LOC441253///POM121 membrane glycoprotein (rat)                                                  | -2,22 | 0,62 | 4,84 |
| 205398_s_at | 4088              | SMAD3                  | SMAD family member 3                                                                                                           | -2,22 | 0,54 | 4,84 |
| 211110_s_at | 367               | AR                     | androgen receptor (dihydrotestosterone receptor; testicular feminization; spinal and bulbar muscular atrophy; Kennedy disease) | -2,22 | 0,60 | 4,84 |
| 2297--1_at  | --                | --                     | --                                                                                                                             | -2,22 | 0,68 | 4,84 |
| 218947_s_at | 55149             | PAPD1                  | PAP associated domain containing 1                                                                                             | -2,22 | 0,65 | 4,84 |
| 224967_at   | 7357              | UGCG                   | UDP-glucose ceramide glucosyltransferase                                                                                       | -2,22 | 0,66 | 4,84 |
| 210804_x_at | 6546              | SLC8A1                 | solute carrier family 8 (sodium/calcium exchanger), member 1                                                                   | -2,22 | 0,66 | 4,84 |
| 201087_at   | 5829              | PXN                    | paxillin                                                                                                                       | -2,22 | 0,67 | 4,84 |
| 201191_at   | 5306              | PITPNA                 | phosphatidylinositol transfer protein, alpha                                                                                   | -2,22 | 0,67 | 4,84 |
| 212722_s_at | 23210             | JMJD6                  | jumonji domain containing 6                                                                                                    | -2,22 | 0,62 | 4,84 |
| 214875_x_at | 334               | APLP2                  | amyloid beta (A4) precursor-like protein 2                                                                                     | -2,22 | 0,64 | 4,84 |
| 236477_at   | 55660             | PRPF40A                | PRP40 pre-mRNA processing factor 40 homolog A ( <i>S. cerevisiae</i> )                                                         | -2,22 | 0,61 | 4,84 |
| 231686_at   | 2628              | GATM                   | glycine amidinotransferase (L-arginine:glycine amidinotransferase)                                                             | -2,22 | 0,54 | 4,84 |
| 244461_at   | 92521             | SPECC1                 | sperm antigen with calponin homology and coiled-coil domains 1                                                                 | -2,22 | 0,60 | 4,84 |
| 212267_at   | 23063             | WAPAL                  | wings apart-like homolog ( <i>Drosophila</i> )                                                                                 | -2,21 | 0,67 | 4,84 |
| 209704_at   | 22823             | MTF2                   | metal response element binding transcription factor 2                                                                          | -2,21 | 0,63 | 4,84 |
| 200878_at   | 2034              | EPAS1                  | endothelial PAS domain protein 1                                                                                               | -2,21 | 0,66 | 4,84 |
| 237398_at   | 23365             | ARHGEF12               | Rho guanine nucleotide exchange factor (GEF) 12                                                                                | -2,21 | 0,71 | 4,84 |
| 218670_at   | 80324             | PUS1                   | pseudouridylate synthase 1                                                                                                     | -2,21 | 0,60 | 4,84 |
| 218691_s_at | 8572              | PDLIM4                 | PDZ and LIM domain 4                                                                                                           | -2,21 | 0,56 | 4,84 |
| 15677--2_at | --                | --                     | --                                                                                                                             | -2,21 | 0,60 | 4,84 |
| 201460_at   | 9261              | MAPKAPK2               | mitogen-activated protein kinase-activated protein kinase 2                                                                    | -2,21 | 0,64 | 4,84 |
| 204455_at   | 667               | DST                    | dystonin                                                                                                                       | -2,21 | 0,56 | 4,84 |

|              |        |          |                                                                                                   |       |      |      |
|--------------|--------|----------|---------------------------------------------------------------------------------------------------|-------|------|------|
| 209101_at    | 1490   | CTGF     | connective tissue growth factor                                                                   | -2,21 | 0,55 | 4,84 |
| 1553101_a_at | 54890  | ALKBH5   | alkB, alkylation repair homolog 5 (E. coli)                                                       | -2,21 | 0,57 | 4,84 |
| 242192_at    | --     | --       | --                                                                                                | -2,21 | 0,63 | 4,84 |
| 221684_s_at  | 60506  | NYX      | nyctalopin                                                                                        | -2,21 | 0,58 | 4,84 |
| 225443_at    | 55802  | DCP1A    | DCP1 decapping enzyme homolog A (S. cerevisiae)                                                   | -2,21 | 0,65 | 4,84 |
| 233504_at    | 158401 | C9orf84  | chromosome 9 open reading frame 84                                                                | -2,21 | 0,57 | 4,84 |
| 206588_at    | 1618   | DAZL     | deleted in azoospermia-like                                                                       | -2,21 | 0,63 | 4,84 |
| 1564333_a_at | 57537  | SORCS2   | sortilin-related VPS10 domain containing receptor 2                                               | -2,21 | 0,59 | 4,84 |
| 225299_at    | 4645   | MYO5B    | myosin VB                                                                                         | -2,21 | 0,68 | 4,84 |
| 24--128_at   | --     | --       | --                                                                                                | -2,21 | 0,64 | 4,84 |
| 223986_x_at  | 10655  | DMRT2    | doublesex and mab-3 related transcription factor 2                                                | -2,21 | 0,56 | 4,84 |
| 206976_s_at  | 10808  | HSPH1    | heat shock 105kDa/110kDa protein 1                                                                | -2,21 | 0,65 | 4,84 |
| 242727_at    | 221079 | ARL5B    | ADP-ribosylation factor-like 5B                                                                   | -2,21 | 0,54 | 4,84 |
| 1561891_at   | --     | --       | --                                                                                                | -2,21 | 0,62 | 4,84 |
| 201793_x_at  | 9887   | SMG7     | Smg-7 homolog, nonsense mediated mRNA decay factor (C. elegans)                                   | -2,21 | 0,58 | 4,84 |
| 234988_at    | 80124  | VCPIP1   | valosin containing protein (p97)/p47 complex interacting protein 1                                | -2,21 | 0,63 | 4,84 |
| 212923_s_at  | 221749 | C6orf145 | chromosome 6 open reading frame 145                                                               | -2,21 | 0,59 | 4,84 |
| 205473_at    | 525    | ATP6V1B1 | ATPase, H+ transporting, lysosomal 56/58kDa, V1 subunit B1 (Renal tubular acidosis with deafness) | -2,21 | 0,58 | 4,84 |
| 234431_at    | --     | --       | --                                                                                                | -2,21 | 0,61 | 4,84 |
| 217955_at    | 23786  | BCL2L13  | BCL2-like 13 (apoptosis facilitator)                                                              | -2,21 | 0,62 | 4,84 |
| 23--78--_at  | --     | --       | --                                                                                                | -2,21 | 0,64 | 4,84 |
| 209850_s_at  | 10435  | CDC42EP2 | CDC42 effector protein (Rho GTPase binding) 2                                                     | -2,21 | 0,59 | 4,84 |
| 202794_at    | 3628   | INPP1    | inositol polyphosphate-1-phosphatase                                                              | -2,21 | 0,63 | 4,84 |
| 205676_at    | 1594   | CYP27B1  | cytochrome P450, family 27, subfamily B, polypeptide 1                                            | -2,21 | 0,46 | 4,84 |
| 214787_at    | 10260  | DENND4A  | DENN/MADD domain containing 4A                                                                    | -2,21 | 0,60 | 4,84 |

|              |        |           |                                                                                                 |       |      |      |
|--------------|--------|-----------|-------------------------------------------------------------------------------------------------|-------|------|------|
| 228132_at    | 84448  | ABLIM2    | actin binding LIM protein family, member 2                                                      | -2,21 | 0,53 | 4,84 |
| 235930_at    | 27345  | KCNMB4    | potassium large conductance calcium-activated channel, subfamily M, beta member 4               | -2,21 | 0,58 | 4,84 |
| 203234_at    | 7378   | UPP1      | uridine phosphorylase 1                                                                         | -2,21 | 0,57 | 4,84 |
| 224991_at    | 80790  | CMIP      | c-Maf-inducing protein                                                                          | -2,21 | 0,60 | 4,84 |
| 1560874_at   | 440074 | FLJ33046  | hypothetical gene supported by AK057608                                                         | -2,21 | 0,56 | 4,84 |
| 223055_s_at  | 57510  | XPO5      | exportin 5                                                                                      | -2,21 | 0,63 | 4,84 |
| 214962_s_at  | 23279  | NUP160    | nucleoporin 160kDa                                                                              | -2,21 | 0,55 | 4,84 |
| 220426_at    | 79025  | C20orf195 | chromosome 20 open reading frame 195                                                            | -2,21 | 0,66 | 4,84 |
| 241924_at    | 4204   | MECP2     | methyl CpG binding protein 2 (Rett syndrome)                                                    | -2,21 | 0,60 | 4,84 |
| 46270_at     | 51271  | UBAP1     | ubiquitin associated protein 1                                                                  | -2,21 | 0,68 | 4,84 |
| 24--57--_at  | --     | --        | --                                                                                              | -2,21 | 0,58 | 4,84 |
| 209636_at    | 4791   | NFKB2     | nuclear factor of kappa light polypeptide gene enhancer in B-cells 2 (p49/p100)                 | -2,21 | 0,65 | 4,84 |
| 238176_at    | 9693   | RAPGEF2   | Rap guanine nucleotide exchange factor (GEF) 2                                                  | -2,21 | 0,60 | 4,84 |
| 225855_at    | 57669  | EPB41L5   | erythrocyte membrane protein band 4.1 like 5                                                    | -2,20 | 0,67 | 4,84 |
| 201791_s_at  | 1717   | DHCR7     | 7-dehydrocholesterol reductase                                                                  | -2,20 | 0,55 | 4,84 |
| 235528_at    | 2979   | GUCA1B    | guanylate cyclase activator 1B (retina)                                                         | -2,20 | 0,58 | 4,84 |
| 228746_s_at  | 55573  | CDV3      | CDV3 homolog (mouse)                                                                            | -2,20 | 0,57 | 4,84 |
| 1554491_a_at | 462    | SERPINC1  | serpin peptidase inhibitor, clade C (antithrombin), member 1                                    | -2,20 | 0,58 | 4,84 |
| 201160_s_at  | 8531   | CSDA      | cold shock domain protein A                                                                     | -2,20 | 0,67 | 4,84 |
| 209396_s_at  | 1116   | CHI3L1    | chitinase 3-like 1 (cartilage glycoprotein-39)                                                  | -2,20 | 0,38 | 4,84 |
| 235333_at    | 9331   | B4GALT6   | UDP-Gal:betaGlcNAc beta 1,4- galactosyltransferase, polypeptide 6                               | -2,20 | 0,60 | 4,84 |
| 228087_at    | 90693  | CCDC126   | coiled-coil domain containing 126                                                               | -2,20 | 0,65 | 4,84 |
| 202733_at    | 8974   | P4HA2     | procollagen-proline, 2-oxoglutarate 4-dioxygenase (proline 4-hydroxylase), alpha polypeptide II | -2,20 | 0,56 | 4,84 |
| 229272_at    | 23360  | FNBP4     | formin binding protein 4                                                                        | -2,20 | 0,60 | 4,84 |

|              |        |           |                                                                       |       |      |      |
|--------------|--------|-----------|-----------------------------------------------------------------------|-------|------|------|
| 228894_at    | 253842 | LOC253842 | hypothetical protein LOC253842                                        | -2,20 | 0,56 | 4,84 |
| 203747_at    | 360    | AQP3      | aquaporin 3 (Gill blood group)                                        | -2,20 | 0,57 | 4,84 |
| 238719_at    | 5515   | PPP2CA    | protein phosphatase 2 (formerly 2A), catalytic subunit, alpha isoform | -2,20 | 0,62 | 4,84 |
| 210461_s_at  | 3983   | ABLIM1    | actin binding LIM protein 1                                           | -2,20 | 0,63 | 4,84 |
| 212977_at    | 57007  | CXCR7     | chemokine (C-X-C motif) receptor 7                                    | -2,20 | 0,65 | 4,84 |
| 223504_at    | 51277  | RBJ       | Ras-associated protein Rap1                                           | -2,20 | 0,56 | 4,84 |
| 239668_at    | 11010  | GLIPR1    | GLI pathogenesis-related 1 (glioma)                                   | -2,20 | 0,65 | 4,84 |
| 244471_x_at  | 56666  | PANX2     | pannexin 2                                                            | -2,20 | 0,55 | 4,84 |
| 224832_at    | 80824  | DUSP16    | dual specificity phosphatase 16                                       | -2,20 | 0,59 | 4,84 |
| 1558354_s_at | --     | --        | --                                                                    | -2,20 | 0,57 | 4,84 |
| 234592_at    | --     | --        | --                                                                    | -2,20 | 0,56 | 4,84 |
| 224534_at    | 83999  | KREMEN1   | kringle containing transmembrane protein 1                            | -2,20 | 0,55 | 4,84 |
| 203843_at    | 6197   | RPS6KA3   | ribosomal protein S6 kinase, 90kDa, polypeptide 3                     | -2,20 | 0,63 | 4,84 |
| 60794_f_at   | 400721 | ZNF814    | zinc finger protein 814                                               | -2,20 | 0,59 | 4,84 |
| 1563219_at   | --     | --        | --                                                                    | -2,20 | 0,59 | 4,84 |
| 206157_at    | 5806   | PTX3      | pentraxin-related gene, rapidly induced by IL-1 beta                  | -2,20 | 0,66 | 4,84 |
| 230319_at    | 79625  | C4orf31   | chromosome 4 open reading frame 31                                    | -2,20 | 0,45 | 4,84 |
| 224612_s_at  | 80331  | DNAJC5    | DnaJ (Hsp40) homolog, subfamily C, member 5                           | -2,20 | 0,59 | 4,84 |
| 226305_at    | 66004  | LYNX1     | Ly6/neurotoxin 1                                                      | -2,20 | 0,64 | 4,84 |
| 228583_at    | 91750  | LIN52     | lin-52 homolog (C. elegans)                                           | -2,20 | 0,54 | 4,84 |
| 235620_x_at  | 9205   | ZMYM5     | zinc finger, MYM-type 5                                               | -2,20 | 0,61 | 4,84 |
| 232012_at    | 823    | CAPN1     | calpain 1, (mu/l) large subunit                                       | -2,20 | 0,55 | 4,84 |
| 204624_at    | 540    | ATP7B     | ATPase, Cu <sup>++</sup> transporting, beta polypeptide               | -2,20 | 0,67 | 4,84 |
| 210561_s_at  | 26118  | WSB1      | WD repeat and SOCS box-containing 1                                   | -2,20 | 0,65 | 4,84 |
| 233423_at    | 57707  | KIAA1609  | KIAA1609                                                              | -2,20 | 0,54 | 4,84 |
| 201250_s_at  | 6513   | SLC2A1    | solute carrier family 2 (facilitated glucose transporter), member 1   | -2,20 | 0,57 | 4,84 |
| 32094_at     | 9469   | CHST3     | carbohydrate (chondroitin 6) sulfotransferase 3                       | -2,20 | 0,62 | 4,84 |

|              |        |           |                                                                                             |       |      |      |
|--------------|--------|-----------|---------------------------------------------------------------------------------------------|-------|------|------|
| 227511_at    | 54623  | PAF1      | Paf1, RNA polymerase II associated factor, homolog ( <i>S. cerevisiae</i> )                 | -2,20 | 0,65 | 4,84 |
| 241731_x_at  | 126070 | ZNF440    | zinc finger protein 440                                                                     | -2,20 | 0,60 | 4,84 |
| 231820_x_at  | 84914  | ZNF587    | zinc finger protein 587                                                                     | -2,20 | 0,61 | 4,84 |
| 201677_at    | 56941  | C3orf37   | chromosome 3 open reading frame 37                                                          | -2,20 | 0,59 | 4,84 |
| 1558761_a_at | 158293 | FAM120AOS | family with sequence similarity 120A opposite strand                                        | -2,20 | 0,61 | 4,84 |
| 211289_x_at  | 984    | CDC2L1    | cell division cycle 2-like 1 (PITSLRE proteins)                                             | -2,20 | 0,65 | 4,84 |
| 22--728_at   | --     | --        | --                                                                                          | -2,19 | 0,51 | 4,84 |
| 1559634_at   | 1131   | CHRM3     | cholinergic receptor, muscarinic 3                                                          | -2,19 | 0,56 | 4,84 |
| 209951_s_at  | 5609   | MAP2K7    | mitogen-activated protein kinase kinase 7                                                   | -2,19 | 0,58 | 4,84 |
| 202460_s_at  | 9663   | LPIN2     | lipin 2                                                                                     | -2,19 | 0,69 | 4,84 |
| 229225_at    | 8828   | NRP2      | neuropilin 2                                                                                | -2,19 | 0,64 | 4,84 |
| 236916_at    | --     | --        | --                                                                                          | -2,19 | 0,61 | 4,84 |
| 234986_at    | 2730   | GCLM      | glutamate-cysteine ligase, modifier subunit                                                 | -2,19 | 0,58 | 4,84 |
| 1552789_at   | 7095   | TLOC1     | translocation protein 1                                                                     | -2,19 | 0,60 | 4,84 |
| 23--159_at   | --     | --        | --                                                                                          | -2,19 | 0,53 | 4,84 |
| 217171_at    | 6609   | SMPD1     | sphingomyelin phosphodiesterase 1, acid lysosomal (acid sphingomyelinase)                   | -2,19 | 0,60 | 4,84 |
| 237097_at    | 51332  | SPTBN5    | spectrin, beta, non-erythrocytic 5                                                          | -2,19 | 0,60 | 4,84 |
| 235251_at    | --     | --        | --                                                                                          | -2,19 | 0,54 | 4,84 |
| 242445_at    | 121512 | FGD4      | FYVE, RhoGEF and PH domain containing 4                                                     | -2,19 | 0,59 | 4,84 |
| 1554694_at   | 219771 | CCNY      | cyclin Y                                                                                    | -2,19 | 0,59 | 4,84 |
| 213184_at    | 22916  | NCBP2     | nuclear cap binding protein subunit 2, 20kDa                                                | -2,19 | 0,68 | 4,84 |
| 205264_at    | 10849  | CD3EAP    | CD3e molecule, epsilon associated protein                                                   | -2,19 | 0,59 | 4,84 |
| 1558688_at   | 441461 | LOC441461 | hypothetical gene supported by BC030123                                                     | -2,19 | 0,61 | 4,84 |
| 210527_x_at  | 7278   | TUBA3C    | tubulin, alpha 3c                                                                           | -2,19 | 0,67 | 4,84 |
| 244519_at    | 171023 | ASXL1     | additional sex combs like 1 ( <i>Drosophila</i> )                                           | -2,19 | 0,57 | 4,84 |
| 225323_at    | 200014 | CC2D1B    | coiled-coil and C2 domain containing 1B                                                     | -2,19 | 0,59 | 4,84 |
| 225418_at    | 5819   | PVRL2     | poliovirus receptor-related 2 (herpesvirus entry mediator B)                                | -2,19 | 0,67 | 4,84 |
| 236561_at    | 7046   | TGFBR1    | transforming growth factor, beta receptor I (activin A receptor type II-like kinase, 53kDa) | -2,19 | 0,60 | 4,84 |

|              |                    |                    |                                                                                                   |       |      |      |
|--------------|--------------------|--------------------|---------------------------------------------------------------------------------------------------|-------|------|------|
| 239650_at    | 344148             | NAP5               | Nck-associated protein 5                                                                          | -2,19 | 0,61 | 4,84 |
| 202419_at    | 2531               | FVT1               | follicular lymphoma variant translocation 1                                                       | -2,19 | 0,68 | 4,84 |
| 1556059_s_at | 23013              | SPEN               | spen homolog, transcriptional regulator (Drosophila)                                              | -2,19 | 0,63 | 4,84 |
| 228546_at    | 1804               | DPP6               | dipeptidyl-peptidase 6                                                                            | -2,19 | 0,57 | 4,84 |
| 227931_at    | --                 | --                 | --                                                                                                | -2,19 | 0,61 | 4,84 |
| 229645_at    | 125704             | C18orf51           | chromosome 18 open reading frame 51                                                               | -2,19 | 0,60 | 4,84 |
| 214326_x_at  | 3727               | JUND               | jun D proto-oncogene                                                                              | -2,19 | 0,58 | 4,84 |
| 214739_at    | 84859              | LRCH3              | leucine-rich repeats and calponin homology (CH) domain containing 3                               | -2,19 | 0,65 | 4,84 |
| 212119_at    | 23433              | RHOQ               | ras homolog gene family, member Q                                                                 | -2,19 | 0,67 | 4,84 |
| 229594_at    | 144108             | SPTY2D1            | SPT2, Suppressor of Ty, domain containing 1 (S. cerevisiae)                                       | -2,19 | 0,70 | 4,84 |
| 225354_s_at  | 83699              | SH3BGR2            | SH3 domain binding glutamic acid-rich protein like 2                                              | -2,19 | 0,64 | 4,84 |
| 203223_at    | 9135               | RABEP1             | rabaptin, RAB GTPase binding effector protein 1                                                   | -2,19 | 0,65 | 4,84 |
| 232813_s_at  | 342096//<br>/55889 | GOLGA6///GO<br>LGA | golgi autoantigen, golgin subfamily a, 6///golgin-like protein                                    | -2,19 | 0,52 | 4,84 |
| 217924_at    | 64771              | C6orf106           | chromosome 6 open reading frame 106                                                               | -2,19 | 0,53 | 4,84 |
| 223694_at    | 81786              | TRIM7              | tripartite motif-containing 7                                                                     | -2,19 | 0,59 | 4,84 |
| 225034_at    | 286167             | LOC286167          | hypothetical protein LOC286167                                                                    | -2,19 | 0,62 | 4,84 |
| 212295_s_at  | 6541               | SLC7A1             | solute carrier family 7 (cationic amino acid transporter, y+ system), member 1                    | -2,19 | 0,62 | 4,84 |
| 229858_at    | --                 | --                 | --                                                                                                | -2,19 | 0,59 | 4,84 |
| 201411_s_at  | 55041              | PLEKHB2            | pleckstrin homology domain containing, family B (evectins) member 2                               | -2,19 | 0,63 | 4,84 |
| 209105_at    | 8648               | NCOA1              | nuclear receptor coactivator 1                                                                    | -2,19 | 0,67 | 4,84 |
| 225328_at    | 114907             | FBXO32             | F-box protein 32                                                                                  | -2,19 | 0,66 | 4,84 |
| 217873_at    | 51719              | CAB39              | calcium binding protein 39                                                                        | -2,18 | 0,67 | 4,84 |
| 203183_s_at  | 6602               | SMARCD1            | SWI/SNF related, matrix associated, actin dependent regulator of chromatin, subfamily d, member 1 | -2,18 | 0,58 | 4,84 |

|                  |        |          |                                                                                              |       |      |      |
|------------------|--------|----------|----------------------------------------------------------------------------------------------|-------|------|------|
| 216733_s_at      | 2628   | GATM     | glycine amidinotransferase (L-arginine:glycine amidinotransferase)                           | -2,18 | 0,62 | 4,84 |
| 209789_at        | 10391  | CORO2B   | coronin, actin binding protein, 2B                                                           | -2,18 | 0,55 | 4,84 |
| 228836_at        | 399512 | SLC25A35 | solute carrier family 25, member 35                                                          | -2,18 | 0,58 | 4,84 |
| 235496_at        | --     | --       | --                                                                                           | -2,18 | 0,75 | 4,84 |
| 212125_at        | 5905   | RANGAP1  | Ran GTPase activating protein 1                                                              | -2,18 | 0,55 | 4,84 |
| 201282_at        | 4967   | OGDH     | oxoglutarate (alpha-ketoglutarate) dehydrogenase (lipoamide)                                 | -2,18 | 0,60 | 4,84 |
| 216240_at        | 5820   | PVT1     | Pvt1 oncogene homolog, MYC activator (mouse)                                                 | -2,18 | 0,59 | 4,84 |
| 224502_s_at      | 57179  | KIAA1191 | KIAA1191                                                                                     | -2,18 | 0,65 | 4,84 |
| 1555274_a_a<br>t | 85465  | SELI     | selenoprotein I                                                                              | -2,18 | 0,57 | 4,84 |
| 226837_at        | 161742 | SPRED1   | sprouty-related, EVH1 domain containing 1                                                    | -2,18 | 0,59 | 4,84 |
| 212655_at        | 23174  | ZCCHC14  | zinc finger, CCHC domain containing 14                                                       | -2,18 | 0,63 | 4,84 |
| 221898_at        | 10630  | PDPN     | podoplanin                                                                                   | -2,18 | 0,56 | 4,84 |
| 202236_s_at      | 6566   | SLC16A1  | solute carrier family 16, member 1 (monocarboxylic acid transporter 1)                       | -2,18 | 0,57 | 4,84 |
| 209152_s_at      | 6929   | TCF3     | transcription factor 3 (E2A immunoglobulin enhancer binding factors E12/E47)                 | -2,18 | 0,60 | 4,84 |
| 1562624_at       | 28992  | LRP16    | LRP16 protein                                                                                | -2,18 | 0,58 | 4,84 |
| 23---67_at       | --     | --       | --                                                                                           | -2,18 | 0,58 | 4,84 |
| 235145_at        | 127579 | DCST2    | DC-STAMP domain containing 2                                                                 | -2,18 | 0,52 | 4,84 |
| 218923_at        | 1486   | CTBS     | chitobiase, di-N-acetyl-                                                                     | -2,18 | 0,66 | 4,84 |
| 226-95_s_at      | --     | --       | --                                                                                           | -2,18 | 0,62 | 4,84 |
| 242865_at        | 27020  | NPTN     | neuroplastin                                                                                 | -2,18 | 0,60 | 4,84 |
| 226798_at        | 23786  | BCL2L13  | BCL2-like 13 (apoptosis facilitator)                                                         | -2,18 | 0,51 | 4,84 |
| 22--494_s_at     | --     | --       | --                                                                                           | -2,18 | 0,55 | 4,84 |
| 209941_at        | 8737   | RIPK1    | receptor (TNFRSF)-interacting serine-threonine kinase 1                                      | -2,18 | 0,61 | 4,84 |
| 219024_at        | 59338  | PLEKHA1  | pleckstrin homology domain containing, family A (phosphoinositide binding specific) member 1 | -2,18 | 0,61 | 4,84 |
| 208316_s_at      | 4952   | OCRL     | oculocerebrorenal syndrome of Lowe                                                           | -2,18 | 0,64 | 4,84 |
| 212536_at        | 23200  | ATP11B   | ATPase, Class VI, type 11B                                                                   | -2,18 | 0,72 | 4,84 |

|                |        |          |                                                                                  |       |      |      |
|----------------|--------|----------|----------------------------------------------------------------------------------|-------|------|------|
| 237136_at      | 4643   | MYO1E    | myosin IE                                                                        | -2,18 | 0,57 | 4,84 |
| 223540_at      | 81607  | PVRL4    | poliovirus receptor-related 4                                                    | -2,18 | 0,61 | 4,84 |
| 231511_at      | 80144  | FRAS1    | Fraser syndrome 1                                                                | -2,18 | 0,64 | 4,84 |
| 211231_x_at    | 1579   | CYP4A11  | cytochrome P450, family 4, subfamily A, polypeptide 11                           | -2,18 | 0,54 | 4,84 |
| 243874_at      | 401105 | FLJ42393 | hypothetical LOC401105                                                           | -2,18 | 0,55 | 4,84 |
| 239268_at      | --     | --       | --                                                                               | -2,18 | 0,58 | 4,84 |
| 1554132_a_at   | 54462  | KIAA1128 | KIAA1128                                                                         | -2,18 | 0,60 | 4,84 |
| 224798_s_at    | 57184  | C15orf17 | chromosome 15 open reading frame 17                                              | -2,18 | 0,59 | 4,84 |
| 204473_s_at    | 9640   | ZNF592   | zinc finger protein 592                                                          | -2,18 | 0,57 | 4,84 |
| 222456_s_at    | 51474  | LIMA1    | LIM domain and actin binding 1                                                   | -2,18 | 0,67 | 4,84 |
| 1558896_at     | 200205 | C1orf69  | chromosome 1 open reading frame 69                                               | -2,18 | 0,61 | 4,84 |
| 1553180_at     | 171019 | ADAMTS19 | ADAM metallopeptidase with thrombospondin type 1 motif, 19                       | -2,18 | 0,57 | 4,84 |
| 243213_at      | 6774   | STAT3    | signal transducer and activator of transcription 3 (acute-phase response factor) | -2,18 | 0,60 | 4,84 |
| 212644_s_at    | 93487  | C14orf32 | chromosome 14 open reading frame 32                                              | -2,18 | 0,65 | 4,84 |
| 222270_at      | 57223  | SMEK2    | SMEK homolog 2, suppressor of mek1 (Dictyostelium)                               | -2,18 | 0,63 | 4,84 |
| 204621_s_at    | 4929   | NR4A2    | nuclear receptor subfamily 4, group A, member 2                                  | -2,18 | 0,54 | 4,84 |
| 227197_at      | 26084  | SGEF     | Src homology 3 domain-containing guanine nucleotide exchange factor              | -2,18 | 0,59 | 4,84 |
| 219225_at      | 79605  | PGBD5    | piggyBac transposable element derived 5                                          | -2,18 | 0,62 | 4,84 |
| 206233_at      | 9331   | B4GALT6  | UDP-Gal:betaGlcNAc beta 1,4- galactosyltransferase, polypeptide 6                | -2,17 | 0,56 | 4,84 |
| 15598----_a_at | --     | --       | --                                                                               | -2,17 | 0,59 | 4,84 |
| 229321_s_at    | 637    | BID      | BH3 interacting domain death agonist                                             | -2,17 | 0,61 | 4,84 |
| 224908_s_at    | 150465 | TTL      | tubulin tyrosine ligase                                                          | -2,17 | 0,61 | 4,84 |
| 208461_at      | 3090   | HIC1     | hypermethylated in cancer 1                                                      | -2,17 | 0,61 | 4,84 |
| 236542_at      | --     | --       | --                                                                               | -2,17 | 0,60 | 4,84 |
| 227900_at      | 868    | CBLB     | Cas-Br-M (murine) ecotropic retroviral transforming sequence b                   | -2,17 | 0,64 | 4,84 |



|                  |        |                   |                                                                                |       |      |      |
|------------------|--------|-------------------|--------------------------------------------------------------------------------|-------|------|------|
| 225166_at        | 93663  | ARHGAP18          | Rho GTPase activating protein 18                                               | -2,17 | 0,60 | 4,84 |
| 230352_at        | 5634   | PRPS2             | phosphoribosyl pyrophosphate synthetase 2                                      | -2,17 | 0,58 | 4,84 |
| 214917_at        | 5562   | PRKAA1            | protein kinase, AMP-activated, alpha 1 catalytic subunit                       | -2,17 | 0,61 | 4,84 |
| 232471_at        | --     | --                | --                                                                             | -2,17 | 0,57 | 4,84 |
| 24--881_at       | --     | --                | --                                                                             | -2,17 | 0,60 | 4,84 |
| 1552657_a_a<br>t | 84203  | TXNDC2            | thioredoxin domain containing 2 (spermatzoa)                                   | -2,17 | 0,62 | 4,84 |
| 230101_at        | 2920   | CXCL2             | chemokine (C-X-C motif) ligand 2                                               | -2,17 | 0,58 | 4,84 |
| 230006_s_at      | 258010 | DKFZp313A24<br>32 | hypothetical protein DKFZp313A2432                                             | -2,17 | 0,66 | 4,84 |
| 208394_x_at      | 11082  | ESM1              | endothelial cell-specific molecule 1                                           | -2,17 | 0,54 | 4,84 |
| 226145_s_at      | 80144  | FRAS1             | Fraser syndrome 1                                                              | -2,17 | 0,63 | 4,84 |
| 206408_at        | 26045  | LRRTM2            | leucine rich repeat transmembrane neuronal 2                                   | -2,17 | 0,61 | 4,84 |
| 207773_x_at      | 64816  | CYP3A43           | cytochrome P450, family 3, subfamily A, polypeptide 43                         | -2,17 | 0,53 | 4,84 |
| 238070_at        | 9557   | CHD1L             | chromodomain helicase DNA binding protein 1-like                               | -2,17 | 0,60 | 4,84 |
| 238321_at        | 8463   | TEAD2             | TEA domain family member 2                                                     | -2,17 | 0,66 | 4,84 |
| 222236_s_at      | 55616  | DDEF1L1           | development and differentiation enhancing factor-like 1                        | -2,17 | 0,65 | 4,84 |
| 1552931_a_a<br>t | 5151   | PDE8A             | phosphodiesterase 8A                                                           | -2,17 | 0,66 | 4,84 |
| 1562665_at       | --     | --                | --                                                                             | -2,17 | 0,60 | 4,84 |
| 235430_at        | 91748  | C14orf43          | chromosome 14 open reading frame 43                                            | -2,17 | 0,60 | 4,84 |
| 214239_x_at      | 7703   | PCGF2             | polycomb group ring finger 2                                                   | -2,17 | 0,67 | 4,84 |
| 1568903_at       | 51366  | UBR5              | ubiquitin protein ligase E3 component n-recogin 5                              | -2,17 | 0,61 | 4,84 |
| 210224_at        | 3140   | MR1               | major histocompatibility complex, class I-related                              | -2,17 | 0,60 | 4,84 |
| 211882_x_at      | 2528   | FUT6              | fucosyltransferase 6 (alpha (1,3) fucosyltransferase)                          | -2,17 | 0,59 | 4,84 |
| 208667_s_at      | 6767   | ST13              | suppression of tumorigenicity 13 (colon carcinoma) (Hsp70 interacting protein) | -2,17 | 0,70 | 4,84 |

|              |        |         |                                                                            |       |      |      |
|--------------|--------|---------|----------------------------------------------------------------------------|-------|------|------|
| 1559917_a_at | 388822 | MEMO1P  | mediator of cell motility 1 pseudogene                                     | -2,17 | 0,54 | 4,84 |
| 15553--3_at  | --     | --      | --                                                                         | -2,16 | 0,63 | 4,84 |
| 205142_x_at  | 215    | ABCD1   | ATP-binding cassette, sub-family D (ALD), member 1                         | -2,16 | 0,60 | 4,84 |
| 240684_at    | 23094  | SIPA1L3 | signal-induced proliferation-associated 1 like 3                           | -2,16 | 0,72 | 4,84 |
| 217268_at    | 7879   | RAB7A   | RAB7A, member RAS oncogene family                                          | -2,16 | 0,57 | 4,84 |
| 205074_at    | 6584   | SLC22A5 | solute carrier family 22 (organic cation transporter), member 5            | -2,16 | 0,66 | 4,84 |
| 201727_s_at  | 1994   | ELAVL1  | ELAV (embryonic lethal, abnormal vision, Drosophila)-like 1 (Hu antigen R) | -2,16 | 0,57 | 4,84 |
| 223302_s_at  | 79027  | ZNF655  | zinc finger protein 655                                                    | -2,16 | 0,65 | 4,84 |
| 202572_s_at  | 22839  | DLGAP4  | discs, large (Drosophila) homolog-associated protein 4                     | -2,16 | 0,59 | 4,84 |
| 225792_at    | 51361  | HOOK1   | hook homolog 1 (Drosophila)                                                | -2,16 | 0,66 | 4,84 |
| 201599_at    | 4942   | OAT     | ornithine aminotransferase (gyrate atrophy)                                | -2,16 | 0,66 | 4,84 |
| 1554199_at   | 5800   | PTPRO   | protein tyrosine phosphatase, receptor type, O                             | -2,16 | 0,57 | 4,84 |
| 201142_at    | 1965   | EIF2S1  | eukaryotic translation initiation factor 2, subunit 1 alpha, 35kDa         | -2,16 | 0,68 | 4,84 |
| 1552873_s_at | 80161  | CXYorf2 | chromosome X and Y open reading frame 2                                    | -2,16 | 0,57 | 4,84 |
| 237914_s_at  | 55209  | SETD5   | SET domain containing 5                                                    | -2,16 | 0,64 | 4,84 |
| 212712_at    | 157922 | CAMSAP1 | calmodulin regulated spectrin-associated protein 1                         | -2,16 | 0,63 | 4,84 |
| 228982_s_at  | 84132  | USP42   | ubiquitin specific peptidase 42                                            | -2,16 | 0,62 | 4,84 |
| 213417_at    | 6909   | TBX2    | T-box 2                                                                    | -2,16 | 0,58 | 4,84 |
| 240551_at    | 84878  | ZBTB45  | zinc finger and BTB domain containing 45                                   | -2,16 | 0,58 | 4,84 |
| 226554_at    | 51341  | ZBTB7A  | zinc finger and BTB domain containing 7A                                   | -2,16 | 0,67 | 4,84 |
| 23942--_at   | --     | --      | --                                                                         | -2,16 | 0,57 | 4,84 |
| 201325_s_at  | 2012   | EMP1    | epithelial membrane protein 1                                              | -2,16 | 0,64 | 4,84 |
| 156--282_at  | --     | --      | --                                                                         | -2,16 | 0,65 | 4,84 |
| 210544_s_at  | 224    | ALDH3A2 | aldehyde dehydrogenase 3 family, member A2                                 | -2,16 | 0,61 | 4,84 |

|             |        |           |                                                                                                                                       |       |      |      |
|-------------|--------|-----------|---------------------------------------------------------------------------------------------------------------------------------------|-------|------|------|
| 226112_at   | 6443   | SGCB      | sarcoglycan, beta (43kDa dystrophin-associated glycoprotein)                                                                          | -2,16 | 0,69 | 4,84 |
| 235411_at   | 84547  | PGBD1     | piggyBac transposable element derived 1                                                                                               | -2,16 | 0,66 | 4,84 |
| 210287_s_at | 2321   | FLT1      | fms-related tyrosine kinase 1 (vascular endothelial growth factor/vascular permeability factor receptor)                              | -2,16 | 0,63 | 4,84 |
| 229955_at   | 26273  | FBXO3     | F-box protein 3                                                                                                                       | -2,16 | 0,64 | 4,84 |
| 225466_at   | 219988 | FLJ36874  | FLJ36874 protein                                                                                                                      | -2,16 | 0,57 | 4,84 |
| 228487_s_at | 6239   | RREB1     | ras responsive element binding protein 1                                                                                              | -2,16 | 0,64 | 4,84 |
| 230029_x_at | 130507 | ZNF650    | zinc finger protein 650                                                                                                               | -2,16 | 0,71 | 4,84 |
| 220064_at   | 79809  | TTC21B    | tetratricopeptide repeat domain 21B                                                                                                   | -2,16 | 0,58 | 4,84 |
| 238020_at   | 375611 | SLC26A5   | solute carrier family 26, member 5 (prestin)                                                                                          | -2,16 | 0,72 | 4,84 |
| 221568_s_at | 55327  | LIN7C     | lin-7 homolog C (C. elegans)                                                                                                          | -2,16 | 0,63 | 4,84 |
| 225659_at   | 339745 | LOC339745 | hypothetical protein LOC339745                                                                                                        | -2,16 | 0,65 | 4,84 |
| 229039_at   | 6854   | SYN2      | synapsin II                                                                                                                           | -2,16 | 0,56 | 4,84 |
| 1557954_at  | 5931   | RBBP7     | retinoblastoma binding protein 7                                                                                                      | -2,16 | 0,68 | 4,84 |
| 219946_x_at | 79784  | MYH14     | myosin, heavy chain 14                                                                                                                | -2,16 | 0,59 | 4,84 |
| 200947_s_at | 2746   | GLUD1     | glutamate dehydrogenase 1                                                                                                             | -2,16 | 0,67 | 4,84 |
| 221023_s_at | 81033  | KCNH6     | potassium voltage-gated channel, subfamily H (eag-related), member 6                                                                  | -2,16 | 0,57 | 4,84 |
| 233012_at   | 3030   | HADHA     | hydroxyacyl-Coenzyme A dehydrogenase/3-ketoacyl-Coenzyme A thiolase/enoyl-Coenzyme A hydratase (trifunctional protein), alpha subunit | -2,16 | 0,54 | 4,84 |
| 239576_at   | 57509  | MTUS1     | mitochondrial tumor suppressor 1                                                                                                      | -2,16 | 0,57 | 4,84 |
| 231928_at   | 54626  | HES2      | hairy and enhancer of split 2 (Drosophila)                                                                                            | -2,16 | 0,60 | 4,84 |
| 238489_at   | 5563   | PRKAA2    | protein kinase, AMP-activated, alpha 2 catalytic subunit                                                                              | -2,16 | 0,65 | 4,84 |
| 229220_x_at | 64434  | NOM1      | nucleolar protein with MIF4G domain 1                                                                                                 | -2,16 | 0,59 | 4,84 |
| 203216_s_at | 4646   | MYO6      | myosin VI                                                                                                                             | -2,16 | 0,74 | 4,84 |
| 224734_at   | 3146   | HMGB1     | high-mobility group box 1                                                                                                             | -2,16 | 0,70 | 4,84 |
| 222863_at   | 65986  | ZBTB10    | zinc finger and BTB domain containing 10                                                                                              | -2,16 | 0,60 | 4,84 |
| 241348_at   | 55279  | ZNF654    | zinc finger protein 654                                                                                                               | -2,16 | 0,70 | 4,84 |
| 222393_s_at | 80218  | NAT13     | N-acetyltransferase 13                                                                                                                | -2,16 | 0,62 | 4,84 |

|              |        |           |                                                                                                   |       |      |      |
|--------------|--------|-----------|---------------------------------------------------------------------------------------------------|-------|------|------|
| 209034_at    | 10957  | PNRC1     | proline-rich nuclear receptor coactivator 1                                                       | -2,16 | 0,68 | 4,84 |
| 212845_at    | 23034  | SAMD4A    | sterile alpha motif domain containing 4A                                                          | -2,15 | 0,59 | 4,84 |
| 241756_at    | 6595   | SMARCA2   | SWI/SNF related, matrix associated, actin dependent regulator of chromatin, subfamily a, member 2 | -2,15 | 0,60 | 4,84 |
| 204733_at    | 5653   | KLK6      | kallikrein-related peptidase 6                                                                    | -2,15 | 0,54 | 4,84 |
| 224319_s_at  | 54471  | SMCR7L    | Smith-Magenis syndrome chromosome region, candidate 7-like                                        | -2,15 | 0,63 | 4,84 |
| 200796_s_at  | 4170   | MCL1      | myeloid cell leukemia sequence 1 (BCL2-related)                                                   | -2,15 | 0,59 | 4,84 |
| 1570347_at   | 6945   | MLX       | MAX-like protein X                                                                                | -2,15 | 0,58 | 4,84 |
| 229812_at    | 84196  | USP48     | ubiquitin specific peptidase 48                                                                   | -2,15 | 0,57 | 4,84 |
| 242329_at    | 401317 | LOC401317 | hypothetical LOC401317                                                                            | -2,15 | 0,58 | 4,84 |
| 223028_s_at  | 51429  | SNX9      | sorting nexin 9                                                                                   | -2,15 | 0,66 | 4,84 |
| 229763_at    | 116113 | FOXP4     | forkhead box P4                                                                                   | -2,15 | 0,57 | 4,84 |
| 243296_at    | 10135  | PBEF1     | pre-B-cell colony enhancing factor 1                                                              | -2,15 | 0,59 | 4,84 |
| 207246_at    | 7544   | ZFY       | zinc finger protein, Y-linked                                                                     | -2,15 | 0,62 | 4,84 |
| 233111_at    | --     | --        | --                                                                                                | -2,15 | 0,61 | 4,84 |
| 228738_at    | --     | --        | --                                                                                                | -2,15 | 0,60 | 4,84 |
| 205351_at    | 2677   | GGCX      | gamma-glutamyl carboxylase                                                                        | -2,15 | 0,73 | 4,84 |
| 2172--5_at   | --     | --        | --                                                                                                | -2,15 | 0,64 | 4,84 |
| 1557501_a_at | 55187  | VPS13D    | vacuolar protein sorting 13 homolog D ( <i>S. cerevisiae</i> )                                    | -2,15 | 0,66 | 4,84 |
| 208617_s_at  | 8073   | PTP4A2    | protein tyrosine phosphatase type IVA, member 2                                                   | -2,15 | 0,68 | 4,84 |
| 221307_at    | 30820  | KCNIP1    | Kv channel interacting protein 1                                                                  | -2,15 | 0,63 | 4,84 |
| 200754_x_at  | 6427   | SFRS2     | splicing factor, arginine/serine-rich 2                                                           | -2,15 | 0,66 | 4,84 |
| 213630_at    | 23148  | NACAD     | NAC alpha domain containing                                                                       | -2,15 | 0,60 | 4,84 |
| 221015_s_at  | 81602  | CDADC1    | cytidine and dCMP deaminase domain containing 1                                                   | -2,15 | 0,68 | 4,84 |
| 1565495_at   | --     | --        | --                                                                                                | -2,15 | 0,58 | 4,84 |
| 241664_x_at  | 4637   | MYL6      | myosin, light chain 6, alkali, smooth muscle and non-muscle                                       | -2,15 | 0,60 | 4,84 |
| 1563469_at   | 84159  | ARID5B    | AT rich interactive domain 5B (MRF1-like)                                                         | -2,15 | 0,55 | 4,84 |

|              |        |          |                                                                                |       |      |      |
|--------------|--------|----------|--------------------------------------------------------------------------------|-------|------|------|
| 210565_at    | 2642   | GCGR     | glucagon receptor                                                              | -2,15 | 0,62 | 4,84 |
| 24---13_at   | --     | --       | --                                                                             | -2,15 | 0,63 | 4,84 |
| 228067_at    | 343990 | C2orf55  | chromosome 2 open reading frame 55                                             | -2,15 | 0,62 | 4,84 |
| 207198_s_at  | 3987   | LIMS1    | LIM and senescent cell antigen-like domains 1                                  | -2,15 | 0,63 | 4,84 |
| 212195_at    | --     | --       | --                                                                             | -2,15 | 0,72 | 4,84 |
| 209286_at    | 10602  | CDC42EP3 | CDC42 effector protein (Rho GTPase binding) 3                                  | -2,15 | 0,65 | 4,84 |
| 208666_s_at  | 6767   | ST13     | suppression of tumorigenicity 13 (colon carcinoma) (Hsp70 interacting protein) | -2,15 | 0,70 | 4,84 |
| 1552649_a_at | 117584 | RFFL     | ring finger and FYVE-like domain containing 1                                  | -2,15 | 0,62 | 4,84 |
| 205984_at    | 1393   | CRHBP    | corticotropin releasing hormone binding protein                                | -2,15 | 0,56 | 4,84 |
| 224572_s_at  | 359948 | IRF2BP2  | interferon regulatory factor 2 binding protein 2                               | -2,14 | 0,59 | 5,40 |
| 225779_at    | 10999  | SLC27A4  | solute carrier family 27 (fatty acid transporter), member 4                    | -2,14 | 0,58 | 5,40 |
| 1559682_at   | 147166 | TRIM16L  | tripartite motif-containing 16-like                                            | -2,14 | 0,65 | 5,40 |
| 219326_s_at  | 10678  | B3GNT2   | UDP-GlcNAc:betaGal beta-1,3-N-acetylglucosaminyltransferase 2                  | -2,14 | 0,54 | 5,40 |
| 227080_at    | 90874  | ZNF697   | zinc finger protein 697                                                        | -2,14 | 0,61 | 5,40 |
| 225752_at    | 123606 | NIPA1    | non imprinted in Prader-Willi/Angelman syndrome 1                              | -2,14 | 0,67 | 5,40 |
| 203925_at    | 2730   | GCLM     | glutamate-cysteine ligase, modifier subunit                                    | -2,14 | 0,52 | 5,40 |
| 244286_at    | 23048  | FNBP1    | formin binding protein 1                                                       | -2,14 | 0,60 | 5,40 |
| 1557424_at   | --     | --       | --                                                                             | -2,14 | 0,68 | 5,40 |
| 1555095_at   | 26238  | C6orf123 | chromosome 6 open reading frame 123                                            | -2,14 | 0,56 | 5,40 |
| 218863_s_at  | 7145   | TNS1     | tensin 1                                                                       | -2,14 | 0,57 | 5,40 |
| 233177_s_at  | 25953  | PNKD     | paroxysmal nonkinesigenic dyskinesia                                           | -2,14 | 0,57 | 5,40 |
| 230774_at    | 145482 | ZADH1    | zinc binding alcohol dehydrogenase, domain containing 1                        | -2,14 | 0,56 | 5,40 |
| 220910_at    | 80144  | FRAS1    | Fraser syndrome 1                                                              | -2,14 | 0,63 | 5,40 |
| 230160_x_at  | 10589  | DRAP1    | DR1-associated protein 1 (negative cofactor 2 alpha)                           | -2,14 | 0,58 | 5,40 |

|             |                    |                         |                                                                               |       |      |      |
|-------------|--------------------|-------------------------|-------------------------------------------------------------------------------|-------|------|------|
| 231878_at   | 9961               | MVP                     | major vault protein                                                           | -2,14 | 0,64 | 5,40 |
| 227079_at   | 1659               | DHX8                    | DEAH (Asp-Glu-Ala-His) box polypeptide 8                                      | -2,14 | 0,69 | 5,40 |
| 213360_s_at | 441253//<br>/9883  | LOC441253///<br>POM121  | nuclear envelope pore membrane LOC441253///POM121 membrane glycoprotein (rat) | -2,14 | 0,61 | 5,40 |
| 218016_s_at | 55718              | POLR3E                  | polymerase (RNA) III (DNA directed) polypeptide E (80kD)                      | -2,14 | 0,63 | 5,40 |
| 209008_x_at | 3856               | KRT8                    | keratin 8                                                                     | -2,14 | 0,59 | 5,40 |
| 201375_s_at | 5516               | PPP2CB                  | protein phosphatase 2 (formerly 2A), catalytic subunit, beta isoform          | -2,14 | 0,72 | 5,40 |
| 24-469_at   | --                 | --                      | --                                                                            | -2,14 | 0,58 | 5,40 |
| 221738_at   | 57148              | KIAA1219                | KIAA1219                                                                      | -2,14 | 0,59 | 5,40 |
| 222916_s_at | 3069               | HDLBP                   | high density lipoprotein binding protein (vigilin)                            | -2,14 | 0,64 | 5,40 |
| 206604_at   | 5017               | OVOL1                   | ovo-like 1(Drosophila)                                                        | -2,14 | 0,60 | 5,40 |
| 1558710_at  | 57717              | PCDHB16                 | protocadherin beta 16                                                         | -2,14 | 0,58 | 5,40 |
| 225300_at   | 90417              | C15orf23                | chromosome 15 open reading frame 23                                           | -2,14 | 0,63 | 5,40 |
| 213052_at   | 5576               | PRKAR2A                 | protein kinase, cAMP-dependent, regulatory, type II, alpha                    | -2,14 | 0,62 | 5,40 |
| 1553263_at  | 124590             | USH1G                   | Usher syndrome 1G (autosomal recessive)                                       | -2,14 | 0,59 | 5,40 |
| 220519_s_at | 3982               | LIM2                    | lens intrinsic membrane protein 2, 19kDa                                      | -2,14 | 0,60 | 5,40 |
| 226134_s_at | 124540             | MSI2                    | musashi homolog 2 (Drosophila)                                                | -2,14 | 0,57 | 5,40 |
| 1563467_at  | --                 | --                      | --                                                                            | -2,14 | 0,67 | 5,40 |
| 226359_at   | 9567               | GTPBP1                  | GTP binding protein 1                                                         | -2,14 | 0,58 | 5,40 |
| 225888_at   | 80018              | C12orf30                | chromosome 12 open reading frame 30                                           | -2,14 | 0,62 | 5,40 |
| 202760_s_at | 11217///<br>445815 | AKAP2///PAL<br>M2-AKAP2 | A kinase (PRKA) anchor protein 2///PALM2-AKAP2 protein                        | -2,14 | 0,58 | 5,40 |
| 227441_s_at | 56899              | ANKS1B                  | ankyrin repeat and sterile alpha motif domain containing 1B                   | -2,14 | 0,57 | 5,40 |
| 15658--7_at | --                 | --                      | --                                                                            | -2,14 | 0,62 | 5,40 |
| 238038_at   | 55012              | PPP2R3C                 | protein phosphatase 2 (formerly 2A), regulatory subunit B'', gamma            | -2,14 | 0,61 | 5,40 |
| 221677_s_at | 29980              | DONSON                  | downstream neighbor of SON                                                    | -2,14 | 0,67 | 5,40 |

|              |        |           |                                                                     |       |      |      |
|--------------|--------|-----------|---------------------------------------------------------------------|-------|------|------|
| 211548_s_at  | 3248   | HPGD      | hydroxyprostaglandin dehydrogenase 15-(NAD)                         | -2,14 | 0,62 | 5,40 |
| 222523_at    | 59343  | SEN2      | SUMO1/sentrin/SMT3 specific peptidase 2                             | -2,14 | 0,68 | 5,40 |
| 224762_at    | 347735 | SERINC2   | serine incorporator 2                                               | -2,14 | 0,60 | 5,40 |
| 226980_at    | 55789  | DEPDC1B   | DEP domain containing 1B                                            | -2,14 | 0,57 | 5,40 |
| 218530_at    | 29109  | FHOD1     | formin homology 2 domain containing 1                               | -2,14 | 0,62 | 5,40 |
| 214101_s_at  | 9520   | NPEPPS    | aminopeptidase puromycin sensitive                                  | -2,14 | 0,67 | 5,40 |
| 226115_at    | 25909  | AHCTF1    | AT hook containing transcription factor 1                           | -2,14 | 0,66 | 5,40 |
| 210738_s_at  | 8671   | SLC4A4    | solute carrier family 4, sodium bicarbonate cotransporter, member 4 | -2,13 | 0,61 | 5,40 |
| 205935_at    | 2294   | FOXF1     | forkhead box F1                                                     | -2,13 | 0,61 | 5,40 |
| 221572_s_at  | 65010  | SLC26A6   | solute carrier family 26, member 6                                  | -2,13 | 0,55 | 5,40 |
| 206244_at    | 1378   | CR1       | complement component (3b/4b) receptor 1 (Knops blood group)         | -2,13 | 0,57 | 5,40 |
| 225531_at    | 91768  | CABLES1   | Cdk5 and Abl enzyme substrate 1                                     | -2,13 | 0,67 | 5,40 |
| 205498_at    | 2690   | GHR       | growth hormone receptor                                             | -2,13 | 0,65 | 5,40 |
| 244790_at    | 4515   | MTCP1     | mature T-cell proliferation 1                                       | -2,13 | 0,61 | 5,40 |
| 230519_at    | 220108 | FAM124A   | family with sequence similarity 124A                                | -2,13 | 0,64 | 5,40 |
| 238169_at    | --     | --        | --                                                                  | -2,13 | 0,58 | 5,40 |
| 1553155_x_at | 245972 | ATP6V0D2  | ATPase, H+ transporting, lysosomal 38kDa, V0 subunit d2             | -2,13 | 0,55 | 5,40 |
| 216003_at    | 374286 | CDRT1     | CMT1A duplicated region transcript 1                                | -2,13 | 0,61 | 5,40 |
| 208774_at    | 1453   | CSNK1D    | casein kinase 1, delta                                              | -2,13 | 0,68 | 5,40 |
| 214175_x_at  | 8572   | PDLIM4    | PDZ and LIM domain 4                                                | -2,13 | 0,57 | 5,40 |
| 223232_s_at  | 57530  | CGN       | cingulin                                                            | -2,13 | 0,58 | 5,40 |
| 229820_at    | 440993 | LOC440993 | hypothetical gene supported by AK128346                             | -2,13 | 0,57 | 5,40 |
| 212323_s_at  | 55187  | VPS13D    | vacuolar protein sorting 13 homolog D ( <i>S. cerevisiae</i> )      | -2,13 | 0,67 | 5,40 |
| 211584_s_at  | 4863   | NPAT      | nuclear protein, ataxia-telangiectasia locus                        | -2,13 | 0,65 | 5,40 |
| 221402_at    | 4992   | OR1F1     | olfactory receptor, family 1, subfamily F, member 1                 | -2,13 | 0,62 | 5,40 |
| 227642_at    | 29842  | TFCP2L1   | transcription factor CP2-like 1                                     | -2,13 | 0,64 | 5,40 |
| 216885_s_at  | 50717  | WDR42A    | WD repeat domain 42A                                                | -2,13 | 0,61 | 5,40 |

|                  |                 |            |                                                                                                        |       |      |      |
|------------------|-----------------|------------|--------------------------------------------------------------------------------------------------------|-------|------|------|
| 205249_at        | 1959            | EGR2       | early growth response 2 (Krox-20 homolog, Drosophila)                                                  | -2,13 | 0,65 | 5,40 |
| 243967_at        | 3899            | AFF3       | AF4/FMR2 family, member 3                                                                              | -2,13 | 0,58 | 5,40 |
| 24--5----_at     | --              | --         | --                                                                                                     | -2,13 | 0,57 | 5,40 |
| 205509_at        | 1360            | CPB1       | carboxypeptidase B1 (tissue)                                                                           | -2,13 | 0,62 | 5,40 |
| 236350_at        | 26225           | ARL5A      | ADP-ribosylation factor-like 5A                                                                        | -2,13 | 0,62 | 5,40 |
| 212206_s_at      | 94239           | H2AFV      | H2A histone family, member V                                                                           | -2,13 | 0,64 | 5,40 |
| 212120_at        | 23433           | RHOQ       | ras homolog gene family, member Q                                                                      | -2,13 | 0,70 | 5,40 |
| 203311_s_at      | 382             | ARF6       | ADP-ribosylation factor 6                                                                              | -2,13 | 0,57 | 5,40 |
| 22918--_at       | --              | --         | --                                                                                                     | -2,13 | 0,57 | 5,40 |
| 1565034_s_at     | 3899///4<br>297 | AFF3///MLL | AF4/FMR2 family, member 3///myeloid/lymphoid or mixed-lineage leukemia (trithorax homolog, Drosophila) | -2,13 | 0,69 | 5,40 |
| 225337_at        | 11057           | ABHD2      | abhydrolase domain containing 2                                                                        | -2,13 | 0,65 | 5,40 |
| 242245_at        | 84144           | SYDE2      | synapse defective 1, Rho GTPase, homolog 2 (C. elegans)                                                | -2,13 | 0,60 | 5,40 |
| 224624_at        | 56262           | LRR8A      | leucine rich repeat containing 8 family, member A                                                      | -2,13 | 0,65 | 5,40 |
| 218309_at        | 55450           | CAMK2N1    | calcium/calmodulin-dependent protein kinase II inhibitor 1                                             | -2,13 | 0,69 | 5,40 |
| 1562329_at       | 64478           | CSMD1      | CUB and Sushi multiple domains 1                                                                       | -2,13 | 0,62 | 5,40 |
| 222778_s_at      | 7468            | WHSC1      | Wolf-Hirschhorn syndrome candidate 1                                                                   | -2,13 | 0,61 | 5,40 |
| 22376--_s_at     | --              | --         | --                                                                                                     | -2,13 | 0,70 | 5,40 |
| 1553834_at       | 256076          | FLJ35880   | hypothetical protein FLJ35880                                                                          | -2,13 | 0,63 | 5,40 |
| 239291_at        | --              | --         | --                                                                                                     | -2,13 | 0,60 | 5,40 |
| 221245_s_at      | --              | --         | --                                                                                                     | -2,13 | 0,58 | 5,40 |
| 214349_at        | --              | --         | --                                                                                                     | -2,13 | 0,58 | 5,40 |
| 228395_at        | 55830           | GLT8D1     | glycosyltransferase 8 domain containing 1                                                              | -2,13 | 0,63 | 5,40 |
| 203143_s_at      | 9674            | KIAA0040   | KIAA0040                                                                                               | -2,13 | 0,63 | 5,40 |
| 228097_at        | 29116           | MYLIP      | myosin regulatory light chain interacting protein                                                      | -2,13 | 0,61 | 5,40 |
| 1553430_a_a<br>t | 128178          | EDARADD    | EDAR-associated death domain                                                                           | -2,13 | 0,63 | 5,40 |
| 220795_s_at      | 57596           | KIAA1446   | likely ortholog of rat brain-enriched guanylate kinase-associated protein                              | -2,13 | 0,61 | 5,40 |



|              |        |          |                                                                                        |       |      |      |
|--------------|--------|----------|----------------------------------------------------------------------------------------|-------|------|------|
| 1563629_a_at | --     | --       | --                                                                                     | -2,12 | 0,66 | 5,40 |
| 212966_at    | 23119  | HIC2     | hypermethylated in cancer 2                                                            | -2,12 | 0,56 | 5,40 |
| 223595_at    | 83935  | TMEM133  | transmembrane protein 133                                                              | -2,12 | 0,63 | 5,40 |
| 1554747_a_at | 4735   | 37500    | septin 2                                                                               | -2,12 | 0,58 | 5,40 |
| 203702_s_at  | 9654   | TTLL4    | tubulin tyrosine ligase-like family, member 4                                          | -2,12 | 0,64 | 5,40 |
| 213279_at    | 115817 | DHRS1    | dehydrogenase/reductase (SDR family) member 1                                          | -2,12 | 0,54 | 5,40 |
| 1556764_s_at | 5144   | PDE4D    | phosphodiesterase 4D, cAMP-specific (phosphodiesterase E3 dunce homolog, Drosophila)   | -2,12 | 0,58 | 5,40 |
| 225142_at    | 80853  | JHDM1D   | jumonji C domain-containing histone demethylase 1 homolog D (S. cerevisiae)            | -2,12 | 0,58 | 5,40 |
| 201711_x_at  | 5903   | RANBP2   | RAN binding protein 2                                                                  | -2,12 | 0,64 | 5,40 |
| 203855_at    | 22911  | WDR47    | WD repeat domain 47                                                                    | -2,12 | 0,66 | 5,40 |
| 233898_s_at  | 26127  | FGFR1OP2 | FGFR1 oncogene partner 2                                                               | -2,12 | 0,69 | 5,40 |
| 22947--_at   | --     | --       | --                                                                                     | -2,12 | 0,63 | 5,40 |
| 205823_at    | 6002   | RGS12    | regulator of G-protein signalling 12                                                   | -2,12 | 0,63 | 5,40 |
| 215964_at    | 54212  | SNTG1    | syntrophin, gamma 1                                                                    | -2,12 | 0,63 | 5,40 |
| 210162_s_at  | 4772   | NFATC1   | nuclear factor of activated T-cells, cytoplasmic, calcineurin-dependent 1              | -2,12 | 0,70 | 5,40 |
| 203120_at    | 7159   | TP53BP2  | tumor protein p53 binding protein, 2                                                   | -2,12 | 0,66 | 5,40 |
| 225582_at    | 85450  | KIAA1754 | KIAA1754                                                                               | -2,12 | 0,57 | 5,40 |
| 235454_at    | --     | --       | --                                                                                     | -2,12 | 0,62 | 5,40 |
| 212059_s_at  | 26133  | TRPC4AP  | transient receptor potential cation channel, subfamily C, member 4 associated protein  | -2,12 | 0,62 | 5,40 |
| 222471_s_at  | 56888  | KCMF1    | potassium channel modulatory factor 1                                                  | -2,12 | 0,69 | 5,40 |
| 244326_at    | 55295  | KLHL26   | kelch-like 26 (Drosophila)                                                             | -2,12 | 0,58 | 5,40 |
| 208854_s_at  | 8428   | STK24    | serine/threonine kinase 24 (STE20 homolog, yeast)                                      | -2,12 | 0,69 | 5,40 |
| 230426_at    | 1738   | DLD      | dihydrolipoamide dehydrogenase                                                         | -2,12 | 0,70 | 5,40 |
| 206770_s_at  | 23443  | SLC35A3  | solute carrier family 35 (UDP-N-acetylglucosamine (UDP-GlcNAc) transporter), member A3 | -2,12 | 0,71 | 5,40 |

|                  |        |           |                                                                                               |       |      |      |
|------------------|--------|-----------|-----------------------------------------------------------------------------------------------|-------|------|------|
| 229737_at        | 55603  | FAM46A    | family with sequence similarity 46, member A                                                  | -2,12 | 0,55 | 5,40 |
| 243172_at        | --     | --        | --                                                                                            | -2,12 | 0,58 | 5,40 |
| 207293_s_at      | 186    | AGTR2     | angiotensin II receptor, type 2                                                               | -2,12 | 0,61 | 5,40 |
| 1564949_at       | --     | --        | --                                                                                            | -2,12 | 0,65 | 5,40 |
| 242871_at        | 54852  | PAQR5     | progesterone and adipoQ receptor family member V                                              | -2,12 | 0,66 | 5,40 |
| 212642_s_at      | 3097   | HIVEP2    | human immunodeficiency virus type I enhancer binding protein 2                                | -2,12 | 0,60 | 5,40 |
| 237864_at        | 57403  | RAB22A    | RAB22A, member RAS oncogene family                                                            | -2,12 | 0,61 | 5,40 |
| 218498_s_at      | 30001  | ERO1L     | ERO1-like ( <i>S. cerevisiae</i> )                                                            | -2,12 | 0,65 | 5,40 |
| 232---7_at       | --     | --        | --                                                                                            | -2,12 | 0,66 | 5,40 |
| 203198_at        | 1025   | CDK9      | cyclin-dependent kinase 9 (CDC2-related kinase)                                               | -2,12 | 0,57 | 5,40 |
| 203426_s_at      | 3488   | IGFBP5    | insulin-like growth factor binding protein 5                                                  | -2,11 | 0,62 | 5,40 |
| 210074_at        | 1515   | CTSL2     | cathepsin L2                                                                                  | -2,11 | 0,55 | 5,40 |
| 229147_at        | 166824 | RASSF6    | Ras association (RalGDS/AF-6) domain family 6                                                 | -2,11 | 0,63 | 5,40 |
| 207323_s_at      | 4155   | MBP       | myelin basic protein                                                                          | -2,11 | 0,69 | 5,40 |
| 238782_at        | --     | --        | --                                                                                            | -2,11 | 0,69 | 5,40 |
| 1556496_a_a<br>t | --     | --        | --                                                                                            | -2,11 | 0,56 | 5,40 |
| 225429_at        | 5537   | PPP6C     | protein phosphatase 6, catalytic subunit                                                      | -2,11 | 0,66 | 5,40 |
| 226646_at        | 10365  | KLF2      | Kruppel-like factor 2 (lung)                                                                  | -2,11 | 0,59 | 5,40 |
| 221844_x_at      | --     | --        | --                                                                                            | -2,11 | 0,73 | 5,40 |
| 215997_s_at      | 8450   | CUL4B     | cullin 4B                                                                                     | -2,11 | 0,67 | 5,40 |
| 213128_s_at      | 7337   | UBE3A     | ubiquitin protein ligase E3A (human papilloma virus E6-associated protein, Angelman syndrome) | -2,11 | 0,68 | 5,40 |
| 223310_x_at      | 50640  | PNPLA8    | patatin-like phospholipase domain containing 8                                                | -2,11 | 0,66 | 5,40 |
| 1561289_at       | 286370 | LOC286370 | hypothetical protein LOC286370                                                                | -2,11 | 0,61 | 5,40 |
| 216328_at        | 27181  | SIGLEC8   | sialic acid binding Ig-like lectin 8                                                          | -2,11 | 0,59 | 5,40 |
| 238481_at        | 4256   | MGP       | matrix Gla protein                                                                            | -2,11 | 0,62 | 5,40 |
| 222350_at        | 607    | BCL9      | B-cell CLL/lymphoma 9                                                                         | -2,11 | 0,56 | 5,40 |

|              |        |             |                                                                                         |       |      |      |
|--------------|--------|-------------|-----------------------------------------------------------------------------------------|-------|------|------|
| 220598_at    | 79092  | CARD14      | caspase recruitment domain family, member 14                                            | -2,11 | 0,58 | 5,40 |
| 201368_at    | 678    | ZFP36L2     | zinc finger protein 36, C3H type-like 2                                                 | -2,11 | 0,70 | 5,40 |
| 212149_at    | 23167  | KIAA0143    | KIAA0143 protein                                                                        | -2,11 | 0,72 | 5,40 |
| 230573_at    | 10110  | SGK2        | serum/glucocorticoid regulated kinase 2                                                 | -2,11 | 0,66 | 5,40 |
| 238568_s_at  | 4864   | NPC1        | Niemann-Pick disease, type C1                                                           | -2,11 | 0,62 | 5,40 |
| 1569761_x_at | 390846 | hCG_1642947 | hCG1642947                                                                              | -2,11 | 0,60 | 5,40 |
| 201299_s_at  | 55233  | MOBK1B      | MOB1, Mps One Binder kinase activator-like 1B (yeast)                                   | -2,11 | 0,62 | 5,40 |
| 222480_at    | 55585  | UBE2Q1      | ubiquitin-conjugating enzyme E2Q (putative) 1                                           | -2,11 | 0,68 | 5,40 |
| 225946_at    | 11228  | RASSF8      | Ras association (RalGDS/AF-6) domain family 8                                           | -2,11 | 0,66 | 5,40 |
| 238869_at    | 3091   | HIF1A       | hypoxia-inducible factor 1, alpha subunit (basic helix-loop-helix transcription factor) | -2,11 | 0,61 | 5,40 |
| 227033_at    | 2923   | PDIA3       | protein disulfide isomerase family A, member 3                                          | -2,11 | 0,69 | 5,40 |
| 1554655_a_at | 388394 | RPRML       | reprimo-like                                                                            | -2,11 | 0,62 | 5,40 |
| 204980_at    | 9575   | CLOCK       | clock homolog (mouse)                                                                   | -2,11 | 0,59 | 5,40 |
| 225033_at    | 286167 | LOC286167   | hypothetical protein LOC286167                                                          | -2,11 | 0,52 | 5,40 |
| 39249_at     | 360    | AQP3        | aquaporin 3 (Gill blood group)                                                          | -2,11 | 0,59 | 5,40 |
| 1554296_at   | 1588   | CYP19A1     | cytochrome P450, family 19, subfamily A, polypeptide 1                                  | -2,11 | 0,59 | 5,40 |
| 214216_s_at  | 23185  | LARP5       | La ribonucleoprotein domain family, member 5                                            | -2,11 | 0,61 | 5,40 |
| 237204_at    | 1801   | DPH1        | DPH1 homolog ( <i>S. cerevisiae</i> )                                                   | -2,11 | 0,63 | 5,40 |
| 227577_at    | 149371 | EXOC8       | exocyst complex component 8                                                             | -2,11 | 0,66 | 5,40 |
| 238633_at    | 80314  | EPC1        | enhancer of polycomb homolog 1 ( <i>Drosophila</i> )                                    | -2,11 | 0,59 | 5,40 |
| 242868_at    | 2034   | EPAS1       | endothelial PAS domain protein 1                                                        | -2,11 | 0,62 | 5,40 |
| 228363_at    | 331    | BIRC4       | baculoviral IAP repeat-containing 4                                                     | -2,11 | 0,74 | 5,40 |
| 201691_s_at  | 7163   | TPD52       | tumor protein D52                                                                       | -2,11 | 0,63 | 5,40 |
| 202070_s_at  | 3419   | IDH3A       | isocitrate dehydrogenase 3 (NAD+) alpha                                                 | -2,11 | 0,63 | 5,40 |
| 228373_at    | 29035  | C16orf72    | chromosome 16 open reading frame 72                                                     | -2,11 | 0,71 | 5,40 |

|                  |        |           |                                                               |       |      |      |
|------------------|--------|-----------|---------------------------------------------------------------|-------|------|------|
| 221543_s_at      | 11160  | ERLIN2    | ER lipid raft associated 2                                    | -2,11 | 0,69 | 5,40 |
| 218935_at        | 30845  | EHD3      | EH-domain containing 3                                        | -2,11 | 0,64 | 5,40 |
| 226354_at        | 114294 | LACTB     | lactamase, beta                                               | -2,11 | 0,66 | 5,40 |
| 207053_at        | 6546   | SLC8A1    | solute carrier family 8 (sodium/calcium exchanger), member 1  | -2,11 | 0,57 | 5,40 |
| 215438_x_at      | 2935   | GSPT1     | G1 to S phase transition 1                                    | -2,11 | 0,67 | 5,40 |
| 218137_s_at      | 60682  | SMAP1     | stromal membrane-associated protein 1                         | -2,11 | 0,71 | 5,40 |
| 231676_s_at      | 957    | ENTPD5    | ectonucleoside triphosphate diphosphohydrolase 5              | -2,11 | 0,61 | 5,40 |
| 209352_s_at      | 23309  | SIN3B     | SIN3 homolog B, transcription regulator (yeast)               | -2,11 | 0,61 | 5,40 |
| 228203_at        | 11041  | B3GNT1    | UDP-GlcNAc:betaGal beta-1,3-N-acetylglucosaminyltransferase 1 | -2,10 | 0,67 | 5,40 |
| 235958_at        | 255189 | PLA2G4F   | phospholipase A2, group IVF                                   | -2,10 | 0,60 | 5,40 |
| 226208_at        | 57688  | ZSWIM6    | zinc finger, SWIM-type containing 6                           | -2,10 | 0,63 | 5,40 |
| 239802_at        | 56755  | LOC56755  | hypothetical protein LOC56755                                 | -2,10 | 0,60 | 5,40 |
| 15617--6_at      | --     | --        | --                                                            | -2,10 | 0,63 | 5,40 |
| 205294_at        | 10458  | BAIAP2    | BAI1-associated protein 2                                     | -2,10 | 0,61 | 5,40 |
| 234153_at        | 8871   | SYNJ2     | synaptojanin 2                                                | -2,10 | 0,59 | 5,40 |
| 233019_at        | 29883  | CNOT7     | CCR4-NOT transcription complex, subunit 7                     | -2,10 | 0,60 | 5,40 |
| 205191_at        | 6102   | RP2       | retinitis pigmentosa 2 (X-linked recessive)                   | -2,10 | 0,59 | 5,40 |
| 219708_at        | 56953  | NT5M      | 5',3'-nucleotidase, mitochondrial                             | -2,10 | 0,62 | 5,40 |
| 201037_at        | 5214   | PFKP      | phosphofructokinase, platelet                                 | -2,10 | 0,66 | 5,40 |
| 201235_s_at      | 7832   | BTG2      | BTG family, member 2                                          | -2,10 | 0,67 | 5,40 |
| 200690_at        | 3313   | HSPA9     | heat shock 70kDa protein 9 (mortalin)                         | -2,10 | 0,65 | 5,40 |
| 214043_at        | 5789   | PTPRD     | protein tyrosine phosphatase, receptor type, D                | -2,10 | 0,63 | 5,40 |
| 203233_at        | 3566   | IL4R      | interleukin 4 receptor                                        | -2,10 | 0,64 | 5,40 |
| 210020_x_at      | 810    | CALML3    | calmodulin-like 3                                             | -2,10 | 0,48 | 5,40 |
| 204135_at        | 11259  | FILIP1L   | filamin A interacting protein 1-like                          | -2,10 | 0,64 | 5,40 |
| 214629_x_at      | 57142  | RTN4      | reticulon 4                                                   | -2,10 | 0,74 | 5,40 |
| 204094_s_at      | 9819   | TSC22D2   | TSC22 domain family, member 2                                 | -2,10 | 0,65 | 5,40 |
| 1555847_a_a<br>t | 284454 | LOC284454 | hypothetical protein LOC284454                                | -2,10 | 0,61 | 5,40 |

|             |        |         |                                                                                                         |       |      |      |
|-------------|--------|---------|---------------------------------------------------------------------------------------------------------|-------|------|------|
| 201455_s_at | 9520   | NPEPPS  | aminopeptidase puromycin sensitive                                                                      | -2,10 | 0,68 | 5,40 |
| 218711_s_at | 8436   | SDPR    | serum deprivation response (phosphatidylserine binding protein)                                         | -2,10 | 0,48 | 5,40 |
| 209347_s_at | 4094   | MAF     | v-maf musculoaponeurotic fibrosarcoma oncogene homolog (avian)                                          | -2,10 | 0,62 | 5,40 |
| 242280_x_at | 80315  | CPEB4   | cytoplasmic polyadenylation element binding protein 4                                                   | -2,10 | 0,57 | 5,40 |
| 210472_at   | 4495   | MT1G    | metallothionein 1G                                                                                      | -2,10 | 0,62 | 5,40 |
| 234566_at   | 84102  | SLC41A2 | solute carrier family 41, member 2                                                                      | -2,10 | 0,65 | 5,40 |
| 226987_at   | 29890  | RBM15B  | RNA binding motif protein 15B                                                                           | -2,10 | 0,70 | 5,40 |
| 205117_at   | 2246   | FGF1    | fibroblast growth factor 1 (acidic)                                                                     | -2,10 | 0,50 | 5,40 |
| 1553517_at  | 222894 | FERD3L  | Fer3-like (Drosophila)                                                                                  | -2,10 | 0,61 | 5,40 |
| 212051_at   | 147179 | WIPF2   | WAS/WASL interacting protein family, member 2                                                           | -2,10 | 0,66 | 5,40 |
| 201013_s_at | 10606  | PAICS   | phosphoribosylaminoimidazole carboxylase,<br>phosphoribosylaminoimidazole succinocarboxamide synthetase | -2,10 | 0,72 | 5,40 |
| 230755_at   | 162494 | RHBDL3  | rhomboid, veinlet-like 3 (Drosophila)                                                                   | -2,10 | 0,61 | 5,40 |
| 236889_at   | 79720  | VPS37B  | vacuolar protein sorting 37 homolog B ( <i>S. cerevisiae</i> )                                          | -2,10 | 0,62 | 5,40 |
| 226547_at   | 7994   | MYST3   | MYST histone acetyltransferase (monocytic leukemia) 3                                                   | -2,10 | 0,66 | 5,40 |
| 24--136_at  | --     | --      | --                                                                                                      | -2,10 | 0,58 | 5,40 |
| 212828_at   | 8871   | SYNJ2   | synaptojanin 2                                                                                          | -2,10 | 0,61 | 5,40 |
| 206581_at   | 646    | BNC1    | basonuclin 1                                                                                            | -2,10 | 0,63 | 5,40 |
| 217018_at   | 57107  | PDSS2   | prenyl (decaprenyl) diphosphate synthase, subunit 2                                                     | -2,10 | 0,53 | 5,40 |
| 220740_s_at | 9990   | SLC12A6 | solute carrier family 12 (potassium/chloride transporters), member 6                                    | -2,10 | 0,57 | 5,40 |
| 219470_x_at | 54619  | CCNJ    | cyclin J                                                                                                | -2,10 | 0,68 | 5,40 |
| 219461_at   | 56924  | PAK6    | p21(CDKN1A)-activated kinase 6                                                                          | -2,10 | 0,57 | 5,40 |
| 215150_at   | 55432  | YOD1    | YOD1 OTU deubiquinating enzyme 1 homolog ( <i>S. cerevisiae</i> )                                       | -2,10 | 0,55 | 5,40 |
| 203007_x_at | 10434  | LYPLA1  | lysophospholipase I                                                                                     | -2,10 | 0,60 | 5,40 |

|             |        |          |                                                                             |       |      |      |
|-------------|--------|----------|-----------------------------------------------------------------------------|-------|------|------|
| 205284_at   | 9816   | KIAA0133 | KIAA0133                                                                    | -2,10 | 0,61 | 5,40 |
| 242686_at   | 90627  | STARD13  | START domain containing 13                                                  | -2,10 | 0,58 | 5,40 |
| 23--689_at  | --     | --       | --                                                                          | -2,10 | 0,64 | 5,40 |
| 229879_at   | 444    | ASPH     | aspartate beta-hydroxylase                                                  | -2,10 | 0,62 | 5,40 |
| 214661_s_at | 8602   | NOL14    | nucleolar protein 14                                                        | -2,10 | 0,67 | 5,40 |
| 204836_at   | 2731   | GLDC     | glycine dehydrogenase (decarboxylating)                                     | -2,10 | 0,59 | 5,40 |
| 225831_at   | 7798   | LUZP1    | leucine zipper protein 1                                                    | -2,09 | 0,65 | 5,40 |
| 212748_at   | 57591  | MKL1     | megakaryoblastic leukemia (translocation) 1                                 | -2,09 | 0,64 | 5,40 |
| 240337_at   | 387    | RHOA     | ras homolog gene family, member A                                           | -2,09 | 0,56 | 5,40 |
| 206034_at   | 5271   | SERPINB8 | serpin peptidase inhibitor, clade B (ovalbumin), member 8                   | -2,09 | 0,63 | 5,40 |
| 213771_at   | 26145  | IRF2BP1  | interferon regulatory factor 2 binding protein 1                            | -2,09 | 0,61 | 5,40 |
| 227996_at   | 10160  | FARP1    | FERM, RhoGEF (ARHGEF) and pleckstrin domain protein 1 (chondrocyte-derived) | -2,09 | 0,69 | 5,40 |
| 212576_at   | 23295  | MGRN1    | mahogunin, ring finger 1                                                    | -2,09 | 0,60 | 5,40 |
| 223465_at   | 10087  | COL4A3BP | collagen, type IV, alpha 3 (Goodpasture antigen) binding protein            | -2,09 | 0,67 | 5,40 |
| 213034_at   | 23387  | KIAA0999 | KIAA0999 protein                                                            | -2,09 | 0,65 | 5,40 |
| 203885_at   | 23011  | RAB21    | RAB21, member RAS oncogene family                                           | -2,09 | 0,70 | 5,40 |
| 227618_at   | 392490 | FLJ44635 | TPT1-like protein                                                           | -2,09 | 0,64 | 5,40 |
| 232978_at   | 10150  | MBNL2    | muscleblind-like 2 (Drosophila)                                             | -2,09 | 0,61 | 5,40 |
| 212223_at   | 3423   | IDS      | iduronate 2-sulfatase (Hunter syndrome)                                     | -2,09 | 0,63 | 5,40 |
| 212715_s_at | 57553  | MICAL3   | microtubule associated monooxygenase, calponin and LIM domain containing 3  | -2,09 | 0,65 | 5,40 |
| 209623_at   | 64087  | MCCC2    | methylcrotonoyl-Coenzyme A carboxylase 2 (beta)                             | -2,09 | 0,61 | 5,40 |
| 212564_at   | 23510  | KCTD2    | potassium channel tetramerisation domain containing 2                       | -2,09 | 0,65 | 5,40 |
| 223194_s_at | 63027  | C6orf85  | chromosome 6 open reading frame 85                                          | -2,09 | 0,59 | 5,40 |
| 234982_at   | 130507 | ZNF650   | zinc finger protein 650                                                     | -2,09 | 0,60 | 5,40 |
| 234975_at   | 2935   | GSPT1    | G1 to S phase transition 1                                                  | -2,09 | 0,64 | 5,40 |
| 241962_at   | --     | --       | --                                                                          | -2,09 | 0,62 | 5,40 |
| 242155_x_at | 117584 | RFFL     | ring finger and FYVE-like domain containing 1                               | -2,09 | 0,59 | 5,40 |

|              |        |           |                                                                    |       |      |      |
|--------------|--------|-----------|--------------------------------------------------------------------|-------|------|------|
| 242366_at    | --     | --        | --                                                                 | -2,09 | 0,58 | 5,40 |
| 210968_s_at  | 57142  | RTN4      | reticulon 4                                                        | -2,09 | 0,70 | 5,40 |
| 219101_x_at  | 79575  | ABHD8     | abhydrolase domain containing 8                                    | -2,09 | 0,61 | 5,40 |
| 223534_s_at  | 83694  | RPS6KL1   | ribosomal protein S6 kinase-like 1                                 | -2,09 | 0,60 | 5,40 |
| 243477_at    | 83734  | ATG10     | ATG10 autophagy related 10 homolog ( <i>S. cerevisiae</i> )        | -2,09 | 0,62 | 5,40 |
| 1555215_a_at | 11255  | HRH3      | histamine receptor H3                                              | -2,09 | 0,68 | 5,40 |
| 211296_x_at  | 7316   | UBC       | ubiquitin C                                                        | -2,09 | 0,73 | 5,40 |
| 227312_at    | --     | --        | --                                                                 | -2,09 | 0,69 | 5,40 |
| 2--9176_at   | --     | --        | --                                                                 | -2,09 | 0,66 | 5,40 |
| 231590_at    | 2628   | GATM      | glycine amidinotransferase (L-arginine:glycine amidinotransferase) | -2,09 | 0,72 | 5,40 |
| 229085_at    | 116135 | LRRC3B    | leucine rich repeat containing 3B                                  | -2,09 | 0,63 | 5,40 |
| 2312--8_at   | --     | --        | --                                                                 | -2,09 | 0,52 | 5,40 |
| 237333_at    | 81493  | SYNC1     | syncoilin, intermediate filament 1                                 | -2,09 | 0,57 | 5,40 |
| 232950_s_at  | 57605  | PITPNM2   | phosphatidylinositol transfer protein, membrane-associated 2       | -2,09 | 0,59 | 5,40 |
| 1558371_a_at | --     | --        | --                                                                 | -2,09 | 0,60 | 5,40 |
| 225867_at    | 114990 | VASN      | vasorin                                                            | -2,09 | 0,62 | 5,40 |
| 210517_s_at  | 9590   | AKAP12    | A kinase (PRKA) anchor protein (gravin) 12                         | -2,09 | 0,61 | 5,40 |
| 235159_at    | 55281  | TMEM140   | transmembrane protein 140                                          | -2,09 | 0,63 | 5,40 |
| 226133_s_at  | 83874  | TBC1D10A  | TBC1 domain family, member 10A                                     | -2,09 | 0,56 | 5,40 |
| 212381_at    | 23358  | USP24     | ubiquitin specific peptidase 24                                    | -2,09 | 0,62 | 5,40 |
| 242288_s_at  | 84034  | EMILIN2   | elastin microfibril interfacer 2                                   | -2,09 | 0,63 | 5,40 |
| 242141_at    | 3066   | HDAC2     | histone deacetylase 2                                              | -2,09 | 0,67 | 5,40 |
| 238057_at    | 85015  | USP45     | ubiquitin specific peptidase 45                                    | -2,09 | 0,66 | 5,40 |
| 215085_x_at  | 9940   | DLEC1     | deleted in lung and esophageal cancer 1                            | -2,09 | 0,66 | 5,40 |
| 222362_at    | --     | --        | --                                                                 | -2,09 | 0,62 | 5,40 |
| 239672_at    | 399959 | LOC399959 | hypothetical gene supported by BX647608                            | -2,09 | 0,52 | 5,40 |
| 1559433_at   | --     | --        | --                                                                 | -2,09 | 0,65 | 5,40 |
| 201651_s_at  | 11252  | PACSIN2   | protein kinase C and casein kinase substrate in neurons 2          | -2,09 | 0,66 | 5,40 |

|           |      |       |                                   |       |      |      |
|-----------|------|-------|-----------------------------------|-------|------|------|
| 235872_at | 7014 | TERF2 | telomeric repeat binding factor 2 | -2,09 | 0,66 | 5,40 |
| 238839_at | 5013 | OTX1  | orthodenticle homeobox 1          | -2,08 | 0,61 | 5,40 |
