# Supplementary material
Source: PubMed Central journal article supplement (PMC2723986)
Supplement: ASN.2008111145_9.pdf [file ASN.2008111145_9.pdf]

**Supplemental Table 4**

**Clinical information on implantation biopsies used for immunohistochemistry with results of immunohistochemical staining for different renal compartments**

| Living vs. Deceased donor | Biopsy ID  | Biopsy number | Patient initials | Donor sex | Donor age | Donor reason of death           | Cold ischemia time (hours) | Delayed graft function | C3d glom cappillaries | C3d mesangial | C3d tubular epithelium | C3d tubular basal membrane | C3d peritubular cappillaries | C4d glom cappillaries | C4d mesangial | C4d tubular epithelium | C4d tubular basal membrane | C4d peritubular cappillaries |
|---------------------------|------------|---------------|------------------|-----------|-----------|---------------------------------|----------------------------|------------------------|-----------------------|---------------|------------------------|----------------------------|------------------------------|-----------------------|---------------|------------------------|----------------------------|------------------------------|
| Deceased                  | Biopsy-DD1 | K-17902       | MH               | female    | 53,1      | ischemic stroke                 | 15,7                       | 1                      | 0                     | 0             | 1 apical               | 1                          | 0                            | 0                     | 1             | 0                      | 1 focal                    | 0                            |
|                           | Biopsy-DD3 | K-19135       | FR               | male      | 35,7      | ischemic stroke                 | 17,0                       | 0                      | 0                     | 1             | 1 apical               | 3                          | 0                            | 0                     | 1             | 0                      | 0                          | 0                            |
|                           | Biopsy-DD5 | K-16733       | RG               | male      | 51,3      | craniocerebral trauma (gunshot) | 19,8                       | 0                      | 0                     | 1             | 0                      | 3                          | 0                            | 0                     | 1             | 2                      | 0                          | 0                            |
|                           | Biopsy-DD2 | N-11359       | JM               | female    | 51,4      | subarachnoid hemorrhage         | 16,9                       | 0                      | 0                     | 1 focal       | 0                      | 2                          | 0                            | 0                     | 2             | 1                      | 0                          | 0                            |
|                           | Biopsy-DD4 | K-16768       | DW               | female    | 37,5      | subarachnoid hemorrhage         | 17,1                       | 1                      | 0                     | 3             | 1 apical               | 2                          | 0                            | 0                     | 2             | 2                      | 0                          | 0                            |
|                           | Biopsy-DD6 | K-16738       | FG               | female    | 45,5      | craniocerebral trauma           | 24,4                       | 0                      | 0                     | 2             | 0                      | 3                          | 0                            | 0                     | 2             | 0                      | 3 focal                    | 0                            |
| Living                    | Biopsy-LD1 | K-19702       | JD               | female    | 63,7      | --                              | 0,3                        | 0                      | 0                     | 3             | 0                      | 3                          | 0                            | 0                     | 3             | 0                      | 1 focal                    | 0                            |
|                           | Biopsy-LD2 | N-12886       | AD               | female    | 46,3      | --                              | 0,3                        | 0                      | 0                     | 1             | 0                      | 2                          | 0                            | 0                     | 1             | 0                      | 1 focal                    | 0                            |
|                           | Biopsy-LD3 | K-20595       | JR               | female    | 47,9      | --                              | 0,5                        | 0                      | 0                     | 2             | 1 apical               | 3                          | 0                            | 0                     | 3             | 0                      | 3 focal                    | 0                            |
|                           | Biopsy-LD4 | K-20185       | MS               | male      | 42,4      | --                              | 0,5                        | 0                      | NA                    | NA            | 1 apical               | 0                          | 0                            | NA                    | NA            | 0                      | 0                          | 0                            |

NA = not available (no glomeruli in the sections)
