# Supplementary material
Source: PubMed Central journal article supplement (PMC2723986)
Supplement: ASN.2008111145_10.pdf [file ASN.2008111145_10.pdf]

## Supplemental Table 5

### Quantitative Significance Analysis of Microarrays comparing gene expression with donor age in implantation biopsies (N=18)

| Probe Set ID                                                        | UniGene ID | Gene symbol                                                       | Score | q-value (%) | Probe sets overlapping with DD/LD SAM analysis |
|---------------------------------------------------------------------|------------|-------------------------------------------------------------------|-------|-------------|------------------------------------------------|
| <b>Probe sets lower expressed with increasing donor age (N=270)</b> |            |                                                                   |       |             |                                                |
| 241772_at                                                           | hs.677577  | PCDH11Y                                                           | -3,53 | 0,00        | no                                             |
| 213120_at                                                           | hs.620701  | KIAA0701                                                          | -3,35 | 0,00        | no                                             |
| 231795_at                                                           | Hs.44385   | STON1                                                             | -3,16 | 0,00        | no                                             |
| 1565716_at                                                          | hs.513522  | FUS                                                               | -3,09 | 0,00        | no                                             |
| 242441_at                                                           | hs.622537  | ---                                                               | -3,03 | 0,00        | no                                             |
| 216607_s_at                                                         | hs.417077  | CYP51A1                                                           | -3,00 | 0,00        | no                                             |
| 1553066_at                                                          | hs.434116  | TAAR9                                                             | -2,99 | 0,00        | no                                             |
| 203526_s_at                                                         | hs.158932  | APC                                                               | -2,96 | 0,00        | no                                             |
| 1569947_at                                                          | hs.684449  | PARK2                                                             | -2,96 | 0,00        | no                                             |
| 1553579_a_at                                                        | hs.2717    | SPAG11                                                            | -2,95 | 0,00        | no                                             |
| 236714_at                                                           | hs.56400   | Transcribed locus, moderately similar to XP_509710.1<br>PREDICTED | -2,95 | 0,00        | no                                             |
| 1561260_at                                                          | hs.375797  | CDNA clone IMAGE                                                  | -2,90 | 0,00        | no                                             |
| 210339_s_at                                                         | hs.515560  | KLK2                                                              | -2,88 | 0,00        | no                                             |
| 241104_at                                                           | Hs.655143  | SORBS2                                                            | -2,86 | 0,00        | no                                             |
| 209921_at                                                           | hs.390594  | SLC7A11                                                           | -2,86 | 0,00        | no                                             |
| 209157_at                                                           | hs.368078  | DNAJA2                                                            | -2,86 | 0,00        | yes                                            |
| 232461_at                                                           | hs.386684  | AHI1                                                              | -2,83 | 0,00        | no                                             |
| 1567253_at                                                          | hs.538726  | OR10D3P                                                           | -2,82 | 0,00        | no                                             |
| 228936_at                                                           | hs.217079  | Transcribed locus                                                 | -2,81 | 0,00        | no                                             |
| 238340_at                                                           | hs.632447  | WDR42A                                                            | -2,81 | 0,00        | no                                             |
| 216091_s_at                                                         | hs.643802  | BTRC                                                              | -2,80 | 0,00        | no                                             |
| 233676_at                                                           | hs.661083  | GPC6                                                              | -2,79 | 0,00        | no                                             |
| 234680_at                                                           | hs.307009  | KRTAP17-1                                                         | -2,78 | 0,00        | no                                             |
| 233349_at                                                           | hs.445078  | TLK2                                                              | -2,78 | 0,00        | no                                             |
| 215755_at                                                           | ---        | LOC51149                                                          | -2,77 | 0,00        | no                                             |
| 239314_at                                                           | hs.507783  | RP11-50D16.3                                                      | -2,76 | 1,67        | no                                             |
| 1566037_at                                                          | Hs.657950  | DGCR7                                                             | -2,76 | 1,67        | no                                             |
| 235722_at                                                           | hs.443661  | SYNJ2BP                                                           | -2,74 | 1,67        | no                                             |
| 239687_at                                                           | hs.143681  | BTBD12                                                            | -2,74 | 1,67        | no                                             |
| 1569240_at                                                          | hs.301059  | ZNF93                                                             | -2,74 | 1,67        | no                                             |
| 208379_x_at                                                         | hs.37125   | NPY2R                                                             | -2,72 | 1,67        | no                                             |
| 1552858_at                                                          | hs.376011  | MAGEB6                                                            | -2,72 | 1,67        | no                                             |
| 1556029_s_at                                                        | hs.497123  | NMNAT2                                                            | -2,72 | 1,67        | no                                             |
| 240638_at                                                           | hs.666351  | PLXNC1                                                            | -2,72 | 1,67        | no                                             |
| 215999_at                                                           | hs.632233  | CDRT1                                                             | -2,72 | 1,67        | no                                             |
| 1570621_at                                                          | hs.621382  | AFF1                                                              | -2,71 | 1,67        | no                                             |
| 210868_s_at                                                         | hs.412939  | ELOVL6                                                            | -2,71 | 1,67        | yes                                            |
| 223853_at                                                           | hs.221660  | BVES                                                              | -2,71 | 1,67        | no                                             |

|              |           |                                                        |       |      |     |
|--------------|-----------|--------------------------------------------------------|-------|------|-----|
| 238270_x_at  | ---       | ---                                                    | -2,69 | 1,67 | yes |
| 216967_at    | hs.134974 | GAP43                                                  | -2,69 | 1,67 | no  |
| 203400_s_at  | hs.518267 | TF                                                     | -2,69 | 1,67 | no  |
| 215614_at    | hs.677213 | LOC644974                                              | -2,69 | 1,67 | no  |
| 236264_at    | hs.28391  | LPHN3                                                  | -2,68 | 1,67 | no  |
| 234503_at    | hs.669940 | EEF1G                                                  | -2,68 | 1,67 | no  |
| 1561371_at   | hs.647162 | FLJ39080                                               | -2,68 | 1,67 | no  |
| 204213_at    | hs.497589 | PIGR                                                   | -2,66 | 1,67 | no  |
| 244649_at    | hs.189067 | LOC646484                                              | -2,65 | 1,67 | no  |
| 216119_s_at  | hs.72620  | C20orf28                                               | -2,65 | 1,67 | no  |
| 216592_at    | hs.356870 | MAGEC3                                                 | -2,65 | 1,67 | no  |
| 242348_at    | hs.187873 | FAM19A4                                                | -2,65 | 1,67 | no  |
| 225977_at    | hs.591691 | PCDH18                                                 | -2,64 | 1,67 | no  |
| 1556095_at   | hs.657273 | UNC13C                                                 | -2,64 | 1,67 | no  |
| 237956_s_at  | hs.519749 | LOC133874                                              | -2,64 | 1,67 | no  |
| 1556374_s_at | hs.662373 | ATP binding                                            | -2,63 | 1,67 | no  |
| 1555420_a_at | hs.471221 | KLF7                                                   | -2,63 | 1,67 | no  |
| 238730_at    | hs.516954 | ARHGEF11                                               | -2,62 | 2,92 | no  |
| 1558010_s_at | hs.502338 | SLC1A2                                                 | -2,61 | 2,92 | no  |
| 1567378_x_at | hs.655469 | DNAH1                                                  | -2,61 | 2,92 | no  |
| 207400_at    | hs.598503 | NPY5R                                                  | -2,61 | 2,92 | yes |
| 1555727_at   | ---       | ---                                                    | -2,61 | 2,92 | no  |
| 241628_at    | hs.666898 | EVI1                                                   | -2,61 | 2,92 | no  |
| 1561565_at   | hs.639414 | CDNA clone IMAGE                                       | -2,61 | 2,92 | no  |
| 236899_at    | hs.647784 | ---                                                    | -2,60 | 2,92 | no  |
| 211601_at    | ---       | CATR1                                                  | -2,60 | 2,92 | no  |
| 207452_s_at  | hs.656783 | CNTN5                                                  | -2,60 | 2,92 | no  |
| 1566030_at   | hs.669082 | PHACTR3                                                | -2,60 | 2,92 | no  |
| 217051_s_at  | hs.404263 | SS18                                                   | -2,60 | 2,92 | no  |
| 237504_at    | hs.512627 | INTS10                                                 | -2,59 | 2,92 | no  |
| 1552830_at   | hs.368364 | FBXO39                                                 | -2,59 | 2,92 | no  |
| 237982_at    | hs.350698 | CDNA clone IMAGE                                       | -2,59 | 2,92 | no  |
| 237884_x_at  | hs.512894 | TRPM7                                                  | -2,59 | 2,92 | no  |
| 1554999_at   | hs.591696 | RASGEF1B                                               | -2,59 | 2,92 | no  |
| 212568_s_at  | hs.335551 | DLAT                                                   | -2,59 | 2,92 | no  |
| 243487_at    | hs.519313 | AFF4                                                   | -2,58 | 2,92 | no  |
| 1568627_at   | hs.516182 | SMEK2                                                  | -2,58 | 2,92 | no  |
| 1555560_at   | hs.193226 | UGCGL2                                                 | -2,58 | 2,92 | no  |
| 233854_x_at  | hs.218366 | KLK4                                                   | -2,58 | 2,92 | no  |
| 1556874_a_at | hs.465144 | RKHD2                                                  | -2,57 | 2,92 | no  |
| 232451_at    | hs.216701 | MRNA; cDNA DKFZp564I0816<br>(from clone DKFZp564I0816) | -2,57 | 2,92 | no  |
| 210394_x_at  | hs.648298 | SSX4                                                   | -2,56 | 2,92 | no  |
| 1553506_at   | hs.684103 | CPO                                                    | -2,56 | 2,92 | no  |
| 1555880_at   | hs.631996 | HERV-FRD                                               | -2,56 | 2,92 | no  |
| 1557886_at   | hs.408676 | CCDC46                                                 | -2,56 | 2,92 | no  |
| 238262_at    | hs.511956 | SPDYA                                                  | -2,55 | 2,92 | no  |
| 214336_s_at  | hs.162121 | COPA                                                   | -2,55 | 2,92 | no  |
| 244154_at    | hs.592819 | CDNA FLJ34209 fis, clone<br>FCBBF3020599               | -2,55 | 2,92 | no  |
| 206731_at    | hs.632794 | CNKSR2                                                 | -2,55 | 2,92 | no  |
| 238838_at    | hs.443465 | TCERG1                                                 | -2,54 | 2,92 | no  |
| 225600_at    | hs.440643 | DKFZP779L1068                                          | -2,54 | 2,92 | no  |
| 231165_at    | hs.665710 | DDHD1                                                  | -2,54 | 2,92 | no  |

|              |           |                                                                                  |       |      |     |
|--------------|-----------|----------------------------------------------------------------------------------|-------|------|-----|
| 243542_at    | hs.444349 | PREPL                                                                            | -2,54 | 2,92 | no  |
| 1563260_at   | hs.385790 | C9orf107                                                                         | -2,54 | 2,92 | no  |
| 215495_s_at  | hs.98259  | SAMD4A                                                                           | -2,53 | 2,92 | no  |
| 207445_s_at  | hs.225946 | CCR9                                                                             | -2,53 | 2,92 | no  |
| 215167_at    | hs.407604 | CRSP2                                                                            | -2,52 | 2,92 | no  |
| 231138_at    | hs.247868 | TRPC5                                                                            | -2,52 | 2,92 | yes |
| 1554762_a_at | hs.333179 | WWC2                                                                             | -2,52 | 2,92 | no  |
| 1562278_at   | hs.655469 | DNAH1                                                                            | -2,52 | 2,92 | no  |
| 230992_at    | hs.546502 | BTNL9                                                                            | -2,51 | 2,92 | no  |
| 1569568_at   | hs.686193 | PISD                                                                             | -2,51 | 2,92 | yes |
| 211472_at    | hs.3989   | PLXNB2                                                                           | -2,51 | 2,92 | no  |
| 1552579_a_at | hs.178748 | ADAM21                                                                           | -2,50 | 2,92 | no  |
| 237311_at    | hs.668902 | DOCK1                                                                            | -2,50 | 2,92 | no  |
| 1556439_at   | hs.27908  | MRNA; cDNA DKFZp686M1114<br>(from clone DKFZp686M1114)                           | -2,50 | 2,92 | no  |
| 231852_at    | hs.20000  | THEX1                                                                            | -2,50 | 2,92 | no  |
| 223420_at    | hs.505676 | DNAJC14                                                                          | -2,50 | 2,92 | yes |
| 234515_at    | hs.546994 | PCGEM1                                                                           | -2,50 | 2,92 | no  |
| 241330_x_at  | ---       | ---                                                                              | -2,49 | 2,92 | no  |
| 219302_s_at  | hs.655684 | CNTNAP2                                                                          | -2,49 | 2,92 | no  |
| 234634_at    | hs.677321 | EXT1                                                                             | -2,49 | 2,92 | no  |
| 238421_at    | hs.533499 | MNAB                                                                             | -2,48 | 2,92 | no  |
| 1570180_at   | hs.646720 | BICC1                                                                            | -2,48 | 3,86 | no  |
| 236711_at    | hs.415766 | ZIC4                                                                             | -2,48 | 3,86 | no  |
| 234774_at    | hs.580807 | R3HDML                                                                           | -2,48 | 3,86 | no  |
| 1555000_at   | hs.683431 | LOC642970                                                                        | -2,48 | 3,86 | no  |
| 1565924_a_at | hs.670388 | SLC17A4                                                                          | -2,48 | 3,86 | no  |
| 241016_at    | Hs.372286 | CUL3                                                                             | -2,47 | 3,86 | no  |
| 235778_s_at  | hs.654819 | ANKRD44                                                                          | -2,47 | 3,86 | no  |
| 1562497_at   | hs.683854 | MKL2                                                                             | -2,47 | 3,86 | no  |
| 215816_at    | hs.148656 | LOC91316                                                                         | -2,47 | 3,86 | no  |
| 214642_x_at  | hs.668021 | MAGEA5                                                                           | -2,47 | 3,86 | no  |
| 1566151_at   | hs.679819 | YPEL4                                                                            | -2,47 | 3,86 | no  |
| 224296_x_at  | ---       | ---                                                                              | -2,47 | 3,86 | no  |
| 1561076_at   | hs.272317 | LRP5L                                                                            | -2,47 | 3,86 | no  |
| 1557518_a_at | hs.621450 | Full length insert cDNA clone<br>YB25F11                                         | -2,46 | 3,86 | no  |
| 1564029_at   | hs.665742 | USP49                                                                            | -2,46 | 3,86 | no  |
| 1568854_at   | hs.526951 | CDNA clone IMAGE                                                                 | -2,46 | 3,86 | no  |
| 222972_at    | hs.274264 | VSX1                                                                             | -2,46 | 3,86 | no  |
| 1557775_a_at | hs.679449 | RANBP17                                                                          | -2,45 | 3,86 | no  |
| 238962_at    | hs.399952 | Full-length cDNA clone<br>CS0DF003YC20 of Fetal brain<br>of Homo sapiens (human) | -2,45 | 3,86 | no  |
| 91816_f_at   | hs.436495 | RKHD1                                                                            | -2,45 | 3,86 | no  |
| 1562603_at   | hs.13680  | RFFL                                                                             | -2,45 | 3,86 | no  |
| 1554280_a_at | hs.632691 | C9orf43                                                                          | -2,45 | 3,86 | no  |
| 232263_at    | hs.44424  | SLC6A15                                                                          | -2,45 | 3,86 | no  |
| 232413_at    | hs.133444 | PGBD3                                                                            | -2,45 | 3,86 | no  |
| 216480_x_at  | hs.30385  | MLLT10                                                                           | -2,45 | 3,86 | no  |
| 215957_at    | hs.129683 | UBE2D1                                                                           | -2,44 | 3,86 | no  |
| 204465_s_at  | hs.500916 | INA                                                                              | -2,44 | 3,86 | no  |
| 1560913_at   | hs.521119 | Full length insert cDNA clone<br>ZC44D09                                         | -2,44 | 3,86 | no  |

|             |           |                                                                                       |       |      |     |
|-------------|-----------|---------------------------------------------------------------------------------------|-------|------|-----|
| 201858_s_at | hs.1908   | PRG1                                                                                  | -2,44 | 3,86 | no  |
| 1558807_at  | hs.467862 | KIAA1240                                                                              | -2,44 | 3,86 | no  |
| 229669_at   | ---       | LOC440416                                                                             | -2,44 | 3,86 | no  |
| 233316_at   | hs.655570 | MKLN1                                                                                 | -2,43 | 3,86 | no  |
| 222360_at   | hs.440776 | DPH5                                                                                  | -2,43 | 3,86 | no  |
| 206536_s_at | hs.356076 | BIRC4                                                                                 | -2,43 | 3,86 | no  |
| 1556312_at  | hs.354243 | FLJ34931                                                                              | -2,43 | 3,86 | no  |
| 218036_x_at | hs.656143 | NMD3                                                                                  | -2,43 | 3,86 | no  |
| 220435_at   | hs.284450 | SLC30A10                                                                              | -2,42 | 3,86 | no  |
| 1554337_at  | hs.657318 | FARP2                                                                                 | -2,42 | 3,86 | yes |
| 1570298_at  | hs.577558 | Homo sapiens, clone IMAGE                                                             | -2,42 | 3,86 | yes |
| 204174_at   | hs.507658 | ALOX5AP                                                                               | -2,42 | 3,86 | yes |
| 238195_at   | hs.23589  | Full length insert cDNA<br>YI09H09                                                    | -2,42 | 3,86 | no  |
| 1566207_at  | hs.491745 | TCEA1                                                                                 | -2,42 | 3,86 | no  |
| 207708_at   | hs.232770 | ALOXE3                                                                                | -2,42 | 3,86 | no  |
| 241482_at   | hs.662832 | EPHA1                                                                                 | -2,41 | 3,86 | no  |
| 211459_at   | ---       | ---                                                                                   | -2,41 | 3,86 | no  |
| 205884_at   | hs.654520 | ITGA4                                                                                 | -2,41 | 3,86 | no  |
| 224428_s_at | hs.470654 | CDCA7                                                                                 | -2,41 | 3,86 | no  |
| 1558451_at  | hs.435077 | LOC285500                                                                             | -2,41 | 3,86 | no  |
| 1560238_at  | hs.633102 | Homo sapiens, clone IMAGE                                                             | -2,41 | 3,86 | no  |
| 219894_at   | hs.141496 | MAGEL2                                                                                | -2,41 | 3,86 | no  |
| 1555394_at  | hs.178305 | PIGK                                                                                  | -2,41 | 3,86 | no  |
| 241744_x_at | hs.145933 | Transcribed locus                                                                     | -2,41 | 3,86 | no  |
| 233095_at   | hs.272208 | CDNA FLJ10095 fis, clone<br>HEMBA1002430                                              | -2,41 | 3,86 | no  |
| 236066_at   | hs.560741 | Transcribed locus                                                                     | -2,40 | 3,86 | yes |
| 217528_at   | hs.241551 | CLCA2                                                                                 | -2,40 | 3,86 | yes |
| 1561105_at  | hs.407600 | CDNA clone IMAGE                                                                      | -2,40 | 3,86 | no  |
| 1562628_at  | hs.567666 | KRT40                                                                                 | -2,40 | 3,86 | no  |
| 217322_x_at | ---       | ---                                                                                   | -2,40 | 3,86 | no  |
| 218737_at   | hs.577403 | SBNO1                                                                                 | -2,40 | 3,86 | yes |
| 207052_at   | hs.129711 | HAVCR1                                                                                | -2,40 | 3,86 | no  |
| 237722_at   | hs.504281 | FLI1                                                                                  | -2,40 | 3,86 | no  |
| 231612_at   | hs.120316 | NYD-SP26                                                                              | -2,39 | 3,86 | no  |
| 207821_s_at | hs.395482 | PTK2                                                                                  | -2,39 | 3,86 | yes |
| 206116_s_at | hs.133892 | TPM1                                                                                  | -2,39 | 3,86 | no  |
| 1552522_at  | hs.301243 | TIGD4                                                                                 | -2,39 | 3,86 | no  |
| 1553197_at  | hs.371738 | WDR21C                                                                                | -2,39 | 3,86 | no  |
| 1570306_at  | hs.655499 | ST18                                                                                  | -2,39 | 3,86 | no  |
| 1564749_at  | hs.617169 | LOC644420                                                                             | -2,39 | 3,86 | no  |
| 233150_at   | hs.647077 | GALNTL5                                                                               | -2,39 | 3,86 | no  |
| 41856_at    | hs.522997 | Full-length cDNA clone<br>CLOBB018ZE07 of<br>Neuroblastoma of Homo<br>sapiens (human) | -2,39 | 3,86 | no  |
| 230271_at   | hs.194725 | Homo sapiens, clone IMAGE                                                             | -2,38 | 3,86 | no  |
| 244675_at   | hs.20982  | RGS8                                                                                  | -2,38 | 3,86 | no  |
| 224109_at   | ---       | ---                                                                                   | -2,38 | 3,86 | no  |
| 207526_s_at | hs.66     | IL1RL1                                                                                | -2,38 | 3,86 | no  |
| 1561148_at  | hs.384579 | Full length insert cDNA clone<br>ZD88D12                                              | -2,38 | 3,86 | no  |
| 244226_s_at | Hs.656319 | RNF43                                                                                 | -2,38 | 3,86 | no  |

|             |           |                                                                                                  |       |      |     |
|-------------|-----------|--------------------------------------------------------------------------------------------------|-------|------|-----|
| 242456_at   | hs.192649 | MRE11A                                                                                           | -2,38 | 3,86 | no  |
| 234525_at   | hs.675490 | DLG2                                                                                             | -2,38 | 3,86 | no  |
| 240743_at   | ---       | ---                                                                                              | -2,38 | 3,86 | no  |
| 233418_at   | hs.648990 | LOC91450                                                                                         | -2,38 | 3,86 | no  |
| 206501_x_at | hs.22634  | ETV1                                                                                             | -2,37 | 4,45 | no  |
| 233928_at   | hs.476604 | ADAMTS9                                                                                          | -2,37 | 4,45 | no  |
| 243734_x_at | hs.657556 | ZPBP                                                                                             | -2,37 | 4,45 | no  |
| 1561509_at  | hs.686192 | C10orf30                                                                                         | -2,37 | 4,45 | no  |
| 1570033_at  | hs.122363 | WIPI2                                                                                            | -2,37 | 4,45 | no  |
| 206286_s_at | hs.385870 | TDGF1                                                                                            | -2,37 | 4,45 | no  |
| 241343_at   | hs.568006 | RNASEH1                                                                                          | -2,37 | 4,45 | no  |
| 214657_s_at | hs.648467 | TncRNA                                                                                           | -2,37 | 4,45 | yes |
| 234901_at   | ---       | ---                                                                                              | -2,36 | 4,45 | no  |
| 230226_s_at | hs.654806 | JARID1A                                                                                          | -2,36 | 4,45 | no  |
| 208853_s_at | hs.567968 | CANX                                                                                             | -2,36 | 4,45 | yes |
| 240170_at   | hs.586960 | Transcribed locus, weakly similar to NP_055301.1 neuronal thread protein AD7c-NTP [Homo sapiens] | -2,36 | 4,45 | no  |
| 215653_at   | hs.659575 | GPC5                                                                                             | -2,36 | 4,45 | no  |
| 1554781_at  | hs.679757 | MGC32805                                                                                         | -2,36 | 4,45 | no  |
| 238292_at   | hs.673989 | SFT2D1                                                                                           | -2,36 | 4,45 | no  |
| 212872_s_at | hs.278434 | TRFP                                                                                             | -2,36 | 4,45 | yes |
| 1561100_at  | hs.552142 | CDNA clone IMAGE                                                                                 | -2,36 | 4,45 | no  |
| 241545_x_at | hs.656771 | RBBP6                                                                                            | -2,36 | 4,45 | no  |
| 227843_at   | hs.655378 | NDE1                                                                                             | -2,36 | 4,45 | no  |
| 206951_at   | hs.662174 | HIST1H4E                                                                                         | -2,36 | 4,45 | no  |
| 231486_x_at | Hs.594372 | NHLRC2                                                                                           | -2,36 | 4,45 | no  |
| 206395_at   | hs.592771 | DGKG                                                                                             | -2,35 | 4,45 | no  |
| 1569024_at  | hs.97270  | FAM13A1                                                                                          | -2,35 | 4,45 | no  |
| 217042_at   | hs.226007 | RDH11                                                                                            | -2,35 | 4,45 | no  |
| 211020_at   | hs.519884 | GCNT2                                                                                            | -2,35 | 4,45 | no  |
| 220822_at   | ---       | ---                                                                                              | -2,35 | 4,45 | no  |
| 204570_at   | hs.421621 | COX7A1                                                                                           | -2,35 | 4,45 | yes |
| 1554420_at  | hs.460    | ATF3                                                                                             | -2,34 | 4,45 | no  |
| 226310_at   | hs.407926 | RICTOR                                                                                           | -2,34 | 4,45 | yes |
| 1553923_at  | hs.375139 | MGC34821                                                                                         | -2,34 | 4,45 | yes |
| 223010_s_at | hs.518750 | OCIAD1                                                                                           | -2,34 | 4,45 | no  |
| 1567238_at  | hs.684888 | OR2L2                                                                                            | -2,34 | 4,45 | no  |
| 1569401_at  | hs.190519 | CLEC12A                                                                                          | -2,34 | 4,45 | no  |
| 1566265_at  | hs.638748 | Full length insert cDNA YQ80D07                                                                  | -2,34 | 4,45 | yes |
| 212240_s_at | hs.132225 | PIK3R1                                                                                           | -2,33 | 4,45 | yes |
| 204423_at   | hs.44693  | MKLN1                                                                                            | -2,33 | 4,45 | no  |
| 1562433_at  | hs.591862 | FLJ10489                                                                                         | -2,33 | 4,45 | no  |
| 240841_at   | hs.62813  | INSM2                                                                                            | -2,33 | 4,45 | no  |
| 236532_at   | hs.172982 | LOC399947                                                                                        | -2,33 | 4,45 | no  |
| 1564595_at  | hs.650324 | LOC644386                                                                                        | -2,33 | 4,45 | no  |
| 1553949_at  | ---       | LOC400855                                                                                        | -2,33 | 4,45 | no  |
| 1556555_at  | hs.131700 | LOC648768                                                                                        | -2,33 | 4,45 | yes |
| 214772_at   | hs.502266 | C11orf41                                                                                         | -2,33 | 4,45 | no  |
| 234232_at   | hs.589128 | KBTBD2                                                                                           | -2,33 | 4,45 | no  |
| 1566183_at  | hs.637764 | CDNA FLJ25172 fis, clone                                                                         | -2,33 | 4,45 | no  |

|              |           | CBR08787          |       |      |     |
|--------------|-----------|-------------------|-------|------|-----|
| 211463_at    | hs.415766 | ZIC4              | -2,33 | 4,45 | no  |
| 1557828_a_at | ---       | LOC646916         | -2,32 | 4,45 | no  |
| 216809_at    | Hs.652996 | CYLC1             | -2,32 | 4,45 | no  |
| 216769_x_at  | hs.677331 | C9orf150          | -2,32 | 4,45 | no  |
| 1561333_at   | hs.560319 | CDNA clone IMAGE  | -2,32 | 4,45 | no  |
| 208332_at    | hs.158343 | PRY               | -2,32 | 4,45 | no  |
| 243128_at    | hs.119014 | ZNF175            | -2,32 | 4,45 | no  |
| 208181_at    | hs.655228 | HIST1H4H          | -2,32 | 4,45 | no  |
| 207317_s_at  | hs.57975  | CASQ2             | -2,32 | 4,45 | no  |
| 1555483_x_at | hs.530101 | FBLIM1            | -2,32 | 4,45 | no  |
| 244742_at    | hs.652123 | PAH               | -2,32 | 4,45 | yes |
| 1569241_a_at | hs.301059 | ZNF93             | -2,32 | 4,45 | no  |
| 238301_at    | hs.570757 | Transcribed locus | -2,32 | 4,45 | no  |
| 1554571_at   | hs.310421 | APBB1IP           | -2,32 | 4,45 | no  |
| 1561733_at   | hs.684055 | INPP5A            | -2,32 | 4,45 | no  |
| 231567_s_at  | hs.592008 | CCDC62            | -2,31 | 4,45 | no  |
| 215791_at    | hs.663677 | ITSN1             | -2,31 | 4,45 | no  |
| 1554569_a_at | hs.309288 | CUGBP2            | -2,31 | 4,45 | no  |
| 242855_at    | ---       | ---               | -2,31 | 4,45 | no  |
| 216899_s_at  | hs.200770 | SCAP2             | -2,31 | 4,45 | no  |
| 244136_at    | hs.664953 | LOC387762         | -2,31 | 4,45 | no  |
| 223751_x_at  | hs.120551 | TLR10             | -2,31 | 4,45 | yes |
| 1554716_s_at | hs.569502 | C15orf50          | -2,31 | 4,45 | no  |
| 1559817_at   | hs.525922 | CDNA clone IMAGE  | -2,31 | 4,45 | no  |
| 232432_s_at  | hs.631975 | SLC30A5           | -2,31 | 4,45 | no  |
| 238969_at    | ---       | ---               | -2,31 | 4,45 | no  |
| 1562458_at   | hs.597486 | UBE2W             | -2,31 | 4,45 | no  |
| 1566459_at   | hs.550242 | CDNA clone IMAGE  | -2,30 | 4,45 | no  |
| 203472_s_at  | hs.7884   | SLCO2B1           | -2,30 | 4,45 | no  |
| 220869_at    | hs.212774 | UBE1L2            | -2,30 | 4,45 | no  |
| 1557857_a_at | hs.657137 | DAD1              | -2,30 | 4,45 | no  |
| 202352_s_at  | hs.646575 | PSMD12            | -2,30 | 4,45 | no  |
| 1562828_at   | hs.385502 | CDNA clone IMAGE  | -2,30 | 4,45 | yes |
| 214845_s_at  | hs.7753   | CALU              | -2,30 | 4,45 | no  |
