# Supplementary material
Source: PubMed Central journal article supplement (PMC2723986)
Supplement: ASN.2008111145_11.pdf [file ASN.2008111145_11.pdf]

Supplemental Table 6

Pearson correlation analysis between complement gene expression in micro-arrays and renal allograft function in the first 3 years after transplantation (N=28).

|                  | Schwartz<br>GFR day 1 | Schwartz<br>GFR day 1 | Schwartz<br>GFR day 2 | Schwartz<br>GFR day 3 | Schwartz<br>GFR day 7 | Schwartz<br>GFR day 14 | Schwartz<br>GFR 3<br>months | Schwartz<br>GFR 6<br>months | Schwartz<br>GFR 12<br>months | Schwartz<br>GFR 24<br>months | Schwartz<br>GFR 36<br>months |
|------------------|-----------------------|-----------------------|-----------------------|-----------------------|-----------------------|------------------------|-----------------------------|-----------------------------|------------------------------|------------------------------|------------------------------|
| C1QB_202953_at   | r=-0.27<br>p=0.1652   | r=-0.35<br>p=0.0752   | r=-0.59<br>p=0.0013   | r=-0.52<br>p=0.0058   | r=-0.38<br>p=0.0483   | r=-0.39<br>p=0.0462    | r=-0.22<br>p=0.2613         | r=-0.25<br>p=0.2022         | r=-0.22<br>p=0.2644          | r=-0.38<br>p=0.0526          | r=-0.42<br>p=0.0329          |
| C1QC_225353_s_at | r=-0.25<br>p=0.2009   | r=-0.36<br>p=0.0646   | r=-0.60<br>p=0.0009   | r=-0.52<br>p=0.0054   | r=-0.40<br>p=0.0366   | r=-0.42<br>p=0.0312    | r=-0.19<br>p=0.3294         | r=-0.19<br>p=0.3445         | r=-0.13<br>p=0.5269          | r=-0.25<br>p=0.2177          | r=-0.26<br>p=0.1949          |
| C1R_212067_s_at  | r=-0.16<br>p=0.4267   | r=-0.31<br>p=0.1196   | r=-0.49<br>p=0.0088   | r=-0.43<br>p=0.0249   | r=-0.33<br>p=0.0904   | r=-0.31<br>p=0.1178    | r=-0.24<br>p=0.2130         | r=-0.28<br>p=0.1439         | r=-0.32<br>p=0.1070          | r=-0.38<br>p=0.0476          | r=-0.39<br>p=0.0462          |
| C1RL_218983_at   | r=-0.19<br>p=0.3456   | r=-0.27<br>p=0.1711   | r=-0.42<br>p=0.0284   | r=-0.34<br>p=0.0782   | r=-0.27<br>p=0.1802   | r=-0.28<br>p=0.1564    | r=-0.15<br>p=0.4525         | r=-0.18<br>p=0.3585         | r=-0.19<br>p=0.3299          | r=-0.27<br>p=0.1677          | r=-0.29<br>p=0.1580          |
| C1S_208747_s_at  | r=-0.09<br>p=0.6332   | r=-0.30<br>p=0.1327   | r=-0.44<br>p=0.0224   | r=-0.36<br>p=0.0624   | r=-0.26<br>p=0.1850   | r=-0.24<br>p=0.2247    | r=-0.16<br>p=0.4224         | r=-0.24<br>p=0.2228         | r=-0.27<br>p=0.1720          | r=-0.34<br>p=0.0817          | r=-0.36<br>p=0.0740          |
| C2_1554533_at    | r=-0.26<br>p=0.1759   | r=-0.34<br>p=0.0822   | r=-0.50<br>p=0.0080   | r=-0.46<br>p=0.0157   | r=-0.32<br>p=0.1062   | r=-0.43<br>p=0.0255    | r=-0.23<br>p=0.2316         | r=-0.19<br>p=0.3337         | r=-0.29<br>p=0.1440          | r=-0.48<br>p=0.0122          | r=-0.51<br>p=0.0078          |
| C2_203052_at     | r=-0.31<br>p=0.1140   | r=-0.32<br>p=0.1031   | r=-0.52<br>p=0.0054   | r=-0.45<br>p=0.0183   | r=-0.33<br>p=0.0972   | r=-0.43<br>p=0.0267    | r=-0.20<br>p=0.3008         | r=-0.12<br>p=0.5319         | r=-0.27<br>p=0.1808          | r=-0.42<br>p=0.0310          | r=-0.44<br>p=0.0248          |
| C3_217767_at     | r=-0.21<br>p=0.2883   | r=-0.27<br>p=0.1766   | r=-0.47<br>p=0.0126   | r=-0.40<br>p=0.0410   | r=-0.32<br>p=0.1017   | r=-0.33<br>p=0.0970    | r=-0.22<br>p=0.2582         | r=-0.21<br>p=0.2829         | r=-0.25<br>p=0.2079          | r=-0.32<br>p=0.1028          | r=-0.32<br>p=0.1161          |
| C4A_208451_s_at  | r=-0.16<br>p=0.4124   | r=-0.37<br>p=0.0603   | r=-0.49<br>p=0.0100   | r=-0.36<br>p=0.0632   | r=-0.25<br>p=0.2156   | r=-0.39<br>p=0.0432    | r=-0.16<br>p=0.4106         | r=-0.20<br>p=0.2970         | r=-0.21<br>p=0.2950          | r=-0.42<br>p=0.0275          | r=-0.47<br>p=0.0146          |
| C4A_214428_x_at  | r=-0.12<br>p=0.5289   | r=-0.39<br>p=0.0464   | r=-0.50<br>p=0.0084   | r=-0.38<br>p=0.0478   | r=-0.25<br>p=0.2125   | r=-0.40<br>p=0.0382    | r=-0.21<br>p=0.2906         | r=-0.25<br>p=0.1985         | r=-0.23<br>p=0.2403          | r=-0.44<br>p=0.0207          | r=-0.48<br>p=0.0130          |
| C6_210168_at     | r=-0.22<br>p=0.2663   | r=-0.35<br>p=0.0746   | r=-0.48<br>p=0.0108   | r=-0.40<br>p=0.0385   | r=-0.29<br>p=0.1420   | r=-0.32<br>p=0.1042    | r=-0.18<br>p=0.3492         | r=-0.24<br>p=0.2256         | r=-0.29<br>p=0.1390          | r=-0.39<br>p=0.0450          | r=-0.41<br>p=0.0365          |
| CFB_202357_s_at  | r=-0.22<br>p=0.2556   | r=-0.30<br>p=0.1337   | r=-0.51<br>p=0.0068   | r=-0.43<br>p=0.0269   | r=-0.30<br>p=0.1287   | r=-0.33<br>p=0.0916    | r=-0.20<br>p=0.3001         | r=-0.21<br>p=0.2932         | r=-0.24<br>p=0.2230          | r=-0.34<br>p=0.0859          | r=-0.35<br>p=0.0813          |
