# Supplementary material
Source: PubMed Central journal article supplement (PMC2723986)
Supplement: ASN.2008111145_12.pdf [file ASN.2008111145_12.pdf]

### Supplemental Table 7

qRT-PCR validation and correlation between microarray results and qRT-PCR.

| Gene | Taqman <sup>®</sup> assay | Pearson correlation coefficient | p-value |
|------|---------------------------|---------------------------------|---------|
| C1QB | Hs00608019_m1             | 0,96746                         | <0.0001 |
| C2   | Hs00163794_m1             | 0,93421                         | <0.0001 |
| C3   | Hs00163811_m1             | 0,96156                         | <0.0001 |
| C4   | Hs00246758_m1             | 0,68334                         | 0,0025  |
| CFB  | Hs00156060_m1             | 0,93063                         | <0.0001 |
| CR1  | Hs00167075_m1             | 0,79054                         | 0,0002  |
